# Supplementary material for: Metaproteomic Comparison of Cryoconite Communities from Caucasian and Novaya Zemlya Glaciers
Source: Research Square preprint supplement (doi:10.21203/rs.3.rs-999957/v1), 2021-11-30
Supplement: Supplementary file 1 [file 8b05c4a08de87683cbc5b880.xlsx]

## Sheet: Novaya_Zemlya_proteins
s	X	Accession	n	Protein.Group	Description	codes	K2	K4	K3	K5	K1	uniprot	Mnemonic	Scientific.name	Common.name	Synonym	Other.Names	Reviewed	Rank	Lineage	Parent
43	455	tr|E8WVD9|E8WVD9_GRATM	7	383	60 kDa chaperonin OS=Granulicella tundricola (strain ATCC BAA-1859 / DSM 23138 / MP5ACTX9) OX=1198114 GN=groL PE=3 SV=1	1198114	NA	2	NA	NA	NA	E8WVD9	GRATM	Granulicella tundricola (strain ATCC BAA-1859 / DSM 23138 / MP5ACTX9)			Acidobacterium sp. MP5ACTX9; Granulicella sp. MP5ACTX9; Granulicella tundricola MP5ACTX9; Granulicella tundricola str. MP5ACTX9; Granulicella tundricola strain MP5ACTX9	annotated		Bacteria; Acidobacteria; Acidobacteriales; Acidobacteriaceae; Granulicella	940615
263	430	tr|A0A7C6DUT5|A0A7C6DUT5_9BACT	2	2489	DUF4331 domain-containing protein OS=Blastocatellia bacterium OX=2052146 GN=ENR46_01100 PE=4 SV=1	2052146	6	3	NA	NA	NA	A0A7C6DUT5		Blastocatellia bacterium				annotated	Species	Bacteria; Acidobacteria; Blastocatellia	2052145
79	429	tr|A0A7C4C091|A0A7C4C091_9BACT	6	675	60 kDa chaperonin OS=Bryobacteraceae bacterium OX=2212468 GN=groL PE=3 SV=1	2212468	NA	2	NA	NA	NA	A0A7C4C091		Bryobacteraceae bacterium				annotated	Species	Bacteria; Acidobacteria; Bryobacterales; Bryobacteraceae	2212464
225	394	tr|A0A6I3DDT0|A0A6I3DDT0_9ACTN	3	2150	Fasciclin domain-containing protein OS=Actinobacteria bacterium OX=1883427 GN=F2634_00725 PE=4 SV=1	1883427	5	6	NA	2	NA	A0A6I3DDT0		Actinobacteria bacterium			actinobacterium	annotated	Species	Bacteria; Actinobacteria	52018
140	355	tr|A0A522BGJ9|A0A522BGJ9_9ACTN	5	1300	Cold-shock protein OS=Frankiales bacterium OX=1909291 GN=EPN99_12420 PE=4 SV=1	1909291	3	7	9	3	3	A0A522BGJ9		Frankiales bacterium				annotated	Species	Bacteria; Actinobacteria; Frankiales	1920255
282	356	tr|A0A522BUZ4|A0A522BUZ4_9ACTN	2	2763	Cold-shock protein OS=Frankiales bacterium OX=1909291 GN=EPN99_07700 PE=4 SV=1	1909291	2	NA	4	NA	NA	A0A522BUZ4		Frankiales bacterium				annotated	Species	Bacteria; Actinobacteria; Frankiales	1920255
180	277	tr|A0A2V1HPZ0|A0A2V1HPZ0_9MICO	5	1786	30S ribosomal protein S1 OS=Amnibacterium flavum OX=2173173 GN=DDQ50_11790 PE=4 SV=1	2173173	2	3	7	NA	NA	A0A2V1HPZ0		Amnibacterium flavum			Amnibacterium flavum Tuo et al. 2019; Amnibacterium sp. M8JJ-5; CGMCC 1.16390; KCTC 49089; strain M8JJ-5	annotated	Species	Bacteria; Actinobacteria; Micrococcales; Microbacteriaceae; Amnibacterium	1029631
147	354	tr|A0A4R8YKV2|A0A4R8YKV2_9MICO	8	1380	Glycerol kinase OS=Cryobacterium breve OX=1259258 GN=glpK PE=3 SV=1	1259258	3	2	4	NA	NA	A0A4R8YKV2		Cryobacterium breve			CGMCC 1.9556; Cryobacterium breve Liu et al. 2020; Cryobacterium sp. TMT4-23; NBRC 113800; strain TMT4-23	annotated	Species	Bacteria; Actinobacteria; Micrococcales; Microbacteriaceae; Cryobacterium	69578
245	353	tr|A0A4R8VT96|A0A4R8VT96_9MICO	2	2305	30S ribosomal protein S9 OS=Cryobacterium sp. MDB2-B OX=1259183 GN=rpsI PE=3 SV=1	1259183	NA	NA	3	NA	NA	A0A4R8VT96		Cryobacterium sp. MDB2-B				annotated	Species	Bacteria; Actinobacteria; Micrococcales; Microbacteriaceae; Cryobacterium; unclassified Cryobacterium	2649013
212	375	tr|A0A5C8UUW4|A0A5C8UUW4_9MICO	5	2034	50S ribosomal protein L7/L12 OS=Lacisediminihabitans profunda OX=2594790 GN=rplL PE=3 SV=1	2594790	2	2	4	NA	NA	A0A5C8UUW4		Lacisediminihabitans profunda			"Lacisediminihabitans profunda" Zhuo et al. 2020; Glaciihabitans sp. CHu50b-6-2; JCM 32673; KCTC 49081; Microbacteriaceae bacterium CHu50b-6-2; strain CHu50b-6-2	annotated	Species	Bacteria; Actinobacteria; Micrococcales; Microbacteriaceae; Lacisediminihabitans	2740558
168	61	tr|A0A1E4M6G6|A0A1E4M6G6_9MICO	7	1646	Cold-shock protein OS=Leifsonia sp. SCN 70-46 OX=1660107 GN=ABT06_14890 PE=4 SV=1	1660107	NA	NA	2	2	3	A0A1E4M6G6		Leifsonia sp. SCN 70-46				annotated	Species	Bacteria; Actinobacteria; Micrococcales; Microbacteriaceae; Leifsonia	2663824
190	38	tr|A0A0T2KRR3|A0A0T2KRR3_9MICO	3	1916	ATP synthase subunit beta OS=Microbacterium sp. Root61 OX=1736570 GN=atpD PE=3 SV=1	1736570	NA	2	5	NA	NA	A0A0T2KRR3		Microbacterium sp. Root61				annotated	Species	Bacteria; Actinobacteria; Micrococcales; Microbacteriaceae; Microbacterium	2609290
134	32	tr|A0A0Q6R5S0|A0A0Q6R5S0_9MICO	5	1265	Cold-shock protein OS=Yonghaparkia sp. Root332 OX=1736516 GN=ASC54_08850 PE=4 SV=1	1736516	5	7	7	5	2	A0A0Q6R5S0		Yonghaparkia sp. Root332				annotated	Species	Bacteria; Actinobacteria; Micrococcales; Microbacteriaceae; Yonghaparkia; unclassified Yonghaparkia	2645988
293	33	tr|A0A0Q6R845|A0A0Q6R845_9MICO	2	3011	Sugar ABC transporter substrate-binding protein OS=Yonghaparkia sp. Root332 OX=1736516 GN=ASC54_01330 PE=4 SV=1	1736516	NA	2	3	NA	NA	A0A0Q6R845		Yonghaparkia sp. Root332				annotated	Species	Bacteria; Actinobacteria; Micrococcales; Microbacteriaceae; Yonghaparkia; unclassified Yonghaparkia	2645988
195	65	tr|A0A1H9GR64|A0A1H9GR64_9PSEU	2	1947	Uncharacterized protein OS=Lentzea albida OX=65499 GN=SAMN04488000_103239 PE=4 SV=1	65499	NA	NA	10	NA	NA	A0A1H9GR64		Lentzea albida			"Asiosporangium albidum" Runmao et al.; "Streptomyces staurosporeus" Omura et al. 1977; Asiosporangium albidum; DSM 44437; IFO 16102; JCM 10670; Lentzea albida Labeda et al. 2001; Lentzea albida Labeda et al. 2001 emend. Nouioui et al. 2018; NBRC 16102; NRRL B-24073; Saccharothrix aerocolonigenes subsp staurosporea corrig (ex Omura et al '77) Takahashi et al'96; Saccharothrix aerocolonigenes subs…	annotated	Species	Bacteria; Actinobacteria; Pseudonocardiales; Pseudonocardiaceae; Lentzea	165301
231	78	tr|A0A1X7DIP4|A0A1X7DIP4_9ACTN	4	2205	Elongation factor Tu OS=Streptomyces sp. Amel2xC10 OX=1305826 GN=tuf PE=3 SV=1	1305826	4	3	2	NA	NA	A0A1X7DIP4		Streptomyces sp. Amel2xC10				annotated	Species	Bacteria; Actinobacteria; Streptomycetales; Streptomycetaceae; Streptomyces	2593676
133	125	tr|A0A2E0L0L3|A0A2E0L0L3_9CHLR	4	1260	60 kDa chaperonin OS=Anaerolineaceae bacterium OX=2024896 GN=groL PE=3 SV=1	2024896	2	NA	NA	NA	NA	A0A2E0L0L3		Anaerolineaceae bacterium				annotated	Species	Bacteria; Chloroflexi; Anaerolineae; Anaerolineales; Anaerolineaceae	1324991
103	345	tr|A0A426TSN7|A0A426TSN7_9CHLR	3	894	60 kDa chaperonin OS=Candidatus Viridilinea halotolerans OX=2491704 GN=groL PE=3 SV=1	2491704	11	15	NA	NA	NA	A0A426TSN7		Candidatus Viridilinea halotolerans			Candidatus Viridilinea halotolerans Grouzdev et al. 2019; Candidatus Viridilinea sp. Chok-6; Viridilinea halotolerans	annotated	Species	Bacteria; Chloroflexi; Chloroflexia; Chloroflexales; Chloroflexineae; Oscillochloridaceae; Candidatus Viridilinea	2491136
196	323	tr|A0A3D2J724|A0A3D2J724_9CHLR	4	1951	ATP synthase subunit alpha OS=Ktedonobacter sp. OX=1932716 GN=atpA PE=3 SV=1	1932716	3	3	NA	NA	NA	A0A3D2J724		Ktedonobacter sp.				annotated	Species	Bacteria; Chloroflexi; Ktedonobacteria; Ktedonobacterales; Ktedonobacteraceae; Ktedonobacter; unclassified Ktedonobacter	388461
14	221	tr|A0A2T1DTX6|A0A2T1DTX6_9CYAN	9	162	ATP synthase subunit beta OS=filamentous cyanobacterium Phorm 46 OX=2107705 GN=atpD PE=3 SV=1	2107705	54	31	39	16	4	A0A2T1DTX6		filamentous cyanobacterium Phorm 46				annotated	Species	Bacteria; Cyanobacteria	1983111
19	228	tr|A0A2T1E7R4|A0A2T1E7R4_9CYAN	9	244	Porin OS=filamentous cyanobacterium Phorm 46 OX=2107705 GN=C7B69_09895 PE=3 SV=1	2107705	14	8	52	2	NA	A0A2T1E7R4		filamentous cyanobacterium Phorm 46				annotated	Species	Bacteria; Cyanobacteria	1983111
46	227	tr|A0A2T1E4K7|A0A2T1E4K7_9CYAN	9	405	Porin OS=filamentous cyanobacterium Phorm 46 OX=2107705 GN=C7B69_10520 PE=3 SV=1	2107705	10	4	11	2	NA	A0A2T1E4K7		filamentous cyanobacterium Phorm 46				annotated	Species	Bacteria; Cyanobacteria	1983111
58	223	tr|A0A2T1DYZ8|A0A2T1DYZ8_9CYAN	4	505	Carbon dioxide-concentrating mechanism protein CcmK OS=filamentous cyanobacterium Phorm 46 OX=2107705 GN=C7B69_12330 PE=3 SV=1	2107705	21	13	20	NA	NA	A0A2T1DYZ8		filamentous cyanobacterium Phorm 46				annotated	Species	Bacteria; Cyanobacteria	1983111
63	241	tr|A0A2T1F423|A0A2T1F423_9CYAN	3	539	Red carotenoid-binding protein OS=filamentous cyanobacterium Phorm 46 OX=2107705 GN=C7B69_01700 PE=3 SV=1	2107705	13	6	38	NA	NA	A0A2T1F423		filamentous cyanobacterium Phorm 46				annotated	Species	Bacteria; Cyanobacteria	1983111
65	225	tr|A0A2T1E007|A0A2T1E007_9CYAN	4	549	Bleomycin hydrolase OS=filamentous cyanobacterium Phorm 46 OX=2107705 GN=C7B69_12020 PE=3 SV=1	2107705	24	8	23	2	NA	A0A2T1E007		filamentous cyanobacterium Phorm 46				annotated	Species	Bacteria; Cyanobacteria	1983111
82	249	tr|A0A2T1FIY8|A0A2T1FIY8_9CYAN	5	694	Polyribonucleotide nucleotidyltransferase OS=filamentous cyanobacterium Phorm 6 OX=2107706 GN=pnp PE=3 SV=1	2107706	14	12	15	NA	NA	A0A2T1FIY8		filamentous cyanobacterium Phorm 6				annotated	Species	Bacteria; Cyanobacteria	1983111
106	239	tr|A0A2T1EVW3|A0A2T1EVW3_9CYAN	2	932	Phycobilisome rod-core linker polypeptide CpcG OS=filamentous cyanobacterium Phorm 46 OX=2107705 GN=C7B69_04120 PE=3 SV=1	2107705	11	NA	24	NA	NA	A0A2T1EVW3		filamentous cyanobacterium Phorm 46				annotated	Species	Bacteria; Cyanobacteria	1983111
109	224	tr|A0A2T1E003|A0A2T1E003_9CYAN	4	966	Bleomycin hydrolase OS=filamentous cyanobacterium Phorm 46 OX=2107705 GN=C7B69_12025 PE=3 SV=1	2107705	6	2	24	2	NA	A0A2T1E003		filamentous cyanobacterium Phorm 46				annotated	Species	Bacteria; Cyanobacteria	1983111
116	233	tr|A0A2T1EMH6|A0A2T1EMH6_9CYAN	4	1063	Bicarbonate-binding protein OS=filamentous cyanobacterium Phorm 46 OX=2107705 GN=C7B69_06370 PE=3 SV=1	2107705	14	NA	9	NA	NA	A0A2T1EMH6		filamentous cyanobacterium Phorm 46				annotated	Species	Bacteria; Cyanobacteria	1983111
125	143	tr|A0A2N5JP95|A0A2N5JP95_9CYAN	4	1186	Phycocyanin subunit alpha OS=Cyanobacteria bacterium M5B4 OX=2054928 GN=cpcA PE=3 SV=1	2054928	13	8	3	4	NA	A0A2N5JP95		Cyanobacteria bacterium M5B4				annotated	Species	Bacteria; Cyanobacteria	1983111
127	240	tr|A0A2T1F3L8|A0A2T1F3L8_9CYAN	2	1193	Photosystem reaction center subunit H OS=filamentous cyanobacterium Phorm 46 OX=2107705 GN=C7B69_02235 PE=4 SV=1	2107705	23	NA	5	NA	NA	A0A2T1F3L8		filamentous cyanobacterium Phorm 46				annotated	Species	Bacteria; Cyanobacteria	1983111
137	238	tr|A0A2T1EVB5|A0A2T1EVB5_9CYAN	4	1280	30S ribosomal protein S9 OS=filamentous cyanobacterium Phorm 46 OX=2107705 GN=rpsI PE=3 SV=1	2107705	6	3	13	NA	NA	A0A2T1EVB5		filamentous cyanobacterium Phorm 46				annotated	Species	Bacteria; Cyanobacteria	1983111
139	317	tr|A0A351LD54|A0A351LD54_9CYAN	2	1296	Uncharacterized protein OS=Cyanobacteria bacterium UBA11371 OX=2055770 GN=DCZ55_30790 PE=4 SV=1	2055770	16	9	NA	NA	NA	A0A351LD54		Cyanobacteria bacterium UBA11371				annotated	Species	Bacteria; Cyanobacteria	1983111
150	171	tr|A0A2T1DCM7|A0A2T1DCM7_9CYAN	3	1414	Photosystem reaction center subunit H OS=filamentous cyanobacterium CCP2 OX=2107700 GN=C7B76_08510 PE=4 SV=1	2107700	NA	14	NA	2	NA	A0A2T1DCM7		filamentous cyanobacterium CCP2				annotated	Species	Bacteria; Cyanobacteria	1983111
159	253	tr|A0A2T1FQI5|A0A2T1FQI5_9CYAN	4	1515	DNA-directed RNA polymerase subunit beta' OS=filamentous cyanobacterium Phorm 6 OX=2107706 GN=rpoC2 PE=3 SV=1	2107706	7	5	NA	NA	NA	A0A2T1FQI5		filamentous cyanobacterium Phorm 6				annotated	Species	Bacteria; Cyanobacteria	1983111
211	219	tr|A0A2T1DR73|A0A2T1DR73_9CYAN	3	2032	50S ribosomal subunit assembly factor BipA OS=filamentous cyanobacterium Phorm 46 OX=2107705 GN=typA PE=3 SV=1	2107705	5	2	7	NA	NA	A0A2T1DR73		filamentous cyanobacterium Phorm 46				annotated	Species	Bacteria; Cyanobacteria	1983111
223	250	tr|A0A2T1FK22|A0A2T1FK22_9CYAN	3	2132	50S ribosomal protein L4 OS=filamentous cyanobacterium Phorm 6 OX=2107706 GN=rplD PE=3 SV=1	2107706	7	NA	3	NA	NA	A0A2T1FK22		filamentous cyanobacterium Phorm 6				annotated	Species	Bacteria; Cyanobacteria	1983111
228	166	tr|A0A2T1DB53|A0A2T1DB53_9CYAN	2	2172	Type 1 glutamine amidotransferase OS=filamentous cyanobacterium Phorm 46 OX=2107705 GN=C7B69_17185 PE=3 SV=1	2107705	3	NA	9	NA	NA	A0A2T1DB53		filamentous cyanobacterium Phorm 46				annotated	Species	Bacteria; Cyanobacteria	1983111
235	255	tr|A0A2T1FWQ2|A0A2T1FWQ2_9CYAN	2	2228	Uncharacterized protein OS=filamentous cyanobacterium Phorm 6 OX=2107706 GN=C7B67_16880 PE=4 SV=1	2107706	3	NA	8	NA	NA	A0A2T1FWQ2		filamentous cyanobacterium Phorm 6				annotated	Species	Bacteria; Cyanobacteria	1983111
240	153	tr|A0A2T1CZ40|A0A2T1CZ40_9CYAN	2	2270	Uncharacterized protein OS=filamentous cyanobacterium Phorm 46 OX=2107705 GN=C7B69_20180 PE=4 SV=1	2107705	6	NA	5	NA	NA	A0A2T1CZ40		filamentous cyanobacterium Phorm 46				annotated	Species	Bacteria; Cyanobacteria	1983111
242	252	tr|A0A2T1FPT4|A0A2T1FPT4_9CYAN	2	2277	Histidine kinase OS=filamentous cyanobacterium Phorm 6 OX=2107706 GN=C7B67_19620 PE=4 SV=1	2107706	5	NA	6	NA	NA	A0A2T1FPT4		filamentous cyanobacterium Phorm 6				annotated	Species	Bacteria; Cyanobacteria	1983111
252	236	tr|A0A2T1EV35|A0A2T1EV35_9CYAN	2	2385	DNA-directed RNA polymerase subunit alpha OS=filamentous cyanobacterium Phorm 46 OX=2107705 GN=rpoA PE=3 SV=1	2107705	6	NA	NA	NA	NA	A0A2T1EV35		filamentous cyanobacterium Phorm 46				annotated	Species	Bacteria; Cyanobacteria	1983111
258	154	tr|A0A2T1CZ47|A0A2T1CZ47_9CYAN	2	2429	Phospholipid-binding protein OS=filamentous cyanobacterium Phorm 46 OX=2107705 GN=C7B69_20120 PE=4 SV=1	2107705	5	NA	5	NA	NA	A0A2T1CZ47		filamentous cyanobacterium Phorm 46				annotated	Species	Bacteria; Cyanobacteria	1983111
261	319	tr|A0A357A6Y5|A0A357A6Y5_9CYAN	2	2464	Carbon dioxide-concentrating protein CcmK OS=Cyanobacteria bacterium UBA11691 OX=2055778 GN=DD761_07525 PE=3 SV=1	2055778	2	6	NA	NA	NA	A0A357A6Y5		Cyanobacteria bacterium UBA11691				annotated	Species	Bacteria; Cyanobacteria	1983111
262	222	tr|A0A2T1DYR8|A0A2T1DYR8_9CYAN	2	2477	Carbon dioxide concentrating mechanism protein CcmM OS=filamentous cyanobacterium Phorm 46 OX=2107705 GN=C7B69_12345 PE=3 SV=1	2107705	6	NA	3	NA	NA	A0A2T1DYR8		filamentous cyanobacterium Phorm 46				annotated	Species	Bacteria; Cyanobacteria	1983111
267	151	tr|A0A2T1CFT4|A0A2T1CFT4_9CYAN	2	2528	Uncharacterized protein OS=filamentous cyanobacterium Phorm 46 OX=2107705 GN=C7B69_23700 PE=4 SV=1	2107705	7	NA	2	NA	NA	A0A2T1CFT4		filamentous cyanobacterium Phorm 46				annotated	Species	Bacteria; Cyanobacteria	1983111
280	7	tr|A0A077JHA5|A0A077JHA5_9CYAN	2	2756	Nitrogen-responsive regulatory protein OS=cyanobacterium endosymbiont of Epithemia turgida isolate EtSB Lake Yunoko OX=1228987 GN=ntcA PE=4 SV=1	1228987	4	NA	NA	NA	NA	A0A077JHA5		cyanobacterium endosymbiont of Epithemia turgida isolate EtSB Lake Yunoko				annotated		Bacteria; Cyanobacteria	718217
283	194	tr|A0A2T1DHN2|A0A2T1DHN2_9CYAN	2	2783	AbrB family transcriptional regulator OS=filamentous cyanobacterium Phorm 46 OX=2107705 GN=C7B69_16405 PE=4 SV=1	2107705	5	NA	2	NA	NA	A0A2T1DHN2		filamentous cyanobacterium Phorm 46				annotated	Species	Bacteria; Cyanobacteria	1983111
292	232	tr|A0A2T1ELH2|A0A2T1ELH2_9CYAN	2	2966	Rhodanese-like domain-containing protein OS=filamentous cyanobacterium Phorm 46 OX=2107705 GN=C7B69_06480 PE=4 SV=1	2107705	2	2	NA	NA	NA	A0A2T1ELH2		filamentous cyanobacterium Phorm 46				annotated	Species	Bacteria; Cyanobacteria	1983111
294	152	tr|A0A2T1CXQ4|A0A2T1CXQ4_9CYAN	2	3012	Organic solvent tolerance protein OstA OS=filamentous cyanobacterium CCP2 OX=2107700 GN=C7B76_21675 PE=4 SV=1	2107700	2	3	NA	NA	NA	A0A2T1CXQ4		filamentous cyanobacterium CCP2				annotated	Species	Bacteria; Cyanobacteria	1983111
185	14	tr|A0A0D8ZX60|A0A0D8ZX60_9CYAN	2	1850	Phycocyanin OS=Aliterella atlantica CENA595 OX=1618023 GN=UH38_10430 PE=3 SV=1	1618023	13	3	NA	NA	NA	A0A0D8ZX60		Aliterella atlantica CENA595			Chroococcales cyanobacterium CENA595	annotated		Bacteria; Cyanobacteria; Chroococcidiopsidales; Chroococcidiopsidaceae; Aliterella	1827278
197	15	tr|A0A0D8ZX73|A0A0D8ZX73_9CYAN	5	1958	Phospholipid-binding protein OS=Aliterella atlantica CENA595 OX=1618023 GN=UH38_00850 PE=4 SV=1	1618023	3	4	NA	NA	NA	A0A0D8ZX73		Aliterella atlantica CENA595			Chroococcales cyanobacterium CENA595	annotated		Bacteria; Cyanobacteria; Chroococcidiopsidales; Chroococcidiopsidaceae; Aliterella	1827278
239	13	tr|A0A0D8ZTV3|A0A0D8ZTV3_9CYAN	2	2267	Phosphoglucosamine mutase OS=Aliterella atlantica CENA595 OX=1618023 GN=UH38_10520 PE=3 SV=1	1618023	6	5	NA	NA	NA	A0A0D8ZTV3		Aliterella atlantica CENA595			Chroococcales cyanobacterium CENA595	annotated		Bacteria; Cyanobacteria; Chroococcidiopsidales; Chroococcidiopsidaceae; Aliterella	1827278
35	148	tr|A0A2P8QNZ6|A0A2P8QNZ6_9CYAN	3	338	Phycocyanin subunit beta OS=Chroococcidiopsis sp. CCALA 051 OX=869949 GN=C7Y66_17135 PE=3 SV=1	869949	46	37	NA	13	NA	A0A2P8QNZ6		Chroococcidiopsis sp. CCALA 051			Chroococcidiopsis sp. Hindak 1962/38	annotated	Species	Bacteria; Cyanobacteria; Chroococcidiopsidales; Chroococcidiopsidaceae; Chroococcidiopsis; unclassified Chroococcidiopsis	2646205
270	149	tr|A0A2P8QT78|A0A2P8QT78_9CYAN	2	2577	Allophycocyanin OS=Chroococcidiopsis sp. CCALA 051 OX=869949 GN=C7Y66_08825 PE=3 SV=1	869949	4	4	NA	NA	NA	A0A2P8QT78		Chroococcidiopsis sp. CCALA 051			Chroococcidiopsis sp. Hindak 1962/38	annotated	Species	Bacteria; Cyanobacteria; Chroococcidiopsidales; Chroococcidiopsidaceae; Chroococcidiopsis; unclassified Chroococcidiopsis	2646205
247	79	tr|A0A1Y0RGE7|A0A1Y0RGE7_9CYAN	2	2318	NADPH-protochlorophyllide oxidoreductase OS=Nostocales cyanobacterium HT-58-2 OX=1940762 GN=BZZ01_05175 PE=3 SV=1	1940762	3	7	NA	NA	NA	A0A1Y0RGE7		Nostocales cyanobacterium HT-58-2			Tolypothrix nodosa HT-58-2	annotated	Species	Bacteria; Cyanobacteria; Nostocales	1219117
67	81	tr|A0A1Z4GAX3|A0A1Z4GAX3_9CYAN	3	560	Phycoerythrocyanin beta chain OS=Anabaenopsis circularis NIES-21 OX=1085406 GN=pecB PE=3 SV=1	1085406	25	24	NA	6	NA	A0A1Z4GAX3		Anabaenopsis circularis NIES-21			Anabaenopsis circinalis NIES-21; Anabaenopsis circularis 'Watanabe A186'; Anabaenopsis circularis IAM M-4	annotated		Bacteria; Cyanobacteria; Nostocales; Aphanizomenonaceae; Anabaenopsis	109266
119	9	tr|A0A0B0QTB3|A0A0B0QTB3_APHF2	4	1101	Carbon dioxide-concentrating protein CcmK OS=Aphanizomenon flos-aquae (strain 2012/KM1/D3) OX=1532906 GN=OA07_12830 PE=3 SV=1	1532906	9	10	NA	NA	NA	A0A0B0QTB3	APHF2	Aphanizomenon flos-aquae (strain 2012/KM1/D3)			Aphanizomenon flos-aquae 2012-KM1-D3; Aphanizomenon flos-aquae 2012/KM/D3; Aphanizomenon flos-aquae 2012/KM1/D3	reviewed		Bacteria; Cyanobacteria; Nostocales; Aphanizomenonaceae; Aphanizomenon	1176
132	8	tr|A0A0B0QSG2|A0A0B0QSG2_APHF2	3	1249	DNA-directed RNA polymerase subunit gamma OS=Aphanizomenon flos-aquae (strain 2012/KM1/D3) OX=1532906 GN=rpoC1 PE=3 SV=1	1532906	10	8	NA	NA	NA	A0A0B0QSG2	APHF2	Aphanizomenon flos-aquae (strain 2012/KM1/D3)			Aphanizomenon flos-aquae 2012-KM1-D3; Aphanizomenon flos-aquae 2012/KM/D3; Aphanizomenon flos-aquae 2012/KM1/D3	reviewed		Bacteria; Cyanobacteria; Nostocales; Aphanizomenonaceae; Aphanizomenon	1176
121	37	tr|A0A0R0MH59|A0A0R0MH59_9CYAN	3	1142	XRE family transcriptional regulator OS=Cylindrospermopsis sp. CR12 OX=1747196 GN=ASL19_05390 PE=4 SV=1	1747196	8	12	NA	NA	NA	A0A0R0MH59		Cylindrospermopsis sp. CR12				annotated	Species	Bacteria; Cyanobacteria; Nostocales; Aphanizomenonaceae; Cylindrospermopsis; unclassified Cylindrospermopsis	2620023
98	124	tr|A0A2A2TPX3|A0A2A2TPX3_9CYAN	7	842	Fasciclin OS=Calothrix elsteri CCALA 953 OX=987040 GN=CK510_01420 PE=4 SV=1	987040	6	6	NA	NA	NA	A0A2A2TPX3		Calothrix elsteri CCALA 953			Calothrix sp. CCALA 953; Calothrix sp. CCALA953	annotated		Bacteria; Cyanobacteria; Nostocales; Calotrichaceae; Calothrix	1247191
191	499	tr|K9V9U7|K9V9U7_9CYAN	2	1917	Glutamine synthetase I beta OS=Calothrix sp. PCC 6303 OX=1170562 GN=Cal6303_5132 PE=3 SV=1	1170562	12	3	NA	NA	NA	K9V9U7		Calothrix sp. PCC 6303			Calothrix parietina 1018; Calothrix parietina SAG 1410-3; Calothrix sp. (ATCC 29156); Calothrix sp. (PCC 6303); Calothrix sp. ATCC 29156	annotated		Bacteria; Cyanobacteria; Nostocales; Calotrichaceae; Calothrix	32054
207	94	tr|A0A1Z4KC15|A0A1Z4KC15_9CYAN	2	2007	Peptidase S8/S53 OS=Calothrix brevissima NIES-22 OX=1973478 GN=NIES22_66650 PE=4 SV=1	1973478	11	3	NA	NA	NA	A0A1Z4KC15		Calothrix brevissima NIES-22				annotated		Bacteria; Cyanobacteria; Nostocales; Calotrichaceae; Calothrix	938406
278	26	tr|A0A0M0SKZ7|A0A0M0SKZ7_9CYAN	2	2746	Elongation factor Ts OS=Hapalosiphon sp. MRB220 OX=1704290 GN=tsf PE=3 SV=1	1704290	2	4	NA	NA	NA	A0A0M0SKZ7		Hapalosiphon sp. MRB220				annotated	Species	Bacteria; Cyanobacteria; Nostocales; Hapalosiphonaceae; Hapalosiphon; unclassified Hapalosiphon	2640426
216	53	tr|A0A1B7WNC1|A0A1B7WNC1_9NOST	4	2059	Translation initiation factor IF-1 OS=Anabaena sp. CRKS33 OX=1710888 GN=infA PE=3 SV=1	1710888	2	NA	NA	NA	NA	A0A1B7WNC1		Anabaena sp. CRKS33			Anabaena sp. Cheney33	annotated	Species	Bacteria; Cyanobacteria; Nostocales; Nostocaceae; Anabaena; unclassified Anabaena	2619674
253	21	tr|A0A0K2LVT4|A0A0K2LVT4_9NOST	3	2389	Peptidyl-prolyl cis-trans isomerase OS=Anabaena sp. WA102 OX=1647413 GN=AA650_05135 PE=3 SV=1	1647413	2	NA	NA	NA	NA	A0A0K2LVT4		Anabaena sp. WA102				annotated	Species	Bacteria; Cyanobacteria; Nostocales; Nostocaceae; Anabaena; unclassified Anabaena	2619674
182	101	tr|A0A1Z4QQK5|A0A1Z4QQK5_9NOST	5	1797	30S ribosomal protein S5 OS=Cylindrospermum sp. NIES-4074 OX=2005457 GN=rpsE PE=3 SV=1	2005457	4	3	NA	NA	NA	A0A1Z4QQK5		Cylindrospermum sp. NIES-4074				annotated	Species	Bacteria; Cyanobacteria; Nostocales; Nostocaceae; Cylindrospermum; unclassified Cylindrospermum	2630404
61	104	tr|A0A1Z4SCH9|A0A1Z4SCH9_9NOSO	8	519	Chaperone protein DnaK OS=Nostoc sp. NIES-4103 OX=2005458 GN=dnaK PE=2 SV=1	2005458	8	14	2	NA	NA	A0A1Z4SCH9		Nostoc sp. NIES-4103				annotated	Species	Bacteria; Cyanobacteria; Nostocales; Nostocaceae; Nostoc	2593658
87	119	tr|A0A252DTU1|A0A252DTU1_9NOSO	3	729	Phycocyanin subunit beta OS=Nostoc sp. RF31YmG OX=1932668 GN=BV378_02765 PE=3 SV=1	1932668	18	21	NA	6	NA	A0A252DTU1		Nostoc sp. RF31YmG			Nostoc sp. RF31Y	annotated	Species	Bacteria; Cyanobacteria; Nostocales; Nostocaceae; Nostoc	2593658
143	320	tr|A0A367PYT2|A0A367PYT2_9NOSO	5	1329	Nucleoside diphosphate kinase OS=Nostoc sp. ATCC 43529 OX=1840705 GN=ndk PE=3 SV=1	1840705	8	8	NA	NA	NA	A0A367PYT2		Nostoc sp. ATCC 43529			Nostoc sp. CPB 755	annotated	Species	Bacteria; Cyanobacteria; Nostocales; Nostocaceae; Nostoc	2593658
156	28	tr|A0A0M4SHD6|A0A0M4SHD6_9NOSO	5	1491	Nucleoside diphosphate kinase OS=Nostoc piscinale CENA21 OX=224013 GN=ndk PE=3 SV=1	224013	11	2	NA	NA	NA	A0A0M4SHD6		Nostoc piscinale CENA21				annotated		Bacteria; Cyanobacteria; Nostocales; Nostocaceae; Nostoc	224012
205	27	tr|A0A0M3V6N3|A0A0M3V6N3_9NOSO	4	2004	ATP synthase gamma chain OS=Nostoc piscinale CENA21 OX=224013 GN=atpG PE=3 SV=1	224013	4	2	3	NA	4	A0A0M3V6N3		Nostoc piscinale CENA21				annotated		Bacteria; Cyanobacteria; Nostocales; Nostocaceae; Nostoc	224012
246	103	tr|A0A1Z4SA29|A0A1Z4SA29_9NOSO	3	2309	Phycobilisome linker polypeptide OS=Nostoc sp. NIES-4103 OX=2005458 GN=NIES4103_42320 PE=3 SV=1	2005458	3	4	NA	4	NA	A0A1Z4SA29		Nostoc sp. NIES-4103				annotated	Species	Bacteria; Cyanobacteria; Nostocales; Nostocaceae; Nostoc	2593658
274	96	tr|A0A1Z4KZX7|A0A1Z4KZX7_NOSLI	2	2654	Glutaredoxin family protein OS=Nostoc linckia NIES-25 OX=1091006 GN=NIES25_09950 PE=4 SV=1	1091006	3	NA	5	NA	NA	A0A1Z4KZX7		Nostoc linckia NIES-25				annotated		Bacteria; Cyanobacteria; Nostocales; Nostocaceae; Nostoc	92942
73	450	tr|D7DYQ8|D7DYQ8_NOSA0	2	623	Phycocyanin OS=Nostoc azollae (strain 0708) OX=551115 GN=Aazo_0296 PE=3 SV=1	551115	24	27	NA	NA	NA	D7DYQ8	NOSA0	Nostoc azollae (strain 0708)		Anabaena azollae (strain 0708)	'Nostoc azollae' 0708; Anabaena azollae 0708; Nostoc azollae 0708	annotated		Bacteria; Cyanobacteria; Nostocales; Nostocaceae; Trichormus	1164
18	481	tr|K9RJ43|K9RJ43_9CYAN	11	228	Secreted/surface protein with fasciclin-like repeats OS=Rivularia sp. PCC 7116 OX=373994 GN=Riv7116_5095 PE=4 SV=1	373994	12	12	14	4	7	K9RJ43		Rivularia sp. PCC 7116			Calothrix sp. ATCC 29111; Calothrix sp. PCC 7116; Rivularia sp. LIP	annotated	Species	Bacteria; Cyanobacteria; Nostocales; Rivulariaceae; Rivularia; unclassified Rivularia (in: Bacteria)	2676603
241	11	tr|A0A0C2MBX4|A0A0C2MBX4_9CYAN	3	2271	Bicarbonate-binding protein OS=Scytonema tolypothrichoides VB-61278 OX=1233231 GN=SD80_06765 PE=3 SV=1	1233231	NA	3	NA	NA	NA	A0A0C2MBX4		Scytonema tolypothrichoides VB-61278				annotated		Bacteria; Cyanobacteria; Nostocales; Scytonemataceae; Scytonema	1233230
257	86	tr|A0A1Z4J4K7|A0A1Z4J4K7_9CYAN	2	2410	Transketolase OS=Scytonema sp. HK-05 OX=1137095 GN=SAMD00079811_68340 PE=3 SV=1	1137095	7	3	NA	NA	NA	A0A1Z4J4K7		Scytonema sp. HK-05			Scytonema sp. IAM M-291; Scytonema sp. NIES-2130	annotated	Species	Bacteria; Cyanobacteria; Nostocales; Scytonemataceae; Scytonema; unclassified Scytonema	2618749
154	114	tr|A0A218QJR2|A0A218QJR2_9CYAN	4	1477	Photosystem I reaction center subunit II OS=Tolypothrix sp. NIES-4075 OX=2005459 GN=NIES4075_30040 PE=3 SV=1	2005459	8	7	NA	NA	NA	A0A218QJR2		Tolypothrix sp. NIES-4075				annotated	Species	Bacteria; Cyanobacteria; Nostocales; Tolypothrichaceae; Tolypothrix; unclassified Tolypothrix	2649714
24	372	tr|A0A5B8NLT6|A0A5B8NLT6_9CHRO	9	272	60 kDa chaperonin OS=Euhalothece natronophila Z-M001 OX=522448 GN=groL PE=3 SV=1	522448	22	24	5	2	NA	A0A5B8NLT6		Euhalothece natronophila Z-M001			Euhalothece sp. Z-M001	annotated		Bacteria; Cyanobacteria; Oscillatoriophycideae; Chroococcales; Aphanothecaceae; Halothece cluster; Euhalothece	577489
32	75	tr|A0A1U7HV10|A0A1U7HV10_9CHRO	4	320	Phycocyanin subunit beta OS=Chroogloeocystis siderophila 5.2 s.c.1 OX=247279 GN=NIES1031_09065 PE=3 SV=1	247279	42	38	NA	4	19	A0A1U7HV10		Chroogloeocystis siderophila 5.2 s.c.1			Chroogloeocystis siderophila NIES-1031; cyanobacterium 5.2 s.c. 1; cyanobacterium 5.2 s.c.1; unidentified bacterium ATCC BAA-845	annotated		Bacteria; Cyanobacteria; Oscillatoriophycideae; Chroococcales; Chroococcaceae; Chroogloeocystis	329163
120	76	tr|A0A1U7HZN4|A0A1U7HZN4_9CHRO	7	1133	Carbon dioxide-concentrating protein CcmK OS=Chroogloeocystis siderophila 5.2 s.c.1 OX=247279 GN=NIES1031_00490 PE=3 SV=1	247279	5	3	3	NA	NA	A0A1U7HZN4		Chroogloeocystis siderophila 5.2 s.c.1			Chroogloeocystis siderophila NIES-1031; cyanobacterium 5.2 s.c. 1; cyanobacterium 5.2 s.c.1; unidentified bacterium ATCC BAA-845	annotated		Bacteria; Cyanobacteria; Oscillatoriophycideae; Chroococcales; Chroococcaceae; Chroogloeocystis	329163
148	74	tr|A0A1U7HAQ7|A0A1U7HAQ7_9CHRO	5	1400	ATP-dependent zinc metalloprotease FtsH OS=Chroogloeocystis siderophila 5.2 s.c.1 OX=247279 GN=ftsH PE=3 SV=1	247279	7	5	4	2	2	A0A1U7HAQ7		Chroogloeocystis siderophila 5.2 s.c.1			Chroogloeocystis siderophila NIES-1031; cyanobacterium 5.2 s.c. 1; cyanobacterium 5.2 s.c.1; unidentified bacterium ATCC BAA-845	annotated		Bacteria; Cyanobacteria; Oscillatoriophycideae; Chroococcales; Chroococcaceae; Chroogloeocystis	329163
55	414	tr|A0A6N8FTJ0|A0A6N8FTJ0_9CHRO	2	460	Phycocyanin subunit alpha OS=Gloeocapsopsis sp. AAB1 = 1H9 OX=1433147 GN=BWI75_06850 PE=3 SV=1	1433147	23	44	NA	NA	NA	A0A6N8FTJ0		Gloeocapsopsis sp. AAB1 = 1H9			Gloeocapsopsis sp. 1H9; Gloeocapsopsis sp. 1H9 = AAB1; Gloeocapsopsis sp. AAB1; Gloeocapsopsis sp. CCMEE 7001	annotated	Species	Bacteria; Cyanobacteria; Oscillatoriophycideae; Chroococcales; Chroococcaceae; Gloeocapsopsis; unclassified Gloeocapsopsis	2631915
221	17	tr|A0A0F6RNY4|A0A0F6RNY4_MICAE	2	2117	Phycocyanin beta chain OS=Microcystis aeruginosa NIES-2549 OX=1641812 GN=MYAER_4261 PE=3 SV=1	1641812	7	5	NA	NA	NA	A0A0F6RNY4		Microcystis aeruginosa NIES-2549				annotated		Bacteria; Cyanobacteria; Oscillatoriophycideae; Chroococcales; Microcystaceae; Microcystis	1126
281	484	tr|K9SA05|K9SA05_9CYAN	2	2760	Argininosuccinate synthase OS=Geitlerinema sp. PCC 7407 OX=1173025 GN=argG PE=3 SV=1	1173025	NA	4	NA	NA	NA	K9SA05		Geitlerinema sp. PCC 7407			Geitlerinema sp. ATCC 29126; Geitlerinema sp. CPCC 99	annotated	Species	Bacteria; Cyanobacteria; Oscillatoriophycideae; Oscillatoriales; Coleofasciculaceae; Geitlerinema; unclassified Geitlerinema	2648775
39	507	tr|K9VTC0|K9VTC0_9CYAN	10	351	ATPase AAA-2 domain protein OS=Crinalium epipsammum PCC 9333 OX=1173022 GN=Cri9333_0177 PE=3 SV=1	1173022	33	15	3	8	10	K9VTC0		Crinalium epipsammum PCC 9333			Crinalium sp. PCC 9333	annotated		Bacteria; Cyanobacteria; Oscillatoriophycideae; Oscillatoriales; Gomontiellaceae; Crinalium	241425
54	512	tr|K9VWJ1|K9VWJ1_9CYAN	6	457	60 kDa chaperonin OS=Crinalium epipsammum PCC 9333 OX=1173022 GN=groL PE=3 SV=1	1173022	33	19	NA	NA	NA	K9VWJ1		Crinalium epipsammum PCC 9333			Crinalium sp. PCC 9333	annotated		Bacteria; Cyanobacteria; Oscillatoriophycideae; Oscillatoriales; Gomontiellaceae; Crinalium	241425
57	519	tr|K9VXY4|K9VXY4_9CYAN	7	504	ATP synthase subunit alpha OS=Crinalium epipsammum PCC 9333 OX=1173022 GN=atpA PE=3 SV=1	1173022	23	11	11	NA	NA	K9VXY4		Crinalium epipsammum PCC 9333			Crinalium sp. PCC 9333	annotated		Bacteria; Cyanobacteria; Oscillatoriophycideae; Oscillatoriales; Gomontiellaceae; Crinalium	241425
95	535	tr|K9W3R6|K9W3R6_9CYAN	2	811	Alkyl hydroperoxide reductase/ Thiol specific antioxidant/ Mal allergen OS=Crinalium epipsammum PCC 9333 OX=1173022 GN=Cri9333_4046 PE=4 SV=1	1173022	23	17	NA	NA	NA	K9W3R6		Crinalium epipsammum PCC 9333			Crinalium sp. PCC 9333	annotated		Bacteria; Cyanobacteria; Oscillatoriophycideae; Oscillatoriales; Gomontiellaceae; Crinalium	241425
96	522	tr|K9VY82|K9VY82_9CYAN	3	824	Microcompartments protein OS=Crinalium epipsammum PCC 9333 OX=1173022 GN=Cri9333_1587 PE=3 SV=1	1173022	13	13	12	NA	NA	K9VY82		Crinalium epipsammum PCC 9333			Crinalium sp. PCC 9333	annotated		Bacteria; Cyanobacteria; Oscillatoriophycideae; Oscillatoriales; Gomontiellaceae; Crinalium	241425
105	515	tr|K9VXH7|K9VXH7_9CYAN	2	920	Phycobiliprotein ApcE OS=Crinalium epipsammum PCC 9333 OX=1173022 GN=Cri9333_1937 PE=3 SV=1	1173022	29	5	NA	NA	NA	K9VXH7		Crinalium epipsammum PCC 9333			Crinalium sp. PCC 9333	annotated		Bacteria; Cyanobacteria; Oscillatoriophycideae; Oscillatoriales; Gomontiellaceae; Crinalium	241425
107	509	tr|K9VVC5|K9VVC5_9CYAN	3	954	Ferritin Dps family protein OS=Crinalium epipsammum PCC 9333 OX=1173022 GN=Cri9333_0110 PE=3 SV=1	1173022	12	15	NA	NA	NA	K9VVC5		Crinalium epipsammum PCC 9333			Crinalium sp. PCC 9333	annotated		Bacteria; Cyanobacteria; Oscillatoriophycideae; Oscillatoriales; Gomontiellaceae; Crinalium	241425
112	510	tr|K9VVF0|K9VVF0_9CYAN	3	1024	Fructose-1 6-bisphosphate aldolase OS=Crinalium epipsammum PCC 9333 OX=1173022 GN=Cri9333_1042 PE=3 SV=1	1173022	17	13	NA	NA	NA	K9VVF0		Crinalium epipsammum PCC 9333			Crinalium sp. PCC 9333	annotated		Bacteria; Cyanobacteria; Oscillatoriophycideae; Oscillatoriales; Gomontiellaceae; Crinalium	241425
114	531	tr|K9W1H0|K9W1H0_9CYAN	6	1041	RNP-1 like RNA-binding protein OS=Crinalium epipsammum PCC 9333 OX=1173022 GN=Cri9333_2725 PE=4 SV=1	1173022	9	6	NA	NA	NA	K9W1H0		Crinalium epipsammum PCC 9333			Crinalium sp. PCC 9333	annotated		Bacteria; Cyanobacteria; Oscillatoriophycideae; Oscillatoriales; Gomontiellaceae; Crinalium	241425
122	514	tr|K9VXH0|K9VXH0_9CYAN	3	1170	10 kDa chaperonin OS=Crinalium epipsammum PCC 9333 OX=1173022 GN=groS PE=3 SV=1	1173022	15	7	NA	6	NA	K9VXH0		Crinalium epipsammum PCC 9333			Crinalium sp. PCC 9333	annotated		Bacteria; Cyanobacteria; Oscillatoriophycideae; Oscillatoriales; Gomontiellaceae; Crinalium	241425
123	528	tr|K9W095|K9W095_9CYAN	5	1173	DNA-directed RNA polymerase subunit alpha OS=Crinalium epipsammum PCC 9333 OX=1173022 GN=rpoA PE=3 SV=1	1173022	10	5	NA	NA	NA	K9W095		Crinalium epipsammum PCC 9333			Crinalium sp. PCC 9333	annotated		Bacteria; Cyanobacteria; Oscillatoriophycideae; Oscillatoriales; Gomontiellaceae; Crinalium	241425
142	527	tr|K9W094|K9W094_9CYAN	3	1323	Glyceraldehyde-3-phosphate dehydrogenase OS=Crinalium epipsammum PCC 9333 OX=1173022 GN=Cri9333_2336 PE=3 SV=1	1173022	16	6	NA	NA	NA	K9W094		Crinalium epipsammum PCC 9333			Crinalium sp. PCC 9333	annotated		Bacteria; Cyanobacteria; Oscillatoriophycideae; Oscillatoriales; Gomontiellaceae; Crinalium	241425
149	524	tr|K9VZI6|K9VZI6_9CYAN	3	1406	Photosystem I P700 chlorophyll a apoprotein A1 OS=Crinalium epipsammum PCC 9333 OX=1173022 GN=psaA PE=3 SV=1	1173022	12	8	NA	NA	NA	K9VZI6		Crinalium epipsammum PCC 9333			Crinalium sp. PCC 9333	annotated		Bacteria; Cyanobacteria; Oscillatoriophycideae; Oscillatoriales; Gomontiellaceae; Crinalium	241425
151	539	tr|K9W6E6|K9W6E6_9CYAN	2	1419	Uncharacterized protein OS=Crinalium epipsammum PCC 9333 OX=1173022 GN=Cri9333_4552 PE=4 SV=1	1173022	12	11	NA	NA	NA	K9W6E6		Crinalium epipsammum PCC 9333			Crinalium sp. PCC 9333	annotated		Bacteria; Cyanobacteria; Oscillatoriophycideae; Oscillatoriales; Gomontiellaceae; Crinalium	241425
162	513	tr|K9VXC7|K9VXC7_9CYAN	2	1589	Superoxide dismutase OS=Crinalium epipsammum PCC 9333 OX=1173022 GN=Cri9333_1305 PE=3 SV=1	1173022	12	6	NA	NA	NA	K9VXC7		Crinalium epipsammum PCC 9333			Crinalium sp. PCC 9333	annotated		Bacteria; Cyanobacteria; Oscillatoriophycideae; Oscillatoriales; Gomontiellaceae; Crinalium	241425
170	533	tr|K9W2L9|K9W2L9_9CYAN	2	1666	17 kDa surface antigen OS=Crinalium epipsammum PCC 9333 OX=1173022 GN=Cri9333_3169 PE=4 SV=1	1173022	15	4	NA	NA	NA	K9W2L9		Crinalium epipsammum PCC 9333			Crinalium sp. PCC 9333	annotated		Bacteria; Cyanobacteria; Oscillatoriophycideae; Oscillatoriales; Gomontiellaceae; Crinalium	241425
171	506	tr|K9VSN3|K9VSN3_9CYAN	2	1675	Orange carotenoid-binding protein OS=Crinalium epipsammum PCC 9333 OX=1173022 GN=Cri9333_0045 PE=3 SV=1	1173022	10	8	NA	NA	NA	K9VSN3		Crinalium epipsammum PCC 9333			Crinalium sp. PCC 9333	annotated		Bacteria; Cyanobacteria; Oscillatoriophycideae; Oscillatoriales; Gomontiellaceae; Crinalium	241425
172	530	tr|K9W0X8|K9W0X8_9CYAN	3	1677	Urea-binding protein OS=Crinalium epipsammum PCC 9333 OX=1173022 GN=Cri9333_2546 PE=4 SV=1	1173022	9	3	NA	NA	NA	K9W0X8		Crinalium epipsammum PCC 9333			Crinalium sp. PCC 9333	annotated		Bacteria; Cyanobacteria; Oscillatoriophycideae; Oscillatoriales; Gomontiellaceae; Crinalium	241425
173	538	tr|K9W5Y7|K9W5Y7_9CYAN	3	1678	Rhodanese-like protein OS=Crinalium epipsammum PCC 9333 OX=1173022 GN=Cri9333_4426 PE=4 SV=1	1173022	13	4	NA	NA	NA	K9W5Y7		Crinalium epipsammum PCC 9333			Crinalium sp. PCC 9333	annotated		Bacteria; Cyanobacteria; Oscillatoriophycideae; Oscillatoriales; Gomontiellaceae; Crinalium	241425
175	521	tr|K9VY78|K9VY78_9CYAN	3	1732	Enolase OS=Crinalium epipsammum PCC 9333 OX=1173022 GN=eno PE=3 SV=1	1173022	7	8	NA	NA	NA	K9VY78		Crinalium epipsammum PCC 9333			Crinalium sp. PCC 9333	annotated		Bacteria; Cyanobacteria; Oscillatoriophycideae; Oscillatoriales; Gomontiellaceae; Crinalium	241425
178	532	tr|K9W2I2|K9W2I2_9CYAN	5	1751	Anti-sigma factor antagonist OS=Crinalium epipsammum PCC 9333 OX=1173022 GN=Cri9333_3134 PE=3 SV=1	1173022	3	2	NA	NA	NA	K9W2I2		Crinalium epipsammum PCC 9333			Crinalium sp. PCC 9333	annotated		Bacteria; Cyanobacteria; Oscillatoriophycideae; Oscillatoriales; Gomontiellaceae; Crinalium	241425
181	525	tr|K9VZS5|K9VZS5_9CYAN	4	1790	Cysteine synthase OS=Crinalium epipsammum PCC 9333 OX=1173022 GN=Cri9333_1780 PE=3 SV=1	1173022	9	4	NA	NA	NA	K9VZS5		Crinalium epipsammum PCC 9333			Crinalium sp. PCC 9333	annotated		Bacteria; Cyanobacteria; Oscillatoriophycideae; Oscillatoriales; Gomontiellaceae; Crinalium	241425
183	516	tr|K9VXL9|K9VXL9_9CYAN	2	1841	D-3-phosphoglycerate dehydrogenase OS=Crinalium epipsammum PCC 9333 OX=1173022 GN=Cri9333_1821 PE=3 SV=1	1173022	9	4	NA	NA	NA	K9VXL9		Crinalium epipsammum PCC 9333			Crinalium sp. PCC 9333	annotated		Bacteria; Cyanobacteria; Oscillatoriophycideae; Oscillatoriales; Gomontiellaceae; Crinalium	241425
202	520	tr|K9VY19|K9VY19_9CYAN	3	1978	Translation initiation factor IF-2 OS=Crinalium epipsammum PCC 9333 OX=1173022 GN=infB PE=3 SV=1	1173022	7	3	2	NA	NA	K9VY19		Crinalium epipsammum PCC 9333			Crinalium sp. PCC 9333	annotated		Bacteria; Cyanobacteria; Oscillatoriophycideae; Oscillatoriales; Gomontiellaceae; Crinalium	241425
218	508	tr|K9VUT6|K9VUT6_9CYAN	2	2110	Orange carotenoid-binding protein OS=Crinalium epipsammum PCC 9333 OX=1173022 GN=Cri9333_0797 PE=3 SV=1	1173022	6	7	NA	NA	NA	K9VUT6		Crinalium epipsammum PCC 9333			Crinalium sp. PCC 9333	annotated		Bacteria; Cyanobacteria; Oscillatoriophycideae; Oscillatoriales; Gomontiellaceae; Crinalium	241425
224	529	tr|K9W0M2|K9W0M2_9CYAN	2	2142	Transcriptional regulator AbrB family OS=Crinalium epipsammum PCC 9333 OX=1173022 GN=Cri9333_2472 PE=4 SV=1	1173022	9	3	NA	NA	NA	K9W0M2		Crinalium epipsammum PCC 9333			Crinalium sp. PCC 9333	annotated		Bacteria; Cyanobacteria; Oscillatoriophycideae; Oscillatoriales; Gomontiellaceae; Crinalium	241425
226	536	tr|K9W3S1|K9W3S1_9CYAN	2	2152	Photosystem II manganese-stabilizing polypeptide OS=Crinalium epipsammum PCC 9333 OX=1173022 GN=Cri9333_3232 PE=3 SV=1	1173022	10	3	NA	NA	NA	K9W3S1		Crinalium epipsammum PCC 9333			Crinalium sp. PCC 9333	annotated		Bacteria; Cyanobacteria; Oscillatoriophycideae; Oscillatoriales; Gomontiellaceae; Crinalium	241425
230	518	tr|K9VXV3|K9VXV3_9CYAN	2	2202	Adenosylhomocysteinase OS=Crinalium epipsammum PCC 9333 OX=1173022 GN=ahcY PE=3 SV=1	1173022	4	8	NA	NA	NA	K9VXV3		Crinalium epipsammum PCC 9333			Crinalium sp. PCC 9333	annotated		Bacteria; Cyanobacteria; Oscillatoriophycideae; Oscillatoriales; Gomontiellaceae; Crinalium	241425
237	534	tr|K9W333|K9W333_9CYAN	2	2235	Two component transcriptional regulator LuxR family OS=Crinalium epipsammum PCC 9333 OX=1173022 GN=Cri9333_3370 PE=4 SV=1	1173022	7	3	NA	NA	NA	K9W333		Crinalium epipsammum PCC 9333			Crinalium sp. PCC 9333	annotated		Bacteria; Cyanobacteria; Oscillatoriophycideae; Oscillatoriales; Gomontiellaceae; Crinalium	241425
248	526	tr|K9W058|K9W058_9CYAN	3	2325	50S ribosomal protein L15 OS=Crinalium epipsammum PCC 9333 OX=1173022 GN=rplO PE=3 SV=1	1173022	5	NA	NA	NA	NA	K9W058		Crinalium epipsammum PCC 9333			Crinalium sp. PCC 9333	annotated		Bacteria; Cyanobacteria; Oscillatoriophycideae; Oscillatoriales; Gomontiellaceae; Crinalium	241425
255	517	tr|K9VXM5|K9VXM5_9CYAN	3	2403	Photosystem I reaction center subunit II OS=Crinalium epipsammum PCC 9333 OX=1173022 GN=Cri9333_1826 PE=3 SV=1	1173022	3	NA	NA	NA	NA	K9VXM5		Crinalium epipsammum PCC 9333			Crinalium sp. PCC 9333	annotated		Bacteria; Cyanobacteria; Oscillatoriophycideae; Oscillatoriales; Gomontiellaceae; Crinalium	241425
273	537	tr|K9W427|K9W427_9CYAN	2	2627	Catalase OS=Crinalium epipsammum PCC 9333 OX=1173022 GN=Cri9333_4317 PE=3 SV=1	1173022	2	6	NA	NA	NA	K9W427		Crinalium epipsammum PCC 9333			Crinalium sp. PCC 9333	annotated		Bacteria; Cyanobacteria; Oscillatoriophycideae; Oscillatoriales; Gomontiellaceae; Crinalium	241425
290	511	tr|K9VVG4|K9VVG4_9CYAN	2	2909	Uncharacterized protein OS=Crinalium epipsammum PCC 9333 OX=1173022 GN=Cri9333_1179 PE=4 SV=1	1173022	3	2	NA	NA	NA	K9VVG4		Crinalium epipsammum PCC 9333			Crinalium sp. PCC 9333	annotated		Bacteria; Cyanobacteria; Oscillatoriophycideae; Oscillatoriales; Gomontiellaceae; Crinalium	241425
72	380	tr|A0A5Q4HBV4|A0A5Q4HBV4_9CYAN	5	585	ATP synthase subunit beta OS=Arthrospira sp. PLM2.Bin9 OX=2599626 GN=atpD PE=3 SV=1	2599626	11	24	2	6	NA	A0A5Q4HBV4		Arthrospira sp. PLM2.Bin9				annotated	Species	Bacteria; Cyanobacteria; Oscillatoriophycideae; Oscillatoriales; Microcoleaceae; Arthrospira; unclassified Arthrospira	2638140
244	451	tr|D8G191|D8G191_9CYAN	3	2294	D-3-phosphoglycerate dehydrogenase OS=Kamptonema sp. PCC 6506 OX=272129 GN=OSCI_3000034 PE=3 SV=1	272129	4	5	2	NA	NA	D8G191		Kamptonema sp. PCC 6506			Lyngbya kuetzingii UTEX 'B 1547'; Lyngbya kuetzingii UTEX 1547; Oscillatoria sp. ATCC 29081 [dec.]; Oscillatoria sp. PCC 6506; Oscillatoria sp. PCC 9029; Oscillatoria sp. PCC 9029 = Lyngbya kuetzingii UTEX B 1547; [Oscillatoria] sp. PCC 6506	annotated	Species	Bacteria; Cyanobacteria; Oscillatoriophycideae; Oscillatoriales; Microcoleaceae; Kamptonema	1501433
37	456	tr|F5UCR3|F5UCR3_9CYAN	8	343	ATP synthase subunit alpha OS=Microcoleus vaginatus FGP-2 OX=756067 GN=atpA PE=3 SV=1	756067	29	8	22	NA	NA	F5UCR3		Microcoleus vaginatus FGP-2				annotated		Bacteria; Cyanobacteria; Oscillatoriophycideae; Oscillatoriales; Microcoleaceae; Microcoleus	119532
161	464	tr|F5UP33|F5UP33_9CYAN	4	1543	Photosystem II CP47 reaction center protein OS=Microcoleus vaginatus FGP-2 OX=756067 GN=psbB PE=3 SV=1	756067	6	NA	2	NA	NA	F5UP33		Microcoleus vaginatus FGP-2				annotated		Bacteria; Cyanobacteria; Oscillatoriophycideae; Oscillatoriales; Microcoleaceae; Microcoleus	119532
167	461	tr|F5UK64|F5UK64_9CYAN	2	1623	Uncharacterized protein OS=Microcoleus vaginatus FGP-2 OX=756067 GN=MicvaDRAFT_2491 PE=4 SV=1	756067	14	3	NA	NA	NA	F5UK64		Microcoleus vaginatus FGP-2				annotated		Bacteria; Cyanobacteria; Oscillatoriophycideae; Oscillatoriales; Microcoleaceae; Microcoleus	119532
297	458	tr|F5UED8|F5UED8_9CYAN	2	3179	Glutaredoxin domain protein region OS=Microcoleus vaginatus FGP-2 OX=756067 GN=MicvaDRAFT_1970 PE=4 SV=1	756067	2	NA	2	NA	NA	F5UED8		Microcoleus vaginatus FGP-2				annotated		Bacteria; Cyanobacteria; Oscillatoriophycideae; Oscillatoriales; Microcoleaceae; Microcoleus	119532
268	540	tr|K9WGY9|K9WGY9_9CYAN	2	2534	Uncharacterized protein OS=Microcoleus sp. PCC 7113 OX=1173027 GN=Mic7113_3749 PE=4 SV=1	1173027	7	2	NA	NA	NA	K9WGY9		Microcoleus sp. PCC 7113			Allocoleopsis franciscanus PCC 7113; Oscillatoria sp. Mc	annotated	Species	Bacteria; Cyanobacteria; Oscillatoriophycideae; Oscillatoriales; Microcoleaceae; Microcoleus; unclassified Microcoleus	2642155
286	67	tr|A0A1J1LRW1|A0A1J1LRW1_9CYAN	3	2845	UDP-glucuronate decarboxylase OS=Planktothrix tepida PCC 9214 OX=671072 GN=PL9214650381 PE=3 SV=1	671072	2	2	NA	NA	NA	A0A1J1LRW1		Planktothrix tepida PCC 9214			Oscillatoria sp. 4d.1; Oscillatoria sp. PCC 9214; Planktothrix sp. PCC 9214; Planktothrix tepida NIES-2870	annotated		Bacteria; Cyanobacteria; Oscillatoriophycideae; Oscillatoriales; Microcoleaceae; Planktothrix	1678309
296	6	tr|A0A073CTD6|A0A073CTD6_PLAAG	2	3048	RbcR OS=Planktothrix agardhii NIVA-CYA 126/8 OX=388467 GN=rbcR PE=3 SV=1	388467	2	2	NA	NA	NA	A0A073CTD6		Planktothrix agardhii NIVA-CYA 126/8				annotated		Bacteria; Cyanobacteria; Oscillatoriophycideae; Oscillatoriales; Microcoleaceae; Planktothrix	1160
215	404	tr|A0A6M0ETC3|A0A6M0ETC3_9CYAN	2	2056	AbrB family transcriptional regulator OS=Symploca sp. SIO2B6 OX=2607785 GN=F6K16_13585 PE=4 SV=1	2607785	6	8	NA	NA	NA	A0A6M0ETC3		Symploca sp. SIO2B6				annotated	Species	Bacteria; Cyanobacteria; Oscillatoriophycideae; Oscillatoriales; Microcoleaceae; Symploca; unclassified Symploca	2620434
222	384	tr|A0A6B3NQ99|A0A6B3NQ99_9CYAN	2	2130	Iron uptake porin OS=Symploca sp. SIO1C4 OX=2607765 GN=F6J89_28275 PE=3 SV=1	2607765	4	9	NA	NA	NA	A0A6B3NQ99		Symploca sp. SIO1C4				annotated	Species	Bacteria; Cyanobacteria; Oscillatoriophycideae; Oscillatoriales; Microcoleaceae; Symploca; unclassified Symploca	2620434
25	131	tr|A0A2G4F282|A0A2G4F282_9CYAN	4	280	Bleomycin hydrolase OS=Tychonema bourrellyi FEM_GT703 OX=2040638 GN=CP500_008440 PE=3 SV=1	2040638	74	15	21	6	NA	A0A2G4F282		Tychonema bourrellyi FEM_GT703				annotated		Bacteria; Cyanobacteria; Oscillatoriophycideae; Oscillatoriales; Microcoleaceae; Tychonema	54313
49	132	tr|A0A2G4F432|A0A2G4F432_9CYAN	8	413	Chaperone protein DnaK OS=Tychonema bourrellyi FEM_GT703 OX=2040638 GN=dnaK PE=2 SV=1	2040638	20	18	5	NA	NA	A0A2G4F432		Tychonema bourrellyi FEM_GT703				annotated		Bacteria; Cyanobacteria; Oscillatoriophycideae; Oscillatoriales; Microcoleaceae; Tychonema	54313
52	130	tr|A0A2G4F274|A0A2G4F274_9CYAN	9	430	Porin OS=Tychonema bourrellyi FEM_GT703 OX=2040638 GN=CP500_008415 PE=3 SV=1	2040638	8	3	7	2	NA	A0A2G4F274		Tychonema bourrellyi FEM_GT703				annotated		Bacteria; Cyanobacteria; Oscillatoriophycideae; Oscillatoriales; Microcoleaceae; Tychonema	54313
71	128	tr|A0A2G4EYE5|A0A2G4EYE5_9CYAN	8	582	30S ribosomal protein S1 OS=Tychonema bourrellyi FEM_GT703 OX=2040638 GN=CP500_015965 PE=4 SV=1	2040638	19	11	2	7	NA	A0A2G4EYE5		Tychonema bourrellyi FEM_GT703				annotated		Bacteria; Cyanobacteria; Oscillatoriophycideae; Oscillatoriales; Microcoleaceae; Tychonema	54313
76	127	tr|A0A2G4EYB1|A0A2G4EYB1_9CYAN	8	660	Ribulose bisphosphate carboxylase large chain OS=Tychonema bourrellyi FEM_GT703 OX=2040638 GN=rbcL PE=3 SV=1	2040638	13	7	10	5	3	A0A2G4EYB1		Tychonema bourrellyi FEM_GT703				annotated		Bacteria; Cyanobacteria; Oscillatoriophycideae; Oscillatoriales; Microcoleaceae; Tychonema	54313
93	126	tr|A0A2G4EV59|A0A2G4EV59_9CYAN	7	794	Beta-Ig-H3/fasciclin OS=Tychonema bourrellyi FEM_GT703 OX=2040638 GN=CP500_021865 PE=4 SV=1	2040638	6	NA	2	NA	NA	A0A2G4EV59		Tychonema bourrellyi FEM_GT703				annotated		Bacteria; Cyanobacteria; Oscillatoriophycideae; Oscillatoriales; Microcoleaceae; Tychonema	54313
219	133	tr|A0A2G4F618|A0A2G4F618_9CYAN	2	2111	50S ribosomal protein L15 OS=Tychonema bourrellyi FEM_GT703 OX=2040638 GN=rplO PE=3 SV=1	2040638	10	NA	3	NA	NA	A0A2G4F618		Tychonema bourrellyi FEM_GT703				annotated		Bacteria; Cyanobacteria; Oscillatoriophycideae; Oscillatoriales; Microcoleaceae; Tychonema	54313
227	134	tr|A0A2G4F675|A0A2G4F675_9CYAN	2	2162	Phycobiliprotein ApcE OS=Tychonema bourrellyi FEM_GT703 OX=2040638 GN=CP500_002560 PE=3 SV=1	2040638	7	NA	5	NA	NA	A0A2G4F675		Tychonema bourrellyi FEM_GT703				annotated		Bacteria; Cyanobacteria; Oscillatoriophycideae; Oscillatoriales; Microcoleaceae; Tychonema	54313
249	129	tr|A0A2G4F0E3|A0A2G4F0E3_9CYAN	3	2332	Superoxide dismutase OS=Tychonema bourrellyi FEM_GT703 OX=2040638 GN=CP500_011895 PE=3 SV=1	2040638	4	2	4	NA	NA	A0A2G4F0E3		Tychonema bourrellyi FEM_GT703				annotated		Bacteria; Cyanobacteria; Oscillatoriophycideae; Oscillatoriales; Microcoleaceae; Tychonema	54313
94	316	tr|A0A349JQJ6|A0A349JQJ6_9CYAN	3	798	Phycocyanin subunit beta OS=Microcoleaceae bacterium UBA11344 OX=2055792 GN=DCS91_23155 PE=3 SV=1	2055792	13	10	18	NA	NA	A0A349JQJ6		Microcoleaceae bacterium UBA11344				annotated	Species	Bacteria; Cyanobacteria; Oscillatoriophycideae; Oscillatoriales; Microcoleaceae; unclassified Microcoleaceae	2053578
30	559	tr|U7QGP0|U7QGP0_9CYAN	9	315	Allophycocyanin beta subunit OS=Lyngbya aestuarii BL J OX=1348334 GN=M595_2924 PE=3 SV=1	1348334	28	27	NA	8	21	U7QGP0		Lyngbya aestuarii BL J				annotated		Bacteria; Cyanobacteria; Oscillatoriophycideae; Oscillatoriales; Oscillatoriaceae; Lyngbya	118322
155	439	tr|A0YYK0|A0YYK0_LYNSP	2	1487	10 kDa chaperonin OS=Lyngbya sp. (strain PCC 8106) OX=313612 GN=groS PE=3 SV=1	313612	7	15	NA	NA	NA	A0YYK0	LYNSP	Lyngbya sp. (strain PCC 8106)		Lyngbya aestuarii (strain CCY9616)	Lyngbya aestuarii CCY9616; Lyngbya sp. CCY 9616; Lyngbya sp. CCY9616; Lyngbya sp. PCC 8106	annotated	Species	Bacteria; Cyanobacteria; Oscillatoriophycideae; Oscillatoriales; Oscillatoriaceae; Lyngbya; unclassified Lyngbya	2619512
266	57	tr|A0A1D8TWI7|A0A1D8TWI7_9CYAN	2	2520	Glutathione S-transferase OS=Moorea producens PAL-8-15-08-1 OX=1458985 GN=BJP34_23620 PE=3 SV=1	1458985	4	5	NA	NA	NA	A0A1D8TWI7		Moorea producens PAL-8-15-08-1				annotated		Bacteria; Cyanobacteria; Oscillatoriophycideae; Oscillatoriales; Oscillatoriaceae; Moorea	1155739
287	406	tr|A0A6M0FE14|A0A6M0FE14_9CYAN	2	2846	6-phosphogluconate dehydrogenase decarboxylating OS=Okeania sp. SIO1I7 OX=2607772 GN=gnd PE=3 SV=1	2607772	3	3	NA	NA	NA	A0A6M0FE14		Okeania sp. SIO1I7				annotated	Species	Bacteria; Cyanobacteria; Oscillatoriophycideae; Oscillatoriales; Oscillatoriaceae; Okeania; unclassified Okeania	2634635
44	500	tr|K9VEZ1|K9VEZ1_9CYAN	9	389	Cyanobacterial porin OS=Oscillatoria nigro-viridis PCC 7112 OX=179408 GN=Osc7112_1546 PE=3 SV=1	179408	7	6	15	2	NA	K9VEZ1		Oscillatoria nigro-viridis PCC 7112			Oscillatoria PCC 7112; Oscillatoria PCC7112; Oscillatoria sp. PCC 7112; Oscillatoria sp. PCC7112	annotated		Bacteria; Cyanobacteria; Oscillatoriophycideae; Oscillatoriales; Oscillatoriaceae; Oscillatoria	482564
208	502	tr|K9VMX0|K9VMX0_9CYAN	2	2012	Phosphoglucosamine mutase OS=Oscillatoria nigro-viridis PCC 7112 OX=179408 GN=Osc7112_4222 PE=3 SV=1	179408	10	4	NA	NA	NA	K9VMX0		Oscillatoria nigro-viridis PCC 7112			Oscillatoria PCC 7112; Oscillatoria PCC7112; Oscillatoria sp. PCC 7112; Oscillatoria sp. PCC7112	annotated		Bacteria; Cyanobacteria; Oscillatoriophycideae; Oscillatoriales; Oscillatoriaceae; Oscillatoria	482564
177	77	tr|A0A1U7J2T5|A0A1U7J2T5_9CYAN	5	1744	30S ribosomal protein S19 OS=Phormidium tenue NIES-30 OX=549789 GN=rpsS PE=3 SV=1	549789	2	3	NA	NA	NA	A0A1U7J2T5		Phormidium tenue NIES-30			Phormidium tenue IAM M-40	annotated		Bacteria; Cyanobacteria; Oscillatoriophycideae; Oscillatoriales; Oscillatoriaceae; Phormidium	126344
16	487	tr|K9TBE4|K9TBE4_9CYAN	11	189	Secreted/surface protein with fasciclin-like repeats OS=Pleurocapsa sp. PCC 7327 OX=118163 GN=Ple7327_4652 PE=4 SV=1	118163	11	13	6	4	7	K9TBE4		Pleurocapsa sp. PCC 7327			Pleurocapsa PCC7327; Pleurocapsa minor OH-69-pm; Pleurocapsa sp. ATCC 29393	annotated		Bacteria; Cyanobacteria; Pleurocapsales; Hyellaceae; Pleurocapsa	54308
8	271	tr|A0A2T1GDY1|A0A2T1GDY1_9CYAN	10	43	60 kDa chaperonin OS=Chamaesiphon polymorphus CCALA 037 OX=2107692 GN=groL PE=3 SV=1	2107692	62	51	16	25	23	A0A2T1GDY1		Chamaesiphon polymorphus CCALA 037			Chamaesiphon polymorphus HINDAK 1984/5; Chamaesiphon polymorphus str. HINDAK 1984/5	annotated		Bacteria; Cyanobacteria; Synechococcales; Chamaesiphonaceae; Chamaesiphon	2107691
17	274	tr|A0A2T1GIM2|A0A2T1GIM2_9CYAN	5	191	Allophycocyanin subunit beta OS=Chamaesiphon polymorphus CCALA 037 OX=2107692 GN=apcB PE=3 SV=1	2107692	59	45	6	15	24	A0A2T1GIM2		Chamaesiphon polymorphus CCALA 037			Chamaesiphon polymorphus HINDAK 1984/5; Chamaesiphon polymorphus str. HINDAK 1984/5	annotated		Bacteria; Cyanobacteria; Synechococcales; Chamaesiphonaceae; Chamaesiphon	2107691
28	493	tr|K9UJ19|K9UJ19_CHAP6	6	292	Allophycocyanin alpha subunit apoprotein OS=Chamaesiphon minutus (strain ATCC 27169 / PCC 6605) OX=1173020 GN=Cha6605_3804 PE=3 SV=1	1173020	35	45	9	15	NA	K9UJ19	CHAP6	Chamaesiphon minutus (strain ATCC 27169 / PCC 6605)			Chamaesiphon minutus PCC 6605; Chamaesiphon sp. ACMM 446; Chamaesiphon sp. ATCC 27169; Chamaesiphon sp. PCC 6605	reviewed		Bacteria; Cyanobacteria; Synechococcales; Chamaesiphonaceae; Chamaesiphon	1173032
66	497	tr|K9UMB4|K9UMB4_CHAP6	8	550	60 kDa chaperonin OS=Chamaesiphon minutus (strain ATCC 27169 / PCC 6605) OX=1173020 GN=groL PE=3 SV=1	1173020	12	26	NA	2	2	K9UMB4	CHAP6	Chamaesiphon minutus (strain ATCC 27169 / PCC 6605)			Chamaesiphon minutus PCC 6605; Chamaesiphon sp. ACMM 446; Chamaesiphon sp. ATCC 27169; Chamaesiphon sp. PCC 6605	reviewed		Bacteria; Cyanobacteria; Synechococcales; Chamaesiphonaceae; Chamaesiphon	1173032
184	254	tr|A0A2T1FQR3|A0A2T1FQR3_9CYAN	4	1845	Carbohydrate porin (Fragment) OS=Chamaesiphon polymorphus CCALA 037 OX=2107692 GN=C7B77_24390 PE=3 SV=1	2107692	5	5	NA	2	3	A0A2T1FQR3		Chamaesiphon polymorphus CCALA 037			Chamaesiphon polymorphus HINDAK 1984/5; Chamaesiphon polymorphus str. HINDAK 1984/5	annotated		Bacteria; Cyanobacteria; Synechococcales; Chamaesiphonaceae; Chamaesiphon	2107691
187	492	tr|K9UGN6|K9UGN6_CHAP6	4	1878	ATP-dependent Clp protease proteolytic subunit OS=Chamaesiphon minutus (strain ATCC 27169 / PCC 6605) OX=1173020 GN=Cha6605_2963 PE=3 SV=1	1173020	4	4	NA	NA	NA	K9UGN6	CHAP6	Chamaesiphon minutus (strain ATCC 27169 / PCC 6605)			Chamaesiphon minutus PCC 6605; Chamaesiphon sp. ACMM 446; Chamaesiphon sp. ATCC 27169; Chamaesiphon sp. PCC 6605	reviewed		Bacteria; Cyanobacteria; Synechococcales; Chamaesiphonaceae; Chamaesiphon	1173032
203	270	tr|A0A2T1GA01|A0A2T1GA01_9CYAN	4	1996	Uncharacterized protein OS=Chamaesiphon polymorphus CCALA 037 OX=2107692 GN=C7B77_19060 PE=3 SV=1	2107692	2	6	NA	2	3	A0A2T1GA01		Chamaesiphon polymorphus CCALA 037			Chamaesiphon polymorphus HINDAK 1984/5; Chamaesiphon polymorphus str. HINDAK 1984/5	annotated		Bacteria; Cyanobacteria; Synechococcales; Chamaesiphonaceae; Chamaesiphon	2107691
250	258	tr|A0A2T1FYM6|A0A2T1FYM6_9CYAN	2	2352	SpoVT-AbrB domain-containing protein OS=Chamaesiphon polymorphus CCALA 037 OX=2107692 GN=C7B77_23165 PE=4 SV=1	2107692	2	NA	NA	NA	8	A0A2T1FYM6		Chamaesiphon polymorphus CCALA 037			Chamaesiphon polymorphus HINDAK 1984/5; Chamaesiphon polymorphus str. HINDAK 1984/5	annotated		Bacteria; Cyanobacteria; Synechococcales; Chamaesiphonaceae; Chamaesiphon	2107691
254	272	tr|A0A2T1GG36|A0A2T1GG36_9CYAN	3	2398	AbrB family transcriptional regulator OS=Chamaesiphon polymorphus CCALA 037 OX=2107692 GN=C7B77_11470 PE=4 SV=1	2107692	3	4	NA	2	NA	A0A2T1GG36		Chamaesiphon polymorphus CCALA 037			Chamaesiphon polymorphus HINDAK 1984/5; Chamaesiphon polymorphus str. HINDAK 1984/5	annotated		Bacteria; Cyanobacteria; Synechococcales; Chamaesiphonaceae; Chamaesiphon	2107691
260	273	tr|A0A2T1GHK6|A0A2T1GHK6_9CYAN	2	2452	Thioredoxin OS=Chamaesiphon polymorphus CCALA 037 OX=2107692 GN=trxA PE=3 SV=1	2107692	2	7	NA	NA	NA	A0A2T1GHK6		Chamaesiphon polymorphus CCALA 037			Chamaesiphon polymorphus HINDAK 1984/5; Chamaesiphon polymorphus str. HINDAK 1984/5	annotated		Bacteria; Cyanobacteria; Synechococcales; Chamaesiphonaceae; Chamaesiphon	2107691
2	293	tr|A0A2W7ANV7|A0A2W7ANV7_9CYAN	10	4	60 kDa chaperonin OS=Leptolyngbya sp. OX=47254 GN=groL PE=3 SV=1	47254	103	87	18	35	35	A0A2W7ANV7		Leptolyngbya sp.				annotated	Species	Bacteria; Cyanobacteria; Synechococcales; Leptolyngbyaceae; Leptolyngbya	2650499
10	30	tr|A0A0P4UKM5|A0A0P4UKM5_9CYAN	11	85	Phycocyanin beta chain OS=Leptolyngbya sp. NIES-2104 OX=1552121 GN=NIES2104_19250 PE=3 SV=1	1552121	20	26	5	8	18	A0A0P4UKM5		Leptolyngbya sp. NIES-2104				annotated	Species	Bacteria; Cyanobacteria; Synechococcales; Leptolyngbyaceae; Leptolyngbya	2650499
23	44	tr|A0A0X8WW16|A0A0X8WW16_9CYAN	9	268	Allophycocyanin alpha chain OS=Leptolyngbya sp. O-77 OX=1080068 GN=apcA PE=3 SV=1	1080068	5	4	4	NA	NA	A0A0X8WW16		Leptolyngbya sp. O-77				annotated	Species	Bacteria; Cyanobacteria; Synechococcales; Leptolyngbyaceae; Leptolyngbya	2650499
26	292	tr|A0A2W7ANT1|A0A2W7ANT1_9CYAN	5	281	Allophycocyanin subunit beta OS=Leptolyngbya sp. OX=47254 GN=apcB PE=3 SV=1	47254	55	30	13	4	13	A0A2W7ANT1		Leptolyngbya sp.				annotated	Species	Bacteria; Cyanobacteria; Synechococcales; Leptolyngbyaceae; Leptolyngbya	2650499
29	89	tr|A0A1Z4JFQ4|A0A1Z4JFQ4_LEPBY	9	297	Carbohydrate-selective porin OprB OS=Leptolyngbya boryana NIES-2135 OX=1973484 GN=NIES2135_23850 PE=3 SV=1	1973484	2	7	2	2	NA	A0A1Z4JFQ4		Leptolyngbya boryana NIES-2135				annotated		Bacteria; Cyanobacteria; Synechococcales; Leptolyngbyaceae; Leptolyngbya	1184
33	283	tr|A0A2W6ZT46|A0A2W6ZT46_9CYAN	9	323	ATP synthase subunit beta OS=Leptolyngbya sp. OX=47254 GN=atpD PE=3 SV=1	47254	39	23	9	5	4	A0A2W6ZT46		Leptolyngbya sp.				annotated	Species	Bacteria; Cyanobacteria; Synechococcales; Leptolyngbyaceae; Leptolyngbya	2650499
50	289	tr|A0A2W7AHJ1|A0A2W7AHJ1_9CYAN	6	426	S-layer protein OS=Leptolyngbya sp. OX=47254 GN=DCF22_07865 PE=3 SV=1	47254	41	18	4	4	NA	A0A2W7AHJ1		Leptolyngbya sp.				annotated	Species	Bacteria; Cyanobacteria; Synechococcales; Leptolyngbyaceae; Leptolyngbya	2650499
59	305	tr|A0A2W7B830|A0A2W7B830_9CYAN	8	513	10 kDa chaperonin OS=Leptolyngbya sp. OX=47254 GN=groS PE=3 SV=1	47254	21	19	5	2	6	A0A2W7B830		Leptolyngbya sp.				annotated	Species	Bacteria; Cyanobacteria; Synechococcales; Leptolyngbyaceae; Leptolyngbya	2650499
69	304	tr|A0A2W7B737|A0A2W7B737_9CYAN	5	571	Polyribonucleotide nucleotidyltransferase OS=Leptolyngbya sp. OX=47254 GN=pnp PE=3 SV=1	47254	18	11	NA	NA	NA	A0A2W7B737		Leptolyngbya sp.				annotated	Species	Bacteria; Cyanobacteria; Synechococcales; Leptolyngbyaceae; Leptolyngbya	2650499
77	31	tr|A0A0P4UUI5|A0A0P4UUI5_9CYAN	9	667	Urea ABC transporter substrate binding protein UrtA OS=Leptolyngbya sp. NIES-2104 OX=1552121 GN=NIES2104_47500 PE=4 SV=1	1552121	2	2	2	NA	5	A0A0P4UUI5		Leptolyngbya sp. NIES-2104				annotated	Species	Bacteria; Cyanobacteria; Synechococcales; Leptolyngbyaceae; Leptolyngbya	2650499
81	290	tr|A0A2W7ALH8|A0A2W7ALH8_9CYAN	7	692	30S ribosomal protein S1 OS=Leptolyngbya sp. OX=47254 GN=DCF22_09250 PE=4 SV=1	47254	16	11	NA	7	NA	A0A2W7ALH8		Leptolyngbya sp.				annotated	Species	Bacteria; Cyanobacteria; Synechococcales; Leptolyngbyaceae; Leptolyngbya	2650499
84	300	tr|A0A2W7AZ37|A0A2W7AZ37_9CYAN	6	712	60 kDa chaperonin OS=Leptolyngbya sp. OX=47254 GN=groL PE=3 SV=1	47254	12	16	NA	NA	NA	A0A2W7AZ37		Leptolyngbya sp.				annotated	Species	Bacteria; Cyanobacteria; Synechococcales; Leptolyngbyaceae; Leptolyngbya	2650499
100	288	tr|A0A2W7AHE0|A0A2W7AHE0_9CYAN	6	874	Elongation factor Tu OS=Leptolyngbya sp. OX=47254 GN=tuf PE=3 SV=1	47254	8	7	NA	NA	9	A0A2W7AHE0		Leptolyngbya sp.				annotated	Species	Bacteria; Cyanobacteria; Synechococcales; Leptolyngbyaceae; Leptolyngbya	2650499
102	338	tr|A0A3M9ZAE5|A0A3M9ZAE5_9CYAN	7	882	Fructose-1 6-bisphosphate aldolase OS=Leptolyngbya sp. IPPAS B-1204 OX=2483801 GN=fba PE=3 SV=1	2483801	6	5	NA	NA	NA	A0A3M9ZAE5		Leptolyngbya sp. IPPAS B-1204				annotated	Species	Bacteria; Cyanobacteria; Synechococcales; Leptolyngbyaceae; Leptolyngbya	2650499
111	285	tr|A0A2W7A1A5|A0A2W7A1A5_9CYAN	6	1006	Chaperone protein DnaK OS=Leptolyngbya sp. OX=47254 GN=dnaK PE=2 SV=1	47254	8	6	NA	NA	NA	A0A2W7A1A5		Leptolyngbya sp.				annotated	Species	Bacteria; Cyanobacteria; Synechococcales; Leptolyngbyaceae; Leptolyngbya	2650499
117	298	tr|A0A2W7AT93|A0A2W7AT93_9CYAN	4	1085	DNA-directed RNA polymerase subunit beta' OS=Leptolyngbya sp. OX=47254 GN=rpoC2 PE=3 SV=1	47254	15	6	NA	NA	NA	A0A2W7AT93		Leptolyngbya sp.				annotated	Species	Bacteria; Cyanobacteria; Synechococcales; Leptolyngbyaceae; Leptolyngbya	2650499
118	284	tr|A0A2W6ZYW2|A0A2W6ZYW2_9CYAN	4	1096	SLH domain-containing protein OS=Leptolyngbya sp. OX=47254 GN=DCF22_20830 PE=3 SV=1	47254	14	3	8	NA	5	A0A2W6ZYW2		Leptolyngbya sp.				annotated	Species	Bacteria; Cyanobacteria; Synechococcales; Leptolyngbyaceae; Leptolyngbya	2650499
124	303	tr|A0A2W7B6P4|A0A2W7B6P4_9CYAN	4	1177	ATP synthase subunit alpha OS=Leptolyngbya sp. OX=47254 GN=atpA PE=3 SV=1	47254	13	7	NA	NA	NA	A0A2W7B6P4		Leptolyngbya sp.				annotated	Species	Bacteria; Cyanobacteria; Synechococcales; Leptolyngbyaceae; Leptolyngbya	2650499
136	87	tr|A0A1Z4JAD5|A0A1Z4JAD5_LEPBY	5	1279	LuxR family transcriptional regulator OS=Leptolyngbya boryana NIES-2135 OX=1973484 GN=NIES2135_02020 PE=4 SV=1	1973484	6	9	NA	NA	NA	A0A1Z4JAD5		Leptolyngbya boryana NIES-2135				annotated		Bacteria; Cyanobacteria; Synechococcales; Leptolyngbyaceae; Leptolyngbya	1184
138	294	tr|A0A2W7AQJ2|A0A2W7AQJ2_9CYAN	2	1289	Uncharacterized protein OS=Leptolyngbya sp. OX=47254 GN=DCF22_02745 PE=4 SV=1	47254	17	7	NA	NA	NA	A0A2W7AQJ2		Leptolyngbya sp.				annotated	Species	Bacteria; Cyanobacteria; Synechococcales; Leptolyngbyaceae; Leptolyngbya	2650499
141	296	tr|A0A2W7AQM2|A0A2W7AQM2_9CYAN	2	1308	Porin OS=Leptolyngbya sp. OX=47254 GN=DCF22_02900 PE=3 SV=1	47254	17	8	NA	NA	NA	A0A2W7AQM2		Leptolyngbya sp.				annotated	Species	Bacteria; Cyanobacteria; Synechococcales; Leptolyngbyaceae; Leptolyngbya	2650499
144	92	tr|A0A1Z4JKR1|A0A1Z4JKR1_LEPBY	5	1330	Rhodanese domain-containing protein OS=Leptolyngbya boryana NIES-2135 OX=1973484 GN=NIES2135_41890 PE=4 SV=1	1973484	9	5	NA	NA	NA	A0A1Z4JKR1		Leptolyngbya boryana NIES-2135				annotated		Bacteria; Cyanobacteria; Synechococcales; Leptolyngbyaceae; Leptolyngbya	1184
146	310	tr|A0A2W7C488|A0A2W7C488_9CYAN	2	1372	DUF2267 domain-containing protein OS=Leptolyngbya sp. OX=47254 GN=DCF22_12360 PE=4 SV=1	47254	15	9	NA	NA	NA	A0A2W7C488		Leptolyngbya sp.				annotated	Species	Bacteria; Cyanobacteria; Synechococcales; Leptolyngbyaceae; Leptolyngbya	2650499
153	309	tr|A0A2W7BHQ9|A0A2W7BHQ9_9CYAN	3	1447	DNA-directed RNA polymerase subunit beta OS=Leptolyngbya sp. OX=47254 GN=rpoB PE=3 SV=1	47254	13	2	NA	NA	NA	A0A2W7BHQ9		Leptolyngbya sp.				annotated	Species	Bacteria; Cyanobacteria; Synechococcales; Leptolyngbyaceae; Leptolyngbya	2650499
158	308	tr|A0A2W7BFY6|A0A2W7BFY6_9CYAN	4	1512	Phycobiliprotein ApcE OS=Leptolyngbya sp. OX=47254 GN=DCF22_03035 PE=3 SV=1	47254	7	4	NA	NA	NA	A0A2W7BFY6		Leptolyngbya sp.				annotated	Species	Bacteria; Cyanobacteria; Synechococcales; Leptolyngbyaceae; Leptolyngbya	2650499
165	307	tr|A0A2W7BB34|A0A2W7BB34_9CYAN	5	1612	Peroxiredoxin OS=Leptolyngbya sp. OX=47254 GN=DCF22_05850 PE=3 SV=1	47254	8	4	NA	NA	NA	A0A2W7BB34		Leptolyngbya sp.				annotated	Species	Bacteria; Cyanobacteria; Synechococcales; Leptolyngbyaceae; Leptolyngbya	2650499
189	382	tr|A0A651DZH8|A0A651DZH8_9CYAN	4	1889	Red carotenoid-binding protein OS=Leptolyngbya sp. DLM2.Bin15 OX=2480212 GN=EA367_19480 PE=4 SV=1	2480212	4	4	NA	6	NA	A0A651DZH8		Leptolyngbya sp. DLM2.Bin15				annotated	Species	Bacteria; Cyanobacteria; Synechococcales; Leptolyngbyaceae; Leptolyngbya	2650499
198	295	tr|A0A2W7AQM0|A0A2W7AQM0_9CYAN	2	1960	50S ribosomal protein L10 OS=Leptolyngbya sp. OX=47254 GN=rplJ PE=3 SV=1	47254	11	4	NA	NA	NA	A0A2W7AQM0		Leptolyngbya sp.				annotated	Species	Bacteria; Cyanobacteria; Synechococcales; Leptolyngbyaceae; Leptolyngbya	2650499
199	91	tr|A0A1Z4JJX2|A0A1Z4JJX2_LEPBY	3	1962	Phycobilisome linker polypeptide OS=Leptolyngbya boryana NIES-2135 OX=1973484 GN=NIES2135_39160 PE=3 SV=1	1973484	6	3	NA	6	NA	A0A1Z4JJX2		Leptolyngbya boryana NIES-2135				annotated		Bacteria; Cyanobacteria; Synechococcales; Leptolyngbyaceae; Leptolyngbya	1184
200	302	tr|A0A2W7B0C8|A0A2W7B0C8_9CYAN	3	1967	Urea ABC transporter substrate-binding protein OS=Leptolyngbya sp. OX=47254 GN=urtA PE=4 SV=1	47254	5	2	NA	NA	NA	A0A2W7B0C8		Leptolyngbya sp.				annotated	Species	Bacteria; Cyanobacteria; Synechococcales; Leptolyngbyaceae; Leptolyngbya	2650499
209	43	tr|A0A0X8WUT4|A0A0X8WUT4_9CYAN	3	2018	Uncharacterized protein OS=Leptolyngbya sp. O-77 OX=1080068 GN=O77CONTIG1_02689 PE=4 SV=1	1080068	2	NA	NA	NA	NA	A0A0X8WUT4		Leptolyngbya sp. O-77				annotated	Species	Bacteria; Cyanobacteria; Synechococcales; Leptolyngbyaceae; Leptolyngbya	2650499
213	45	tr|A0A110AUW4|A0A110AUW4_9CYAN	2	2048	Coproporphyrin III ferrochelatase OS=Leptolyngbya sp. O-77 OX=1080068 GN=O77CONTIG1_00536 PE=3 SV=1	1080068	10	4	NA	NA	NA	A0A110AUW4		Leptolyngbya sp. O-77				annotated	Species	Bacteria; Cyanobacteria; Synechococcales; Leptolyngbyaceae; Leptolyngbya	2650499
232	287	tr|A0A2W7AB70|A0A2W7AB70_9CYAN	2	2210	Uncharacterized protein OS=Leptolyngbya sp. OX=47254 GN=DCF22_14250 PE=4 SV=1	47254	7	3	NA	NA	NA	A0A2W7AB70		Leptolyngbya sp.				annotated	Species	Bacteria; Cyanobacteria; Synechococcales; Leptolyngbyaceae; Leptolyngbya	2650499
233	291	tr|A0A2W7AMN4|A0A2W7AMN4_9CYAN	2	2217	Uncharacterized protein OS=Leptolyngbya sp. OX=47254 GN=DCF22_05270 PE=4 SV=1	47254	10	2	NA	NA	NA	A0A2W7AMN4		Leptolyngbya sp.				annotated	Species	Bacteria; Cyanobacteria; Synechococcales; Leptolyngbyaceae; Leptolyngbya	2650499
251	286	tr|A0A2W7A3F2|A0A2W7A3F2_9CYAN	2	2361	Photosystem I reaction center subunit XII OS=Leptolyngbya sp. OX=47254 GN=DCF22_18040 PE=3 SV=1	47254	8	2	NA	NA	NA	A0A2W7A3F2		Leptolyngbya sp.				annotated	Species	Bacteria; Cyanobacteria; Synechococcales; Leptolyngbyaceae; Leptolyngbya	2650499
256	42	tr|A0A0X8WR22|A0A0X8WR22_9CYAN	4	2405	General L-amino acid-binding periplasmic protein AapJ OS=Leptolyngbya sp. O-77 OX=1080068 GN=aapJ PE=3 SV=1	1080068	3	2	NA	2	3	A0A0X8WR22		Leptolyngbya sp. O-77				annotated	Species	Bacteria; Cyanobacteria; Synechococcales; Leptolyngbyaceae; Leptolyngbya	2650499
259	29	tr|A0A0N7Z3N3|A0A0N7Z3N3_9CYAN	2	2432	Polyketide_cyc domain-containing protein OS=Leptolyngbya sp. NIES-2104 OX=1552121 GN=NIES2104_02930 PE=4 SV=1	1552121	NA	4	NA	NA	NA	A0A0N7Z3N3		Leptolyngbya sp. NIES-2104				annotated	Species	Bacteria; Cyanobacteria; Synechococcales; Leptolyngbyaceae; Leptolyngbya	2650499
265	301	tr|A0A2W7B013|A0A2W7B013_9CYAN	2	2506	Transaldolase OS=Leptolyngbya sp. OX=47254 GN=tal PE=3 SV=1	47254	6	NA	NA	NA	2	A0A2W7B013		Leptolyngbya sp.				annotated	Species	Bacteria; Cyanobacteria; Synechococcales; Leptolyngbyaceae; Leptolyngbya	2650499
272	395	tr|A0A6I5Q2W1|A0A6I5Q2W1_9CYAN	2	2623	DNA starvation/stationary phase protection protein OS=Leptolyngbya sp. SIO3F4 OX=2607780 GN=F6K11_28130 PE=3 SV=1	2607780	4	4	NA	NA	NA	A0A6I5Q2W1		Leptolyngbya sp. SIO3F4				annotated	Species	Bacteria; Cyanobacteria; Synechococcales; Leptolyngbyaceae; Leptolyngbya	2650499
277	299	tr|A0A2W7AUK6|A0A2W7AUK6_9CYAN	2	2737	Uncharacterized protein OS=Leptolyngbya sp. OX=47254 GN=DCF22_00905 PE=4 SV=1	47254	5	2	NA	NA	NA	A0A2W7AUK6		Leptolyngbya sp.				annotated	Species	Bacteria; Cyanobacteria; Synechococcales; Leptolyngbyaceae; Leptolyngbya	2650499
285	306	tr|A0A2W7B944|A0A2W7B944_9CYAN	2	2834	BMP family ABC transporter substrate-binding protein OS=Leptolyngbya sp. OX=47254 GN=DCF22_01000 PE=3 SV=1	47254	4	2	NA	NA	NA	A0A2W7B944		Leptolyngbya sp.				annotated	Species	Bacteria; Cyanobacteria; Synechococcales; Leptolyngbyaceae; Leptolyngbya	2650499
289	72	tr|A0A1Q8Z7N5|A0A1Q8Z7N5_9CYAN	2	2868	DNA-directed RNA polymerase subunit alpha OS=Leptolyngbya sp. 'hensonii' OX=1922337 GN=rpoA PE=3 SV=1	1922337	NA	2	NA	NA	NA	A0A1Q8Z7N5		Leptolyngbya sp. 'hensonii'			Oscillatoriales cyanobacterium 'hensonii'	annotated	Species	Bacteria; Cyanobacteria; Synechococcales; Leptolyngbyaceae; Leptolyngbya	2650499
291	73	tr|A0A1Q8Z933|A0A1Q8Z933_9CYAN	2	2928	Chaperone protein DnaK OS=Leptolyngbya sp. 'hensonii' OX=1922337 GN=dnaK PE=2 SV=1	1922337	NA	2	NA	NA	NA	A0A1Q8Z933		Leptolyngbya sp. 'hensonii'			Oscillatoriales cyanobacterium 'hensonii'	annotated	Species	Bacteria; Cyanobacteria; Synechococcales; Leptolyngbyaceae; Leptolyngbya	2650499
1	201	tr|A0A2T1DKV5|A0A2T1DKV5_9CYAN	10	3	Phycocyanin subunit alpha OS=Phormidesmis priestleyi ULC007 OX=1920490 GN=cpcA PE=3 SV=1	1920490	53	39	NA	16	9	A0A2T1DKV5		Phormidesmis priestleyi ULC007				annotated		Bacteria; Cyanobacteria; Synechococcales; Leptolyngbyaceae; Phormidesmis	268141
3	186	tr|A0A2T1DGA4|A0A2T1DGA4_9CYAN	10	5	60 kDa chaperonin OS=Phormidesmis priestleyi ULC007 OX=1920490 GN=groL PE=3 SV=1	1920490	76	69	18	31	23	A0A2T1DGA4		Phormidesmis priestleyi ULC007				annotated		Bacteria; Cyanobacteria; Synechococcales; Leptolyngbyaceae; Phormidesmis	268141
4	187	tr|A0A2T1DGA8|A0A2T1DGA8_9CYAN	11	6	Fasciclin domain-containing protein OS=Phormidesmis priestleyi ULC007 OX=1920490 GN=C7B65_11485 PE=4 SV=1	1920490	38	39	10	9	10	A0A2T1DGA8		Phormidesmis priestleyi ULC007				annotated		Bacteria; Cyanobacteria; Synechococcales; Leptolyngbyaceae; Phormidesmis	268141
5	181	tr|A0A2T1DFX5|A0A2T1DFX5_9CYAN	11	16	SLH domain-containing protein OS=Phormidesmis priestleyi ULC007 OX=1920490 GN=C7B65_10825 PE=3 SV=1	1920490	8	13	8	11	3	A0A2T1DFX5		Phormidesmis priestleyi ULC007				annotated		Bacteria; Cyanobacteria; Synechococcales; Leptolyngbyaceae; Phormidesmis	268141
6	202	tr|A0A2T1DKV9|A0A2T1DKV9_9CYAN	11	18	Phycocyanin subunit beta OS=Phormidesmis priestleyi ULC007 OX=1920490 GN=C7B65_04085 PE=3 SV=1	1920490	48	25	5	15	39	A0A2T1DKV9		Phormidesmis priestleyi ULC007				annotated		Bacteria; Cyanobacteria; Synechococcales; Leptolyngbyaceae; Phormidesmis	268141
7	173	tr|A0A2T1DD05|A0A2T1DD05_9CYAN	9	42	S-layer protein OS=Phormidesmis priestleyi ULC007 OX=1920490 GN=C7B65_15860 PE=3 SV=1	1920490	5	13	3	2	NA	A0A2T1DD05		Phormidesmis priestleyi ULC007				annotated		Bacteria; Cyanobacteria; Synechococcales; Leptolyngbyaceae; Phormidesmis	268141
9	185	tr|A0A2T1DG79|A0A2T1DG79_9CYAN	9	51	10 kDa chaperonin OS=Phormidesmis priestleyi ULC007 OX=1920490 GN=groS PE=3 SV=1	1920490	6	11	NA	5	6	A0A2T1DG79		Phormidesmis priestleyi ULC007				annotated		Bacteria; Cyanobacteria; Synechococcales; Leptolyngbyaceae; Phormidesmis	268141
11	203	tr|A0A2T1DL13|A0A2T1DL13_9CYAN	10	116	SLH domain-containing protein OS=Phormidesmis priestleyi ULC007 OX=1920490 GN=C7B65_04375 PE=3 SV=1	1920490	3	12	4	3	NA	A0A2T1DL13		Phormidesmis priestleyi ULC007				annotated		Bacteria; Cyanobacteria; Synechococcales; Leptolyngbyaceae; Phormidesmis	268141
12	217	tr|A0A2T1DNN0|A0A2T1DNN0_9CYAN	10	122	ATP synthase subunit beta OS=Phormidesmis priestleyi ULC007 OX=1920490 GN=atpD PE=3 SV=1	1920490	39	36	11	18	4	A0A2T1DNN0		Phormidesmis priestleyi ULC007				annotated		Bacteria; Cyanobacteria; Synechococcales; Leptolyngbyaceae; Phormidesmis	268141
13	196	tr|A0A2T1DJD4|A0A2T1DJD4_9CYAN	10	134	60 kDa chaperonin OS=Phormidesmis priestleyi ULC007 OX=1920490 GN=groL PE=3 SV=1	1920490	22	22	4	3	2	A0A2T1DJD4		Phormidesmis priestleyi ULC007				annotated		Bacteria; Cyanobacteria; Synechococcales; Leptolyngbyaceae; Phormidesmis	268141
15	212	tr|A0A2T1DM89|A0A2T1DM89_9CYAN	10	179	SLH domain-containing protein OS=Phormidesmis priestleyi ULC007 OX=1920490 GN=C7B65_02800 PE=3 SV=1	1920490	21	16	2	4	21	A0A2T1DM89		Phormidesmis priestleyi ULC007				annotated		Bacteria; Cyanobacteria; Synechococcales; Leptolyngbyaceae; Phormidesmis	268141
20	170	tr|A0A2T1DCE2|A0A2T1DCE2_9CYAN	9	249	Porin OS=Phormidesmis priestleyi ULC007 OX=1920490 GN=C7B65_16480 PE=3 SV=1	1920490	2	10	2	2	NA	A0A2T1DCE2		Phormidesmis priestleyi ULC007				annotated		Bacteria; Cyanobacteria; Synechococcales; Leptolyngbyaceae; Phormidesmis	268141
21	163	tr|A0A2T1D8J6|A0A2T1D8J6_9CYAN	7	262	AMIN domain-containing protein OS=Phormidesmis priestleyi ULC007 OX=1920490 GN=C7B65_20405 PE=3 SV=1	1920490	3	3	NA	NA	NA	A0A2T1D8J6		Phormidesmis priestleyi ULC007				annotated		Bacteria; Cyanobacteria; Synechococcales; Leptolyngbyaceae; Phormidesmis	268141
27	161	tr|A0A2T1D797|A0A2T1D797_9CYAN	9	284	Chaperone protein DnaK OS=Phormidesmis priestleyi ULC007 OX=1920490 GN=dnaK PE=2 SV=1	1920490	3	6	NA	2	4	A0A2T1D797		Phormidesmis priestleyi ULC007				annotated		Bacteria; Cyanobacteria; Synechococcales; Leptolyngbyaceae; Phormidesmis	268141
31	174	tr|A0A2T1DD61|A0A2T1DD61_9CYAN	7	318	Uncharacterized protein OS=Phormidesmis priestleyi ULC007 OX=1920490 GN=C7B65_15320 PE=4 SV=1	1920490	2	2	NA	NA	NA	A0A2T1DD61		Phormidesmis priestleyi ULC007				annotated		Bacteria; Cyanobacteria; Synechococcales; Leptolyngbyaceae; Phormidesmis	268141
34	215	tr|A0A2T1DMN4|A0A2T1DMN4_9CYAN	8	335	ATP synthase subunit alpha OS=Phormidesmis priestleyi ULC007 OX=1920490 GN=atpA PE=3 SV=1	1920490	15	9	NA	NA	3	A0A2T1DMN4		Phormidesmis priestleyi ULC007				annotated		Bacteria; Cyanobacteria; Synechococcales; Leptolyngbyaceae; Phormidesmis	268141
36	155	tr|A0A2T1D2X3|A0A2T1D2X3_9CYAN	8	340	RNA-binding protein OS=Phormidesmis priestleyi ULC007 OX=1920490 GN=C7B65_25800 PE=4 SV=1	1920490	5	7	NA	3	NA	A0A2T1D2X3		Phormidesmis priestleyi ULC007				annotated		Bacteria; Cyanobacteria; Synechococcales; Leptolyngbyaceae; Phormidesmis	268141
38	168	tr|A0A2T1DBW2|A0A2T1DBW2_9CYAN	7	347	DUF4331 domain-containing protein OS=Phormidesmis priestleyi ULC007 OX=1920490 GN=C7B65_17070 PE=4 SV=1	1920490	6	4	NA	NA	NA	A0A2T1DBW2		Phormidesmis priestleyi ULC007				annotated		Bacteria; Cyanobacteria; Synechococcales; Leptolyngbyaceae; Phormidesmis	268141
47	199	tr|A0A2T1DKF9|A0A2T1DKF9_9CYAN	7	408	Polyribonucleotide nucleotidyltransferase OS=Phormidesmis priestleyi ULC007 OX=1920490 GN=pnp PE=3 SV=1	1920490	12	9	NA	NA	NA	A0A2T1DKF9		Phormidesmis priestleyi ULC007				annotated		Bacteria; Cyanobacteria; Synechococcales; Leptolyngbyaceae; Phormidesmis	268141
48	206	tr|A0A2T1DLU9|A0A2T1DLU9_9CYAN	8	410	Photosystem I 16 kDa polypeptide OS=Phormidesmis priestleyi ULC007 OX=1920490 GN=C7B65_02270 PE=3 SV=1	1920490	9	8	NA	6	NA	A0A2T1DLU9		Phormidesmis priestleyi ULC007				annotated		Bacteria; Cyanobacteria; Synechococcales; Leptolyngbyaceae; Phormidesmis	268141
53	157	tr|A0A2T1D5P1|A0A2T1D5P1_9CYAN	6	445	HU family DNA-binding protein OS=Phormidesmis priestleyi ULC007 OX=1920490 GN=C7B65_23695 PE=3 SV=1	1920490	2	NA	NA	NA	NA	A0A2T1D5P1		Phormidesmis priestleyi ULC007				annotated		Bacteria; Cyanobacteria; Synechococcales; Leptolyngbyaceae; Phormidesmis	268141
56	189	tr|A0A2T1DGP8|A0A2T1DGP8_9CYAN	7	462	RNA-binding protein OS=Phormidesmis priestleyi ULC007 OX=1920490 GN=C7B65_10195 PE=4 SV=1	1920490	5	8	NA	NA	NA	A0A2T1DGP8		Phormidesmis priestleyi ULC007				annotated		Bacteria; Cyanobacteria; Synechococcales; Leptolyngbyaceae; Phormidesmis	268141
60	197	tr|A0A2T1DJS0|A0A2T1DJS0_9CYAN	7	517	Uncharacterized protein OS=Phormidesmis priestleyi ULC007 OX=1920490 GN=C7B65_06645 PE=4 SV=1	1920490	2	NA	NA	NA	10	A0A2T1DJS0		Phormidesmis priestleyi ULC007				annotated		Bacteria; Cyanobacteria; Synechococcales; Leptolyngbyaceae; Phormidesmis	268141
74	165	tr|A0A2T1DAM9|A0A2T1DAM9_9CYAN	9	634	Urea ABC transporter substrate-binding protein OS=Phormidesmis priestleyi ULC007 OX=1920490 GN=urtA PE=4 SV=1	1920490	5	7	2	NA	5	A0A2T1DAM9		Phormidesmis priestleyi ULC007				annotated		Bacteria; Cyanobacteria; Synechococcales; Leptolyngbyaceae; Phormidesmis	268141
75	164	tr|A0A2T1DA47|A0A2T1DA47_9CYAN	5	651	ATP-dependent Clp protease proteolytic subunit OS=Phormidesmis priestleyi ULC007 OX=1920490 GN=clpP PE=3 SV=1	1920490	NA	8	NA	NA	NA	A0A2T1DA47		Phormidesmis priestleyi ULC007				annotated		Bacteria; Cyanobacteria; Synechococcales; Leptolyngbyaceae; Phormidesmis	268141
78	159	tr|A0A2T1D6A6|A0A2T1D6A6_9CYAN	7	674	Phycobiliprotein ApcE OS=Phormidesmis priestleyi ULC007 OX=1920490 GN=C7B65_22910 PE=3 SV=1	1920490	4	6	NA	NA	NA	A0A2T1D6A6		Phormidesmis priestleyi ULC007				annotated		Bacteria; Cyanobacteria; Synechococcales; Leptolyngbyaceae; Phormidesmis	268141
80	175	tr|A0A2T1DDD3|A0A2T1DDD3_9CYAN	7	678	Superoxide dismutase OS=Phormidesmis priestleyi ULC007 OX=1920490 GN=C7B65_15395 PE=3 SV=1	1920490	3	2	NA	NA	NA	A0A2T1DDD3		Phormidesmis priestleyi ULC007				annotated		Bacteria; Cyanobacteria; Synechococcales; Leptolyngbyaceae; Phormidesmis	268141
83	169	tr|A0A2T1DC92|A0A2T1DC92_9CYAN	7	706	Cytochrome c-550 OS=Phormidesmis priestleyi ULC007 OX=1920490 GN=psbV PE=3 SV=1	1920490	2	2	NA	NA	NA	A0A2T1DC92		Phormidesmis priestleyi ULC007				annotated		Bacteria; Cyanobacteria; Synechococcales; Leptolyngbyaceae; Phormidesmis	268141
88	191	tr|A0A2T1DHC9|A0A2T1DHC9_9CYAN	7	751	Nucleoside diphosphate kinase OS=Phormidesmis priestleyi ULC007 OX=1920490 GN=ndk PE=3 SV=1	1920490	6	2	NA	NA	NA	A0A2T1DHC9		Phormidesmis priestleyi ULC007				annotated		Bacteria; Cyanobacteria; Synechococcales; Leptolyngbyaceae; Phormidesmis	268141
89	208	tr|A0A2T1DLX1|A0A2T1DLX1_9CYAN	7	757	30S ribosomal protein S5 OS=Phormidesmis priestleyi ULC007 OX=1920490 GN=rpsE PE=3 SV=1	1920490	6	3	NA	NA	NA	A0A2T1DLX1		Phormidesmis priestleyi ULC007				annotated		Bacteria; Cyanobacteria; Synechococcales; Leptolyngbyaceae; Phormidesmis	268141
90	207	tr|A0A2T1DLV5|A0A2T1DLV5_9CYAN	6	766	50S ribosomal protein L5 OS=Phormidesmis priestleyi ULC007 OX=1920490 GN=rplE PE=3 SV=1	1920490	NA	NA	2	NA	NA	A0A2T1DLV5		Phormidesmis priestleyi ULC007				annotated		Bacteria; Cyanobacteria; Synechococcales; Leptolyngbyaceae; Phormidesmis	268141
91	182	tr|A0A2T1DG34|A0A2T1DG34_9CYAN	8	780	ATP-dependent zinc metalloprotease FtsH OS=Phormidesmis priestleyi ULC007 OX=1920490 GN=ftsH PE=3 SV=1	1920490	6	3	4	2	2	A0A2T1DG34		Phormidesmis priestleyi ULC007				annotated		Bacteria; Cyanobacteria; Synechococcales; Leptolyngbyaceae; Phormidesmis	268141
92	160	tr|A0A2T1D784|A0A2T1D784_9CYAN	5	784	Bicarbonate-binding protein OS=Phormidesmis priestleyi ULC007 OX=1920490 GN=C7B65_21905 PE=3 SV=1	1920490	14	13	NA	NA	NA	A0A2T1D784		Phormidesmis priestleyi ULC007				annotated		Bacteria; Cyanobacteria; Synechococcales; Leptolyngbyaceae; Phormidesmis	268141
99	190	tr|A0A2T1DGZ9|A0A2T1DGZ9_9CYAN	5	843	Glyceraldehyde-3-phosphate dehydrogenase OS=Phormidesmis priestleyi ULC007 OX=1920490 GN=gap PE=3 SV=1	1920490	9	6	NA	NA	NA	A0A2T1DGZ9		Phormidesmis priestleyi ULC007				annotated		Bacteria; Cyanobacteria; Synechococcales; Leptolyngbyaceae; Phormidesmis	268141
101	193	tr|A0A2T1DHK3|A0A2T1DHK3_9CYAN	7	879	Red carotenoid-binding protein OS=Phormidesmis priestleyi ULC007 OX=1920490 GN=C7B65_09880 PE=3 SV=1	1920490	7	7	NA	3	2	A0A2T1DHK3		Phormidesmis priestleyi ULC007				annotated		Bacteria; Cyanobacteria; Synechococcales; Leptolyngbyaceae; Phormidesmis	268141
104	218	tr|A0A2T1DP56|A0A2T1DP56_9CYAN	6	903	30S ribosomal protein S7 OS=Phormidesmis priestleyi ULC007 OX=1920490 GN=rpsG PE=3 SV=1	1920490	5	NA	9	NA	NA	A0A2T1DP56		Phormidesmis priestleyi ULC007				annotated		Bacteria; Cyanobacteria; Synechococcales; Leptolyngbyaceae; Phormidesmis	268141
110	180	tr|A0A2T1DFV2|A0A2T1DFV2_9CYAN	7	997	DNA starvation/stationary phase protection protein OS=Phormidesmis priestleyi ULC007 OX=1920490 GN=C7B65_12295 PE=3 SV=1	1920490	2	NA	NA	NA	4	A0A2T1DFV2		Phormidesmis priestleyi ULC007				annotated		Bacteria; Cyanobacteria; Synechococcales; Leptolyngbyaceae; Phormidesmis	268141
113	183	tr|A0A2T1DG40|A0A2T1DG40_9CYAN	6	1034	Uncharacterized protein OS=Phormidesmis priestleyi ULC007 OX=1920490 GN=C7B65_10845 PE=4 SV=1	1920490	NA	5	NA	NA	NA	A0A2T1DG40		Phormidesmis priestleyi ULC007				annotated		Bacteria; Cyanobacteria; Synechococcales; Leptolyngbyaceae; Phormidesmis	268141
115	158	tr|A0A2T1D646|A0A2T1D646_9CYAN	6	1054	Photosystem II CP43 reaction center protein OS=Phormidesmis priestleyi ULC007 OX=1920490 GN=psbC PE=3 SV=1	1920490	8	8	NA	NA	NA	A0A2T1D646		Phormidesmis priestleyi ULC007				annotated		Bacteria; Cyanobacteria; Synechococcales; Leptolyngbyaceae; Phormidesmis	268141
126	184	tr|A0A2T1DG55|A0A2T1DG55_9CYAN	6	1192	50S ribosomal protein L1 OS=Phormidesmis priestleyi ULC007 OX=1920490 GN=rplA PE=3 SV=1	1920490	NA	2	NA	NA	NA	A0A2T1DG55		Phormidesmis priestleyi ULC007				annotated		Bacteria; Cyanobacteria; Synechococcales; Leptolyngbyaceae; Phormidesmis	268141
129	204	tr|A0A2T1DL37|A0A2T1DL37_9CYAN	5	1207	Glutamine synthetase OS=Phormidesmis priestleyi ULC007 OX=1920490 GN=glnA PE=3 SV=1	1920490	3	4	NA	NA	NA	A0A2T1DL37		Phormidesmis priestleyi ULC007				annotated		Bacteria; Cyanobacteria; Synechococcales; Leptolyngbyaceae; Phormidesmis	268141
130	211	tr|A0A2T1DLZ3|A0A2T1DLZ3_9CYAN	7	1225	50S ribosomal protein L2 OS=Phormidesmis priestleyi ULC007 OX=1920490 GN=rplB PE=3 SV=1	1920490	2	2	NA	NA	NA	A0A2T1DLZ3		Phormidesmis priestleyi ULC007				annotated		Bacteria; Cyanobacteria; Synechococcales; Leptolyngbyaceae; Phormidesmis	268141
135	176	tr|A0A2T1DEW5|A0A2T1DEW5_9CYAN	5	1270	Glutathione S-transferase family protein OS=Phormidesmis priestleyi ULC007 OX=1920490 GN=C7B65_13455 PE=4 SV=1	1920490	4	2	NA	NA	NA	A0A2T1DEW5		Phormidesmis priestleyi ULC007				annotated		Bacteria; Cyanobacteria; Synechococcales; Leptolyngbyaceae; Phormidesmis	268141
145	205	tr|A0A2T1DL99|A0A2T1DL99_9CYAN	6	1354	Allophycocyanin subunit beta OS=Phormidesmis priestleyi ULC007 OX=1920490 GN=apcB PE=3 SV=1	1920490	4	3	NA	NA	NA	A0A2T1DL99		Phormidesmis priestleyi ULC007				annotated		Bacteria; Cyanobacteria; Synechococcales; Leptolyngbyaceae; Phormidesmis	268141
157	195	tr|A0A2T1DHY8|A0A2T1DHY8_9CYAN	6	1500	Uncharacterized protein OS=Phormidesmis priestleyi ULC007 OX=1920490 GN=C7B65_08525 PE=4 SV=1	1920490	NA	2	NA	NA	NA	A0A2T1DHY8		Phormidesmis priestleyi ULC007				annotated		Bacteria; Cyanobacteria; Synechococcales; Leptolyngbyaceae; Phormidesmis	268141
160	179	tr|A0A2T1DFN1|A0A2T1DFN1_9CYAN	5	1517	Chaperone protein ClpB OS=Phormidesmis priestleyi ULC007 OX=1920490 GN=clpB PE=3 SV=1	1920490	3	4	NA	7	2	A0A2T1DFN1		Phormidesmis priestleyi ULC007				annotated		Bacteria; Cyanobacteria; Synechococcales; Leptolyngbyaceae; Phormidesmis	268141
163	213	tr|A0A2T1DMD6|A0A2T1DMD6_9CYAN	4	1594	30S ribosomal protein S18 OS=Phormidesmis priestleyi ULC007 OX=1920490 GN=rpsR PE=3 SV=1	1920490	NA	2	NA	NA	NA	A0A2T1DMD6		Phormidesmis priestleyi ULC007				annotated		Bacteria; Cyanobacteria; Synechococcales; Leptolyngbyaceae; Phormidesmis	268141
164	156	tr|A0A2T1D3J8|A0A2T1D3J8_9CYAN	3	1596	ATP-dependent Clp protease proteolytic subunit OS=Phormidesmis priestleyi ULC007 OX=1920490 GN=clpP PE=3 SV=1	1920490	2	NA	NA	NA	NA	A0A2T1D3J8		Phormidesmis priestleyi ULC007				annotated		Bacteria; Cyanobacteria; Synechococcales; Leptolyngbyaceae; Phormidesmis	268141
169	198	tr|A0A2T1DK33|A0A2T1DK33_9CYAN	4	1654	D-3-phosphoglycerate dehydrogenase OS=Phormidesmis priestleyi ULC007 OX=1920490 GN=C7B65_05230 PE=3 SV=1	1920490	3	2	NA	NA	NA	A0A2T1DK33		Phormidesmis priestleyi ULC007				annotated		Bacteria; Cyanobacteria; Synechococcales; Leptolyngbyaceae; Phormidesmis	268141
174	192	tr|A0A2T1DHF5|A0A2T1DHF5_9CYAN	4	1679	Universal stress protein OS=Phormidesmis priestleyi ULC007 OX=1920490 GN=C7B65_09550 PE=3 SV=1	1920490	2	NA	NA	NA	NA	A0A2T1DHF5		Phormidesmis priestleyi ULC007				annotated		Bacteria; Cyanobacteria; Synechococcales; Leptolyngbyaceae; Phormidesmis	268141
179	210	tr|A0A2T1DLY2|A0A2T1DLY2_9CYAN	4	1776	50S ribosomal protein L15 OS=Phormidesmis priestleyi ULC007 OX=1920490 GN=rplO PE=3 SV=1	1920490	2	NA	NA	NA	NA	A0A2T1DLY2		Phormidesmis priestleyi ULC007				annotated		Bacteria; Cyanobacteria; Synechococcales; Leptolyngbyaceae; Phormidesmis	268141
186	214	tr|A0A2T1DMM9|A0A2T1DMM9_9CYAN	4	1861	Photosystem I reaction center subunit XI OS=Phormidesmis priestleyi ULC007 OX=1920490 GN=psaL PE=3 SV=1	1920490	NA	2	NA	NA	NA	A0A2T1DMM9		Phormidesmis priestleyi ULC007				annotated		Bacteria; Cyanobacteria; Synechococcales; Leptolyngbyaceae; Phormidesmis	268141
192	167	tr|A0A2T1DB89|A0A2T1DB89_9CYAN	4	1923	Nucleoid-associated protein C7B65_17660 OS=Phormidesmis priestleyi ULC007 OX=1920490 GN=C7B65_17660 PE=3 SV=1	1920490	NA	NA	NA	NA	2	A0A2T1DB89		Phormidesmis priestleyi ULC007				annotated		Bacteria; Cyanobacteria; Synechococcales; Leptolyngbyaceae; Phormidesmis	268141
193	188	tr|A0A2T1DGE7|A0A2T1DGE7_9CYAN	3	1926	GMP synthase [glutamine-hydrolyzing] OS=Phormidesmis priestleyi ULC007 OX=1920490 GN=guaA PE=3 SV=1	1920490	4	3	NA	NA	NA	A0A2T1DGE7		Phormidesmis priestleyi ULC007				annotated		Bacteria; Cyanobacteria; Synechococcales; Leptolyngbyaceae; Phormidesmis	268141
194	178	tr|A0A2T1DFJ0|A0A2T1DFJ0_9CYAN	4	1945	Uncharacterized protein OS=Phormidesmis priestleyi ULC007 OX=1920490 GN=C7B65_11645 PE=4 SV=1	1920490	3	NA	NA	NA	NA	A0A2T1DFJ0		Phormidesmis priestleyi ULC007				annotated		Bacteria; Cyanobacteria; Synechococcales; Leptolyngbyaceae; Phormidesmis	268141
217	216	tr|A0A2T1DNF6|A0A2T1DNF6_9CYAN	2	2100	ATP-dependent zinc metalloprotease FtsH OS=Phormidesmis priestleyi ULC007 OX=1920490 GN=ftsH PE=3 SV=1	1920490	6	NA	NA	NA	NA	A0A2T1DNF6		Phormidesmis priestleyi ULC007				annotated		Bacteria; Cyanobacteria; Synechococcales; Leptolyngbyaceae; Phormidesmis	268141
229	162	tr|A0A2T1D8C5|A0A2T1D8C5_9CYAN	4	2185	Histidinol dehydrogenase OS=Phormidesmis priestleyi ULC007 OX=1920490 GN=hisD PE=3 SV=1	1920490	3	5	NA	NA	NA	A0A2T1D8C5		Phormidesmis priestleyi ULC007				annotated		Bacteria; Cyanobacteria; Synechococcales; Leptolyngbyaceae; Phormidesmis	268141
243	177	tr|A0A2T1DF44|A0A2T1DF44_9CYAN	3	2289	Phosphoribulokinase OS=Phormidesmis priestleyi ULC007 OX=1920490 GN=C7B65_12485 PE=3 SV=1	1920490	6	2	NA	NA	NA	A0A2T1DF44		Phormidesmis priestleyi ULC007				annotated		Bacteria; Cyanobacteria; Synechococcales; Leptolyngbyaceae; Phormidesmis	268141
264	200	tr|A0A2T1DKH7|A0A2T1DKH7_9CYAN	2	2491	Molybdopterin-synthase adenylyltransferase MoeB OS=Phormidesmis priestleyi ULC007 OX=1920490 GN=C7B65_05880 PE=4 SV=1	1920490	2	NA	NA	NA	NA	A0A2T1DKH7		Phormidesmis priestleyi ULC007				annotated		Bacteria; Cyanobacteria; Synechococcales; Leptolyngbyaceae; Phormidesmis	268141
42	226	tr|A0A2T1E0P4|A0A2T1E0P4_9CYAN	9	369	S-layer protein OS=Stenomitos frigidus ULC18 OX=2107698 GN=C7B82_20145 PE=3 SV=1	2107698	15	10	2	6	NA	A0A2T1E0P4		Stenomitos frigidus ULC18			Leptolyngbya frigida ULC18	annotated		Bacteria; Cyanobacteria; Synechococcales; Leptolyngbyaceae; Stenomitos	1886765
108	220	tr|A0A2T1DSJ7|A0A2T1DSJ7_9CYAN	2	958	Fasciclin OS=Stenomitos frigidus ULC18 OX=2107698 GN=C7B82_31090 PE=4 SV=1	2107698	14	15	NA	NA	NA	A0A2T1DSJ7		Stenomitos frigidus ULC18			Leptolyngbya frigida ULC18	annotated		Bacteria; Cyanobacteria; Synechococcales; Leptolyngbyaceae; Stenomitos	1886765
269	234	tr|A0A2T1EP47|A0A2T1EP47_9CYAN	3	2574	NTP_transf_9 domain-containing protein OS=Stenomitos frigidus ULC18 OX=2107698 GN=C7B82_02990 PE=4 SV=1	2107698	3	NA	NA	NA	NA	A0A2T1EP47		Stenomitos frigidus ULC18			Leptolyngbya frigida ULC18	annotated		Bacteria; Cyanobacteria; Synechococcales; Leptolyngbyaceae; Stenomitos	1886765
40	280	tr|A0A2W4XH96|A0A2W4XH96_9CYAN	7	353	Fasciclin OS=Shackletoniella antarctica OX=268115 GN=DCF17_19075 PE=4 SV=1	268115	33	20	18	10	2	A0A2W4XH96		Shackletoniella antarctica			CBFS A-155; Leptolyngbya antarctica; Leptolyngbya antarctica (West & G.S.West, 1911) Anagnostidis & Komarek , 1988; Phormidium antarcticum; Phormidium antarcticum West & G.S.West, 1911; Shackletoniella antarctica (West & G.S.West, 1911) Strunecky, Raabova & Bernardova, 2020; ULC037; ULC:037; personal::ANT.LH18.2; strain ANT.LH18.2	annotated	Species	Bacteria; Cyanobacteria; Synechococcales; Oculatellaceae; Shackletoniella	2784135
271	80	tr|A0A1Z3HQM9|A0A1Z3HQM9_9CYAN	3	2612	Phage shock protein A OS=Halomicronema hongdechloris C2206 OX=1641165 GN=XM38_035200 PE=3 SV=1	1641165	3	NA	NA	NA	NA	A0A1Z3HQM9		Halomicronema hongdechloris C2206			Halomicronema sp. C2206	annotated		Bacteria; Cyanobacteria; Synechococcales; Prochlorotrichaceae; Halomicronema	1209493
166	281	tr|A0A2W4XW24|A0A2W4XW24_9CYAN	6	1622	Uncharacterized protein OS=Pseudanabaena frigida OX=945775 GN=DCF19_15390 PE=4 SV=1	945775	6	2	NA	NA	NA	A0A2W4XW24		Pseudanabaena frigida			Pseudanabaena frigida (Fritsch) Anagnostidis 2001	annotated	Species	Bacteria; Cyanobacteria; Synechococcales; Pseudanabaenaceae; Pseudanabaena	1152
238	549	tr|L8N0G6|L8N0G6_9CYAN	2	2257	Phycocyanin beta subunit OS=Pseudanabaena biceps PCC 7429 OX=927668 GN=Pse7429DRAFT_3555 PE=3 SV=1	927668	NA	4	7	NA	NA	L8N0G6		Pseudanabaena biceps PCC 7429			Pseudanabaena sp. B5; Pseudanabaena sp. PCC 7429	annotated		Bacteria; Cyanobacteria; Synechococcales; Pseudanabaenaceae; Pseudanabaena	927669
41	2	P12834|CH601_SYNP6	9	354	60 kDa chaperonin 1 OS=Synechococcus sp. (strain ATCC 27144 / PCC 6301 / SAUG 1402/1) OX=269084 GN=groL1 PE=3 SV=2	269084	28	28	8	7	NA	CH601_SYNP6	SYNP6	Synechococcus sp. (strain ATCC 27144 / PCC 6301 / SAUG 1402/1)		Anacystis nidulans	Anacystis nidulans SAUG 1402-1; Synechococcus 6301; Synechococcus PCC 6301; Synechococcus PCC6301; Synechococcus elongatus PCC 6301; Synechococcus leopoliensis CCAP 1405/1; Synechococcus leopoliensis IAM M-6; Synechococcus leopoliensis SAG 1402-1; Synechococcus nidulans NIVA-CYA 20; Synechococcus sp. (ATCC 27144); Synechococcus sp. (PCC 6301); Synechococcus sp. (strain PCC 6301); Synechococcus sp…	reviewed		Bacteria; Cyanobacteria; Synechococcales; Synechococcaceae; Synechococcus	32046
204	18	tr|A0A0G2HN27|A0A0G2HN27_9SYNE	4	2001	Allophycocyanin OS=Candidatus Synechococcus spongiarum SP3 OX=1604020 GN=TE42_00285 PE=3 SV=1	1604020	5	5	NA	2	2	A0A0G2HN27		Candidatus Synechococcus spongiarum SP3				annotated		Bacteria; Cyanobacteria; Synechococcales; Synechococcaceae; Synechococcus	431041
288	5	tr|A0A072YN03|A0A072YN03_CLONO	2	2864	Putative regulatory protein Z958_02495 OS=Clostridium novyi B str. NCTC 9691 OX=1443122 GN=Z958_02495 PE=3 SV=1	1443122	3	2	NA	NA	NA	A0A072YN03		Clostridium novyi B str. NCTC 9691				annotated		Bacteria; Firmicutes; Clostridia; Eubacteriales; Clostridiaceae; Clostridium	1809275
275	1	C1A8L8|CH60_GEMAT	2	2663	60 kDa chaperonin OS=Gemmatimonas aurantiaca (strain T-27 / DSM 14586 / JCM 11422 / NBRC 100505) OX=379066 GN=groL PE=3 SV=1	379066	2	4	NA	NA	NA	CH60_GEMAT	GEMAT	Gemmatimonas aurantiaca (strain T-27 / DSM 14586 / JCM 11422 / NBRC 100505)			Gemmatimonas aurantiaca DSM 14586; Gemmatimonas aurantiaca JCM 11422; Gemmatimonas aurantiaca NBRC 100505; Gemmatimonas aurantiaca T-27; Gemmatimonas aurantiaca str. T-27; Gemmatimonas aurantiaca strain T-27	reviewed		Bacteria; Gemmatimonadetes; Gemmatimonadales; Gemmatimonadaceae; Gemmatimonas	173480
276	64	tr|A0A1G2ZJX9|A0A1G2ZJX9_9BACT	2	2707	60 kDa chaperonin OS=Planctomycetes bacterium RBG_16_43_13 OX=1801967 GN=groL PE=3 SV=1	1801967	2	5	NA	NA	NA	A0A1G2ZJX9		Planctomycetes bacterium RBG_16_43_13				annotated	Species	Bacteria; Planctomycetes	473814
236	547	tr|L0DHM7|L0DHM7_SINAD	3	2233	RRM domain-containing RNA-binding protein OS=Singulisphaera acidiphila (strain ATCC BAA-1392 / DSM 18658 / VKM B-2454 / MOB10) OX=886293 GN=Sinac_3965 PE=4 SV=1	886293	NA	2	NA	NA	NA	L0DHM7	SINAD	Singulisphaera acidiphila (strain ATCC BAA-1392 / DSM 18658 / VKM B-2454 / MOB10)			Singulisphaera acidiphila ATCC BAA-1392; Singulisphaera acidiphila DSM 18658; Singulisphaera acidiphila MOB10; Singulisphaera acidiphila str. DSM 18658; Singulisphaera acidiphila strain DSM 18658	reviewed		Bacteria; Planctomycetes; Planctomycetia; Isosphaerales; Isosphaeraceae; Singulisphaera	466153
68	352	tr|A0A4Q5QII1|A0A4Q5QII1_9PROT	8	563	60 kDa chaperonin (Fragment) OS=Alphaproteobacteria bacterium OX=1913988 GN=groL PE=3 SV=1	1913988	2	NA	2	NA	5	A0A4Q5QII1		Alphaproteobacteria bacterium				annotated	Species	Bacteria; Proteobacteria; Alphaproteobacteria	33807
295	35	tr|A0A0Q7S9D4|A0A0Q7S9D4_9CAUL	2	3021	OmpA-like domain-containing protein (Fragment) OS=Brevundimonas sp. Root1423 OX=1736462 GN=ASD25_10625 PE=4 SV=1	1736462	NA	2	3	NA	NA	A0A0Q7S9D4		Brevundimonas sp. Root1423				annotated	Species	Bacteria; Proteobacteria; Alphaproteobacteria; Caulobacterales; Caulobacteraceae; Brevundimonas; unclassified Brevundimonas	2622653
220	70	tr|A0A1M5A620|A0A1M5A620_9RHIZ	3	2113	Inositol transport system substrate-binding protein OS=Kaistia soli DSM 19436 OX=1122133 GN=SAMN02745157_2026 PE=4 SV=1	1122133	NA	2	NA	NA	NA	A0A1M5A620		Kaistia soli DSM 19436			Kaistia soli 5YN9-8; Kaistia soli NBRC 106436	annotated		Bacteria; Proteobacteria; Alphaproteobacteria; Rhizobiales; Rhizobiaceae; Kaistia	446684
188	24	tr|A0A0K6HLZ5|A0A0K6HLZ5_9RHOB	3	1880	Mannose-binding protein/fructose-binding protein/ribose-binding protein OS=Pannonibacter indicus OX=466044 GN=Ga0061067_101124 PE=4 SV=1	466044	2	10	4	NA	NA	A0A0K6HLZ5		Pannonibacter indicus			"Pannonibacter indica" Bandyopadhyay et al. 2013; Achromobacter sp. HT23; DSM 23407; JCM 16851; LMG 25769; LMG:25769; Pannonibacter indica; Pannonibacter indicus corrig. Bandyopadhyay et al. 2013; Pannonibacter sp. HT23; strain HT23	annotated	Species	Bacteria; Proteobacteria; Alphaproteobacteria; Rhodobacterales; Rhodobacteraceae; Pannonibacter	227873
210	374	tr|A0A5C4N3F5|A0A5C4N3F5_9RHOB	2	2031	Carbohydrate ABC transporter substrate-binding protein OS=Rubellimicrobium rubrum OX=2585369 GN=FHG66_03890 PE=4 SV=1	2585369	7	7	NA	NA	NA	A0A5C4N3F5		Rubellimicrobium rubrum			"Rubellimicrobium rubrum" Jiang et al. 2019; CGMCC 1.13958; KCTC 72461; NBRC 114054; Rubellimicrobium sp. YIM 131921; YIM 131921	annotated	Species	Bacteria; Proteobacteria; Alphaproteobacteria; Rhodobacterales; Rhodobacteraceae; Rubellimicrobium	295418
51	121	tr|A0A259MK25|A0A259MK25_9PROT	8	429	Fasciclin OS=Rhodospirillales bacterium 39-66-50 OX=1970570 GN=B7X63_15405 PE=4 SV=1	1970570	2	2	NA	NA	NA	A0A259MK25		Rhodospirillales bacterium 39-66-50				annotated	Species	Bacteria; Proteobacteria; Alphaproteobacteria; Rhodospirillales	941843
45	381	tr|A0A5R9J9Q4|A0A5R9J9Q4_9PROT	9	401	60 kDa chaperonin OS=Lichenicoccus roseus OX=2683649 GN=groL PE=3 SV=1	2683649	2	NA	2	NA	5	A0A5R9J9Q4		Lichenicoccus roseus			Acetobacteraceae bacterium KAMCLST3051; Acetobacteraceae bacterium KAMCLST3152; Acetobacteraceae bacterium KEBCLARHB70R; KCTC 72321; Lichenicoccus roseus Pankratov et al. 2020; VKM B-3305; strain KEBCLARHB70R	annotated	Species	Bacteria; Proteobacteria; Alphaproteobacteria; Rhodospirillales; Acetobacteraceae; Lichenicoccus	2781897
201	41	tr|A0A0X8P181|A0A0X8P181_ALCXX	3	1977	DNA-directed RNA polymerase subunit beta' OS=Alcaligenes xylosoxydans xylosoxydans OX=85698 GN=rpoC PE=3 SV=1	85698	3	6	NA	NA	NA	A0A0X8P181	ALCXX	Alcaligenes xylosoxydans xylosoxydans		Achromobacter xylosoxidans	"Achromobacter xylosoxidans" Yabuuchi and Ohyama 1971; ATCC 27061; Achromobacter sp. 2789STDY5608606; Achromobacter sp. 2789STDY5608609; Achromobacter sp. 2789STDY5608611; Achromobacter sp. 2789STDY5608612; Achromobacter sp. 2789STDY5608616; Achromobacter sp. 2789STDY5608618; Achromobacter sp. 2789STDY5608619; Achromobacter sp. 2789STDY5608620; Achromobacter sp. 2789STDY5608622; Achromobacter sp.…	reviewed	Species	Bacteria; Proteobacteria; Betaproteobacteria; Burkholderiales; Alcaligenaceae; Achromobacter	222
234	34	tr|A0A0Q6W7P5|A0A0Q6W7P5_9BURK	4	2220	Uncharacterized protein OS=Pelomonas sp. Root1237 OX=1736434 GN=ASC91_20200 PE=4 SV=1	1736434	4	3	NA	NA	NA	A0A0Q6W7P5		Pelomonas sp. Root1237				annotated	Species	Bacteria; Proteobacteria; Betaproteobacteria; Burkholderiales; Comamonadaceae; Pelomonas; unclassified Pelomonas	2638132
206	379	tr|A0A5Q3HJG5|A0A5Q3HJG5_9BURK	4	2005	Phasin family protein OS=Polaromonas sp. Pch-P OX=2082385 GN=F7R28_15960 PE=4 SV=1	2082385	NA	2	NA	NA	NA	A0A5Q3HJG5		Polaromonas sp. Pch-P				annotated	Species	Bacteria; Proteobacteria; Betaproteobacteria; Burkholderiales; Comamonadaceae; Polaromonas; unclassified Polaromonas	2638319
64	434	tr|A0A7G8VV73|A0A7G8VV73_9BURK	7	545	OmpA family protein OS=Variovorax sp. PAMC28562 OX=2762323 GN=H7F36_12200 PE=4 SV=1	2762323	NA	NA	2	NA	NA	A0A7G8VV73		Variovorax sp. PAMC28562				annotated	Species	Bacteria; Proteobacteria; Betaproteobacteria; Burkholderiales; Comamonadaceae; Variovorax	663243
85	435	tr|A0A7G8VYV3|A0A7G8VYV3_9BURK	6	723	Fasciclin domain-containing protein OS=Variovorax sp. PAMC28562 OX=2762323 GN=H7F36_19635 PE=4 SV=1	2762323	7	11	13	NA	NA	A0A7G8VYV3		Variovorax sp. PAMC28562				annotated	Species	Bacteria; Proteobacteria; Betaproteobacteria; Burkholderiales; Comamonadaceae; Variovorax	663243
176	436	tr|A0A7G8VZN1|A0A7G8VZN1_9BURK	4	1733	Phasin family protein OS=Variovorax sp. PAMC28562 OX=2762323 GN=H7F36_21235 PE=4 SV=1	2762323	NA	2	NA	NA	NA	A0A7G8VZN1		Variovorax sp. PAMC28562				annotated	Species	Bacteria; Proteobacteria; Betaproteobacteria; Burkholderiales; Comamonadaceae; Variovorax	663243
62	351	tr|A0A4Q3IYK0|A0A4Q3IYK0_9DELT	6	520	60 kDa chaperonin OS=Myxococcales bacterium OX=2026763 GN=groL PE=3 SV=1	2026763	2	3	NA	NA	NA	A0A4Q3IYK0		Myxococcales bacterium				annotated	Species	Bacteria; Proteobacteria; Deltaproteobacteria; Myxococcales	213495
279	16	tr|A0A0F2R967|A0A0F2R967_9PSED	2	2753	Ferritin OS=Pseudomonas sp. BRH_c35 OX=1629711 GN=VR76_00045 PE=3 SV=1	1629711	5	2	NA	NA	NA	A0A0F2R967		Pseudomonas sp. BRH_c35				annotated	Species	Bacteria; Proteobacteria; Gammaproteobacteria; Pseudomonadales; Pseudomonadaceae; Pseudomonas	196821
131	23	tr|A0A0K2ZX84|A0A0K2ZX84_XANCT	8	1239	FAS1 domain-containing protein OS=Xanthomonas translucens pv. poae OX=227946 GN=XTPLMG728_2020 PE=4 SV=1	227946	2	2	NA	NA	NA	A0A0K2ZX84		Xanthomonas translucens pv. poae				annotated		Bacteria; Proteobacteria; Gammaproteobacteria; Xanthomonadales; Xanthomonadaceae; Xanthomonas	343
70	4	tr|A0A067P7C4|A0A067P7C4_PLEOS	7	575	Uncharacterized protein OS=Pleurotus ostreatus PC15 OX=1137138 GN=PLEOSDRAFT_1081506 PE=4 SV=1	1137138	3	2	NA	NA	NA	A0A067P7C4		Pleurotus ostreatus PC15				annotated		Eukaryota; Fungi; Dikarya; Basidiomycota; Agaricomycotina; Agaricomycetes; Agaricomycetidae; Agaricales; Pleurotaceae; Pleurotus	5322
22	315	tr|A0A346QR77|A0A346QR77_PROCL	8	264	Cytoplasmic actin 1 (Fragment) OS=Procambarus clarkii OX=6728 GN=Actb PE=2 SV=1	6728	30	42	NA	16	NA	A0A346QR77	PROCL	Procambarus clarkii	Red swamp crayfish		Procambarus clarkia; Procambarus clarkii (Girard, 1852); Procumbarus clarkii	reviewed	Species	Eukaryota; Metazoa; Ecdysozoa; Arthropoda; Crustacea; Multicrustacea; Malacostraca; Eumalacostraca; Eucarida; Decapoda; Pleocyemata; Astacidea; Astacoidea; Cambaridae; Procambarus	6726
128	135	tr|A0A2G8KRV2|A0A2G8KRV2_STIJA	2	1198	Tubulin beta chain OS=Stichopus japonicus OX=307972 GN=BSL78_12375 PE=3 SV=1	307972	14	13	NA	NA	NA	A0A2G8KRV2	STIJA	Stichopus japonicus	Sea cucumber		Apostichopus japonicus; Apostichopus japonicus (Selenka, 1867); Japanese sea cucumber	reviewed	Species	Eukaryota; Metazoa; Echinodermata; Eleutherozoa; Echinozoa; Holothuroidea; Aspidochirotacea; Aspidochirotida; Stichopodidae; Apostichopus	307971
97	478	tr|J9RBL9|J9RBL9_ADIRI	2	834	Tubulin alpha chain (Fragment) OS=Adineta ricciae OX=249248 PE=3 SV=1	249248	12	25	NA	NA	NA	J9RBL9	ADIRI	Adineta ricciae	Rotifer			annotated	Species	Eukaryota; Metazoa; Spiralia; Gnathifera; Rotifera; Eurotatoria; Bdelloidea; Adinetida; Adinetidae; Adineta	104781
214	424	tr|A0A6S8H488|A0A6S8H488_DUNTE	3	2050	Superoxide dismutase OS=Dunaliella tertiolecta OX=3047 GN=DTER00134_1486 PE=3 SV=1	3047	NA	2	NA	4	6	A0A6S8H488	DUNTE	Dunaliella tertiolecta	Green alga		Dunaliella tertiolecta Butcher; SAG 13.86	reviewed	Species	Eukaryota; Viridiplantae; Chlorophyta; core chlorophytes; Chlorophyceae; CS clade; Chlamydomonadales; Dunaliellaceae; Dunaliella	3044
284	12	tr|A0A0D2JVB6|A0A0D2JVB6_9CHLO	2	2798	Elongation factor Tu chloroplastic OS=Monoraphidium neglectum OX=145388 GN=MNEG_5220 PE=3 SV=1	145388	2	NA	3	NA	NA	A0A0D2JVB6		Monoraphidium neglectum			Monoraphidium neglectum Heynig & Krienitz; SAG 48.87	annotated	Species	Eukaryota; Viridiplantae; Chlorophyta; core chlorophytes; Chlorophyceae; CS clade; Sphaeropleales; Selenastraceae; Monoraphidium	34111
86	330	tr|A0A3G4ZVK3|A0A3G4ZVK3_9VIRU	7	726	Polyubiquitin OS=Edafosvirus sp. OX=2487765 GN=Edafosvirus51_4 PE=4 SV=1	2487765	3	2	NA	NA	NA	A0A3G4ZVK3	NA	NA	NA	NA	NA	NA	NA	NA	NA
152	136	tr|A0A2H5XBS4|A0A2H5XBS4_9BACT	7	1424	Immunogenic protein MPB70 OS=bacterium HR17 OX=2035412 GN=HRbin17_01147 PE=4 SV=1	2035412	2	2	2	NA	NA	A0A2H5XBS4	NA	NA	NA	NA	NA	NA	NA	NA	NA

## Sheet: Caucasus_proteins
Column1	X	Accession	n	Protein.Group	Description	codes	B1	B2	B3	B5	B6	B4	uniprot	Mnemonic	Scientific.name	Common.name	Synonym	Other.Names	Reviewed	Rank	Lineage	Parent
358	336	tr|A0A2V8QGY6|A0A2V8QGY6_9BACT	2	2974	RNA-binding protein OS=Acidobacteria bacterium OX=1978231 GN=DMF73_04180 PE=4 SV=1	1978231	2	NA	NA	NA	2	NA	A0A2V8QGY6		Acidobacteria bacterium				annotated	Species	Bacteria; Acidobacteria	305072
273	102	tr|A0A1Q3QQP8|A0A1Q3QQP8_9BACT	3	2149	Uncharacterized protein OS=Acidobacteriales bacterium 59-55 OX=1895690 GN=BGO25_19250 PE=4 SV=1	1895690	NA	NA	NA	2	2	8	A0A1Q3QQP8		Acidobacteriales bacterium 59-55				annotated	Species	Bacteria; Acidobacteria; Acidobacteriales	1803467
228	421	tr|A0A428MJG2|A0A428MJG2_9BACT	5	1792	Carboxypeptidase family protein OS=Edaphobacter aggregans OX=570835 GN=EDE15_2476 PE=4 SV=1	570835	4	NA	3	2	5	2	A0A428MJG2		Edaphobacter aggregans			ATCC BAA-1497; DSM 19364; Edaphobacter aggregans Koch et al. 2008 emend. Dedysh et al. 2012; culture-collection:ATCC:BAA:1497; strain Wbg-1	annotated	Species	Bacteria; Acidobacteria; Acidobacteriales; Acidobacteriaceae; Edaphobacter	388463
278	411	tr|A0A3R9NV48|A0A3R9NV48_9BACT	3	2211	Superoxide dismutase OS=Edaphobacter aggregans OX=570835 GN=EDE15_3016 PE=3 SV=1	570835	4	NA	2	NA	3	NA	A0A3R9NV48		Edaphobacter aggregans			ATCC BAA-1497; DSM 19364; Edaphobacter aggregans Koch et al. 2008 emend. Dedysh et al. 2012; culture-collection:ATCC:BAA:1497; strain Wbg-1	annotated	Species	Bacteria; Acidobacteria; Acidobacteriales; Acidobacteriaceae; Edaphobacter	388463
44	607	tr|E8WVD9|E8WVD9_GRATM	7	383	60 kDa chaperonin OS=Granulicella tundricola (strain ATCC BAA-1859 / DSM 23138 / MP5ACTX9) OX=1198114 GN=groL PE=3 SV=1	1198114	18	12	18	4	25	4	E8WVD9	GRATM	Granulicella tundricola (strain ATCC BAA-1859 / DSM 23138 / MP5ACTX9)			Acidobacterium sp. MP5ACTX9; Granulicella sp. MP5ACTX9; Granulicella tundricola MP5ACTX9; Granulicella tundricola str. MP5ACTX9; Granulicella tundricola strain MP5ACTX9	annotated		Bacteria; Acidobacteria; Acidobacteriales; Acidobacteriaceae; Granulicella	940615
117	611	tr|E8X7I1|E8X7I1_GRATM	6	901	Cna B domain protein OS=Granulicella tundricola (strain ATCC BAA-1859 / DSM 23138 / MP5ACTX9) OX=1198114 GN=AciX9_4469 PE=4 SV=1	1198114	8	2	3	10	7	6	E8X7I1	GRATM	Granulicella tundricola (strain ATCC BAA-1859 / DSM 23138 / MP5ACTX9)			Acidobacterium sp. MP5ACTX9; Granulicella sp. MP5ACTX9; Granulicella tundricola MP5ACTX9; Granulicella tundricola str. MP5ACTX9; Granulicella tundricola strain MP5ACTX9	annotated		Bacteria; Acidobacteria; Acidobacteriales; Acidobacteriaceae; Granulicella	940615
121	90	tr|A0A1I6MDK2|A0A1I6MDK2_9BACT	5	963	TonB-dependent Receptor Plug Domain OS=Granulicella pectinivorans OX=474950 GN=SAMN05421771_2368 PE=4 SV=1	474950	3	NA	7	4	12	8	A0A1I6MDK2		Granulicella pectinivorans			Acidobacteria bacterium TPB6011; DSM 21001; Granulicella pectinivorans Pankratov and Dedysh 2010; VKM B-2509; culture-collection:VKM:B:2509; strain TPB6011	annotated	Species	Bacteria; Acidobacteria; Acidobacteriales; Acidobacteriaceae; Granulicella	940557
143	606	tr|E8WVB2|E8WVB2_GRATM	4	1161	Uncharacterized protein OS=Granulicella tundricola (strain ATCC BAA-1859 / DSM 23138 / MP5ACTX9) OX=1198114 GN=AciX9_0213 PE=4 SV=1	1198114	6	2	NA	7	12	NA	E8WVB2	GRATM	Granulicella tundricola (strain ATCC BAA-1859 / DSM 23138 / MP5ACTX9)			Acidobacterium sp. MP5ACTX9; Granulicella sp. MP5ACTX9; Granulicella tundricola MP5ACTX9; Granulicella tundricola str. MP5ACTX9; Granulicella tundricola strain MP5ACTX9	annotated		Bacteria; Acidobacteria; Acidobacteriales; Acidobacteriaceae; Granulicella	940615
174	91	tr|A0A1I6MZV6|A0A1I6MZV6_9BACT	4	1381	Cold-shock DNA-binding protein family OS=Granulicella pectinivorans OX=474950 GN=SAMN05421771_4053 PE=4 SV=1	474950	4	NA	6	9	4	NA	A0A1I6MZV6		Granulicella pectinivorans			Acidobacteria bacterium TPB6011; DSM 21001; Granulicella pectinivorans Pankratov and Dedysh 2010; VKM B-2509; culture-collection:VKM:B:2509; strain TPB6011	annotated	Species	Bacteria; Acidobacteria; Acidobacteriales; Acidobacteriaceae; Granulicella	940557
192	151	tr|A0A239CTP0|A0A239CTP0_9BACT	5	1534	Protein CcmA bactofilin family OS=Granulicella rosea OX=474952 GN=SAMN05421770_10197 PE=4 SV=1	474952	5	NA	2	2	9	3	A0A239CTP0		Granulicella rosea			ATCC BAA-1396; Acidobacteria bacterium T4; DSM 18704; Granulicella rosea Pankratov and Dedysh 2010; culture-collection:ATCC:BAA:1396; strain T4; strain TPO1014	annotated	Species	Bacteria; Acidobacteria; Acidobacteriales; Acidobacteriaceae; Granulicella	940557
231	609	tr|E8WYS0|E8WYS0_GRATM	4	1805	Phosphate-binding protein OS=Granulicella tundricola (strain ATCC BAA-1859 / DSM 23138 / MP5ACTX9) OX=1198114 GN=AciX9_1708 PE=3 SV=1	1198114	7	NA	2	5	2	NA	E8WYS0	GRATM	Granulicella tundricola (strain ATCC BAA-1859 / DSM 23138 / MP5ACTX9)			Acidobacterium sp. MP5ACTX9; Granulicella sp. MP5ACTX9; Granulicella tundricola MP5ACTX9; Granulicella tundricola str. MP5ACTX9; Granulicella tundricola strain MP5ACTX9	annotated		Bacteria; Acidobacteria; Acidobacteriales; Acidobacteriaceae; Granulicella	940615
235	150	tr|A0A239CSW9|A0A239CSW9_9BACT	4	1865	Outer membrane protein OmpA OS=Granulicella rosea OX=474952 GN=SAMN05421770_10178 PE=4 SV=1	474952	2	NA	3	4	6	NA	A0A239CSW9		Granulicella rosea			ATCC BAA-1396; Acidobacteria bacterium T4; DSM 18704; Granulicella rosea Pankratov and Dedysh 2010; culture-collection:ATCC:BAA:1396; strain T4; strain TPO1014	annotated	Species	Bacteria; Acidobacteria; Acidobacteriales; Acidobacteriaceae; Granulicella	940557
361	610	tr|E8X3Q6|E8X3Q6_GRATM	2	3024	TonB-dependent receptor plug OS=Granulicella tundricola (strain ATCC BAA-1859 / DSM 23138 / MP5ACTX9) OX=1198114 GN=AciX9_2296 PE=4 SV=1	1198114	2	NA	NA	NA	NA	2	E8X3Q6	GRATM	Granulicella tundricola (strain ATCC BAA-1859 / DSM 23138 / MP5ACTX9)			Acidobacterium sp. MP5ACTX9; Granulicella sp. MP5ACTX9; Granulicella tundricola MP5ACTX9; Granulicella tundricola str. MP5ACTX9; Granulicella tundricola strain MP5ACTX9	annotated		Bacteria; Acidobacteria; Acidobacteriales; Acidobacteriaceae; Granulicella	940615
320	84	tr|A0A1H4K5K6|A0A1H4K5K6_9BACT	2	2611	Threonine dehydrogenase OS=Terriglobus roseus OX=392734 GN=SAMN05443244_1020 PE=4 SV=1	392734	5	NA	3	NA	NA	NA	A0A1H4K5K6		Terriglobus roseus			DSM 18391; NRRL B-41598; Terraglobus roseus; Terriglobus roseus Eichorst et al. 2007; culture-collection:NRRL:B:41598; strain KBS 63	annotated	Species	Bacteria; Acidobacteria; Acidobacteriales; Acidobacteriaceae; Terriglobus	392733
88	572	tr|A0A7C4C091|A0A7C4C091_9BACT	6	675	60 kDa chaperonin OS=Bryobacteraceae bacterium OX=2212468 GN=groL PE=3 SV=1	2212468	4	17	5	NA	15	3	A0A7C4C091		Bryobacteraceae bacterium				annotated	Species	Bacteria; Acidobacteria; Bryobacterales; Bryobacteraceae	2212464
191	392	tr|A0A3D1AWC4|A0A3D1AWC4_9BACT	5	1523	TonB-dependent receptor OS=Bryobacterales bacterium OX=2026791 GN=DEQ47_08750 PE=4 SV=1	2026791	7	3	3	5	2	NA	A0A3D1AWC4		Bryobacterales bacterium			Solibacterales bacterium	annotated	Species	Bacteria; Acidobacteria; Bryobacterales; unclassified Bryobacterales	1470392
209	43	tr|A0A0R2PU64|A0A0R2PU64_9ACTN	4	1689	Cold-shock protein OS=Actinobacteria bacterium BACL4 MAG-121022-bin9 OX=1655582 GN=ABR74_02715 PE=4 SV=1	1655582	2	NA	NA	6	5	6	A0A0R2PU64		Actinobacteria bacterium BACL4 MAG-121022-bin9			Acidimicrobiia bacterium BACL4 MAG-121022-bin9	annotated	Species	Bacteria; Actinobacteria	52018
260	574	tr|A0A7D6EQQ9|A0A7D6EQQ9_9ACTN	2	2014	Sugar ABC transporter substrate-binding protein OS=Actinobacteria bacterium IMCC26103 OX=1848756 GN=DLE04_04710 PE=4 SV=1	1848756	NA	NA	NA	NA	3	10	A0A7D6EQQ9		Actinobacteria bacterium IMCC26103				annotated	Species	Bacteria; Actinobacteria	1752188
299	546	tr|A0A6I2YM16|A0A6I2YM16_9ACTN	4	2396	10 kDa chaperonin OS=Actinobacteria bacterium OX=1883427 GN=groS PE=3 SV=1	1883427	NA	2	2	3	3	NA	A0A6I2YM16		Actinobacteria bacterium			actinobacterium	annotated	Species	Bacteria; Actinobacteria	52018
269	80	tr|A0A1G8SBC7|A0A1G8SBC7_9ACTN	5	2090	40-residue YVTN family beta-propeller repeat-containing protein OS=Frankineae bacterium MT45 OX=1882833 GN=SAMN05444157_2538 PE=4 SV=1	1882833	2	NA	2	2	2	4	A0A1G8SBC7		Frankineae bacterium MT45				annotated	Species	Bacteria; Actinobacteria; Frankiales	1920255
311	520	tr|A0A5P9Q5T0|A0A5P9Q5T0_9MICO	2	2498	Alpha-glucosides-binding periplasmic protein AglE OS=Luteimicrobium xylanilyticum OX=1133546 GN=KDY119_00231 PE=4 SV=1	1133546	NA	NA	4	4	NA	NA	A0A5P9Q5T0		Luteimicrobium xylanilyticum			Cellulosimicrobium sp. W-15; JCM 18090; KCTC 19882; Luteimicrobium xylanilyticum Kim et al. 2014; strain W-15	annotated	Species	Bacteria; Actinobacteria; Micrococcales; Luteimicrobium	754249
128	390	tr|A0A3C1DZK8|A0A3C1DZK8_9MICO	4	1027	Phosphate-binding protein PstS OS=Microbacteriaceae bacterium OX=1873462 GN=pstS PE=3 SV=1	1873462	NA	NA	5	10	7	9	A0A3C1DZK8		Microbacteriaceae bacterium				annotated	Species	Bacteria; Actinobacteria; Micrococcales; Microbacteriaceae	90316
226	335	tr|A0A2V1HPZ0|A0A2V1HPZ0_9MICO	5	1786	30S ribosomal protein S1 OS=Amnibacterium flavum OX=2173173 GN=DDQ50_11790 PE=4 SV=1	2173173	NA	2	NA	NA	2	NA	A0A2V1HPZ0		Amnibacterium flavum			Amnibacterium flavum Tuo et al. 2019; Amnibacterium sp. M8JJ-5; CGMCC 1.16390; KCTC 49089; strain M8JJ-5	annotated	Species	Bacteria; Actinobacteria; Micrococcales; Microbacteriaceae; Amnibacterium	1029631
173	454	tr|A0A4R8YKV2|A0A4R8YKV2_9MICO	8	1380	Glycerol kinase OS=Cryobacterium breve OX=1259258 GN=glpK PE=3 SV=1	1259258	2	4	3	2	4	NA	A0A4R8YKV2		Cryobacterium breve			CGMCC 1.9556; Cryobacterium breve Liu et al. 2020; Cryobacterium sp. TMT4-23; NBRC 113800; strain TMT4-23	annotated	Species	Bacteria; Actinobacteria; Micrococcales; Microbacteriaceae; Cryobacterium	69578
98	450	tr|A0A4R8WTW5|A0A4R8WTW5_9MICO	3	742	Fn3_like domain-containing protein OS=Cryobacterium sp. MDB2-A-2 OX=1259182 GN=E3O35_02090 PE=3 SV=1	1259182	NA	NA	NA	18	20	6	A0A4R8WTW5		Cryobacterium sp. MDB2-A-2				annotated	Species	Bacteria; Actinobacteria; Micrococcales; Microbacteriaceae; Cryobacterium; unclassified Cryobacterium	2649013
131	451	tr|A0A4R8WXY6|A0A4R8WXY6_9MICO	3	1044	Fn3_like domain-containing protein OS=Cryobacterium sp. MDT1-3 OX=1259184 GN=E3O19_05365 PE=3 SV=1	1259184	NA	NA	NA	11	17	3	A0A4R8WXY6		Cryobacterium sp. MDT1-3				annotated	Species	Bacteria; Actinobacteria; Micrococcales; Microbacteriaceae; Cryobacterium; unclassified Cryobacterium	2649013
289	445	tr|A0A4R8VT96|A0A4R8VT96_9MICO	2	2305	30S ribosomal protein S9 OS=Cryobacterium sp. MDB2-B OX=1259183 GN=rpsI PE=3 SV=1	1259183	NA	NA	NA	NA	NA	6	A0A4R8VT96		Cryobacterium sp. MDB2-B				annotated	Species	Bacteria; Actinobacteria; Micrococcales; Microbacteriaceae; Cryobacterium; unclassified Cryobacterium	2649013
292	508	tr|A0A5F0DKK9|A0A5F0DKK9_9MICO	2	2319	Ferritin-like domain-containing protein OS=Cryobacterium sp. MDB2-33-2 OX=1259179 GN=E3O59_18905 PE=4 SV=1	1259179	NA	NA	NA	NA	7	2	A0A5F0DKK9		Cryobacterium sp. MDB2-33-2				annotated	Species	Bacteria; Actinobacteria; Micrococcales; Microbacteriaceae; Cryobacterium; unclassified Cryobacterium	2649013
326	11	tr|A0A086E115|A0A086E115_9MICO	3	2645	Membrane protein OS=Cryobacterium sp. MLB-32 OX=1529318 GN=JF66_04865 PE=3 SV=1	1529318	NA	NA	2	2	3	NA	A0A086E115		Cryobacterium sp. MLB-32				annotated	Species	Bacteria; Actinobacteria; Micrococcales; Microbacteriaceae; Cryobacterium; unclassified Cryobacterium	2649013
337	444	tr|A0A4R8VRM2|A0A4R8VRM2_9MICO	2	2731	Sugar ABC transporter substrate-binding protein OS=Cryobacterium sp. MDB2-B OX=1259183 GN=E3O44_08580 PE=4 SV=1	1259183	NA	NA	NA	NA	4	2	A0A4R8VRM2		Cryobacterium sp. MDB2-B				annotated	Species	Bacteria; Actinobacteria; Micrococcales; Microbacteriaceae; Cryobacterium; unclassified Cryobacterium	2649013
349	448	tr|A0A4R8WG39|A0A4R8WG39_9MICO	2	2860	Amino acid ABC transporter substrate-binding protein OS=Cryobacterium sp. MDB2-A-2 OX=1259182 GN=E3O35_16945 PE=4 SV=1	1259182	NA	NA	NA	3	3	NA	A0A4R8WG39		Cryobacterium sp. MDB2-A-2				annotated	Species	Bacteria; Actinobacteria; Micrococcales; Microbacteriaceae; Cryobacterium; unclassified Cryobacterium	2649013
360	10	tr|A0A086DWB8|A0A086DWB8_9MICO	2	3004	Uncharacterized protein OS=Cryobacterium sp. MLB-32 OX=1529318 GN=JF66_16395 PE=3 SV=1	1529318	NA	NA	3	NA	2	NA	A0A086DWB8		Cryobacterium sp. MLB-32				annotated	Species	Bacteria; Actinobacteria; Micrococcales; Microbacteriaceae; Cryobacterium; unclassified Cryobacterium	2649013
81	554	tr|A0A6L9XWW8|A0A6L9XWW8_9MICO	5	635	Sugar ABC transporter substrate-binding protein OS=Diaminobutyricibacter tongyongensis OX=1268043 GN=G3T36_06680 PE=4 SV=1	1268043	5	NA	3	8	21	13	A0A6L9XWW8		Diaminobutyricibacter tongyongensis			Diaminobutyricibacter tongyongensis Kim et al. 2014; KACC 15515; Labedella sp. KIS66-7; NBRC 108724; strain KIS66-7	annotated	Species	Bacteria; Actinobacteria; Micrococcales; Microbacteriaceae; Diaminobutyricibacter	1632778
114	553	tr|A0A6L9XTJ6|A0A6L9XTJ6_9MICO	6	880	Phosphoesterase OS=Diaminobutyricibacter tongyongensis OX=1268043 GN=G3T36_01800 PE=4 SV=1	1268043	5	2	6	12	7	5	A0A6L9XTJ6		Diaminobutyricibacter tongyongensis			Diaminobutyricibacter tongyongensis Kim et al. 2014; KACC 15515; Labedella sp. KIS66-7; NBRC 108724; strain KIS66-7	annotated	Species	Bacteria; Actinobacteria; Micrococcales; Microbacteriaceae; Diaminobutyricibacter	1632778
359	35	tr|A0A0Q5N3P9|A0A0Q5N3P9_9MICO	2	2990	D-ribose ABC transporter substrate-binding protein OS=Frigoribacterium sp. Leaf172 OX=1736285 GN=ASF89_12985 PE=4 SV=1	1736285	3	NA	2	NA	NA	NA	A0A0Q5N3P9		Frigoribacterium sp. Leaf172				annotated	Species	Bacteria; Actinobacteria; Micrococcales; Microbacteriaceae; Frigoribacterium; unclassified Frigoribacterium	2627005
109	579	tr|A0A7G6Z4Y4|A0A7G6Z4Y4_9MICO	5	835	Sugar ABC transporter substrate-binding protein OS=Glaciihabitans sp. INWT7 OX=2596912 GN=F1C58_01980 PE=4 SV=1	2596912	7	NA	4	7	14	7	A0A7G6Z4Y4		Glaciihabitans sp. INWT7				annotated	Species	Bacteria; Actinobacteria; Micrococcales; Microbacteriaceae; Glaciihabitans; unclassified Glaciihabitans	2645362
133	578	tr|A0A7G6Z4W2|A0A7G6Z4W2_9MICO	4	1057	Sugar ABC transporter substrate-binding protein OS=Glaciihabitans sp. INWT7 OX=2596912 GN=F1C58_01855 PE=4 SV=1	2596912	NA	NA	4	11	8	7	A0A7G6Z4W2		Glaciihabitans sp. INWT7				annotated	Species	Bacteria; Actinobacteria; Micrococcales; Microbacteriaceae; Glaciihabitans; unclassified Glaciihabitans	2645362
265	582	tr|A0A7G6ZBR4|A0A7G6ZBR4_9MICO	2	2055	Xanthorhodopsin OS=Glaciihabitans sp. INWT7 OX=2596912 GN=F1C58_15585 PE=3 SV=1	2596912	NA	4	NA	NA	8	NA	A0A7G6ZBR4		Glaciihabitans sp. INWT7				annotated	Species	Bacteria; Actinobacteria; Micrococcales; Microbacteriaceae; Glaciihabitans; unclassified Glaciihabitans	2645362
302	584	tr|A0A7G6ZCN3|A0A7G6ZCN3_9MICO	4	2430	Adenylyl cyclase OS=Glaciihabitans sp. INWT7 OX=2596912 GN=F1C58_12045 PE=4 SV=1	2596912	2	NA	2	NA	3	2	A0A7G6ZCN3		Glaciihabitans sp. INWT7				annotated	Species	Bacteria; Actinobacteria; Micrococcales; Microbacteriaceae; Glaciihabitans; unclassified Glaciihabitans	2645362
305	580	tr|A0A7G6Z7W3|A0A7G6Z7W3_9MICO	2	2437	Superoxide dismutase OS=Glaciihabitans sp. INWT7 OX=2596912 GN=F1C58_07870 PE=3 SV=1	2596912	NA	NA	2	NA	4	NA	A0A7G6Z7W3		Glaciihabitans sp. INWT7				annotated	Species	Bacteria; Actinobacteria; Micrococcales; Microbacteriaceae; Glaciihabitans; unclassified Glaciihabitans	2645362
319	581	tr|A0A7G6ZAY5|A0A7G6ZAY5_9MICO	2	2610	ABC transporter substrate-binding protein OS=Glaciihabitans sp. INWT7 OX=2596912 GN=F1C58_14010 PE=4 SV=1	2596912	NA	NA	NA	NA	6	2	A0A7G6ZAY5		Glaciihabitans sp. INWT7				annotated	Species	Bacteria; Actinobacteria; Micrococcales; Microbacteriaceae; Glaciihabitans; unclassified Glaciihabitans	2645362
352	585	tr|A0A7G6ZCP9|A0A7G6ZCP9_9MICO	2	2869	S8/S53 family peptidase OS=Glaciihabitans sp. INWT7 OX=2596912 GN=F1C58_12795 PE=4 SV=1	2596912	NA	NA	NA	3	2	NA	A0A7G6ZCP9		Glaciihabitans sp. INWT7				annotated	Species	Bacteria; Actinobacteria; Micrococcales; Microbacteriaceae; Glaciihabitans; unclassified Glaciihabitans	2645362
85	502	tr|A0A5C8UMK8|A0A5C8UMK8_9MICO	6	665	Phosphoesterase OS=Lacisediminihabitans profunda OX=2594790 GN=FVP33_13275 PE=4 SV=1	2594790	7	4	9	12	11	5	A0A5C8UMK8		Lacisediminihabitans profunda			"Lacisediminihabitans profunda" Zhuo et al. 2020; Glaciihabitans sp. CHu50b-6-2; JCM 32673; KCTC 49081; Microbacteriaceae bacterium CHu50b-6-2; strain CHu50b-6-2	annotated	Species	Bacteria; Actinobacteria; Micrococcales; Microbacteriaceae; Lacisediminihabitans	2740558
247	503	tr|A0A5C8US59|A0A5C8US59_9MICO	5	1941	Uncharacterized protein OS=Lacisediminihabitans profunda OX=2594790 GN=FVP33_05590 PE=4 SV=1	2594790	3	NA	2	6	2	2	A0A5C8US59		Lacisediminihabitans profunda			"Lacisediminihabitans profunda" Zhuo et al. 2020; Glaciihabitans sp. CHu50b-6-2; JCM 32673; KCTC 49081; Microbacteriaceae bacterium CHu50b-6-2; strain CHu50b-6-2	annotated	Species	Bacteria; Actinobacteria; Micrococcales; Microbacteriaceae; Lacisediminihabitans	2740558
264	504	tr|A0A5C8UUW4|A0A5C8UUW4_9MICO	5	2034	50S ribosomal protein L7/L12 OS=Lacisediminihabitans profunda OX=2594790 GN=rplL PE=3 SV=1	2594790	NA	NA	NA	NA	4	2	A0A5C8UUW4		Lacisediminihabitans profunda			"Lacisediminihabitans profunda" Zhuo et al. 2020; Glaciihabitans sp. CHu50b-6-2; JCM 32673; KCTC 49081; Microbacteriaceae bacterium CHu50b-6-2; strain CHu50b-6-2	annotated	Species	Bacteria; Actinobacteria; Micrococcales; Microbacteriaceae; Lacisediminihabitans	2740558
317	500	tr|A0A5C8ULG1|A0A5C8ULG1_9MICO	2	2604	Flagellin OS=Lacisediminihabitans profunda OX=2594790 GN=FVP33_13635 PE=3 SV=1	2594790	NA	NA	NA	2	5	NA	A0A5C8ULG1		Lacisediminihabitans profunda			"Lacisediminihabitans profunda" Zhuo et al. 2020; Glaciihabitans sp. CHu50b-6-2; JCM 32673; KCTC 49081; Microbacteriaceae bacterium CHu50b-6-2; strain CHu50b-6-2	annotated	Species	Bacteria; Actinobacteria; Micrococcales; Microbacteriaceae; Lacisediminihabitans	2740558
325	501	tr|A0A5C8UM10|A0A5C8UM10_9MICO	2	2633	Carbohydrate ABC transporter N-acetylglucosamine/diacetylchitobiose-binding protein OS=Lacisediminihabitans profunda OX=2594790 GN=ngcE PE=4 SV=1	2594790	NA	NA	NA	NA	4	3	A0A5C8UM10		Lacisediminihabitans profunda			"Lacisediminihabitans profunda" Zhuo et al. 2020; Glaciihabitans sp. CHu50b-6-2; JCM 32673; KCTC 49081; Microbacteriaceae bacterium CHu50b-6-2; strain CHu50b-6-2	annotated	Species	Bacteria; Actinobacteria; Micrococcales; Microbacteriaceae; Lacisediminihabitans	2740558
201	76	tr|A0A1E4M6G6|A0A1E4M6G6_9MICO	7	1646	Cold-shock protein OS=Leifsonia sp. SCN 70-46 OX=1660107 GN=ABT06_14890 PE=4 SV=1	1660107	2	NA	2	4	2	NA	A0A1E4M6G6		Leifsonia sp. SCN 70-46				annotated	Species	Bacteria; Actinobacteria; Micrococcales; Microbacteriaceae; Leifsonia	2663824
244	47	tr|A0A0T2KRR3|A0A0T2KRR3_9MICO	3	1916	ATP synthase subunit beta OS=Microbacterium sp. Root61 OX=1736570 GN=atpD PE=3 SV=1	1736570	NA	NA	NA	NA	8	NA	A0A0T2KRR3		Microbacterium sp. Root61				annotated	Species	Bacteria; Actinobacteria; Micrococcales; Microbacteriaceae; Microbacterium	2609290
168	400	tr|A0A3E0W8F7|A0A3E0W8F7_9MICO	4	1353	Uncharacterized protein OS=Subtercola boreus OX=120213 GN=B7R25_15685 PE=4 SV=1	120213	7	NA	3	5	7	NA	A0A3E0W8F7		Subtercola boreus			ATCC BAA-168; CCUG 43135; CIP 106947; DSM 13056; JCM 11267; NBRC 103085; Subtercola boreus Mannisto et al. 2000; culture-collection:ATCC:BAA:168; strain K300	annotated	Species	Bacteria; Actinobacteria; Micrococcales; Microbacteriaceae; Subtercola	120212
339	459	tr|A0A4T2C9N3|A0A4T2C9N3_9MICO	2	2754	Integration host factor OS=Subtercola vilae OX=2056433 GN=D4765_00485 PE=3 SV=1	2056433	NA	NA	2	NA	4	NA	A0A4T2C9N3		Subtercola vilae			"Subtercola vilae" Villalobos et al. 2018; DSM 105013; JCM 32044; Subtercola sp. DB165; strain DB165	annotated	Species	Bacteria; Actinobacteria; Micrococcales; Microbacteriaceae; Subtercola	120212
28	116	tr|A0A1Y3LS94|A0A1Y3LS94_9MICC	6	289	Cobalamin adenosyltransferase OS=Arthrobacter agilis OX=37921 GN=B8W73_12030 PE=4 SV=1	37921	16	5	19	16	29	26	A0A1Y3LS94		Arthrobacter agilis			ATCC 966; Arthrobacter agilis (Ali-Cohen 1889) Koch et al. 1995; CCM 2390; CIP 81.67; DSM 20550; IFO 15319; JCM 2584; LMG 17244; LMG:17244; Micrococcus agilis; Micrococcus agilis Ali-Cohen 1889 (Approved Lists 1980); NBRC 15319; VKM B-1973; culture-collection:VKM:B:1973	annotated	Species	Bacteria; Actinobacteria; Micrococcales; Micrococcaceae; Arthrobacter	1663
218	521	tr|A0A5Q2FDH3|A0A5Q2FDH3_9ACTN	5	1749	Phosphoesterase OS=Raineyella sp. CBA3103 OX=2662261 GN=Rai3103_07110 PE=4 SV=1	2662261	2	NA	2	7	3	4	A0A5Q2FDH3		Raineyella sp. CBA3103				annotated	Species	Bacteria; Actinobacteria; Propionibacteriales; Propionibacteriaceae; Raineyella	2662260
249	85	tr|A0A1H9GR64|A0A1H9GR64_9PSEU	2	1947	Uncharacterized protein OS=Lentzea albida OX=65499 GN=SAMN04488000_103239 PE=4 SV=1	65499	NA	NA	NA	3	NA	NA	A0A1H9GR64		Lentzea albida			"Asiosporangium albidum" Runmao et al.; "Streptomyces staurosporeus" Omura et al. 1977; Asiosporangium albidum; DSM 44437; IFO 16102; JCM 10670; Lentzea albida Labeda et al. 2001; Lentzea albida Labeda et al. 2001 emend. Nouioui et al. 2018; NBRC 16102; NRRL B-24073; Saccharothrix aerocolonigenes subsp staurosporea corrig (ex Omura et al '77) Takahashi et al'96; Saccharothrix aerocolonigenes subs…	annotated	Species	Bacteria; Actinobacteria; Pseudonocardiales; Pseudonocardiaceae; Lentzea	165301
329	347	tr|A0A2W6DR51|A0A2W6DR51_9PSEU	2	2651	Phosphodiesterase OS=Pseudonocardiales bacterium OX=2201155 GN=DLM61_17400 PE=4 SV=1	2201155	NA	NA	NA	2	NA	2	A0A2W6DR51		Pseudonocardiales bacterium				annotated	Species	Bacteria; Actinobacteria; Pseudonocardiales; unclassified Pseudonocardiales	664783
277	114	tr|A0A1X7DIP4|A0A1X7DIP4_9ACTN	4	2205	Elongation factor Tu OS=Streptomyces sp. Amel2xC10 OX=1305826 GN=tuf PE=3 SV=1	1305826	NA	NA	NA	2	NA	NA	A0A1X7DIP4		Streptomyces sp. Amel2xC10				annotated	Species	Bacteria; Actinobacteria; Streptomycetales; Streptomycetaceae; Streptomyces	2593676
122	415	tr|A0A402CYT0|A0A402CYT0_9BACT	5	968	SLH domain-containing protein OS=Capsulimonas corticalis OX=2219043 GN=CCAX7_36180 PE=4 SV=1	2219043	4	NA	5	7	15	3	A0A402CYT0		Capsulimonas corticalis			Armatimonadia bacterium AX-7; Capsulimonas corticalis Li et al. 2019; DSM 105890; NBRC 113044; strain AX-7	annotated	Species	Bacteria; Armatimonadetes; Armatimonadia; Capsulimonadales; Capsulimonadaceae; Capsulimonas	2494209
180	416	tr|A0A402D103|A0A402D103_9BACT	6	1445	RNA-binding protein OS=Capsulimonas corticalis OX=2219043 GN=CCAX7_43620 PE=4 SV=1	2219043	5	2	4	8	2	2	A0A402D103		Capsulimonas corticalis			Armatimonadia bacterium AX-7; Capsulimonas corticalis Li et al. 2019; DSM 105890; NBRC 113044; strain AX-7	annotated	Species	Bacteria; Armatimonadetes; Armatimonadia; Capsulimonadales; Capsulimonadaceae; Capsulimonas	2494209
255	417	tr|A0A402D124|A0A402D124_9BACT	3	1980	60 kDa chaperonin OS=Capsulimonas corticalis OX=2219043 GN=groL PE=3 SV=1	2219043	NA	2	NA	NA	6	4	A0A402D124		Capsulimonas corticalis			Armatimonadia bacterium AX-7; Capsulimonas corticalis Li et al. 2019; DSM 105890; NBRC 113044; strain AX-7	annotated	Species	Bacteria; Armatimonadetes; Armatimonadia; Capsulimonadales; Capsulimonadaceae; Capsulimonas	2494209
233	515	tr|A0A5J5IGS5|A0A5J5IGS5_9BACT	3	1829	SusC/RagA family TonB-linked outer membrane protein OS=Chitinophagaceae bacterium BR5-29 OX=2607284 GN=FW778_15595 PE=3 SV=1	2607284	NA	NA	3	5	7	NA	A0A5J5IGS5		Ginsengibacter hankyongi			"Ginsengibacter hankyongi" Siddiqi et al. 2021; Chitinophagaceae bacterium BR5-29; KACC 19446; LMG 30462; LMG:30462; strain BR5-29	annotated	Species	Bacteria; Bacteroidetes; Chitinophagia; Chitinophagales; Chitinophagaceae; Ginsengibacter	2806031
336	516	tr|A0A5J5IIH8|A0A5J5IIH8_9BACT	3	2727	TonB-dependent receptor OS=Chitinophagaceae bacterium BR5-29 OX=2607284 GN=FW778_01460 PE=4 SV=1	2607284	NA	2	2	3	NA	NA	A0A5J5IIH8		Ginsengibacter hankyongi			"Ginsengibacter hankyongi" Siddiqi et al. 2021; Chitinophagaceae bacterium BR5-29; KACC 19446; LMG 30462; LMG:30462; strain BR5-29	annotated	Species	Bacteria; Bacteroidetes; Chitinophagia; Chitinophagales; Chitinophagaceae; Ginsengibacter	2806031
223	113	tr|A0A1V9F312|A0A1V9F312_9BACT	4	1772	Uncharacterized protein OS=Niastella yeongjuensis OX=354355 GN=A4H97_24135 PE=4 SV=1	354355	3	5	4	4	NA	NA	A0A1V9F312		Niastella yeongjuensis			DSM 17621; KACC 11466; Niastella jeongjuensis; Niastella yeongjuensis Weon et al. 2006; strain GR20-13	annotated	Species	Bacteria; Bacteroidetes; Chitinophagia; Chitinophagales; Chitinophagaceae; Niastella	354354
171	498	tr|A0A5B8VD51|A0A5B8VD51_9BACT	5	1356	SusC/RagA family TonB-linked outer membrane protein OS=Panacibacter ginsenosidivorans OX=1813871 GN=FRZ67_13130 PE=3 SV=1	1813871	3	5	4	NA	5	6	A0A5B8VD51		Panacibacter ginsenosidivorans			Chitinophagaceae bacterium Gsoil 1550; JCM 31452; KCTC 12658; Panacibacter ginsenosidivorans Siddiqi et al. 2016; strain Gsoil 1550	annotated	Species	Bacteria; Bacteroidetes; Chitinophagia; Chitinophagales; Chitinophagaceae; Panacibacter	1874621
45	370	tr|A0A2Z3GQB7|A0A2Z3GQB7_9BACT	5	387	Uncharacterized protein OS=Hymenobacter nivis OX=1850093 GN=DDQ68_14520 PE=4 SV=1	1850093	5	NA	7	15	11	44	A0A2Z3GQB7		Hymenobacter nivis			DSM 101755; Hymenobacter nivis Kojima et al. 2016; Hymenobacter sp. NBRC 111535; NBRC 111535; strain P3	annotated	Species	Bacteria; Bacteroidetes; Cytophagia; Cytophagales; Hymenobacteraceae; Hymenobacter	89966
182	365	tr|A0A2Z3GHE9|A0A2Z3GHE9_9BACT	5	1460	Por_Secre_tail domain-containing protein OS=Hymenobacter nivis OX=1850093 GN=DDQ68_01790 PE=4 SV=1	1850093	4	3	NA	5	3	6	A0A2Z3GHE9		Hymenobacter nivis			DSM 101755; Hymenobacter nivis Kojima et al. 2016; Hymenobacter sp. NBRC 111535; NBRC 111535; strain P3	annotated	Species	Bacteria; Bacteroidetes; Cytophagia; Cytophagales; Hymenobacteraceae; Hymenobacter	89966
203	367	tr|A0A2Z3GJP7|A0A2Z3GJP7_9BACT	4	1657	OmpA-like domain-containing protein OS=Hymenobacter nivis OX=1850093 GN=DDQ68_03400 PE=4 SV=1	1850093	2	NA	6	7	3	NA	A0A2Z3GJP7		Hymenobacter nivis			DSM 101755; Hymenobacter nivis Kojima et al. 2016; Hymenobacter sp. NBRC 111535; NBRC 111535; strain P3	annotated	Species	Bacteria; Bacteroidetes; Cytophagia; Cytophagales; Hymenobacteraceae; Hymenobacter	89966
216	368	tr|A0A2Z3GK84|A0A2Z3GK84_9BACT	3	1742	OMP_b-brl_2 domain-containing protein OS=Hymenobacter nivis OX=1850093 GN=DDQ68_18570 PE=4 SV=1	1850093	NA	NA	NA	4	11	2	A0A2Z3GK84		Hymenobacter nivis			DSM 101755; Hymenobacter nivis Kojima et al. 2016; Hymenobacter sp. NBRC 111535; NBRC 111535; strain P3	annotated	Species	Bacteria; Bacteroidetes; Cytophagia; Cytophagales; Hymenobacteraceae; Hymenobacter	89966
221	56	tr|A0A126PDU0|A0A126PDU0_9BACT	3	1765	Uncharacterized protein OS=Hymenobacter sp. PAMC 26628 OX=1484118 GN=AXW84_13055 PE=3 SV=1	1484118	NA	NA	2	NA	8	6	A0A126PDU0		Hymenobacter sp. PAMC 26628			Hymenobacter sp. PAMC26628	annotated	Species	Bacteria; Bacteroidetes; Cytophagia; Cytophagales; Hymenobacteraceae; Hymenobacter	2615202
241	369	tr|A0A2Z3GLB4|A0A2Z3GLB4_9BACT	3	1900	SusC/RagA family TonB-linked outer membrane protein OS=Hymenobacter nivis OX=1850093 GN=DDQ68_20900 PE=3 SV=1	1850093	NA	NA	NA	2	9	4	A0A2Z3GLB4		Hymenobacter nivis			DSM 101755; Hymenobacter nivis Kojima et al. 2016; Hymenobacter sp. NBRC 111535; NBRC 111535; strain P3	annotated	Species	Bacteria; Bacteroidetes; Cytophagia; Cytophagales; Hymenobacteraceae; Hymenobacter	89966
243	472	tr|A0A4Z0PAC3|A0A4Z0PAC3_9BACT	3	1910	SusC/RagA family TonB-linked outer membrane protein OS=Hymenobacter sp. 92R-1 OX=2510796 GN=EU556_01600 PE=3 SV=1	2510796	NA	NA	NA	4	6	4	A0A4Z0PAC3		Hymenobacter sp. 92R-1				annotated	Species	Bacteria; Bacteroidetes; Cytophagia; Cytophagales; Hymenobacteraceae; Hymenobacter	2615202
274	371	tr|A0A2Z3GV62|A0A2Z3GV62_9BACT	2	2167	TonB-dependent receptor OS=Hymenobacter nivis OX=1850093 GN=DDQ68_20215 PE=4 SV=1	1850093	NA	NA	NA	5	6	NA	A0A2Z3GV62		Hymenobacter nivis			DSM 101755; Hymenobacter nivis Kojima et al. 2016; Hymenobacter sp. NBRC 111535; NBRC 111535; strain P3	annotated	Species	Bacteria; Bacteroidetes; Cytophagia; Cytophagales; Hymenobacteraceae; Hymenobacter	89966
275	366	tr|A0A2Z3GJ66|A0A2Z3GJ66_9BACT	3	2176	SusC/RagA family protein OS=Hymenobacter nivis OX=1850093 GN=DDQ68_05530 PE=3 SV=1	1850093	NA	NA	NA	2	4	5	A0A2Z3GJ66		Hymenobacter nivis			DSM 101755; Hymenobacter nivis Kojima et al. 2016; Hymenobacter sp. NBRC 111535; NBRC 111535; strain P3	annotated	Species	Bacteria; Bacteroidetes; Cytophagia; Cytophagales; Hymenobacteraceae; Hymenobacter	89966
282	573	tr|A0A7D4B8G3|A0A7D4B8G3_9BACT	3	2260	SusC/RagA family TonB-linked outer membrane protein OS=Hymenobacter sp. BRD128 OX=2675878 GN=GKZ68_08090 PE=3 SV=1	2675878	NA	NA	NA	2	3	5	A0A7D4B8G3		Hymenobacter sp. BRD128				annotated	Species	Bacteria; Bacteroidetes; Cytophagia; Cytophagales; Hymenobacteraceae; Hymenobacter	2615202
301	49	tr|A0A0U3SWK4|A0A0U3SWK4_9BACT	2	2408	SusC/RagA family TonB-linked outer membrane protein OS=Hymenobacter sedentarius OX=1411621 GN=AUC43_07310 PE=3 SV=1	1411621	NA	NA	NA	2	6	NA	A0A0U3SWK4		Hymenobacter sedentarius			Hymenobacter sedentarius Lee et al. 2016; Hymenobacter sp. DG5B; JCM 19636; KCTC 32524; strain DG5B	annotated	Species	Bacteria; Bacteroidetes; Cytophagia; Cytophagales; Hymenobacteraceae; Hymenobacter	89966
306	55	tr|A0A126P6U4|A0A126P6U4_9BACT	2	2455	Uncharacterized protein OS=Hymenobacter sp. PAMC 26628 OX=1484118 GN=AXW84_04365 PE=4 SV=1	1484118	NA	NA	NA	2	6	NA	A0A126P6U4		Hymenobacter sp. PAMC 26628			Hymenobacter sp. PAMC26628	annotated	Species	Bacteria; Bacteroidetes; Cytophagia; Cytophagales; Hymenobacteraceae; Hymenobacter	2615202
313	5	tr|A0A076HPL4|A0A076HPL4_9BACT	2	2557	Uncharacterized protein OS=Hymenobacter sp. APR13 OX=1356852 GN=N008_04050 PE=4 SV=1	1356852	NA	NA	NA	2	5	NA	A0A076HPL4		Hymenobacter sp. APR13				annotated	Species	Bacteria; Bacteroidetes; Cytophagia; Cytophagales; Hymenobacteraceae; Hymenobacter	2615202
315	57	tr|A0A126PGJ2|A0A126PGJ2_9BACT	2	2568	SusC/RagA family TonB-linked outer membrane protein OS=Hymenobacter sp. PAMC 26628 OX=1484118 GN=AXW84_16125 PE=3 SV=1	1484118	NA	NA	NA	2	5	NA	A0A126PGJ2		Hymenobacter sp. PAMC 26628			Hymenobacter sp. PAMC26628	annotated	Species	Bacteria; Bacteroidetes; Cytophagia; Cytophagales; Hymenobacteraceae; Hymenobacter	2615202
355	478	tr|A0A519T900|A0A519T900_9BACT	2	2880	Ferritin-like domain-containing protein OS=Hymenobacter sp. OX=1898978 GN=EOO63_03900 PE=4 SV=1	1898978	NA	NA	NA	NA	3	2	A0A519T900		Hymenobacter sp.				annotated	Species	Bacteria; Bacteroidetes; Cytophagia; Cytophagales; Hymenobacteraceae; Hymenobacter	2615202
158	89	tr|A0A1I6A7Q2|A0A1I6A7Q2_9BACT	4	1275	TonB-linked outer membrane protein SusC/RagA family OS=Siccationidurans arizonensis OX=1227077 GN=SAMN04515668_3395 PE=3 SV=1	1227077	NA	NA	2	6	11	6	A0A1I6A7Q2		Siccationidurans arizonensis			"Siccationidurans arizonensis" (Reddy and Garcia-Pichel 2013) Reddy 2013; ATCC BAA-1266; DSM 17870; Hymenobacter arizonensis; Hymenobacter arizonensis Reddy and Garcia-Pichel 2013; Hymenobacter sp. OR362-8; JCM 13504; culture-collection:ATCC:BAA:1266; strain OR362-8	annotated	Species	Bacteria; Bacteroidetes; Cytophagia; Cytophagales; Hymenobacteraceae; Siccationidurans	1968878
338	413	tr|A0A3S0FAN3|A0A3S0FAN3_9SPHI	2	2747	DUF4331 domain-containing protein OS=Sphingobacteriales bacterium OX=2044944 GN=EKK37_13365 PE=4 SV=1	2044944	NA	NA	NA	2	NA	4	A0A3S0FAN3		Sphingobacteriales bacterium				annotated	Species	Bacteria; Bacteroidetes; Sphingobacteriia; Sphingobacteriales	203473
347	145	tr|A0A223NUL7|A0A223NUL7_9SPHI	2	2849	RagB/SusD family nutrient uptake outer membrane protein OS=Mucilaginibacter xinganensis OX=1234841 GN=MuYL_1661 PE=3 SV=1	1234841	NA	NA	NA	NA	3	3	A0A223NUL7		Mucilaginibacter xinganensis			"Mucilaginibacter xinganensis" Jiang et al. 2019; CGMCC 1.12728; Mucilaginibacter sp. BJC16-A31; NBRC 110384; strain BJC16-A31	annotated	Species	Bacteria; Bacteroidetes; Sphingobacteriia; Sphingobacteriales; Sphingobacteriaceae; Mucilaginibacter	423349
258	82	tr|A0A1H0WUC7|A0A1H0WUC7_9SPHI	3	1994	OmpA-OmpF porin OOP family OS=Mucilaginibacter sp. OK268 OX=1881048 GN=SAMN05428975_3912 PE=4 SV=1	1881048	NA	NA	NA	2	4	6	A0A1H0WUC7		Mucilaginibacter sp. OK268				annotated	Species	Bacteria; Bacteroidetes; Sphingobacteriia; Sphingobacteriales; Sphingobacteriaceae; Mucilaginibacter; unclassified Mucilaginibacter	2617802
257	479	tr|A0A519UCI1|A0A519UCI1_9SPHI	6	1993	SusC/RagA family protein (Fragment) OS=Pedobacter sp. OX=1411316 GN=EOO94_04795 PE=4 SV=1	1411316	2	2	4	2	2	2	A0A519UCI1		Pedobacter sp.				annotated	Species	Bacteria; Bacteroidetes; Sphingobacteriia; Sphingobacteriales; Sphingobacteriaceae; Pedobacter; unclassified Pedobacter	2628915
69	344	tr|A0A2W5XGX1|A0A2W5XGX1_9BACT	5	522	60 kDa chaperonin OS=Candidatus Eremiobacteraeota bacterium OX=2052317 GN=groL PE=3 SV=1	2052317	7	23	5	4	18	NA	A0A2W5XGX1		Candidatus Eremiobacteraeota bacterium			candidate division WPS-2 bacterium	annotated	Species	Bacteria; Candidatus Eremiobacteraeota; unclassified Candidatus Eremiobacteraeota	2599633
70	345	tr|A0A2W5Y101|A0A2W5Y101_9BACT	6	540	Cu_amine_oxidN1 domain-containing protein OS=Candidatus Eremiobacteraeota bacterium OX=2052317 GN=DLM50_07705 PE=4 SV=1	2052317	11	14	10	6	6	11	A0A2W5Y101		Candidatus Eremiobacteraeota bacterium			candidate division WPS-2 bacterium	annotated	Species	Bacteria; Candidatus Eremiobacteraeota; unclassified Candidatus Eremiobacteraeota	2599633
323	346	tr|A0A2W5YQ75|A0A2W5YQ75_9BACT	2	2624	Uncharacterized protein OS=Candidatus Eremiobacteraeota bacterium OX=2052317 GN=DLM50_05355 PE=4 SV=1	2052317	NA	2	NA	4	NA	NA	A0A2W5YQ75		Candidatus Eremiobacteraeota bacterium			candidate division WPS-2 bacterium	annotated	Species	Bacteria; Candidatus Eremiobacteraeota; unclassified Candidatus Eremiobacteraeota	2599633
333	78	tr|A0A1F5V1H1|A0A1F5V1H1_FRAXR	2	2700	Chaperone protein DnaK OS=Fraserbacteria sp. (strain RBG_16_55_9) OX=1817864 GN=dnaK PE=2 SV=1	1817864	NA	2	2	NA	NA	NA	A0A1F5V1H1	FRAXR	Fraserbacteria sp. (strain RBG_16_55_9)			Candidatus Fraserbacteria bacterium RBG_16_55_9	reviewed	Species	Bacteria; Candidatus Fraserbacteria	1817804
155	165	tr|A0A2E0L0L3|A0A2E0L0L3_9CHLR	4	1260	60 kDa chaperonin OS=Anaerolineaceae bacterium OX=2024896 GN=groL PE=3 SV=1	2024896	3	17	NA	NA	NA	2	A0A2E0L0L3		Anaerolineaceae bacterium				annotated	Species	Bacteria; Chloroflexi; Anaerolineae; Anaerolineales; Anaerolineaceae	1324991
116	420	tr|A0A426TSN7|A0A426TSN7_9CHLR	3	894	60 kDa chaperonin OS=Candidatus Viridilinea halotolerans OX=2491704 GN=groL PE=3 SV=1	2491704	NA	8	NA	NA	NA	NA	A0A426TSN7		Candidatus Viridilinea halotolerans			Candidatus Viridilinea halotolerans Grouzdev et al. 2019; Candidatus Viridilinea sp. Chok-6; Viridilinea halotolerans	annotated	Species	Bacteria; Chloroflexi; Chloroflexia; Chloroflexales; Chloroflexineae; Oscillochloridaceae; Candidatus Viridilinea	2491136
251	395	tr|A0A3D2J724|A0A3D2J724_9CHLR	4	1951	ATP synthase subunit alpha OS=Ktedonobacter sp. OX=1932716 GN=atpA PE=3 SV=1	1932716	NA	4	NA	NA	2	NA	A0A3D2J724		Ktedonobacter sp.				annotated	Species	Bacteria; Chloroflexi; Ktedonobacteria; Ktedonobacterales; Ktedonobacteraceae; Ktedonobacter; unclassified Ktedonobacter	388461
328	106	tr|A0A1Q6Y8N4|A0A1Q6Y8N4_9CHLR	2	2649	Dihydroxyacetone kinase subunit DhaK OS=Ktedonobacter sp. 13_2_20CM_53_11 OX=1805233 GN=AUH05_16755 PE=4 SV=1	1805233	3	5	NA	NA	NA	NA	A0A1Q6Y8N4		Ktedonobacter sp. 13_2_20CM_53_11				annotated	Species	Bacteria; Chloroflexi; Ktedonobacteria; Ktedonobacterales; Ktedonobacteraceae; Ktedonobacter; unclassified Ktedonobacter	388461
362	376	tr|A0A326UG67|A0A326UG67_9CHLR	2	3028	10 kDa chaperonin OS=Thermosporothrix hazakensis OX=644383 GN=groS PE=3 SV=1	644383	2	2	NA	NA	NA	NA	A0A326UG67		Thermosporothrix hazakensis			ATCC BAA-1881; ATCC:BAA:1881; JCM 16142; Ktedobacteria bacterium SK20-1; Ktedonobacteria bacterium SK20-1; Thermosporothrix hazakensis Yabe et al. 2010; strain SK20-1	annotated	Species	Bacteria; Chloroflexi; Ktedonobacteria; Ktedonobacterales; Thermosporotrichaceae; Thermosporothrix	768650
16	308	tr|A0A2T1DTX6|A0A2T1DTX6_9CYAN	9	162	ATP synthase subunit beta OS=filamentous cyanobacterium Phorm 46 OX=2107705 GN=atpD PE=3 SV=1	2107705	NA	3	10	2	5	NA	A0A2T1DTX6		filamentous cyanobacterium Phorm 46				annotated	Species	Bacteria; Cyanobacteria	1983111
21	313	tr|A0A2T1E7R4|A0A2T1E7R4_9CYAN	9	244	Porin OS=filamentous cyanobacterium Phorm 46 OX=2107705 GN=C7B69_09895 PE=3 SV=1	2107705	9	8	12	8	7	NA	A0A2T1E7R4		filamentous cyanobacterium Phorm 46				annotated	Species	Bacteria; Cyanobacteria	1983111
48	312	tr|A0A2T1E4K7|A0A2T1E4K7_9CYAN	9	405	Porin OS=filamentous cyanobacterium Phorm 46 OX=2107705 GN=C7B69_10520 PE=3 SV=1	2107705	9	8	12	8	7	NA	A0A2T1E4K7		filamentous cyanobacterium Phorm 46				annotated	Species	Bacteria; Cyanobacteria	1983111
62	322	tr|A0A2T1F559|A0A2T1F559_9CYAN	5	493	Probable phosphoketolase OS=filamentous cyanobacterium Phorm 46 OX=2107705 GN=C7B69_00155 PE=3 SV=1	2107705	16	37	4	2	2	NA	A0A2T1F559		filamentous cyanobacterium Phorm 46				annotated	Species	Bacteria; Cyanobacteria	1983111
64	310	tr|A0A2T1DYZ8|A0A2T1DYZ8_9CYAN	4	505	Carbon dioxide-concentrating mechanism protein CcmK OS=filamentous cyanobacterium Phorm 46 OX=2107705 GN=C7B69_12330 PE=3 SV=1	2107705	NA	NA	3	NA	NA	NA	A0A2T1DYZ8		filamentous cyanobacterium Phorm 46				annotated	Species	Bacteria; Cyanobacteria	1983111
92	325	tr|A0A2T1FIY8|A0A2T1FIY8_9CYAN	5	694	Polyribonucleotide nucleotidyltransferase OS=filamentous cyanobacterium Phorm 6 OX=2107706 GN=pnp PE=3 SV=1	2107706	2	3	NA	NA	NA	NA	A0A2T1FIY8		filamentous cyanobacterium Phorm 6				annotated	Species	Bacteria; Cyanobacteria	1983111
134	316	tr|A0A2T1EMH6|A0A2T1EMH6_9CYAN	4	1063	Bicarbonate-binding protein OS=filamentous cyanobacterium Phorm 46 OX=2107705 GN=C7B69_06370 PE=3 SV=1	2107705	2	2	NA	NA	NA	NA	A0A2T1EMH6		filamentous cyanobacterium Phorm 46				annotated	Species	Bacteria; Cyanobacteria	1983111
160	321	tr|A0A2T1EVB5|A0A2T1EVB5_9CYAN	4	1280	30S ribosomal protein S9 OS=filamentous cyanobacterium Phorm 46 OX=2107705 GN=rpsI PE=3 SV=1	2107705	2	NA	NA	NA	NA	NA	A0A2T1EVB5		filamentous cyanobacterium Phorm 46				annotated	Species	Bacteria; Cyanobacteria	1983111
176	221	tr|A0A2T1DCM7|A0A2T1DCM7_9CYAN	3	1414	Photosystem reaction center subunit H OS=filamentous cyanobacterium CCP2 OX=2107700 GN=C7B76_08510 PE=4 SV=1	2107700	3	NA	NA	NA	NA	NA	A0A2T1DCM7		filamentous cyanobacterium CCP2				annotated	Species	Bacteria; Cyanobacteria	1983111
189	328	tr|A0A2T1FQI5|A0A2T1FQI5_9CYAN	4	1515	DNA-directed RNA polymerase subunit beta' OS=filamentous cyanobacterium Phorm 6 OX=2107706 GN=rpoC2 PE=3 SV=1	2107706	NA	7	2	NA	NA	NA	A0A2T1FQI5		filamentous cyanobacterium Phorm 6				annotated	Species	Bacteria; Cyanobacteria	1983111
272	326	tr|A0A2T1FK22|A0A2T1FK22_9CYAN	3	2132	50S ribosomal protein L4 OS=filamentous cyanobacterium Phorm 6 OX=2107706 GN=rplD PE=3 SV=1	2107706	NA	2	NA	NA	NA	NA	A0A2T1FK22		filamentous cyanobacterium Phorm 6				annotated	Species	Bacteria; Cyanobacteria	1983111
296	319	tr|A0A2T1EV35|A0A2T1EV35_9CYAN	2	2385	DNA-directed RNA polymerase subunit alpha OS=filamentous cyanobacterium Phorm 46 OX=2107705 GN=rpoA PE=3 SV=1	2107705	NA	3	NA	NA	NA	NA	A0A2T1EV35		filamentous cyanobacterium Phorm 46				annotated	Species	Bacteria; Cyanobacteria	1983111
340	6	tr|A0A077JHA5|A0A077JHA5_9CYAN	2	2756	Nitrogen-responsive regulatory protein OS=cyanobacterium endosymbiont of Epithemia turgida isolate EtSB Lake Yunoko OX=1228987 GN=ntcA PE=4 SV=1	1228987	NA	2	NA	NA	NA	NA	A0A077JHA5		cyanobacterium endosymbiont of Epithemia turgida isolate EtSB Lake Yunoko				annotated		Bacteria; Cyanobacteria	718217
170	20	tr|A0A0D8ZWM1|A0A0D8ZWM1_9CYAN	5	1355	Membrane protein OS=Aliterella atlantica CENA595 OX=1618023 GN=UH38_11225 PE=3 SV=1	1618023	5	9	4	2	3	NA	A0A0D8ZWM1		Aliterella atlantica CENA595			Chroococcales cyanobacterium CENA595	annotated		Bacteria; Cyanobacteria; Chroococcidiopsidales; Chroococcidiopsidaceae; Aliterella	1827278
252	21	tr|A0A0D8ZX73|A0A0D8ZX73_9CYAN	5	1958	Phospholipid-binding protein OS=Aliterella atlantica CENA595 OX=1618023 GN=UH38_00850 PE=4 SV=1	1618023	2	NA	2	2	NA	NA	A0A0D8ZX73		Aliterella atlantica CENA595			Chroococcales cyanobacterium CENA595	annotated		Bacteria; Cyanobacteria; Chroococcidiopsidales; Chroococcidiopsidaceae; Aliterella	1827278
138	15	tr|A0A0B0QTB3|A0A0B0QTB3_APHF2	4	1101	Carbon dioxide-concentrating protein CcmK OS=Aphanizomenon flos-aquae (strain 2012/KM1/D3) OX=1532906 GN=OA07_12830 PE=3 SV=1	1532906	NA	5	3	NA	NA	NA	A0A0B0QTB3	APHF2	Aphanizomenon flos-aquae (strain 2012/KM1/D3)			Aphanizomenon flos-aquae 2012-KM1-D3; Aphanizomenon flos-aquae 2012/KM/D3; Aphanizomenon flos-aquae 2012/KM1/D3	reviewed		Bacteria; Cyanobacteria; Nostocales; Aphanizomenonaceae; Aphanizomenon	1176
154	14	tr|A0A0B0QSG2|A0A0B0QSG2_APHF2	3	1249	DNA-directed RNA polymerase subunit gamma OS=Aphanizomenon flos-aquae (strain 2012/KM1/D3) OX=1532906 GN=rpoC1 PE=3 SV=1	1532906	NA	6	NA	NA	NA	NA	A0A0B0QSG2	APHF2	Aphanizomenon flos-aquae (strain 2012/KM1/D3)			Aphanizomenon flos-aquae 2012-KM1-D3; Aphanizomenon flos-aquae 2012/KM/D3; Aphanizomenon flos-aquae 2012/KM1/D3	reviewed		Bacteria; Cyanobacteria; Nostocales; Aphanizomenonaceae; Aphanizomenon	1176
141	42	tr|A0A0R0MH59|A0A0R0MH59_9CYAN	3	1142	XRE family transcriptional regulator OS=Cylindrospermopsis sp. CR12 OX=1747196 GN=ASL19_05390 PE=4 SV=1	1747196	NA	9	NA	NA	NA	NA	A0A0R0MH59		Cylindrospermopsis sp. CR12				annotated	Species	Bacteria; Cyanobacteria; Nostocales; Aphanizomenonaceae; Cylindrospermopsis; unclassified Cylindrospermopsis	2620023
342	142	tr|A0A218Q6H0|A0A218Q6H0_9CYAN	2	2803	Potassium-transporting ATPase ATP-binding subunit OS=Nodularia sp. NIES-3585 OX=1973477 GN=kdpB PE=3 SV=1	1973477	NA	2	3	NA	NA	NA	A0A218Q6H0		Nodularia sp. NIES-3585				annotated	Species	Bacteria; Cyanobacteria; Nostocales; Aphanizomenonaceae; Nodularia	2656917
110	164	tr|A0A2A2TPX3|A0A2A2TPX3_9CYAN	7	842	Fasciclin OS=Calothrix elsteri CCALA 953 OX=987040 GN=CK510_01420 PE=4 SV=1	987040	6	4	7	5	3	NA	A0A2A2TPX3		Calothrix elsteri CCALA 953			Calothrix sp. CCALA 953; Calothrix sp. CCALA953	annotated		Bacteria; Cyanobacteria; Nostocales; Calotrichaceae; Calothrix	1247191
266	70	tr|A0A1B7WNC1|A0A1B7WNC1_9NOST	4	2059	Translation initiation factor IF-1 OS=Anabaena sp. CRKS33 OX=1710888 GN=infA PE=3 SV=1	1710888	4	4	3	NA	NA	NA	A0A1B7WNC1		Anabaena sp. CRKS33			Anabaena sp. Cheney33	annotated	Species	Bacteria; Cyanobacteria; Nostocales; Nostocaceae; Anabaena; unclassified Anabaena	2619674
297	24	tr|A0A0K2LVT4|A0A0K2LVT4_9NOST	3	2389	Peptidyl-prolyl cis-trans isomerase OS=Anabaena sp. WA102 OX=1647413 GN=AA650_05135 PE=3 SV=1	1647413	2	NA	4	NA	NA	NA	A0A0K2LVT4		Anabaena sp. WA102				annotated	Species	Bacteria; Cyanobacteria; Nostocales; Nostocaceae; Anabaena; unclassified Anabaena	2619674
229	132	tr|A0A1Z4QQK5|A0A1Z4QQK5_9NOST	5	1797	30S ribosomal protein S5 OS=Cylindrospermum sp. NIES-4074 OX=2005457 GN=rpsE PE=3 SV=1	2005457	4	2	4	NA	NA	NA	A0A1Z4QQK5		Cylindrospermum sp. NIES-4074				annotated	Species	Bacteria; Cyanobacteria; Nostocales; Nostocaceae; Cylindrospermum; unclassified Cylindrospermum	2630404
67	134	tr|A0A1Z4SCH9|A0A1Z4SCH9_9NOSO	8	519	Chaperone protein DnaK OS=Nostoc sp. NIES-4103 OX=2005458 GN=dnaK PE=2 SV=1	2005458	7	12	5	5	5	NA	A0A1Z4SCH9		Nostoc sp. NIES-4103				annotated	Species	Bacteria; Cyanobacteria; Nostocales; Nostocaceae; Nostoc	2593658
165	382	tr|A0A367PYT2|A0A367PYT2_9NOSO	5	1329	Nucleoside diphosphate kinase OS=Nostoc sp. ATCC 43529 OX=1840705 GN=ndk PE=3 SV=1	1840705	NA	3	2	NA	2	NA	A0A367PYT2		Nostoc sp. ATCC 43529			Nostoc sp. CPB 755	annotated	Species	Bacteria; Cyanobacteria; Nostocales; Nostocaceae; Nostoc	2593658
185	27	tr|A0A0M4SHD6|A0A0M4SHD6_9NOSO	5	1491	Nucleoside diphosphate kinase OS=Nostoc piscinale CENA21 OX=224013 GN=ndk PE=3 SV=1	224013	NA	3	2	NA	2	NA	A0A0M4SHD6		Nostoc piscinale CENA21				annotated		Bacteria; Cyanobacteria; Nostocales; Nostocaceae; Nostoc	224012
304	149	tr|A0A235IZ84|A0A235IZ84_9NOSO	2	2435	Uncharacterized protein OS=Nostoc sp. 'Peltigera membranacea cyanobiont' 232 OX=2014531 GN=CDG79_19190 PE=4 SV=1	2014531	NA	4	3	NA	NA	NA	A0A235IZ84		Nostoc sp. 'Peltigera membranacea cyanobiont' 232			Nostoc sp. 'Peltigera membranacea cyanobiont' strain:232	annotated	Species	Bacteria; Cyanobacteria; Nostocales; Nostocaceae; Nostoc	2593658
20	632	tr|K9RJ43|K9RJ43_9CYAN	11	228	Secreted/surface protein with fasciclin-like repeats OS=Rivularia sp. PCC 7116 OX=373994 GN=Riv7116_5095 PE=4 SV=1	373994	14	12	22	13	8	8	K9RJ43		Rivularia sp. PCC 7116			Calothrix sp. ATCC 29111; Calothrix sp. PCC 7116; Rivularia sp. LIP	annotated	Species	Bacteria; Cyanobacteria; Nostocales; Rivulariaceae; Rivularia; unclassified Rivularia (in: Bacteria)	2676603
283	17	tr|A0A0C2MBX4|A0A0C2MBX4_9CYAN	3	2271	Bicarbonate-binding protein OS=Scytonema tolypothrichoides VB-61278 OX=1233231 GN=SD80_06765 PE=3 SV=1	1233231	2	3	NA	NA	NA	NA	A0A0C2MBX4		Scytonema tolypothrichoides VB-61278				annotated		Bacteria; Cyanobacteria; Nostocales; Scytonemataceae; Scytonema	1233230
250	18	tr|A0A0C2PMZ2|A0A0C2PMZ2_9CYAN	2	1948	Peptidase S8 OS=Tolypothrix campylonemoides VB511288 OX=1245935 GN=SD81_36100 PE=4 SV=1	1245935	NA	12	3	NA	NA	NA	A0A0C2PMZ2		Tolypothrix campylonemoides VB511288				annotated		Bacteria; Cyanobacteria; Nostocales; Tolypothrichaceae; Tolypothrix	1136105
183	144	tr|A0A218QJR2|A0A218QJR2_9CYAN	4	1477	Photosystem I reaction center subunit II OS=Tolypothrix sp. NIES-4075 OX=2005459 GN=NIES4075_30040 PE=3 SV=1	2005459	3	NA	2	NA	NA	NA	A0A218QJR2		Tolypothrix sp. NIES-4075				annotated	Species	Bacteria; Cyanobacteria; Nostocales; Tolypothrichaceae; Tolypothrix; unclassified Tolypothrix	2649714
26	497	tr|A0A5B8NLT6|A0A5B8NLT6_9CHRO	9	272	60 kDa chaperonin OS=Euhalothece natronophila Z-M001 OX=522448 GN=groL PE=3 SV=1	522448	9	16	20	10	7	NA	A0A5B8NLT6		Euhalothece natronophila Z-M001			Euhalothece sp. Z-M001	annotated		Bacteria; Cyanobacteria; Oscillatoriophycideae; Chroococcales; Aphanothecaceae; Halothece cluster; Euhalothece	577489
140	111	tr|A0A1U7HZN4|A0A1U7HZN4_9CHRO	7	1133	Carbon dioxide-concentrating protein CcmK OS=Chroogloeocystis siderophila 5.2 s.c.1 OX=247279 GN=NIES1031_00490 PE=3 SV=1	247279	2	8	6	NA	2	NA	A0A1U7HZN4		Chroogloeocystis siderophila 5.2 s.c.1			Chroogloeocystis siderophila NIES-1031; cyanobacterium 5.2 s.c. 1; cyanobacterium 5.2 s.c.1; unidentified bacterium ATCC BAA-845	annotated		Bacteria; Cyanobacteria; Oscillatoriophycideae; Chroococcales; Chroococcaceae; Chroogloeocystis	329163
341	635	tr|K9SA05|K9SA05_9CYAN	2	2760	Argininosuccinate synthase OS=Geitlerinema sp. PCC 7407 OX=1173025 GN=argG PE=3 SV=1	1173025	NA	2	NA	NA	NA	NA	K9SA05		Geitlerinema sp. PCC 7407			Geitlerinema sp. ATCC 29126; Geitlerinema sp. CPCC 99	annotated	Species	Bacteria; Cyanobacteria; Oscillatoriophycideae; Oscillatoriales; Coleofasciculaceae; Geitlerinema; unclassified Geitlerinema	2648775
38	649	tr|K9VTC0|K9VTC0_9CYAN	10	351	ATPase AAA-2 domain protein OS=Crinalium epipsammum PCC 9333 OX=1173022 GN=Cri9333_0177 PE=3 SV=1	1173022	2	10	6	2	2	NA	K9VTC0		Crinalium epipsammum PCC 9333			Crinalium sp. PCC 9333	annotated		Bacteria; Cyanobacteria; Oscillatoriophycideae; Oscillatoriales; Gomontiellaceae; Crinalium	241425
58	652	tr|K9VWJ1|K9VWJ1_9CYAN	6	457	60 kDa chaperonin OS=Crinalium epipsammum PCC 9333 OX=1173022 GN=groL PE=3 SV=1	1173022	NA	5	4	2	2	NA	K9VWJ1		Crinalium epipsammum PCC 9333			Crinalium sp. PCC 9333	annotated		Bacteria; Cyanobacteria; Oscillatoriophycideae; Oscillatoriales; Gomontiellaceae; Crinalium	241425
63	654	tr|K9VXY4|K9VXY4_9CYAN	7	504	ATP synthase subunit alpha OS=Crinalium epipsammum PCC 9333 OX=1173022 GN=atpA PE=3 SV=1	1173022	3	4	3	NA	5	NA	K9VXY4		Crinalium epipsammum PCC 9333			Crinalium sp. PCC 9333	annotated		Bacteria; Cyanobacteria; Oscillatoriophycideae; Oscillatoriales; Gomontiellaceae; Crinalium	241425
120	650	tr|K9VVC5|K9VVC5_9CYAN	3	954	Ferritin Dps family protein OS=Crinalium epipsammum PCC 9333 OX=1173022 GN=Cri9333_0110 PE=3 SV=1	1173022	NA	3	NA	NA	NA	NA	K9VVC5		Crinalium epipsammum PCC 9333			Crinalium sp. PCC 9333	annotated		Bacteria; Cyanobacteria; Oscillatoriophycideae; Oscillatoriales; Gomontiellaceae; Crinalium	241425
127	651	tr|K9VVF0|K9VVF0_9CYAN	3	1024	Fructose-1 6-bisphosphate aldolase OS=Crinalium epipsammum PCC 9333 OX=1173022 GN=Cri9333_1042 PE=3 SV=1	1173022	NA	2	NA	NA	NA	NA	K9VVF0		Crinalium epipsammum PCC 9333			Crinalium sp. PCC 9333	annotated		Bacteria; Cyanobacteria; Oscillatoriophycideae; Oscillatoriales; Gomontiellaceae; Crinalium	241425
130	663	tr|K9W1H0|K9W1H0_9CYAN	6	1041	RNP-1 like RNA-binding protein OS=Crinalium epipsammum PCC 9333 OX=1173022 GN=Cri9333_2725 PE=4 SV=1	1173022	3	4	5	4	NA	NA	K9W1H0		Crinalium epipsammum PCC 9333			Crinalium sp. PCC 9333	annotated		Bacteria; Cyanobacteria; Oscillatoriophycideae; Oscillatoriales; Gomontiellaceae; Crinalium	241425
144	661	tr|K9W095|K9W095_9CYAN	5	1173	DNA-directed RNA polymerase subunit alpha OS=Crinalium epipsammum PCC 9333 OX=1173022 GN=rpoA PE=3 SV=1	1173022	2	5	5	NA	NA	NA	K9W095		Crinalium epipsammum PCC 9333			Crinalium sp. PCC 9333	annotated		Bacteria; Cyanobacteria; Oscillatoriophycideae; Oscillatoriales; Gomontiellaceae; Crinalium	241425
162	660	tr|K9W094|K9W094_9CYAN	3	1323	Glyceraldehyde-3-phosphate dehydrogenase OS=Crinalium epipsammum PCC 9333 OX=1173022 GN=Cri9333_2336 PE=3 SV=1	1173022	NA	3	NA	NA	NA	NA	K9W094		Crinalium epipsammum PCC 9333			Crinalium sp. PCC 9333	annotated		Bacteria; Cyanobacteria; Oscillatoriophycideae; Oscillatoriales; Gomontiellaceae; Crinalium	241425
175	657	tr|K9VZI6|K9VZI6_9CYAN	3	1406	Photosystem I P700 chlorophyll a apoprotein A1 OS=Crinalium epipsammum PCC 9333 OX=1173022 GN=psaA PE=3 SV=1	1173022	NA	NA	NA	2	NA	NA	K9VZI6		Crinalium epipsammum PCC 9333			Crinalium sp. PCC 9333	annotated		Bacteria; Cyanobacteria; Oscillatoriophycideae; Oscillatoriales; Gomontiellaceae; Crinalium	241425
205	662	tr|K9W0X8|K9W0X8_9CYAN	3	1677	Urea-binding protein OS=Crinalium epipsammum PCC 9333 OX=1173022 GN=Cri9333_2546 PE=4 SV=1	1173022	NA	5	NA	NA	NA	NA	K9W0X8		Crinalium epipsammum PCC 9333			Crinalium sp. PCC 9333	annotated		Bacteria; Cyanobacteria; Oscillatoriophycideae; Oscillatoriales; Gomontiellaceae; Crinalium	241425
206	665	tr|K9W5Y7|K9W5Y7_9CYAN	3	1678	Rhodanese-like protein OS=Crinalium epipsammum PCC 9333 OX=1173022 GN=Cri9333_4426 PE=4 SV=1	1173022	2	NA	NA	NA	NA	NA	K9W5Y7		Crinalium epipsammum PCC 9333			Crinalium sp. PCC 9333	annotated		Bacteria; Cyanobacteria; Oscillatoriophycideae; Oscillatoriales; Gomontiellaceae; Crinalium	241425
213	655	tr|K9VY78|K9VY78_9CYAN	3	1732	Enolase OS=Crinalium epipsammum PCC 9333 OX=1173022 GN=eno PE=3 SV=1	1173022	NA	2	NA	NA	NA	NA	K9VY78		Crinalium epipsammum PCC 9333			Crinalium sp. PCC 9333	annotated		Bacteria; Cyanobacteria; Oscillatoriophycideae; Oscillatoriales; Gomontiellaceae; Crinalium	241425
219	664	tr|K9W2I2|K9W2I2_9CYAN	5	1751	Anti-sigma factor antagonist OS=Crinalium epipsammum PCC 9333 OX=1173022 GN=Cri9333_3134 PE=3 SV=1	1173022	2	2	7	NA	NA	NA	K9W2I2		Crinalium epipsammum PCC 9333			Crinalium sp. PCC 9333	annotated		Bacteria; Cyanobacteria; Oscillatoriophycideae; Oscillatoriales; Gomontiellaceae; Crinalium	241425
227	658	tr|K9VZS5|K9VZS5_9CYAN	4	1790	Cysteine synthase OS=Crinalium epipsammum PCC 9333 OX=1173022 GN=Cri9333_1780 PE=3 SV=1	1173022	2	NA	2	NA	NA	NA	K9VZS5		Crinalium epipsammum PCC 9333			Crinalium sp. PCC 9333	annotated		Bacteria; Cyanobacteria; Oscillatoriophycideae; Oscillatoriales; Gomontiellaceae; Crinalium	241425
293	659	tr|K9W058|K9W058_9CYAN	3	2325	50S ribosomal protein L15 OS=Crinalium epipsammum PCC 9333 OX=1173022 GN=rplO PE=3 SV=1	1173022	2	NA	3	NA	NA	NA	K9W058		Crinalium epipsammum PCC 9333			Crinalium sp. PCC 9333	annotated		Bacteria; Cyanobacteria; Oscillatoriophycideae; Oscillatoriales; Gomontiellaceae; Crinalium	241425
300	653	tr|K9VXM5|K9VXM5_9CYAN	3	2403	Photosystem I reaction center subunit II OS=Crinalium epipsammum PCC 9333 OX=1173022 GN=Cri9333_1826 PE=3 SV=1	1173022	3	NA	2	NA	NA	NA	K9VXM5		Crinalium epipsammum PCC 9333			Crinalium sp. PCC 9333	annotated		Bacteria; Cyanobacteria; Oscillatoriophycideae; Oscillatoriales; Gomontiellaceae; Crinalium	241425
77	523	tr|A0A5Q4HBV4|A0A5Q4HBV4_9CYAN	5	585	ATP synthase subunit beta OS=Arthrospira sp. PLM2.Bin9 OX=2599626 GN=atpD PE=3 SV=1	2599626	NA	NA	NA	NA	10	NA	A0A5Q4HBV4		Arthrospira sp. PLM2.Bin9				annotated	Species	Bacteria; Cyanobacteria; Oscillatoriophycideae; Oscillatoriales; Microcoleaceae; Arthrospira; unclassified Arthrospira	2638140
36	614	tr|F5UCR3|F5UCR3_9CYAN	8	343	ATP synthase subunit alpha OS=Microcoleus vaginatus FGP-2 OX=756067 GN=atpA PE=3 SV=1	756067	5	9	8	7	6	NA	F5UCR3		Microcoleus vaginatus FGP-2				annotated		Bacteria; Cyanobacteria; Oscillatoriophycideae; Oscillatoriales; Microcoleaceae; Microcoleus	119532
193	619	tr|F5UP33|F5UP33_9CYAN	4	1543	Photosystem II CP47 reaction center protein OS=Microcoleus vaginatus FGP-2 OX=756067 GN=psbB PE=3 SV=1	756067	NA	5	4	NA	NA	NA	F5UP33		Microcoleus vaginatus FGP-2				annotated		Bacteria; Cyanobacteria; Oscillatoriophycideae; Oscillatoriales; Microcoleaceae; Microcoleus	119532
345	93	tr|A0A1J1LRW1|A0A1J1LRW1_9CYAN	3	2845	UDP-glucuronate decarboxylase OS=Planktothrix tepida PCC 9214 OX=671072 GN=PL9214650381 PE=3 SV=1	671072	NA	2	NA	NA	NA	NA	A0A1J1LRW1		Planktothrix tepida PCC 9214			Oscillatoria sp. 4d.1; Oscillatoria sp. PCC 9214; Planktothrix sp. PCC 9214; Planktothrix tepida NIES-2870	annotated		Bacteria; Cyanobacteria; Oscillatoriophycideae; Oscillatoriales; Microcoleaceae; Planktothrix	1678309
51	174	tr|A0A2G4F432|A0A2G4F432_9CYAN	8	413	Chaperone protein DnaK OS=Tychonema bourrellyi FEM_GT703 OX=2040638 GN=dnaK PE=2 SV=1	2040638	4	14	3	3	8	NA	A0A2G4F432		Tychonema bourrellyi FEM_GT703				annotated		Bacteria; Cyanobacteria; Oscillatoriophycideae; Oscillatoriales; Microcoleaceae; Tychonema	54313
54	173	tr|A0A2G4F274|A0A2G4F274_9CYAN	9	430	Porin OS=Tychonema bourrellyi FEM_GT703 OX=2040638 GN=CP500_008415 PE=3 SV=1	2040638	9	8	13	8	7	NA	A0A2G4F274		Tychonema bourrellyi FEM_GT703				annotated		Bacteria; Cyanobacteria; Oscillatoriophycideae; Oscillatoriales; Microcoleaceae; Tychonema	54313
76	172	tr|A0A2G4EYE5|A0A2G4EYE5_9CYAN	8	582	30S ribosomal protein S1 OS=Tychonema bourrellyi FEM_GT703 OX=2040638 GN=CP500_015965 PE=4 SV=1	2040638	NA	3	5	3	3	NA	A0A2G4EYE5		Tychonema bourrellyi FEM_GT703				annotated		Bacteria; Cyanobacteria; Oscillatoriophycideae; Oscillatoriales; Microcoleaceae; Tychonema	54313
84	171	tr|A0A2G4EYB1|A0A2G4EYB1_9CYAN	8	660	Ribulose bisphosphate carboxylase large chain OS=Tychonema bourrellyi FEM_GT703 OX=2040638 GN=rbcL PE=3 SV=1	2040638	3	2	NA	3	NA	NA	A0A2G4EYB1		Tychonema bourrellyi FEM_GT703				annotated		Bacteria; Cyanobacteria; Oscillatoriophycideae; Oscillatoriales; Microcoleaceae; Tychonema	54313
105	170	tr|A0A2G4EV59|A0A2G4EV59_9CYAN	7	794	Beta-Ig-H3/fasciclin OS=Tychonema bourrellyi FEM_GT703 OX=2040638 GN=CP500_021865 PE=4 SV=1	2040638	11	8	9	3	2	NA	A0A2G4EV59		Tychonema bourrellyi FEM_GT703				annotated		Bacteria; Cyanobacteria; Oscillatoriophycideae; Oscillatoriales; Microcoleaceae; Tychonema	54313
31	677	tr|U7QGP0|U7QGP0_9CYAN	9	315	Allophycocyanin beta subunit OS=Lyngbya aestuarii BL J OX=1348334 GN=M595_2924 PE=3 SV=1	1348334	3	NA	5	5	4	2	U7QGP0		Lyngbya aestuarii BL J				annotated		Bacteria; Cyanobacteria; Oscillatoriophycideae; Oscillatoriales; Oscillatoriaceae; Lyngbya	118322
46	643	tr|K9VEZ1|K9VEZ1_9CYAN	9	389	Cyanobacterial porin OS=Oscillatoria nigro-viridis PCC 7112 OX=179408 GN=Osc7112_1546 PE=3 SV=1	179408	9	8	12	8	7	NA	K9VEZ1		Oscillatoria nigro-viridis PCC 7112			Oscillatoria PCC 7112; Oscillatoria PCC7112; Oscillatoria sp. PCC 7112; Oscillatoria sp. PCC7112	annotated		Bacteria; Cyanobacteria; Oscillatoriophycideae; Oscillatoriales; Oscillatoriaceae; Oscillatoria	482564
217	112	tr|A0A1U7J2T5|A0A1U7J2T5_9CYAN	5	1744	30S ribosomal protein S19 OS=Phormidium tenue NIES-30 OX=549789 GN=rpsS PE=3 SV=1	549789	3	3	7	NA	NA	NA	A0A1U7J2T5		Phormidium tenue NIES-30			Phormidium tenue IAM M-40	annotated		Bacteria; Cyanobacteria; Oscillatoriophycideae; Oscillatoriales; Oscillatoriaceae; Phormidium	126344
19	637	tr|K9TBE4|K9TBE4_9CYAN	11	189	Secreted/surface protein with fasciclin-like repeats OS=Pleurocapsa sp. PCC 7327 OX=118163 GN=Ple7327_4652 PE=4 SV=1	118163	19	21	29	16	9	8	K9TBE4		Pleurocapsa sp. PCC 7327			Pleurocapsa PCC7327; Pleurocapsa minor OH-69-pm; Pleurocapsa sp. ATCC 29393	annotated		Bacteria; Cyanobacteria; Pleurocapsales; Hyellaceae; Pleurocapsa	54308
8	332	tr|A0A2T1GDY1|A0A2T1GDY1_9CYAN	10	43	60 kDa chaperonin OS=Chamaesiphon polymorphus CCALA 037 OX=2107692 GN=groL PE=3 SV=1	2107692	20	30	33	14	18	NA	A0A2T1GDY1		Chamaesiphon polymorphus CCALA 037			Chamaesiphon polymorphus HINDAK 1984/5; Chamaesiphon polymorphus str. HINDAK 1984/5	annotated		Bacteria; Cyanobacteria; Synechococcales; Chamaesiphonaceae; Chamaesiphon	2107691
29	639	tr|K9UJ19|K9UJ19_CHAP6	6	292	Allophycocyanin alpha subunit apoprotein OS=Chamaesiphon minutus (strain ATCC 27169 / PCC 6605) OX=1173020 GN=Cha6605_3804 PE=3 SV=1	1173020	NA	NA	2	3	NA	NA	K9UJ19	CHAP6	Chamaesiphon minutus (strain ATCC 27169 / PCC 6605)			Chamaesiphon minutus PCC 6605; Chamaesiphon sp. ACMM 446; Chamaesiphon sp. ATCC 27169; Chamaesiphon sp. PCC 6605	reviewed		Bacteria; Cyanobacteria; Synechococcales; Chamaesiphonaceae; Chamaesiphon	1173032
72	641	tr|K9UMB4|K9UMB4_CHAP6	8	550	60 kDa chaperonin OS=Chamaesiphon minutus (strain ATCC 27169 / PCC 6605) OX=1173020 GN=groL PE=3 SV=1	1173020	NA	5	4	2	2	NA	K9UMB4	CHAP6	Chamaesiphon minutus (strain ATCC 27169 / PCC 6605)			Chamaesiphon minutus PCC 6605; Chamaesiphon sp. ACMM 446; Chamaesiphon sp. ATCC 27169; Chamaesiphon sp. PCC 6605	reviewed		Bacteria; Cyanobacteria; Synechococcales; Chamaesiphonaceae; Chamaesiphon	1173032
238	638	tr|K9UGN6|K9UGN6_CHAP6	4	1878	ATP-dependent Clp protease proteolytic subunit OS=Chamaesiphon minutus (strain ATCC 27169 / PCC 6605) OX=1173020 GN=Cha6605_2963 PE=3 SV=1	1173020	NA	3	3	NA	NA	NA	K9UGN6	CHAP6	Chamaesiphon minutus (strain ATCC 27169 / PCC 6605)			Chamaesiphon minutus PCC 6605; Chamaesiphon sp. ACMM 446; Chamaesiphon sp. ATCC 27169; Chamaesiphon sp. PCC 6605	reviewed		Bacteria; Cyanobacteria; Synechococcales; Chamaesiphonaceae; Chamaesiphon	1173032
288	156	tr|A0A251WLK8|A0A251WLK8_9CYAN	3	2299	Transporter OS=Alkalinema sp. CACIAM 70d OX=1934309 GN=B0A82_01660 PE=4 SV=1	1934309	5	3	3	NA	NA	NA	A0A251WLK8		Alkalinema sp. CACIAM 70d				annotated	Species	Bacteria; Cyanobacteria; Synechococcales; Leptolyngbyaceae; Alkalinema; unclassified Alkalinema	2635015
2	354	tr|A0A2W7ANV7|A0A2W7ANV7_9CYAN	10	4	60 kDa chaperonin OS=Leptolyngbya sp. OX=47254 GN=groL PE=3 SV=1	47254	34	38	43	15	22	NA	A0A2W7ANV7		Leptolyngbya sp.				annotated	Species	Bacteria; Cyanobacteria; Synechococcales; Leptolyngbyaceae; Leptolyngbya	2650499
11	32	tr|A0A0P4UKM5|A0A0P4UKM5_9CYAN	11	85	Phycocyanin beta chain OS=Leptolyngbya sp. NIES-2104 OX=1552121 GN=NIES2104_19250 PE=3 SV=1	1552121	18	22	41	31	27	13	A0A0P4UKM5		Leptolyngbya sp. NIES-2104				annotated	Species	Bacteria; Cyanobacteria; Synechococcales; Leptolyngbyaceae; Leptolyngbya	2650499
25	54	tr|A0A0X8WW16|A0A0X8WW16_9CYAN	9	268	Allophycocyanin alpha chain OS=Leptolyngbya sp. O-77 OX=1080068 GN=apcA PE=3 SV=1	1080068	10	28	25	12	16	8	A0A0X8WW16		Leptolyngbya sp. O-77				annotated	Species	Bacteria; Cyanobacteria; Synechococcales; Leptolyngbyaceae; Leptolyngbya	2650499
30	123	tr|A0A1Z4JFQ4|A0A1Z4JFQ4_LEPBY	9	297	Carbohydrate-selective porin OprB OS=Leptolyngbya boryana NIES-2135 OX=1973484 GN=NIES2135_23850 PE=3 SV=1	1973484	11	25	30	12	11	NA	A0A1Z4JFQ4		Leptolyngbya boryana NIES-2135				annotated		Bacteria; Cyanobacteria; Synechococcales; Leptolyngbyaceae; Leptolyngbya	1184
33	348	tr|A0A2W6ZT46|A0A2W6ZT46_9CYAN	9	323	ATP synthase subunit beta OS=Leptolyngbya sp. OX=47254 GN=atpD PE=3 SV=1	47254	NA	3	7	5	3	NA	A0A2W6ZT46		Leptolyngbya sp.				annotated	Species	Bacteria; Cyanobacteria; Synechococcales; Leptolyngbyaceae; Leptolyngbya	2650499
52	351	tr|A0A2W7AHJ1|A0A2W7AHJ1_9CYAN	6	426	S-layer protein OS=Leptolyngbya sp. OX=47254 GN=DCF22_07865 PE=3 SV=1	47254	NA	2	NA	2	NA	NA	A0A2W7AHJ1		Leptolyngbya sp.				annotated	Species	Bacteria; Cyanobacteria; Synechococcales; Leptolyngbyaceae; Leptolyngbya	2650499
60	352	tr|A0A2W7AIS6|A0A2W7AIS6_9CYAN	5	479	S-layer homology domain-containing protein OS=Leptolyngbya sp. OX=47254 GN=DCF22_08990 PE=4 SV=1	47254	12	9	19	17	8	NA	A0A2W7AIS6		Leptolyngbya sp.				annotated	Species	Bacteria; Cyanobacteria; Synechococcales; Leptolyngbyaceae; Leptolyngbya	2650499
65	361	tr|A0A2W7B830|A0A2W7B830_9CYAN	8	513	10 kDa chaperonin OS=Leptolyngbya sp. OX=47254 GN=groS PE=3 SV=1	47254	NA	NA	NA	2	2	3	A0A2W7B830		Leptolyngbya sp.				annotated	Species	Bacteria; Cyanobacteria; Synechococcales; Leptolyngbyaceae; Leptolyngbya	2650499
74	360	tr|A0A2W7B737|A0A2W7B737_9CYAN	5	571	Polyribonucleotide nucleotidyltransferase OS=Leptolyngbya sp. OX=47254 GN=pnp PE=3 SV=1	47254	6	16	2	NA	NA	NA	A0A2W7B737		Leptolyngbya sp.				annotated	Species	Bacteria; Cyanobacteria; Synechococcales; Leptolyngbyaceae; Leptolyngbya	2650499
83	33	tr|A0A0P4UTS2|A0A0P4UTS2_9CYAN	5	659	Uncharacterized protein OS=Leptolyngbya sp. NIES-2104 OX=1552121 GN=NIES2104_52680 PE=4 SV=1	1552121	9	13	15	5	6	NA	A0A0P4UTS2		Leptolyngbya sp. NIES-2104				annotated	Species	Bacteria; Cyanobacteria; Synechococcales; Leptolyngbyaceae; Leptolyngbya	2650499
86	34	tr|A0A0P4UUI5|A0A0P4UUI5_9CYAN	9	667	Urea ABC transporter substrate binding protein UrtA OS=Leptolyngbya sp. NIES-2104 OX=1552121 GN=NIES2104_47500 PE=4 SV=1	1552121	4	15	13	2	3	NA	A0A0P4UUI5		Leptolyngbya sp. NIES-2104				annotated	Species	Bacteria; Cyanobacteria; Synechococcales; Leptolyngbyaceae; Leptolyngbya	2650499
91	353	tr|A0A2W7ALH8|A0A2W7ALH8_9CYAN	7	692	30S ribosomal protein S1 OS=Leptolyngbya sp. OX=47254 GN=DCF22_09250 PE=4 SV=1	47254	NA	3	3	3	2	NA	A0A2W7ALH8		Leptolyngbya sp.				annotated	Species	Bacteria; Cyanobacteria; Synechococcales; Leptolyngbyaceae; Leptolyngbya	2650499
94	357	tr|A0A2W7AZ37|A0A2W7AZ37_9CYAN	6	712	60 kDa chaperonin OS=Leptolyngbya sp. OX=47254 GN=groL PE=3 SV=1	47254	NA	7	4	2	2	NA	A0A2W7AZ37		Leptolyngbya sp.				annotated	Species	Bacteria; Cyanobacteria; Synechococcales; Leptolyngbyaceae; Leptolyngbya	2650499
108	46	tr|A0A0S3UE72|A0A0S3UE72_9CYAN	4	828	ABC transporter solute-binding protein OS=Leptolyngbya sp. NIES-3755 OX=1752064 GN=LEP3755_63070 PE=3 SV=1	1752064	11	10	11	6	NA	NA	A0A0S3UE72		Leptolyngbya sp. NIES-3755				annotated	Species	Bacteria; Cyanobacteria; Synechococcales; Leptolyngbyaceae; Leptolyngbya	2650499
112	350	tr|A0A2W7AHE0|A0A2W7AHE0_9CYAN	6	874	Elongation factor Tu OS=Leptolyngbya sp. OX=47254 GN=tuf PE=3 SV=1	47254	NA	6	3	2	NA	NA	A0A2W7AHE0		Leptolyngbya sp.				annotated	Species	Bacteria; Cyanobacteria; Synechococcales; Leptolyngbyaceae; Leptolyngbya	2650499
115	407	tr|A0A3M9ZAE5|A0A3M9ZAE5_9CYAN	7	882	Fructose-1 6-bisphosphate aldolase OS=Leptolyngbya sp. IPPAS B-1204 OX=2483801 GN=fba PE=3 SV=1	2483801	3	8	7	3	5	NA	A0A3M9ZAE5		Leptolyngbya sp. IPPAS B-1204				annotated	Species	Bacteria; Cyanobacteria; Synechococcales; Leptolyngbyaceae; Leptolyngbya	2650499
125	349	tr|A0A2W7A1A5|A0A2W7A1A5_9CYAN	6	1006	Chaperone protein DnaK OS=Leptolyngbya sp. OX=47254 GN=dnaK PE=2 SV=1	47254	4	NA	4	7	2	NA	A0A2W7A1A5		Leptolyngbya sp.				annotated	Species	Bacteria; Cyanobacteria; Synechococcales; Leptolyngbyaceae; Leptolyngbya	2650499
135	356	tr|A0A2W7AT93|A0A2W7AT93_9CYAN	4	1085	DNA-directed RNA polymerase subunit beta' OS=Leptolyngbya sp. OX=47254 GN=rpoC2 PE=3 SV=1	47254	NA	7	2	NA	NA	NA	A0A2W7AT93		Leptolyngbya sp.				annotated	Species	Bacteria; Cyanobacteria; Synechococcales; Leptolyngbyaceae; Leptolyngbya	2650499
146	359	tr|A0A2W7B6P4|A0A2W7B6P4_9CYAN	4	1177	ATP synthase subunit alpha OS=Leptolyngbya sp. OX=47254 GN=atpA PE=3 SV=1	47254	NA	2	NA	NA	2	NA	A0A2W7B6P4		Leptolyngbya sp.				annotated	Species	Bacteria; Cyanobacteria; Synechococcales; Leptolyngbyaceae; Leptolyngbya	2650499
159	121	tr|A0A1Z4JAD5|A0A1Z4JAD5_LEPBY	5	1279	LuxR family transcriptional regulator OS=Leptolyngbya boryana NIES-2135 OX=1973484 GN=NIES2135_02020 PE=4 SV=1	1973484	3	4	3	NA	NA	NA	A0A1Z4JAD5		Leptolyngbya boryana NIES-2135				annotated		Bacteria; Cyanobacteria; Synechococcales; Leptolyngbyaceae; Leptolyngbya	1184
166	125	tr|A0A1Z4JKR1|A0A1Z4JKR1_LEPBY	5	1330	Rhodanese domain-containing protein OS=Leptolyngbya boryana NIES-2135 OX=1973484 GN=NIES2135_41890 PE=4 SV=1	1973484	3	NA	3	3	NA	NA	A0A1Z4JKR1		Leptolyngbya boryana NIES-2135				annotated		Bacteria; Cyanobacteria; Synechococcales; Leptolyngbyaceae; Leptolyngbya	1184
181	364	tr|A0A2W7BHQ9|A0A2W7BHQ9_9CYAN	3	1447	DNA-directed RNA polymerase subunit beta OS=Leptolyngbya sp. OX=47254 GN=rpoB PE=3 SV=1	47254	NA	5	NA	NA	NA	NA	A0A2W7BHQ9		Leptolyngbya sp.				annotated	Species	Bacteria; Cyanobacteria; Synechococcales; Leptolyngbyaceae; Leptolyngbya	2650499
188	363	tr|A0A2W7BFY6|A0A2W7BFY6_9CYAN	4	1512	Phycobiliprotein ApcE OS=Leptolyngbya sp. OX=47254 GN=DCF22_03035 PE=3 SV=1	47254	NA	6	4	NA	NA	NA	A0A2W7BFY6		Leptolyngbya sp.				annotated	Species	Bacteria; Cyanobacteria; Synechococcales; Leptolyngbyaceae; Leptolyngbya	2650499
198	362	tr|A0A2W7BB34|A0A2W7BB34_9CYAN	5	1612	Peroxiredoxin OS=Leptolyngbya sp. OX=47254 GN=DCF22_05850 PE=3 SV=1	47254	2	2	NA	NA	2	NA	A0A2W7BB34		Leptolyngbya sp.				annotated	Species	Bacteria; Cyanobacteria; Synechococcales; Leptolyngbyaceae; Leptolyngbya	2650499
240	527	tr|A0A651DZH8|A0A651DZH8_9CYAN	4	1889	Red carotenoid-binding protein OS=Leptolyngbya sp. DLM2.Bin15 OX=2480212 GN=EA367_19480 PE=4 SV=1	2480212	NA	2	NA	NA	NA	NA	A0A651DZH8		Leptolyngbya sp. DLM2.Bin15				annotated	Species	Bacteria; Cyanobacteria; Synechococcales; Leptolyngbyaceae; Leptolyngbya	2650499
253	358	tr|A0A2W7B0C8|A0A2W7B0C8_9CYAN	3	1967	Urea ABC transporter substrate-binding protein OS=Leptolyngbya sp. OX=47254 GN=urtA PE=4 SV=1	47254	NA	5	NA	NA	NA	NA	A0A2W7B0C8		Leptolyngbya sp.				annotated	Species	Bacteria; Cyanobacteria; Synechococcales; Leptolyngbyaceae; Leptolyngbya	2650499
262	53	tr|A0A0X8WUT4|A0A0X8WUT4_9CYAN	3	2018	Uncharacterized protein OS=Leptolyngbya sp. O-77 OX=1080068 GN=O77CONTIG1_02689 PE=4 SV=1	1080068	NA	5	4	NA	NA	NA	A0A0X8WUT4		Leptolyngbya sp. O-77				annotated	Species	Bacteria; Cyanobacteria; Synechococcales; Leptolyngbyaceae; Leptolyngbya	2650499
303	30	tr|A0A0N7Z3N3|A0A0N7Z3N3_9CYAN	2	2432	Polyketide_cyc domain-containing protein OS=Leptolyngbya sp. NIES-2104 OX=1552121 GN=NIES2104_02930 PE=4 SV=1	1552121	NA	NA	4	NA	NA	NA	A0A0N7Z3N3		Leptolyngbya sp. NIES-2104				annotated	Species	Bacteria; Cyanobacteria; Synechococcales; Leptolyngbyaceae; Leptolyngbya	2650499
332	52	tr|A0A0X8WU20|A0A0X8WU20_9CYAN	2	2670	30S ribosomal protein S8 OS=Leptolyngbya sp. O-77 OX=1080068 GN=rpsH PE=3 SV=1	1080068	2	2	NA	NA	NA	NA	A0A0X8WU20		Leptolyngbya sp. O-77				annotated	Species	Bacteria; Cyanobacteria; Synechococcales; Leptolyngbyaceae; Leptolyngbya	2650499
351	107	tr|A0A1Q8Z7N5|A0A1Q8Z7N5_9CYAN	2	2868	DNA-directed RNA polymerase subunit alpha OS=Leptolyngbya sp. 'hensonii' OX=1922337 GN=rpoA PE=3 SV=1	1922337	NA	2	NA	NA	NA	NA	A0A1Q8Z7N5		Leptolyngbya sp. 'hensonii'			Oscillatoriales cyanobacterium 'hensonii'	annotated	Species	Bacteria; Cyanobacteria; Synechococcales; Leptolyngbyaceae; Leptolyngbya	2650499
356	108	tr|A0A1Q8Z933|A0A1Q8Z933_9CYAN	2	2928	Chaperone protein DnaK OS=Leptolyngbya sp. 'hensonii' OX=1922337 GN=dnaK PE=2 SV=1	1922337	NA	NA	NA	NA	2	NA	A0A1Q8Z933		Leptolyngbya sp. 'hensonii'			Oscillatoriales cyanobacterium 'hensonii'	annotated	Species	Bacteria; Cyanobacteria; Synechococcales; Leptolyngbyaceae; Leptolyngbya	2650499
1	276	tr|A0A2T1DKV5|A0A2T1DKV5_9CYAN	10	3	Phycocyanin subunit alpha OS=Phormidesmis priestleyi ULC007 OX=1920490 GN=cpcA PE=3 SV=1	1920490	39	52	109	63	43	12	A0A2T1DKV5		Phormidesmis priestleyi ULC007				annotated		Bacteria; Cyanobacteria; Synechococcales; Leptolyngbyaceae; Phormidesmis	268141
3	253	tr|A0A2T1DGA4|A0A2T1DGA4_9CYAN	10	5	60 kDa chaperonin OS=Phormidesmis priestleyi ULC007 OX=1920490 GN=groL PE=3 SV=1	1920490	41	63	54	21	31	NA	A0A2T1DGA4		Phormidesmis priestleyi ULC007				annotated		Bacteria; Cyanobacteria; Synechococcales; Leptolyngbyaceae; Phormidesmis	268141
4	254	tr|A0A2T1DGA8|A0A2T1DGA8_9CYAN	11	6	Fasciclin domain-containing protein OS=Phormidesmis priestleyi ULC007 OX=1920490 GN=C7B65_11485 PE=4 SV=1	1920490	66	68	72	45	36	19	A0A2T1DGA8		Phormidesmis priestleyi ULC007				annotated		Bacteria; Cyanobacteria; Synechococcales; Leptolyngbyaceae; Phormidesmis	268141
5	244	tr|A0A2T1DFX5|A0A2T1DFX5_9CYAN	11	16	SLH domain-containing protein OS=Phormidesmis priestleyi ULC007 OX=1920490 GN=C7B65_10825 PE=3 SV=1	1920490	75	89	83	22	55	7	A0A2T1DFX5		Phormidesmis priestleyi ULC007				annotated		Bacteria; Cyanobacteria; Synechococcales; Leptolyngbyaceae; Phormidesmis	268141
6	277	tr|A0A2T1DKV9|A0A2T1DKV9_9CYAN	11	18	Phycocyanin subunit beta OS=Phormidesmis priestleyi ULC007 OX=1920490 GN=C7B65_04085 PE=3 SV=1	1920490	31	52	71	42	38	11	A0A2T1DKV9		Phormidesmis priestleyi ULC007				annotated		Bacteria; Cyanobacteria; Synechococcales; Leptolyngbyaceae; Phormidesmis	268141
7	226	tr|A0A2T1DD05|A0A2T1DD05_9CYAN	9	42	S-layer protein OS=Phormidesmis priestleyi ULC007 OX=1920490 GN=C7B65_15860 PE=3 SV=1	1920490	54	85	91	11	24	NA	A0A2T1DD05		Phormidesmis priestleyi ULC007				annotated		Bacteria; Cyanobacteria; Synechococcales; Leptolyngbyaceae; Phormidesmis	268141
9	252	tr|A0A2T1DG79|A0A2T1DG79_9CYAN	9	51	10 kDa chaperonin OS=Phormidesmis priestleyi ULC007 OX=1920490 GN=groS PE=3 SV=1	1920490	48	54	60	57	28	NA	A0A2T1DG79		Phormidesmis priestleyi ULC007				annotated		Bacteria; Cyanobacteria; Synechococcales; Leptolyngbyaceae; Phormidesmis	268141
10	285	tr|A0A2T1DLH9|A0A2T1DLH9_9CYAN	5	82	Phosphate-binding protein OS=Phormidesmis priestleyi ULC007 OX=1920490 GN=pstS PE=3 SV=1	1920490	53	46	67	39	26	NA	A0A2T1DLH9		Phormidesmis priestleyi ULC007				annotated		Bacteria; Cyanobacteria; Synechococcales; Leptolyngbyaceae; Phormidesmis	268141
12	281	tr|A0A2T1DL13|A0A2T1DL13_9CYAN	10	116	SLH domain-containing protein OS=Phormidesmis priestleyi ULC007 OX=1920490 GN=C7B65_04375 PE=3 SV=1	1920490	33	44	48	21	24	3	A0A2T1DL13		Phormidesmis priestleyi ULC007				annotated		Bacteria; Cyanobacteria; Synechococcales; Leptolyngbyaceae; Phormidesmis	268141
14	306	tr|A0A2T1DNN0|A0A2T1DNN0_9CYAN	10	122	ATP synthase subunit beta OS=Phormidesmis priestleyi ULC007 OX=1920490 GN=atpD PE=3 SV=1	1920490	13	15	29	13	11	NA	A0A2T1DNN0		Phormidesmis priestleyi ULC007				annotated		Bacteria; Cyanobacteria; Synechococcales; Leptolyngbyaceae; Phormidesmis	268141
15	268	tr|A0A2T1DJD4|A0A2T1DJD4_9CYAN	10	134	60 kDa chaperonin OS=Phormidesmis priestleyi ULC007 OX=1920490 GN=groL PE=3 SV=1	1920490	23	35	40	12	20	NA	A0A2T1DJD4		Phormidesmis priestleyi ULC007				annotated		Bacteria; Cyanobacteria; Synechococcales; Leptolyngbyaceae; Phormidesmis	268141
17	297	tr|A0A2T1DM89|A0A2T1DM89_9CYAN	10	179	SLH domain-containing protein OS=Phormidesmis priestleyi ULC007 OX=1920490 GN=C7B65_02800 PE=3 SV=1	1920490	14	26	21	13	13	NA	A0A2T1DM89		Phormidesmis priestleyi ULC007				annotated		Bacteria; Cyanobacteria; Synechococcales; Leptolyngbyaceae; Phormidesmis	268141
18	189	tr|A0A2T1D4W7|A0A2T1D4W7_9CYAN	5	180	Alkaline phosphatase OS=Phormidesmis priestleyi ULC007 OX=1920490 GN=C7B65_24155 PE=4 SV=1	1920490	37	24	57	28	10	NA	A0A2T1D4W7		Phormidesmis priestleyi ULC007				annotated		Bacteria; Cyanobacteria; Synechococcales; Leptolyngbyaceae; Phormidesmis	268141
22	220	tr|A0A2T1DCE2|A0A2T1DCE2_9CYAN	9	249	Porin OS=Phormidesmis priestleyi ULC007 OX=1920490 GN=C7B65_16480 PE=3 SV=1	1920490	16	23	30	15	18	NA	A0A2T1DCE2		Phormidesmis priestleyi ULC007				annotated		Bacteria; Cyanobacteria; Synechococcales; Leptolyngbyaceae; Phormidesmis	268141
23	205	tr|A0A2T1D8J6|A0A2T1D8J6_9CYAN	7	262	AMIN domain-containing protein OS=Phormidesmis priestleyi ULC007 OX=1920490 GN=C7B65_20405 PE=3 SV=1	1920490	26	16	43	12	20	NA	A0A2T1D8J6		Phormidesmis priestleyi ULC007				annotated		Bacteria; Cyanobacteria; Synechococcales; Leptolyngbyaceae; Phormidesmis	268141
27	201	tr|A0A2T1D797|A0A2T1D797_9CYAN	9	284	Chaperone protein DnaK OS=Phormidesmis priestleyi ULC007 OX=1920490 GN=dnaK PE=2 SV=1	1920490	25	29	20	18	5	NA	A0A2T1D797		Phormidesmis priestleyi ULC007				annotated		Bacteria; Cyanobacteria; Synechococcales; Leptolyngbyaceae; Phormidesmis	268141
32	227	tr|A0A2T1DD61|A0A2T1DD61_9CYAN	7	318	Uncharacterized protein OS=Phormidesmis priestleyi ULC007 OX=1920490 GN=C7B65_15320 PE=4 SV=1	1920490	23	25	25	16	11	NA	A0A2T1DD61		Phormidesmis priestleyi ULC007				annotated		Bacteria; Cyanobacteria; Synechococcales; Leptolyngbyaceae; Phormidesmis	268141
34	301	tr|A0A2T1DMN4|A0A2T1DMN4_9CYAN	8	335	ATP synthase subunit alpha OS=Phormidesmis priestleyi ULC007 OX=1920490 GN=atpA PE=3 SV=1	1920490	12	12	16	17	13	NA	A0A2T1DMN4		Phormidesmis priestleyi ULC007				annotated		Bacteria; Cyanobacteria; Synechococcales; Leptolyngbyaceae; Phormidesmis	268141
35	185	tr|A0A2T1D2X3|A0A2T1D2X3_9CYAN	8	340	RNA-binding protein OS=Phormidesmis priestleyi ULC007 OX=1920490 GN=C7B65_25800 PE=4 SV=1	1920490	21	14	23	12	9	NA	A0A2T1D2X3		Phormidesmis priestleyi ULC007				annotated		Bacteria; Cyanobacteria; Synechococcales; Leptolyngbyaceae; Phormidesmis	268141
37	217	tr|A0A2T1DBW2|A0A2T1DBW2_9CYAN	7	347	DUF4331 domain-containing protein OS=Phormidesmis priestleyi ULC007 OX=1920490 GN=C7B65_17070 PE=4 SV=1	1920490	28	21	21	6	8	NA	A0A2T1DBW2		Phormidesmis priestleyi ULC007				annotated		Bacteria; Cyanobacteria; Synechococcales; Leptolyngbyaceae; Phormidesmis	268141
39	187	tr|A0A2T1D3W8|A0A2T1D3W8_9CYAN	5	352	Phosphodiesterase OS=Phormidesmis priestleyi ULC007 OX=1920490 GN=C7B65_25075 PE=4 SV=1	1920490	28	18	29	12	5	NA	A0A2T1D3W8		Phormidesmis priestleyi ULC007				annotated		Bacteria; Cyanobacteria; Synechococcales; Leptolyngbyaceae; Phormidesmis	268141
43	236	tr|A0A2T1DFB1|A0A2T1DFB1_9CYAN	5	380	Fasciclin domain-containing protein OS=Phormidesmis priestleyi ULC007 OX=1920490 GN=C7B65_12740 PE=4 SV=1	1920490	24	16	26	13	6	NA	A0A2T1DFB1		Phormidesmis priestleyi ULC007				annotated		Bacteria; Cyanobacteria; Synechococcales; Leptolyngbyaceae; Phormidesmis	268141
49	272	tr|A0A2T1DKF9|A0A2T1DKF9_9CYAN	7	408	Polyribonucleotide nucleotidyltransferase OS=Phormidesmis priestleyi ULC007 OX=1920490 GN=pnp PE=3 SV=1	1920490	13	26	8	6	4	NA	A0A2T1DKF9		Phormidesmis priestleyi ULC007				annotated		Bacteria; Cyanobacteria; Synechococcales; Leptolyngbyaceae; Phormidesmis	268141
50	286	tr|A0A2T1DLU9|A0A2T1DLU9_9CYAN	8	410	Photosystem I 16 kDa polypeptide OS=Phormidesmis priestleyi ULC007 OX=1920490 GN=C7B65_02270 PE=3 SV=1	1920490	13	5	24	4	8	NA	A0A2T1DLU9		Phormidesmis priestleyi ULC007				annotated		Bacteria; Cyanobacteria; Synechococcales; Leptolyngbyaceae; Phormidesmis	268141
55	246	tr|A0A2T1DFZ9|A0A2T1DFZ9_9CYAN	5	438	Insulinase family protein OS=Phormidesmis priestleyi ULC007 OX=1920490 GN=C7B65_10900 PE=4 SV=1	1920490	17	13	22	12	7	NA	A0A2T1DFZ9		Phormidesmis priestleyi ULC007				annotated		Bacteria; Cyanobacteria; Synechococcales; Leptolyngbyaceae; Phormidesmis	268141
56	190	tr|A0A2T1D5P1|A0A2T1D5P1_9CYAN	6	445	HU family DNA-binding protein OS=Phormidesmis priestleyi ULC007 OX=1920490 GN=C7B65_23695 PE=3 SV=1	1920490	10	15	20	10	12	NA	A0A2T1D5P1		Phormidesmis priestleyi ULC007				annotated		Bacteria; Cyanobacteria; Synechococcales; Leptolyngbyaceae; Phormidesmis	268141
57	196	tr|A0A2T1D6C1|A0A2T1D6C1_9CYAN	5	446	UPF0367 protein C7B65_22880 OS=Phormidesmis priestleyi ULC007 OX=1920490 GN=C7B65_22880 PE=3 SV=1	1920490	23	9	20	9	9	NA	A0A2T1D6C1		Phormidesmis priestleyi ULC007				annotated		Bacteria; Cyanobacteria; Synechococcales; Leptolyngbyaceae; Phormidesmis	268141
59	256	tr|A0A2T1DGP8|A0A2T1DGP8_9CYAN	7	462	RNA-binding protein OS=Phormidesmis priestleyi ULC007 OX=1920490 GN=C7B65_10195 PE=4 SV=1	1920490	13	13	16	8	3	NA	A0A2T1DGP8		Phormidesmis priestleyi ULC007				annotated		Bacteria; Cyanobacteria; Synechococcales; Leptolyngbyaceae; Phormidesmis	268141
66	270	tr|A0A2T1DJS0|A0A2T1DJS0_9CYAN	7	517	Uncharacterized protein OS=Phormidesmis priestleyi ULC007 OX=1920490 GN=C7B65_06645 PE=4 SV=1	1920490	7	15	12	7	5	NA	A0A2T1DJS0		Phormidesmis priestleyi ULC007				annotated		Bacteria; Cyanobacteria; Synechococcales; Leptolyngbyaceae; Phormidesmis	268141
78	267	tr|A0A2T1DIU0|A0A2T1DIU0_9CYAN	5	595	Uncharacterized protein OS=Phormidesmis priestleyi ULC007 OX=1920490 GN=C7B65_07875 PE=4 SV=1	1920490	17	7	15	10	4	NA	A0A2T1DIU0		Phormidesmis priestleyi ULC007				annotated		Bacteria; Cyanobacteria; Synechococcales; Leptolyngbyaceae; Phormidesmis	268141
80	212	tr|A0A2T1DAM9|A0A2T1DAM9_9CYAN	9	634	Urea ABC transporter substrate-binding protein OS=Phormidesmis priestleyi ULC007 OX=1920490 GN=urtA PE=4 SV=1	1920490	2	13	10	2	4	NA	A0A2T1DAM9		Phormidesmis priestleyi ULC007				annotated		Bacteria; Cyanobacteria; Synechococcales; Leptolyngbyaceae; Phormidesmis	268141
82	211	tr|A0A2T1DA47|A0A2T1DA47_9CYAN	5	651	ATP-dependent Clp protease proteolytic subunit OS=Phormidesmis priestleyi ULC007 OX=1920490 GN=clpP PE=3 SV=1	1920490	3	14	17	NA	5	NA	A0A2T1DA47		Phormidesmis priestleyi ULC007				annotated		Bacteria; Cyanobacteria; Synechococcales; Leptolyngbyaceae; Phormidesmis	268141
87	195	tr|A0A2T1D6A6|A0A2T1D6A6_9CYAN	7	674	Phycobiliprotein ApcE OS=Phormidesmis priestleyi ULC007 OX=1920490 GN=C7B65_22910 PE=3 SV=1	1920490	8	10	11	6	2	NA	A0A2T1D6A6		Phormidesmis priestleyi ULC007				annotated		Bacteria; Cyanobacteria; Synechococcales; Leptolyngbyaceae; Phormidesmis	268141
89	228	tr|A0A2T1DDD3|A0A2T1DDD3_9CYAN	7	678	Superoxide dismutase OS=Phormidesmis priestleyi ULC007 OX=1920490 GN=C7B65_15395 PE=3 SV=1	1920490	3	19	11	4	5	NA	A0A2T1DDD3		Phormidesmis priestleyi ULC007				annotated		Bacteria; Cyanobacteria; Synechococcales; Leptolyngbyaceae; Phormidesmis	268141
90	225	tr|A0A2T1DCX7|A0A2T1DCX7_9CYAN	5	680	TolC family protein OS=Phormidesmis priestleyi ULC007 OX=1920490 GN=C7B65_15565 PE=3 SV=1	1920490	12	5	19	5	6	NA	A0A2T1DCX7		Phormidesmis priestleyi ULC007				annotated		Bacteria; Cyanobacteria; Synechococcales; Leptolyngbyaceae; Phormidesmis	268141
93	219	tr|A0A2T1DC92|A0A2T1DC92_9CYAN	7	706	Cytochrome c-550 OS=Phormidesmis priestleyi ULC007 OX=1920490 GN=psbV PE=3 SV=1	1920490	15	6	12	6	3	NA	A0A2T1DC92		Phormidesmis priestleyi ULC007				annotated		Bacteria; Cyanobacteria; Synechococcales; Leptolyngbyaceae; Phormidesmis	268141
97	239	tr|A0A2T1DFJ5|A0A2T1DFJ5_9CYAN	5	733	CsbD family protein OS=Phormidesmis priestleyi ULC007 OX=1920490 GN=C7B65_11635 PE=3 SV=1	1920490	9	4	11	16	4	NA	A0A2T1DFJ5		Phormidesmis priestleyi ULC007				annotated		Bacteria; Cyanobacteria; Synechococcales; Leptolyngbyaceae; Phormidesmis	268141
99	259	tr|A0A2T1DHC9|A0A2T1DHC9_9CYAN	7	751	Nucleoside diphosphate kinase OS=Phormidesmis priestleyi ULC007 OX=1920490 GN=ndk PE=3 SV=1	1920490	5	13	8	3	7	NA	A0A2T1DHC9		Phormidesmis priestleyi ULC007				annotated		Bacteria; Cyanobacteria; Synechococcales; Leptolyngbyaceae; Phormidesmis	268141
100	289	tr|A0A2T1DLX1|A0A2T1DLX1_9CYAN	7	757	30S ribosomal protein S5 OS=Phormidesmis priestleyi ULC007 OX=1920490 GN=rpsE PE=3 SV=1	1920490	9	6	12	4	2	NA	A0A2T1DLX1		Phormidesmis priestleyi ULC007				annotated		Bacteria; Cyanobacteria; Synechococcales; Leptolyngbyaceae; Phormidesmis	268141
101	287	tr|A0A2T1DLV5|A0A2T1DLV5_9CYAN	6	766	50S ribosomal protein L5 OS=Phormidesmis priestleyi ULC007 OX=1920490 GN=rplE PE=3 SV=1	1920490	9	11	14	3	2	NA	A0A2T1DLV5		Phormidesmis priestleyi ULC007				annotated		Bacteria; Cyanobacteria; Synechococcales; Leptolyngbyaceae; Phormidesmis	268141
102	248	tr|A0A2T1DG34|A0A2T1DG34_9CYAN	8	780	ATP-dependent zinc metalloprotease FtsH OS=Phormidesmis priestleyi ULC007 OX=1920490 GN=ftsH PE=3 SV=1	1920490	5	12	5	NA	NA	NA	A0A2T1DG34		Phormidesmis priestleyi ULC007				annotated		Bacteria; Cyanobacteria; Synechococcales; Leptolyngbyaceae; Phormidesmis	268141
103	200	tr|A0A2T1D784|A0A2T1D784_9CYAN	5	784	Bicarbonate-binding protein OS=Phormidesmis priestleyi ULC007 OX=1920490 GN=C7B65_21905 PE=3 SV=1	1920490	4	4	4	NA	NA	NA	A0A2T1D784		Phormidesmis priestleyi ULC007				annotated		Bacteria; Cyanobacteria; Synechococcales; Leptolyngbyaceae; Phormidesmis	268141
104	257	tr|A0A2T1DGR2|A0A2T1DGR2_9CYAN	5	790	High light inducible protein OS=Phormidesmis priestleyi ULC007 OX=1920490 GN=C7B65_10235 PE=4 SV=1	1920490	4	16	16	2	3	NA	A0A2T1DGR2		Phormidesmis priestleyi ULC007				annotated		Bacteria; Cyanobacteria; Synechococcales; Leptolyngbyaceae; Phormidesmis	268141
106	218	tr|A0A2T1DC81|A0A2T1DC81_9CYAN	4	809	Rhodanese-like domain-containing protein OS=Phormidesmis priestleyi ULC007 OX=1920490 GN=C7B65_16460 PE=4 SV=1	1920490	9	6	15	9	NA	NA	A0A2T1DC81		Phormidesmis priestleyi ULC007				annotated		Bacteria; Cyanobacteria; Synechococcales; Leptolyngbyaceae; Phormidesmis	268141
107	208	tr|A0A2T1D977|A0A2T1D977_9CYAN	3	822	Uncharacterized protein OS=Phormidesmis priestleyi ULC007 OX=1920490 GN=C7B65_19820 PE=4 SV=1	1920490	11	9	17	NA	NA	NA	A0A2T1D977		Phormidesmis priestleyi ULC007				annotated		Bacteria; Cyanobacteria; Synechococcales; Leptolyngbyaceae; Phormidesmis	268141
111	258	tr|A0A2T1DGZ9|A0A2T1DGZ9_9CYAN	5	843	Glyceraldehyde-3-phosphate dehydrogenase OS=Phormidesmis priestleyi ULC007 OX=1920490 GN=gap PE=3 SV=1	1920490	NA	14	4	NA	3	NA	A0A2T1DGZ9		Phormidesmis priestleyi ULC007				annotated		Bacteria; Cyanobacteria; Synechococcales; Leptolyngbyaceae; Phormidesmis	268141
113	261	tr|A0A2T1DHK3|A0A2T1DHK3_9CYAN	7	879	Red carotenoid-binding protein OS=Phormidesmis priestleyi ULC007 OX=1920490 GN=C7B65_09880 PE=3 SV=1	1920490	4	10	2	NA	NA	NA	A0A2T1DHK3		Phormidesmis priestleyi ULC007				annotated		Bacteria; Cyanobacteria; Synechococcales; Leptolyngbyaceae; Phormidesmis	268141
118	307	tr|A0A2T1DP56|A0A2T1DP56_9CYAN	6	903	30S ribosomal protein S7 OS=Phormidesmis priestleyi ULC007 OX=1920490 GN=rpsG PE=3 SV=1	1920490	4	6	10	2	NA	NA	A0A2T1DP56		Phormidesmis priestleyi ULC007				annotated		Bacteria; Cyanobacteria; Synechococcales; Leptolyngbyaceae; Phormidesmis	268141
119	206	tr|A0A2T1D8Q9|A0A2T1D8Q9_9CYAN	5	919	DUF1565 domain-containing protein OS=Phormidesmis priestleyi ULC007 OX=1920490 GN=C7B65_20390 PE=4 SV=1	1920490	9	4	13	7	2	NA	A0A2T1D8Q9		Phormidesmis priestleyi ULC007				annotated		Bacteria; Cyanobacteria; Synechococcales; Leptolyngbyaceae; Phormidesmis	268141
123	203	tr|A0A2T1D7J4|A0A2T1D7J4_9CYAN	4	994	Peptidyl-prolyl cis-trans isomerase OS=Phormidesmis priestleyi ULC007 OX=1920490 GN=C7B65_21625 PE=3 SV=1	1920490	7	12	8	5	NA	NA	A0A2T1D7J4		Phormidesmis priestleyi ULC007				annotated		Bacteria; Cyanobacteria; Synechococcales; Leptolyngbyaceae; Phormidesmis	268141
124	243	tr|A0A2T1DFV2|A0A2T1DFV2_9CYAN	7	997	DNA starvation/stationary phase protection protein OS=Phormidesmis priestleyi ULC007 OX=1920490 GN=C7B65_12295 PE=3 SV=1	1920490	6	10	5	2	3	NA	A0A2T1DFV2		Phormidesmis priestleyi ULC007				annotated		Bacteria; Cyanobacteria; Synechococcales; Leptolyngbyaceae; Phormidesmis	268141
126	188	tr|A0A2T1D3X4|A0A2T1D3X4_9CYAN	4	1019	HU family DNA-binding protein OS=Phormidesmis priestleyi ULC007 OX=1920490 GN=C7B65_24965 PE=3 SV=1	1920490	6	7	14	NA	3	NA	A0A2T1D3X4		Phormidesmis priestleyi ULC007				annotated		Bacteria; Cyanobacteria; Synechococcales; Leptolyngbyaceae; Phormidesmis	268141
129	249	tr|A0A2T1DG40|A0A2T1DG40_9CYAN	6	1034	Uncharacterized protein OS=Phormidesmis priestleyi ULC007 OX=1920490 GN=C7B65_10845 PE=4 SV=1	1920490	3	9	6	2	5	NA	A0A2T1DG40		Phormidesmis priestleyi ULC007				annotated		Bacteria; Cyanobacteria; Synechococcales; Leptolyngbyaceae; Phormidesmis	268141
132	194	tr|A0A2T1D646|A0A2T1D646_9CYAN	6	1054	Photosystem II CP43 reaction center protein OS=Phormidesmis priestleyi ULC007 OX=1920490 GN=psbC PE=3 SV=1	1920490	NA	7	3	2	2	NA	A0A2T1D646		Phormidesmis priestleyi ULC007				annotated		Bacteria; Cyanobacteria; Synechococcales; Leptolyngbyaceae; Phormidesmis	268141
136	295	tr|A0A2T1DLZ6|A0A2T1DLZ6_9CYAN	4	1090	50S ribosomal protein L6 OS=Phormidesmis priestleyi ULC007 OX=1920490 GN=rplF PE=3 SV=1	1920490	7	9	10	2	NA	NA	A0A2T1DLZ6		Phormidesmis priestleyi ULC007				annotated		Bacteria; Cyanobacteria; Synechococcales; Leptolyngbyaceae; Phormidesmis	268141
137	231	tr|A0A2T1DEF8|A0A2T1DEF8_9CYAN	5	1099	Histidine kinase OS=Phormidesmis priestleyi ULC007 OX=1920490 GN=C7B65_13930 PE=4 SV=1	1920490	7	6	5	3	7	NA	A0A2T1DEF8		Phormidesmis priestleyi ULC007				annotated		Bacteria; Cyanobacteria; Synechococcales; Leptolyngbyaceae; Phormidesmis	268141
139	302	tr|A0A2T1DN44|A0A2T1DN44_9CYAN	4	1104	PDZ domain-containing protein OS=Phormidesmis priestleyi ULC007 OX=1920490 GN=C7B65_00145 PE=3 SV=1	1920490	11	NA	7	9	2	NA	A0A2T1DN44		Phormidesmis priestleyi ULC007				annotated		Bacteria; Cyanobacteria; Synechococcales; Leptolyngbyaceae; Phormidesmis	268141
145	222	tr|A0A2T1DCQ2|A0A2T1DCQ2_9CYAN	4	1174	DUF1565 domain-containing protein OS=Phormidesmis priestleyi ULC007 OX=1920490 GN=C7B65_16270 PE=4 SV=1	1920490	5	7	11	NA	3	NA	A0A2T1DCQ2		Phormidesmis priestleyi ULC007				annotated		Bacteria; Cyanobacteria; Synechococcales; Leptolyngbyaceae; Phormidesmis	268141
147	291	tr|A0A2T1DLY1|A0A2T1DLY1_9CYAN	2	1179	30S ribosomal protein S3 OS=Phormidesmis priestleyi ULC007 OX=1920490 GN=rpsC PE=3 SV=1	1920490	NA	21	NA	NA	4	NA	A0A2T1DLY1		Phormidesmis priestleyi ULC007				annotated		Bacteria; Cyanobacteria; Synechococcales; Leptolyngbyaceae; Phormidesmis	268141
150	250	tr|A0A2T1DG55|A0A2T1DG55_9CYAN	6	1192	50S ribosomal protein L1 OS=Phormidesmis priestleyi ULC007 OX=1920490 GN=rplA PE=3 SV=1	1920490	7	5	7	2	4	NA	A0A2T1DG55		Phormidesmis priestleyi ULC007				annotated		Bacteria; Cyanobacteria; Synechococcales; Leptolyngbyaceae; Phormidesmis	268141
151	282	tr|A0A2T1DL37|A0A2T1DL37_9CYAN	5	1207	Glutamine synthetase OS=Phormidesmis priestleyi ULC007 OX=1920490 GN=glnA PE=3 SV=1	1920490	NA	11	6	NA	2	NA	A0A2T1DL37		Phormidesmis priestleyi ULC007				annotated		Bacteria; Cyanobacteria; Synechococcales; Leptolyngbyaceae; Phormidesmis	268141
152	293	tr|A0A2T1DLZ3|A0A2T1DLZ3_9CYAN	7	1225	50S ribosomal protein L2 OS=Phormidesmis priestleyi ULC007 OX=1920490 GN=rplB PE=3 SV=1	1920490	5	8	5	3	2	NA	A0A2T1DLZ3		Phormidesmis priestleyi ULC007				annotated		Bacteria; Cyanobacteria; Synechococcales; Leptolyngbyaceae; Phormidesmis	268141
156	232	tr|A0A2T1DEW5|A0A2T1DEW5_9CYAN	5	1270	Glutathione S-transferase family protein OS=Phormidesmis priestleyi ULC007 OX=1920490 GN=C7B65_13455 PE=4 SV=1	1920490	NA	10	7	2	NA	NA	A0A2T1DEW5		Phormidesmis priestleyi ULC007				annotated		Bacteria; Cyanobacteria; Synechococcales; Leptolyngbyaceae; Phormidesmis	268141
163	213	tr|A0A2T1DAQ6|A0A2T1DAQ6_9CYAN	4	1324	Carbon dioxide concentrating mechanism protein CcmL OS=Phormidesmis priestleyi ULC007 OX=1920490 GN=C7B65_18050 PE=4 SV=1	1920490	7	5	6	6	NA	NA	A0A2T1DAQ6		Phormidesmis priestleyi ULC007				annotated		Bacteria; Cyanobacteria; Synechococcales; Leptolyngbyaceae; Phormidesmis	268141
167	288	tr|A0A2T1DLW4|A0A2T1DLW4_9CYAN	5	1351	50S ribosomal protein L23 OS=Phormidesmis priestleyi ULC007 OX=1920490 GN=rplW PE=3 SV=1	1920490	5	7	7	3	2	NA	A0A2T1DLW4		Phormidesmis priestleyi ULC007				annotated		Bacteria; Cyanobacteria; Synechococcales; Leptolyngbyaceae; Phormidesmis	268141
169	283	tr|A0A2T1DL99|A0A2T1DL99_9CYAN	6	1354	Allophycocyanin subunit beta OS=Phormidesmis priestleyi ULC007 OX=1920490 GN=apcB PE=3 SV=1	1920490	NA	4	3	4	6	NA	A0A2T1DL99		Phormidesmis priestleyi ULC007				annotated		Bacteria; Cyanobacteria; Synechococcales; Leptolyngbyaceae; Phormidesmis	268141
172	229	tr|A0A2T1DDJ6|A0A2T1DDJ6_9CYAN	3	1374	DUF3769 domain-containing protein OS=Phormidesmis priestleyi ULC007 OX=1920490 GN=C7B65_14635 PE=4 SV=1	1920490	5	8	11	NA	NA	NA	A0A2T1DDJ6		Phormidesmis priestleyi ULC007				annotated		Bacteria; Cyanobacteria; Synechococcales; Leptolyngbyaceae; Phormidesmis	268141
177	266	tr|A0A2T1DIK6|A0A2T1DIK6_9CYAN	5	1420	Cytochrome f OS=Phormidesmis priestleyi ULC007 OX=1920490 GN=petA PE=3 SV=1	1920490	8	2	8	3	2	NA	A0A2T1DIK6		Phormidesmis priestleyi ULC007				annotated		Bacteria; Cyanobacteria; Synechococcales; Leptolyngbyaceae; Phormidesmis	268141
179	240	tr|A0A2T1DFJ7|A0A2T1DFJ7_9CYAN	4	1440	Phosphoglycerate kinase OS=Phormidesmis priestleyi ULC007 OX=1920490 GN=pgk PE=3 SV=1	1920490	6	8	4	2	NA	NA	A0A2T1DFJ7		Phormidesmis priestleyi ULC007				annotated		Bacteria; Cyanobacteria; Synechococcales; Leptolyngbyaceae; Phormidesmis	268141
184	191	tr|A0A2T1D5T1|A0A2T1D5T1_9CYAN	4	1484	Transketolase OS=Phormidesmis priestleyi ULC007 OX=1920490 GN=tkt PE=3 SV=1	1920490	5	9	3	NA	3	NA	A0A2T1D5T1		Phormidesmis priestleyi ULC007				annotated		Bacteria; Cyanobacteria; Synechococcales; Leptolyngbyaceae; Phormidesmis	268141
186	245	tr|A0A2T1DFZ4|A0A2T1DFZ4_9CYAN	5	1498	50S ribosomal protein L11 OS=Phormidesmis priestleyi ULC007 OX=1920490 GN=rplK PE=3 SV=1	1920490	4	2	10	3	3	NA	A0A2T1DFZ4		Phormidesmis priestleyi ULC007				annotated		Bacteria; Cyanobacteria; Synechococcales; Leptolyngbyaceae; Phormidesmis	268141
187	262	tr|A0A2T1DHY8|A0A2T1DHY8_9CYAN	6	1500	Uncharacterized protein OS=Phormidesmis priestleyi ULC007 OX=1920490 GN=C7B65_08525 PE=4 SV=1	1920490	6	4	6	2	2	NA	A0A2T1DHY8		Phormidesmis priestleyi ULC007				annotated		Bacteria; Cyanobacteria; Synechococcales; Leptolyngbyaceae; Phormidesmis	268141
190	242	tr|A0A2T1DFN1|A0A2T1DFN1_9CYAN	5	1517	Chaperone protein ClpB OS=Phormidesmis priestleyi ULC007 OX=1920490 GN=clpB PE=3 SV=1	1920490	NA	3	NA	NA	NA	NA	A0A2T1DFN1		Phormidesmis priestleyi ULC007				annotated		Bacteria; Cyanobacteria; Synechococcales; Leptolyngbyaceae; Phormidesmis	268141
194	280	tr|A0A2T1DL03|A0A2T1DL03_9CYAN	4	1575	Photosystem I reaction center subunit XII OS=Phormidesmis priestleyi ULC007 OX=1920490 GN=C7B65_04095 PE=3 SV=1	1920490	2	5	8	NA	3	NA	A0A2T1DL03		Phormidesmis priestleyi ULC007				annotated		Bacteria; Cyanobacteria; Synechococcales; Leptolyngbyaceae; Phormidesmis	268141
195	298	tr|A0A2T1DMD6|A0A2T1DMD6_9CYAN	4	1594	30S ribosomal protein S18 OS=Phormidesmis priestleyi ULC007 OX=1920490 GN=rpsR PE=3 SV=1	1920490	8	6	4	NA	NA	NA	A0A2T1DMD6		Phormidesmis priestleyi ULC007				annotated		Bacteria; Cyanobacteria; Synechococcales; Leptolyngbyaceae; Phormidesmis	268141
196	186	tr|A0A2T1D3J8|A0A2T1D3J8_9CYAN	3	1596	ATP-dependent Clp protease proteolytic subunit OS=Phormidesmis priestleyi ULC007 OX=1920490 GN=clpP PE=3 SV=1	1920490	NA	11	5	NA	NA	NA	A0A2T1D3J8		Phormidesmis priestleyi ULC007				annotated		Bacteria; Cyanobacteria; Synechococcales; Leptolyngbyaceae; Phormidesmis	268141
202	271	tr|A0A2T1DK33|A0A2T1DK33_9CYAN	4	1654	D-3-phosphoglycerate dehydrogenase OS=Phormidesmis priestleyi ULC007 OX=1920490 GN=C7B65_05230 PE=3 SV=1	1920490	NA	11	2	NA	NA	NA	A0A2T1DK33		Phormidesmis priestleyi ULC007				annotated		Bacteria; Cyanobacteria; Synechococcales; Leptolyngbyaceae; Phormidesmis	268141
207	260	tr|A0A2T1DHF5|A0A2T1DHF5_9CYAN	4	1679	Universal stress protein OS=Phormidesmis priestleyi ULC007 OX=1920490 GN=C7B65_09550 PE=3 SV=1	1920490	4	5	7	NA	NA	NA	A0A2T1DHF5		Phormidesmis priestleyi ULC007				annotated		Bacteria; Cyanobacteria; Synechococcales; Leptolyngbyaceae; Phormidesmis	268141
208	241	tr|A0A2T1DFM3|A0A2T1DFM3_9CYAN	2	1682	OstA-like family protein OS=Phormidesmis priestleyi ULC007 OX=1920490 GN=C7B65_11860 PE=4 SV=1	1920490	10	NA	6	NA	NA	NA	A0A2T1DFM3		Phormidesmis priestleyi ULC007				annotated		Bacteria; Cyanobacteria; Synechococcales; Leptolyngbyaceae; Phormidesmis	268141
210	235	tr|A0A2T1DF88|A0A2T1DF88_9CYAN	4	1699	Elongation factor Ts OS=Phormidesmis priestleyi ULC007 OX=1920490 GN=tsf PE=3 SV=1	1920490	2	7	4	4	NA	NA	A0A2T1DF88		Phormidesmis priestleyi ULC007				annotated		Bacteria; Cyanobacteria; Synechococcales; Leptolyngbyaceae; Phormidesmis	268141
211	274	tr|A0A2T1DKM2|A0A2T1DKM2_9CYAN	3	1717	Glycerophosphodiester phosphodiesterase OS=Phormidesmis priestleyi ULC007 OX=1920490 GN=C7B65_05990 PE=4 SV=1	1920490	3	4	10	NA	NA	NA	A0A2T1DKM2		Phormidesmis priestleyi ULC007				annotated		Bacteria; Cyanobacteria; Synechococcales; Leptolyngbyaceae; Phormidesmis	268141
212	279	tr|A0A2T1DKX0|A0A2T1DKX0_9CYAN	2	1724	Peptidase S41 OS=Phormidesmis priestleyi ULC007 OX=1920490 GN=C7B65_04190 PE=3 SV=1	1920490	7	NA	9	NA	NA	NA	A0A2T1DKX0		Phormidesmis priestleyi ULC007				annotated		Bacteria; Cyanobacteria; Synechococcales; Leptolyngbyaceae; Phormidesmis	268141
215	197	tr|A0A2T1D6L3|A0A2T1D6L3_9CYAN	4	1736	Zn-dependent hydrolase OS=Phormidesmis priestleyi ULC007 OX=1920490 GN=C7B65_22635 PE=4 SV=1	1920490	4	3	9	NA	2	NA	A0A2T1D6L3		Phormidesmis priestleyi ULC007				annotated		Bacteria; Cyanobacteria; Synechococcales; Leptolyngbyaceae; Phormidesmis	268141
220	199	tr|A0A2T1D781|A0A2T1D781_9CYAN	2	1757	6-phosphogluconate dehydrogenase decarboxylating OS=Phormidesmis priestleyi ULC007 OX=1920490 GN=C7B65_22025 PE=3 SV=1	1920490	NA	11	4	NA	NA	NA	A0A2T1D781		Phormidesmis priestleyi ULC007				annotated		Bacteria; Cyanobacteria; Synechococcales; Leptolyngbyaceae; Phormidesmis	268141
222	264	tr|A0A2T1DIB3|A0A2T1DIB3_9CYAN	5	1766	Thiamine biosynthesis protein OS=Phormidesmis priestleyi ULC007 OX=1920490 GN=C7B65_08980 PE=4 SV=1	1920490	4	2	7	2	2	NA	A0A2T1DIB3		Phormidesmis priestleyi ULC007				annotated		Bacteria; Cyanobacteria; Synechococcales; Leptolyngbyaceae; Phormidesmis	268141
224	292	tr|A0A2T1DLY2|A0A2T1DLY2_9CYAN	4	1776	50S ribosomal protein L15 OS=Phormidesmis priestleyi ULC007 OX=1920490 GN=rplO PE=3 SV=1	1920490	3	5	6	NA	NA	NA	A0A2T1DLY2		Phormidesmis priestleyi ULC007				annotated		Bacteria; Cyanobacteria; Synechococcales; Leptolyngbyaceae; Phormidesmis	268141
225	193	tr|A0A2T1D614|A0A2T1D614_9CYAN	3	1784	N-acetylmuramoyl-L-alanine amidase OS=Phormidesmis priestleyi ULC007 OX=1920490 GN=C7B65_23085 PE=4 SV=1	1920490	5	NA	7	3	NA	NA	A0A2T1D614		Phormidesmis priestleyi ULC007				annotated		Bacteria; Cyanobacteria; Synechococcales; Leptolyngbyaceae; Phormidesmis	268141
230	305	tr|A0A2T1DNJ3|A0A2T1DNJ3_9CYAN	4	1804	Cupin domain-containing protein OS=Phormidesmis priestleyi ULC007 OX=1920490 GN=C7B65_01075 PE=4 SV=1	1920490	2	2	4	7	NA	NA	A0A2T1DNJ3		Phormidesmis priestleyi ULC007				annotated		Bacteria; Cyanobacteria; Synechococcales; Leptolyngbyaceae; Phormidesmis	268141
232	234	tr|A0A2T1DF81|A0A2T1DF81_9CYAN	3	1812	Tetratricopeptide repeat protein OS=Phormidesmis priestleyi ULC007 OX=1920490 GN=C7B65_12600 PE=4 SV=1	1920490	6	NA	4	4	NA	NA	A0A2T1DF81		Phormidesmis priestleyi ULC007				annotated		Bacteria; Cyanobacteria; Synechococcales; Leptolyngbyaceae; Phormidesmis	268141
234	300	tr|A0A2T1DMM9|A0A2T1DMM9_9CYAN	4	1861	Photosystem I reaction center subunit XI OS=Phormidesmis priestleyi ULC007 OX=1920490 GN=psaL PE=3 SV=1	1920490	NA	5	5	3	NA	NA	A0A2T1DMM9		Phormidesmis priestleyi ULC007				annotated		Bacteria; Cyanobacteria; Synechococcales; Leptolyngbyaceae; Phormidesmis	268141
236	294	tr|A0A2T1DLZ5|A0A2T1DLZ5_9CYAN	5	1869	50S ribosomal protein L3 OS=Phormidesmis priestleyi ULC007 OX=1920490 GN=rplC PE=3 SV=1	1920490	2	4	4	2	2	NA	A0A2T1DLZ5		Phormidesmis priestleyi ULC007				annotated		Bacteria; Cyanobacteria; Synechococcales; Leptolyngbyaceae; Phormidesmis	268141
239	296	tr|A0A2T1DM10|A0A2T1DM10_9CYAN	3	1884	50S ribosomal protein L29 OS=Phormidesmis priestleyi ULC007 OX=1920490 GN=rpmC PE=3 SV=1	1920490	3	6	5	NA	NA	NA	A0A2T1DM10		Phormidesmis priestleyi ULC007				annotated		Bacteria; Cyanobacteria; Synechococcales; Leptolyngbyaceae; Phormidesmis	268141
242	224	tr|A0A2T1DCX1|A0A2T1DCX1_9CYAN	2	1909	Probable phosphoketolase OS=Phormidesmis priestleyi ULC007 OX=1920490 GN=C7B65_15685 PE=3 SV=1	1920490	2	11	NA	NA	NA	NA	A0A2T1DCX1		Phormidesmis priestleyi ULC007				annotated		Bacteria; Cyanobacteria; Synechococcales; Leptolyngbyaceae; Phormidesmis	268141
245	216	tr|A0A2T1DB89|A0A2T1DB89_9CYAN	4	1923	Nucleoid-associated protein C7B65_17660 OS=Phormidesmis priestleyi ULC007 OX=1920490 GN=C7B65_17660 PE=3 SV=1	1920490	2	NA	2	6	NA	NA	A0A2T1DB89		Phormidesmis priestleyi ULC007				annotated		Bacteria; Cyanobacteria; Synechococcales; Leptolyngbyaceae; Phormidesmis	268141
246	255	tr|A0A2T1DGE7|A0A2T1DGE7_9CYAN	3	1926	GMP synthase [glutamine-hydrolyzing] OS=Phormidesmis priestleyi ULC007 OX=1920490 GN=guaA PE=3 SV=1	1920490	NA	8	NA	NA	NA	NA	A0A2T1DGE7		Phormidesmis priestleyi ULC007				annotated		Bacteria; Cyanobacteria; Synechococcales; Leptolyngbyaceae; Phormidesmis	268141
248	238	tr|A0A2T1DFJ0|A0A2T1DFJ0_9CYAN	4	1945	Uncharacterized protein OS=Phormidesmis priestleyi ULC007 OX=1920490 GN=C7B65_11645 PE=4 SV=1	1920490	NA	4	3	2	NA	NA	A0A2T1DFJ0		Phormidesmis priestleyi ULC007				annotated		Bacteria; Cyanobacteria; Synechococcales; Leptolyngbyaceae; Phormidesmis	268141
256	210	tr|A0A2T1D9K3|A0A2T1D9K3_9CYAN	3	1987	BMP family ABC transporter substrate-binding protein OS=Phormidesmis priestleyi ULC007 OX=1920490 GN=C7B65_19635 PE=4 SV=1	1920490	4	7	2	NA	NA	NA	A0A2T1D9K3		Phormidesmis priestleyi ULC007				annotated		Bacteria; Cyanobacteria; Synechococcales; Leptolyngbyaceae; Phormidesmis	268141
261	275	tr|A0A2T1DKN7|A0A2T1DKN7_9CYAN	4	2015	Uncharacterized protein OS=Phormidesmis priestleyi ULC007 OX=1920490 GN=C7B65_05220 PE=4 SV=1	1920490	3	2	6	3	NA	NA	A0A2T1DKN7		Phormidesmis priestleyi ULC007				annotated		Bacteria; Cyanobacteria; Synechococcales; Leptolyngbyaceae; Phormidesmis	268141
263	269	tr|A0A2T1DJK5|A0A2T1DJK5_9CYAN	3	2019	Aldo/keto reductase OS=Phormidesmis priestleyi ULC007 OX=1920490 GN=C7B65_07210 PE=3 SV=1	1920490	4	6	2	NA	NA	NA	A0A2T1DJK5		Phormidesmis priestleyi ULC007				annotated		Bacteria; Cyanobacteria; Synechococcales; Leptolyngbyaceae; Phormidesmis	268141
267	284	tr|A0A2T1DLE8|A0A2T1DLE8_9CYAN	4	2062	Phycobilisome linker polypeptide OS=Phormidesmis priestleyi ULC007 OX=1920490 GN=C7B65_04100 PE=4 SV=1	1920490	3	NA	5	3	2	NA	A0A2T1DLE8		Phormidesmis priestleyi ULC007				annotated		Bacteria; Cyanobacteria; Synechococcales; Leptolyngbyaceae; Phormidesmis	268141
270	303	tr|A0A2T1DNF6|A0A2T1DNF6_9CYAN	2	2100	ATP-dependent zinc metalloprotease FtsH OS=Phormidesmis priestleyi ULC007 OX=1920490 GN=ftsH PE=3 SV=1	1920490	NA	6	NA	NA	NA	NA	A0A2T1DNF6		Phormidesmis priestleyi ULC007				annotated		Bacteria; Cyanobacteria; Synechococcales; Leptolyngbyaceae; Phormidesmis	268141
276	204	tr|A0A2T1D8C5|A0A2T1D8C5_9CYAN	4	2185	Histidinol dehydrogenase OS=Phormidesmis priestleyi ULC007 OX=1920490 GN=hisD PE=3 SV=1	1920490	NA	2	2	NA	NA	NA	A0A2T1D8C5		Phormidesmis priestleyi ULC007				annotated		Bacteria; Cyanobacteria; Synechococcales; Leptolyngbyaceae; Phormidesmis	268141
284	299	tr|A0A2T1DME1|A0A2T1DME1_9CYAN	2	2274	Tetratricopeptide repeat protein OS=Phormidesmis priestleyi ULC007 OX=1920490 GN=C7B65_03470 PE=4 SV=1	1920490	NA	3	6	NA	NA	NA	A0A2T1DME1		Phormidesmis priestleyi ULC007				annotated		Bacteria; Cyanobacteria; Synechococcales; Leptolyngbyaceae; Phormidesmis	268141
286	233	tr|A0A2T1DF44|A0A2T1DF44_9CYAN	3	2289	Phosphoribulokinase OS=Phormidesmis priestleyi ULC007 OX=1920490 GN=C7B65_12485 PE=3 SV=1	1920490	NA	3	NA	NA	NA	NA	A0A2T1DF44		Phormidesmis priestleyi ULC007				annotated		Bacteria; Cyanobacteria; Synechococcales; Leptolyngbyaceae; Phormidesmis	268141
287	198	tr|A0A2T1D6P2|A0A2T1D6P2_9CYAN	3	2292	Uncharacterized protein OS=Phormidesmis priestleyi ULC007 OX=1920490 GN=C7B65_22405 PE=4 SV=1	1920490	4	4	2	NA	NA	NA	A0A2T1D6P2		Phormidesmis priestleyi ULC007				annotated		Bacteria; Cyanobacteria; Synechococcales; Leptolyngbyaceae; Phormidesmis	268141
291	237	tr|A0A2T1DFI9|A0A2T1DFI9_9CYAN	3	2311	RNA-binding protein OS=Phormidesmis priestleyi ULC007 OX=1920490 GN=C7B65_11950 PE=4 SV=1	1920490	4	NA	3	NA	2	NA	A0A2T1DFI9		Phormidesmis priestleyi ULC007				annotated		Bacteria; Cyanobacteria; Synechococcales; Leptolyngbyaceae; Phormidesmis	268141
294	202	tr|A0A2T1D7A7|A0A2T1D7A7_9CYAN	3	2331	Peptidase_C39_2 domain-containing protein OS=Phormidesmis priestleyi ULC007 OX=1920490 GN=C7B65_21795 PE=4 SV=1	1920490	2	5	4	NA	NA	NA	A0A2T1D7A7		Phormidesmis priestleyi ULC007				annotated		Bacteria; Cyanobacteria; Synechococcales; Leptolyngbyaceae; Phormidesmis	268141
298	192	tr|A0A2T1D5Y9|A0A2T1D5Y9_9CYAN	3	2395	Uncharacterized protein OS=Phormidesmis priestleyi ULC007 OX=1920490 GN=C7B65_23040 PE=4 SV=1	1920490	NA	3	3	3	NA	NA	A0A2T1D5Y9		Phormidesmis priestleyi ULC007				annotated		Bacteria; Cyanobacteria; Synechococcales; Leptolyngbyaceae; Phormidesmis	268141
308	230	tr|A0A2T1DE63|A0A2T1DE63_9CYAN	3	2480	Uncharacterized protein OS=Phormidesmis priestleyi ULC007 OX=1920490 GN=C7B65_14370 PE=4 SV=1	1920490	2	5	2	NA	NA	NA	A0A2T1DE63		Phormidesmis priestleyi ULC007				annotated		Bacteria; Cyanobacteria; Synechococcales; Leptolyngbyaceae; Phormidesmis	268141
309	304	tr|A0A2T1DNH6|A0A2T1DNH6_9CYAN	3	2486	TldD/PmbA family protein OS=Phormidesmis priestleyi ULC007 OX=1920490 GN=C7B65_00900 PE=3 SV=1	1920490	2	4	3	NA	NA	NA	A0A2T1DNH6		Phormidesmis priestleyi ULC007				annotated		Bacteria; Cyanobacteria; Synechococcales; Leptolyngbyaceae; Phormidesmis	268141
310	273	tr|A0A2T1DKH7|A0A2T1DKH7_9CYAN	2	2491	Molybdopterin-synthase adenylyltransferase MoeB OS=Phormidesmis priestleyi ULC007 OX=1920490 GN=C7B65_05880 PE=4 SV=1	1920490	NA	5	NA	NA	NA	NA	A0A2T1DKH7		Phormidesmis priestleyi ULC007				annotated		Bacteria; Cyanobacteria; Synechococcales; Leptolyngbyaceae; Phormidesmis	268141
312	278	tr|A0A2T1DKW8|A0A2T1DKW8_9CYAN	2	2518	Single-stranded DNA-binding protein OS=Phormidesmis priestleyi ULC007 OX=1920490 GN=C7B65_04145 PE=4 SV=1	1920490	3	NA	4	NA	NA	NA	A0A2T1DKW8		Phormidesmis priestleyi ULC007				annotated		Bacteria; Cyanobacteria; Synechococcales; Leptolyngbyaceae; Phormidesmis	268141
314	209	tr|A0A2T1D9F0|A0A2T1D9F0_9CYAN	2	2567	Cell envelope biogenesis protein OmpA OS=Phormidesmis priestleyi ULC007 OX=1920490 GN=C7B65_19815 PE=4 SV=1	1920490	3	NA	4	NA	NA	NA	A0A2T1D9F0		Phormidesmis priestleyi ULC007				annotated		Bacteria; Cyanobacteria; Synechococcales; Leptolyngbyaceae; Phormidesmis	268141
322	215	tr|A0A2T1DAY7|A0A2T1DAY7_9CYAN	2	2614	Carbon dioxide concentrating mechanism protein CcmM OS=Phormidesmis priestleyi ULC007 OX=1920490 GN=C7B65_18055 PE=3 SV=1	1920490	NA	5	2	NA	NA	NA	A0A2T1DAY7		Phormidesmis priestleyi ULC007				annotated		Bacteria; Cyanobacteria; Synechococcales; Leptolyngbyaceae; Phormidesmis	268141
327	265	tr|A0A2T1DIH2|A0A2T1DIH2_9CYAN	2	2647	Cytochrome b6-f complex iron-sulfur subunit OS=Phormidesmis priestleyi ULC007 OX=1920490 GN=petC PE=3 SV=1	1920490	2	NA	6	NA	NA	NA	A0A2T1DIH2		Phormidesmis priestleyi ULC007				annotated		Bacteria; Cyanobacteria; Synechococcales; Leptolyngbyaceae; Phormidesmis	268141
331	247	tr|A0A2T1DG14|A0A2T1DG14_9CYAN	3	2658	Uncharacterized protein OS=Phormidesmis priestleyi ULC007 OX=1920490 GN=C7B65_10850 PE=4 SV=1	1920490	2	NA	2	NA	2	NA	A0A2T1DG14		Phormidesmis priestleyi ULC007				annotated		Bacteria; Cyanobacteria; Synechococcales; Leptolyngbyaceae; Phormidesmis	268141
343	207	tr|A0A2T1D8R8|A0A2T1D8R8_9CYAN	2	2820	Putative selenate ABC transporter substrate-binding protein OS=Phormidesmis priestleyi ULC007 OX=1920490 GN=C7B65_20450 PE=3 SV=1	1920490	NA	2	3	NA	NA	NA	A0A2T1D8R8		Phormidesmis priestleyi ULC007				annotated		Bacteria; Cyanobacteria; Synechococcales; Leptolyngbyaceae; Phormidesmis	268141
344	251	tr|A0A2T1DG78|A0A2T1DG78_9CYAN	2	2836	Uncharacterized protein OS=Phormidesmis priestleyi ULC007 OX=1920490 GN=C7B65_11370 PE=4 SV=1	1920490	NA	NA	3	2	NA	NA	A0A2T1DG78		Phormidesmis priestleyi ULC007				annotated		Bacteria; Cyanobacteria; Synechococcales; Leptolyngbyaceae; Phormidesmis	268141
350	214	tr|A0A2T1DAS5|A0A2T1DAS5_9CYAN	2	2863	Ribose-5-phosphate isomerase A OS=Phormidesmis priestleyi ULC007 OX=1920490 GN=rpiA PE=3 SV=1	1920490	NA	2	3	NA	NA	NA	A0A2T1DAS5		Phormidesmis priestleyi ULC007				annotated		Bacteria; Cyanobacteria; Synechococcales; Leptolyngbyaceae; Phormidesmis	268141
353	263	tr|A0A2T1DI12|A0A2T1DI12_9CYAN	2	2872	Fe-S cluster assembly protein SufD OS=Phormidesmis priestleyi ULC007 OX=1920490 GN=sufD PE=3 SV=1	1920490	NA	2	3	NA	NA	NA	A0A2T1DI12		Phormidesmis priestleyi ULC007				annotated		Bacteria; Cyanobacteria; Synechococcales; Leptolyngbyaceae; Phormidesmis	268141
42	311	tr|A0A2T1E0P4|A0A2T1E0P4_9CYAN	9	369	S-layer protein OS=Stenomitos frigidus ULC18 OX=2107698 GN=C7B82_20145 PE=3 SV=1	2107698	9	10	13	8	7	NA	A0A2T1E0P4		Stenomitos frigidus ULC18			Leptolyngbya frigida ULC18	annotated		Bacteria; Cyanobacteria; Synechococcales; Leptolyngbyaceae; Stenomitos	1886765
61	309	tr|A0A2T1DYS7|A0A2T1DYS7_9CYAN	5	484	Phosphate-binding protein OS=Stenomitos frigidus ULC18 OX=2107698 GN=pstS PE=3 SV=1	2107698	14	17	19	9	5	NA	A0A2T1DYS7		Stenomitos frigidus ULC18			Leptolyngbya frigida ULC18	annotated		Bacteria; Cyanobacteria; Synechococcales; Leptolyngbyaceae; Stenomitos	1886765
316	317	tr|A0A2T1EP47|A0A2T1EP47_9CYAN	3	2574	NTP_transf_9 domain-containing protein OS=Stenomitos frigidus ULC18 OX=2107698 GN=C7B82_02990 PE=4 SV=1	2107698	2	NA	2	NA	NA	NA	A0A2T1EP47		Stenomitos frigidus ULC18			Leptolyngbya frigida ULC18	annotated		Bacteria; Cyanobacteria; Synechococcales; Leptolyngbyaceae; Stenomitos	1886765
40	340	tr|A0A2W4XH96|A0A2W4XH96_9CYAN	7	353	Fasciclin OS=Shackletoniella antarctica OX=268115 GN=DCF17_19075 PE=4 SV=1	268115	4	NA	3	NA	NA	NA	A0A2W4XH96		Shackletoniella antarctica			CBFS A-155; Leptolyngbya antarctica; Leptolyngbya antarctica (West & G.S.West, 1911) Anagnostidis & Komarek , 1988; Phormidium antarcticum; Phormidium antarcticum West & G.S.West, 1911; Shackletoniella antarctica (West & G.S.West, 1911) Strunecky, Raabova & Bernardova, 2020; ULC037; ULC:037; personal::ANT.LH18.2; strain ANT.LH18.2	annotated	Species	Bacteria; Cyanobacteria; Synechococcales; Oculatellaceae; Shackletoniella	2784135
321	117	tr|A0A1Z3HQM9|A0A1Z3HQM9_9CYAN	3	2612	Phage shock protein A OS=Halomicronema hongdechloris C2206 OX=1641165 GN=XM38_035200 PE=3 SV=1	1641165	NA	2	NA	2	NA	NA	A0A1Z3HQM9		Halomicronema hongdechloris C2206			Halomicronema sp. C2206	annotated		Bacteria; Cyanobacteria; Synechococcales; Prochlorotrichaceae; Halomicronema	1209493
200	341	tr|A0A2W4XW24|A0A2W4XW24_9CYAN	6	1622	Uncharacterized protein OS=Pseudanabaena frigida OX=945775 GN=DCF19_15390 PE=4 SV=1	945775	2	NA	2	4	2	NA	A0A2W4XW24		Pseudanabaena frigida			Pseudanabaena frigida (Fritsch) Anagnostidis 2001	annotated	Species	Bacteria; Cyanobacteria; Synechococcales; Pseudanabaenaceae; Pseudanabaena	1152
41	1	P12834|CH601_SYNP6	9	354	60 kDa chaperonin 1 OS=Synechococcus sp. (strain ATCC 27144 / PCC 6301 / SAUG 1402/1) OX=269084 GN=groL1 PE=3 SV=2	269084	3	4	4	4	3	NA	CH601_SYNP6	SYNP6	Synechococcus sp. (strain ATCC 27144 / PCC 6301 / SAUG 1402/1)		Anacystis nidulans	Anacystis nidulans SAUG 1402-1; Synechococcus 6301; Synechococcus PCC 6301; Synechococcus PCC6301; Synechococcus elongatus PCC 6301; Synechococcus leopoliensis CCAP 1405/1; Synechococcus leopoliensis IAM M-6; Synechococcus leopoliensis SAG 1402-1; Synechococcus nidulans NIVA-CYA 20; Synechococcus sp. (ATCC 27144); Synechococcus sp. (PCC 6301); Synechococcus sp. (strain PCC 6301); Synechococcus sp…	reviewed		Bacteria; Cyanobacteria; Synechococcales; Synechococcaceae; Synechococcus	32046
281	670	tr|L0DHM7|L0DHM7_SINAD	3	2233	RRM domain-containing RNA-binding protein OS=Singulisphaera acidiphila (strain ATCC BAA-1392 / DSM 18658 / VKM B-2454 / MOB10) OX=886293 GN=Sinac_3965 PE=4 SV=1	886293	NA	NA	NA	NA	4	3	L0DHM7	SINAD	Singulisphaera acidiphila (strain ATCC BAA-1392 / DSM 18658 / VKM B-2454 / MOB10)			Singulisphaera acidiphila ATCC BAA-1392; Singulisphaera acidiphila DSM 18658; Singulisphaera acidiphila MOB10; Singulisphaera acidiphila str. DSM 18658; Singulisphaera acidiphila strain DSM 18658	reviewed		Bacteria; Planctomycetes; Planctomycetia; Isosphaerales; Isosphaeraceae; Singulisphaera	466153
330	337	tr|A0A2W4P938|A0A2W4P938_9PROT	3	2653	Sugar ABC transporter OS=Proteobacteria bacterium OX=1977087 GN=DIU65_05140 PE=4 SV=1	1977087	3	NA	NA	3	2	NA	A0A2W4P938		Proteobacteria bacterium				annotated	Species	Bacteria; Proteobacteria	81684
73	438	tr|A0A4Q5QII1|A0A4Q5QII1_9PROT	8	563	60 kDa chaperonin (Fragment) OS=Alphaproteobacteria bacterium OX=1913988 GN=groL PE=3 SV=1	1913988	5	13	12	NA	12	3	A0A4Q5QII1		Alphaproteobacteria bacterium				annotated	Species	Bacteria; Proteobacteria; Alphaproteobacteria	33807
199	439	tr|A0A4Q5QNF4|A0A4Q5QNF4_9PROT	5	1616	HU family DNA-binding protein OS=Alphaproteobacteria bacterium OX=1913988 GN=EON55_18265 PE=3 SV=1	1913988	3	4	4	NA	6	3	A0A4Q5QNF4		Alphaproteobacteria bacterium				annotated	Species	Bacteria; Proteobacteria; Alphaproteobacteria	33807
79	480	tr|A0A519Y155|A0A519Y155_9RHIZ	5	627	Porin (Fragment) OS=Methylobacterium sp. OX=409 GN=EOO66_14585 PE=4 SV=1	409	9	5	17	5	13	NA	A0A519Y155		Methylobacterium sp.				annotated	Species	Bacteria; Proteobacteria; Alphaproteobacteria; Rhizobiales; Methylobacteriaceae; Methylobacterium	2615210
271	97	tr|A0A1M5A620|A0A1M5A620_9RHIZ	3	2113	Inositol transport system substrate-binding protein OS=Kaistia soli DSM 19436 OX=1122133 GN=SAMN02745157_2026 PE=4 SV=1	1122133	NA	NA	NA	6	NA	2	A0A1M5A620		Kaistia soli DSM 19436			Kaistia soli 5YN9-8; Kaistia soli NBRC 106436	annotated		Bacteria; Proteobacteria; Alphaproteobacteria; Rhizobiales; Rhizobiaceae; Kaistia	446684
197	4	tr|A0A074TKP4|A0A074TKP4_9RHOB	2	1604	30S ribosomal protein S19 OS=Thioclava dalianensis OX=1185766 GN=rpsS PE=3 SV=1	1185766	5	NA	14	NA	NA	NA	A0A074TKP4		Thioclava dalianensis			CGMCC 1.12325; LMG 27290; LMG:27290; MCCC 1A03957; Thioclava dalianensis Zhang et al. 2013; Thioclava sp. DLFJ1-1; strain DLFJ1-1	annotated	Species	Bacteria; Proteobacteria; Alphaproteobacteria; Rhodobacterales; Rhodobacteraceae; Thioclava	285107
53	159	tr|A0A259MK25|A0A259MK25_9PROT	8	429	Fasciclin OS=Rhodospirillales bacterium 39-66-50 OX=1970570 GN=B7X63_15405 PE=4 SV=1	1970570	16	8	18	9	11	7	A0A259MK25		Rhodospirillales bacterium 39-66-50				annotated	Species	Bacteria; Proteobacteria; Alphaproteobacteria; Rhodospirillales	941843
148	96	tr|A0A1M3PFE5|A0A1M3PFE5_9PROT	6	1189	Superoxide dismutase OS=Rhodospirillales bacterium 70-18 OX=1895826 GN=BGP12_18950 PE=3 SV=1	1895826	6	4	5	4	6	3	A0A1M3PFE5		Rhodospirillales bacterium 70-18				annotated	Species	Bacteria; Proteobacteria; Alphaproteobacteria; Rhodospirillales	941843
164	12	tr|A0A094YRD2|A0A094YRD2_9PROT	5	1327	Membrane protein OS=Acetobacter tropicalis OX=104102 GN=AD947_12720 PE=4 SV=1	104102	3	4	8	4	6	NA	A0A094YRD2		Acetobacter tropicalis			Acetobacter tropicalis Lisdiyanti et al. 2001; IFO 16470; JCM 10947; LMG 19825; LMG:19825; NBRC 16470; NRIC 0312; strain Ni-6b	annotated	Species	Bacteria; Proteobacteria; Alphaproteobacteria; Rhodospirillales; Acetobacteraceae; Acetobacter	434
285	19	tr|A0A0D6P902|A0A0D6P902_9PROT	3	2283	Oxidoreductase OS=Acidisphaera rubrifaciens HS-AP3 OX=1231350 GN=Asru_0478_10 PE=4 SV=1	1231350	2	6	3	NA	NA	NA	A0A0D6P902		Acidisphaera rubrifaciens HS-AP3				annotated		Bacteria; Proteobacteria; Alphaproteobacteria; Rhodospirillales; Acetobacteraceae; Acidisphaera	50715
47	524	tr|A0A5R9J9Q4|A0A5R9J9Q4_9PROT	9	401	60 kDa chaperonin OS=Lichenicoccus roseus OX=2683649 GN=groL PE=3 SV=1	2683649	16	11	11	6	22	4	A0A5R9J9Q4		Lichenicoccus roseus			Acetobacteraceae bacterium KAMCLST3051; Acetobacteraceae bacterium KAMCLST3152; Acetobacteraceae bacterium KEBCLARHB70R; KCTC 72321; Lichenicoccus roseus Pankratov et al. 2020; VKM B-3305; strain KEBCLARHB70R	annotated	Species	Bacteria; Proteobacteria; Alphaproteobacteria; Rhodospirillales; Acetobacteraceae; Lichenicoccus	2781897
157	381	tr|A0A354V935|A0A354V935_9PROT	6	1271	Cold-shock protein OS=Acetobacteraceae bacterium OX=1909293 GN=DDZ81_21905 PE=4 SV=1	1909293	5	3	4	6	4	3	A0A354V935		Acetobacteraceae bacterium				annotated	Species	Bacteria; Proteobacteria; Alphaproteobacteria; Rhodospirillales; Acetobacteraceae; unclassified Acetobacteraceae	41293
268	492	tr|A0A561HVT4|A0A561HVT4_9SPHN	4	2082	Iron complex outermembrane receptor protein OS=Novosphingobium barchaimii OX=1420591 GN=FHW33_10357 PE=3 SV=1	1420591	NA	3	3	3	3	NA	A0A561HVT4		Novosphingobium barchaimii			CCM 7980; DSM 25411; Novosphingobium barchaimii Niharika et al. 2013; strain LL02	annotated	Species	Bacteria; Proteobacteria; Alphaproteobacteria; Sphingomonadales; Sphingomonadaceae; Novosphingobium	165696
357	491	tr|A0A552UAR5|A0A552UAR5_9SPHN	2	2940	TonB-dependent receptor OS=Sandarakinorhabdus sp. LB1R16 OX=2593303 GN=FMM06_13380 PE=3 SV=1	2593303	3	NA	NA	NA	NA	2	A0A552UAR5		Sandarakinorhabdus sp. LB1R16				annotated	Species	Bacteria; Proteobacteria; Alphaproteobacteria; Sphingomonadales; Sphingomonadaceae; Sandarakinorhabdus; unclassified Sandarakinorhabdus	2649915
318	7	tr|A0A084EMW0|A0A084EMW0_SPHYA	3	2608	Outer membrane receptor for ferrienterochelin and colicins OS=Sphingobium yanoikuyae OX=13690 GN=BV87_03260 PE=3 SV=1	13690	NA	NA	NA	2	3	3	A0A084EMW0	SPHYA	Sphingobium yanoikuyae		Sphingomonas yanoikuyae	ATCC 51230; Beijerinckia B1; Beijerinckia sp. B1; CCUG 28380; CCUG 31205; CIP 106726; DSM 7462; GIFU 9882; GIFU:9882; HAMBI 1842; IFO 15102; JCM 7371; LMG 11252; LMG:11252; NBRC 15102; Sphingobium sp. TJ; Sphingobium yanoikuyae (Yabuuchi et al. 1990) Takeuchi et al. 2001; Sphingomonas yanoikuyae Yabuuchi et al. 1990	reviewed	Species	Bacteria; Proteobacteria; Alphaproteobacteria; Sphingomonadales; Sphingomonadaceae; Sphingobium	165695
237	158	tr|A0A258H8D1|A0A258H8D1_9SPHN	3	1876	Nex18 symbiotically induced protein OS=Sphingomonas sp. 32-66-10 OX=1970437 GN=B7Y97_00160 PE=4 SV=1	1970437	7	4	3	NA	NA	NA	A0A258H8D1		Sphingomonas sp. 32-66-10				annotated	Species	Bacteria; Proteobacteria; Alphaproteobacteria; Sphingomonadales; Sphingomonadaceae; Sphingomonas	196159
334	105	tr|A0A1Q4E8F9|A0A1Q4E8F9_9SPHN	2	2708	DUF3597 domain-containing protein OS=Sphingomonas sp. 67-41 OX=1895850 GN=BGP17_04715 PE=4 SV=1	1895850	3	NA	3	NA	NA	NA	A0A1Q4E8F9		Sphingomonas sp. 67-41				annotated	Species	Bacteria; Proteobacteria; Alphaproteobacteria; Sphingomonadales; Sphingomonadaceae; Sphingomonas	196159
335	475	tr|A0A502G4A7|A0A502G4A7_9SPHN	2	2719	TonB-dependent receptor OS=Sphingomonas glacialis OX=658225 GN=EAH76_02215 PE=3 SV=1	658225	4	2	NA	NA	NA	NA	A0A502G4A7		Sphingomonas glacialis			CGMCC 1.8957; CIP 110131; DSM 22294; Sphingomonas glacialis Zhang et al. 2011; Sphingomonas sp. C16y; strain C16y	annotated	Species	Bacteria; Proteobacteria; Alphaproteobacteria; Sphingomonadales; Sphingomonadaceae; Sphingomonas	13687
348	343	tr|A0A2W5C5K0|A0A2W5C5K0_9SPHN	2	2852	TonB-dependent receptor OS=Sphingomonas sanxanigenens OX=397260 GN=DI623_10095 PE=3 SV=1	397260	3	NA	NA	NA	2	NA	A0A2W5C5K0		Sphingomonas sanxanigenens			CGMCC 1.6417; DSM 19645; Sphingomonas sanxanigenens Huang et al. 2009; Sphingomonas sp. NX02; Sphingomonas sp. nk02; strain NX02	annotated	Species	Bacteria; Proteobacteria; Alphaproteobacteria; Sphingomonadales; Sphingomonadaceae; Sphingomonas	13687
149	437	tr|A0A4Q3TNL4|A0A4Q3TNL4_9BURK	4	1191	Porin OS=Burkholderiales bacterium OX=1891238 GN=EON92_03565 PE=4 SV=1	1891238	NA	NA	3	6	12	5	A0A4Q3TNL4		Burkholderiales bacterium				annotated	Species	Bacteria; Proteobacteria; Betaproteobacteria; Burkholderiales	80841
254	51	tr|A0A0X8P181|A0A0X8P181_ALCXX	3	1977	DNA-directed RNA polymerase subunit beta' OS=Alcaligenes xylosoxydans xylosoxydans OX=85698 GN=rpoC PE=3 SV=1	85698	NA	4	NA	NA	NA	NA	A0A0X8P181	ALCXX	Alcaligenes xylosoxydans xylosoxydans		Achromobacter xylosoxidans	"Achromobacter xylosoxidans" Yabuuchi and Ohyama 1971; ATCC 27061; Achromobacter sp. 2789STDY5608606; Achromobacter sp. 2789STDY5608609; Achromobacter sp. 2789STDY5608611; Achromobacter sp. 2789STDY5608612; Achromobacter sp. 2789STDY5608616; Achromobacter sp. 2789STDY5608618; Achromobacter sp. 2789STDY5608619; Achromobacter sp. 2789STDY5608620; Achromobacter sp. 2789STDY5608622; Achromobacter sp.…	reviewed	Species	Bacteria; Proteobacteria; Betaproteobacteria; Burkholderiales; Alcaligenaceae; Achromobacter	222
346	436	tr|A0A4Q3MJI0|A0A4Q3MJI0_9BURK	2	2848	Phosphate-binding protein PstS (Fragment) OS=Comamonadaceae bacterium OX=1871071 GN=pstS PE=3 SV=1	1871071	NA	NA	NA	3	3	NA	A0A4Q3MJI0		Comamonadaceae bacterium				annotated	Species	Bacteria; Proteobacteria; Betaproteobacteria; Burkholderiales; Comamonadaceae	83494
279	37	tr|A0A0Q6W7P5|A0A0Q6W7P5_9BURK	4	2220	Uncharacterized protein OS=Pelomonas sp. Root1237 OX=1736434 GN=ASC91_20200 PE=4 SV=1	1736434	NA	2	NA	NA	3	NA	A0A0Q6W7P5		Pelomonas sp. Root1237				annotated	Species	Bacteria; Proteobacteria; Betaproteobacteria; Burkholderiales; Comamonadaceae; Pelomonas; unclassified Pelomonas	2638132
280	36	tr|A0A0Q6TVW7|A0A0Q6TVW7_9BURK	2	2231	RNA-binding protein OS=Pelomonas sp. Root1217 OX=1736430 GN=ASC95_10405 PE=4 SV=1	1736430	NA	NA	NA	6	3	NA	A0A0Q6TVW7		Pelomonas sp. Root1217				annotated	Species	Bacteria; Proteobacteria; Betaproteobacteria; Burkholderiales; Comamonadaceae; Pelomonas; unclassified Pelomonas	2638132
259	522	tr|A0A5Q3HJG5|A0A5Q3HJG5_9BURK	4	2005	Phasin family protein OS=Polaromonas sp. Pch-P OX=2082385 GN=F7R28_15960 PE=4 SV=1	2082385	NA	NA	2	NA	4	6	A0A5Q3HJG5		Polaromonas sp. Pch-P				annotated	Species	Bacteria; Proteobacteria; Betaproteobacteria; Burkholderiales; Comamonadaceae; Polaromonas; unclassified Polaromonas	2638319
354	389	tr|A0A3C0YB48|A0A3C0YB48_9BURK	2	2873	Transporter OS=Polaromonas sp. OX=1869339 GN=DCP03_17800 PE=4 SV=1	1869339	NA	NA	NA	NA	3	3	A0A3C0YB48		Polaromonas sp.				annotated	Species	Bacteria; Proteobacteria; Betaproteobacteria; Burkholderiales; Comamonadaceae; Polaromonas; unclassified Polaromonas	2638319
13	591	tr|A0A7G8W4X9|A0A7G8W4X9_9BURK	6	119	Porin OS=Variovorax sp. PAMC28562 OX=2762323 GN=H7F36_09650 PE=4 SV=1	2762323	13	10	18	28	71	57	A0A7G8W4X9		Variovorax sp. PAMC28562				annotated	Species	Bacteria; Proteobacteria; Betaproteobacteria; Burkholderiales; Comamonadaceae; Variovorax	663243
71	588	tr|A0A7G8VV73|A0A7G8VV73_9BURK	7	545	OmpA family protein OS=Variovorax sp. PAMC28562 OX=2762323 GN=H7F36_12200 PE=4 SV=1	2762323	2	3	6	5	28	11	A0A7G8VV73		Variovorax sp. PAMC28562				annotated	Species	Bacteria; Proteobacteria; Betaproteobacteria; Burkholderiales; Comamonadaceae; Variovorax	663243
95	589	tr|A0A7G8VYV3|A0A7G8VYV3_9BURK	6	723	Fasciclin domain-containing protein OS=Variovorax sp. PAMC28562 OX=2762323 GN=H7F36_19635 PE=4 SV=1	2762323	4	NA	2	NA	5	NA	A0A7G8VYV3		Variovorax sp. PAMC28562				annotated	Species	Bacteria; Proteobacteria; Betaproteobacteria; Burkholderiales; Comamonadaceae; Variovorax	663243
214	590	tr|A0A7G8VZN1|A0A7G8VZN1_9BURK	4	1733	Phasin family protein OS=Variovorax sp. PAMC28562 OX=2762323 GN=H7F36_21235 PE=4 SV=1	2762323	NA	NA	2	NA	8	6	A0A7G8VZN1		Variovorax sp. PAMC28562				annotated	Species	Bacteria; Proteobacteria; Betaproteobacteria; Burkholderiales; Comamonadaceae; Variovorax	663243
68	435	tr|A0A4Q3IYK0|A0A4Q3IYK0_9DELT	6	520	60 kDa chaperonin OS=Myxococcales bacterium OX=2026763 GN=groL PE=3 SV=1	2026763	6	11	5	NA	30	NA	A0A4Q3IYK0		Myxococcales bacterium				annotated	Species	Bacteria; Proteobacteria; Deltaproteobacteria; Myxococcales	213495
142	22	tr|A0A0K1PM48|A0A0K1PM48_9DELT	5	1153	DNA-binding protein HU putative OS=Labilithrix luteola OX=1391654 GN=AKJ09_01261 PE=3 SV=1	1391654	4	9	7	2	6	NA	A0A0K1PM48		Labilithrix luteola			DSM 27648; Labilimyces yakushimaensis; Labilithrix luteola Yamamoto et al. 2014; NBRC 109946; Sorangiineae bacterium B00002; strain B00002	annotated	Species	Bacteria; Proteobacteria; Deltaproteobacteria; Myxococcales; Sorangiineae; Labilitrichaceae; Labilithrix	1524217
307	92	tr|A0A1I6XLN6|A0A1I6XLN6_9GAMM	2	2461	Uncaracterized surface protein containing fasciclin (FAS1) repeats OS=Pseudoalteromonas sp. DSM 26666 OX=1761892 GN=SAMN04487870_0256 PE=4 SV=1	1761892	2	NA	5	NA	NA	NA	A0A1I6XLN6		Pseudoalteromonas sp. DSM 26666			Pseudoalteromonas sp. TK-105	annotated	Species	Bacteria; Proteobacteria; Gammaproteobacteria; Alteromonadales; Pseudoalteromonadaceae; Pseudoalteromonas	194690
290	418	tr|A0A411HHG1|A0A411HHG1_9GAMM	2	2310	OmpA family protein OS=Pseudolysobacter antarcticus OX=2511995 GN=ELE36_05375 PE=4 SV=1	2511995	NA	3	NA	NA	6	NA	A0A411HHG1		Pseudolysobacter antarcticus			CCTCC AB 2016313; CCTCC:AB2016313; KCTC 52744; Pseudolysobacter antarcticus Wei et al.; Xanthomonadaceae bacterium AQ6-296; strain AQ6-296	annotated	Species	Bacteria; Proteobacteria; Gammaproteobacteria; Xanthomonadales; Xanthomonadaceae; Pseudolysobacter	2709666
153	26	tr|A0A0K2ZX84|A0A0K2ZX84_XANCT	8	1239	FAS1 domain-containing protein OS=Xanthomonas translucens pv. poae OX=227946 GN=XTPLMG728_2020 PE=4 SV=1	227946	5	4	4	3	2	5	A0A0K2ZX84		Xanthomonas translucens pv. poae				annotated		Bacteria; Proteobacteria; Gammaproteobacteria; Xanthomonadales; Xanthomonadaceae; Xanthomonas	343
75	3	tr|A0A067P7C4|A0A067P7C4_PLEOS	7	575	Uncharacterized protein OS=Pleurotus ostreatus PC15 OX=1137138 GN=PLEOSDRAFT_1081506 PE=4 SV=1	1137138	2	NA	2	10	26	10	A0A067P7C4		Pleurotus ostreatus PC15				annotated		Eukaryota; Fungi; Dikarya; Basidiomycota; Agaricomycotina; Agaricomycetes; Agaricomycetidae; Agaricales; Pleurotaceae; Pleurotus	5322
161	372	tr|A0A2Z4HGE4|A0A2Z4HGE4_9EUKA	4	1321	Photosystem I reaction center subunit IV OS=Cyanophora sudae OX=1522369 GN=psaE PE=3 SV=1	1522369	5	6	12	NA	2	NA	A0A2Z4HGE4		Cyanophora sudae			Cyanophora sp. TT-2014c; Cyanophora sudae Tos.Takah. & Nozaki	annotated	Species	Eukaryota; Glaucocystophyceae; Cyanophoraceae; Cyanophora	2761
24	379	tr|A0A346QR77|A0A346QR77_PROCL	8	264	Cytoplasmic actin 1 (Fragment) OS=Procambarus clarkii OX=6728 GN=Actb PE=2 SV=1	6728	NA	8	3	7	12	2	A0A346QR77	PROCL	Procambarus clarkii	Red swamp crayfish		Procambarus clarkia; Procambarus clarkii (Girard, 1852); Procumbarus clarkii	reviewed	Species	Eukaryota; Metazoa; Ecdysozoa; Arthropoda; Crustacea; Multicrustacea; Malacostraca; Eumalacostraca; Eucarida; Decapoda; Pleocyemata; Astacidea; Astacoidea; Cambaridae; Procambarus	6726
96	401	tr|A0A3G4ZVK3|A0A3G4ZVK3_9VIRU	7	726	Polyubiquitin OS=Edafosvirus sp. OX=2487765 GN=Edafosvirus51_4 PE=4 SV=1	2487765	2	NA	2	7	25	4	A0A3G4ZVK3	NA	NA	NA	NA	NA	NA	NA	NA	NA
178	176	tr|A0A2H5XBS4|A0A2H5XBS4_9BACT	7	1424	Immunogenic protein MPB70 OS=bacterium HR17 OX=2035412 GN=HRbin17_01147 PE=4 SV=1	2035412	8	2	4	NA	2	NA	A0A2H5XBS4	NA	NA	NA	NA	NA	NA	NA	NA	NA
204	94	tr|A0A1J5QWQ0|A0A1J5QWQ0_9ZZZZ	4	1668	Multiple sugar-binding periplasmic receptor ChvE OS=mine drainage metagenome OX=410659 GN=chvE_1 PE=4 SV=1	410659	NA	NA	3	5	6	5	A0A1J5QWQ0	NA	NA	NA	NA	NA	NA	NA	NA	NA
295	181	tr|A0A2P2CBG7|A0A2P2CBG7_9ZZZZ	2	2341	10kDa chaperonin OS=metagenome OX=256318 GN=groS PE=3 SV=1	256318	NA	NA	NA	4	6	NA	A0A2P2CBG7	NA	NA	NA	NA	NA	NA	NA	NA	NA
324	109	tr|A0A1S6PVI2|A0A1S6PVI2_9PHYC	2	2630	Major capsid protein OS=Prymnesium parvum DNA virus BW1 OX=1962447 PE=4 SV=1	1962447	NA	NA	NA	NA	4	3	A0A1S6PVI2	NA	NA	NA	NA	NA	NA	NA	NA	NA

## Sheet: Caucacus_Unique_groups_GO_annot
yourlist:M2021092292C7BAECDB1C5C413EE0E0348724B6821FE202L	Entry	Entry name	Status	Protein names	Gene names	Organism	Length	Gene ontology (biological process)	Temperature dependence
A0A2T1DKV5	A0A2T1DKV5	A0A2T1DKV5_9CYAN	unreviewed	Phycocyanin subunit alpha	cpcA C7B65_04090	Phormidesmis priestleyi ULC007	162	photosynthesis [GO:0015979]; protein-chromophore linkage [GO:0018298]
A0A2W7ANV7	A0A2W7ANV7	A0A2W7ANV7_9CYAN	unreviewed	60 kDa chaperonin (GroEL protein) (Protein Cpn60)	groL groEL DCF22_07780	Leptolyngbya sp.	545	protein refolding [GO:0042026]
A0A2T1DGA4	A0A2T1DGA4	A0A2T1DGA4_9CYAN	unreviewed	60 kDa chaperonin (GroEL protein) (Protein Cpn60)	groL groEL C7B65_11250	Phormidesmis priestleyi ULC007	546	protein refolding [GO:0042026]
A0A2T1DGA8	A0A2T1DGA8	A0A2T1DGA8_9CYAN	unreviewed	Fasciclin domain-containing protein	C7B65_11485	Phormidesmis priestleyi ULC007	133
A0A2T1DFX5	A0A2T1DFX5	A0A2T1DFX5_9CYAN	unreviewed	SLH domain-containing protein	C7B65_10825	Phormidesmis priestleyi ULC007	649	carbohydrate transport [GO:0008643]
A0A2T1DKV9	A0A2T1DKV9	A0A2T1DKV9_9CYAN	unreviewed	Phycocyanin subunit beta	C7B65_04085	Phormidesmis priestleyi ULC007	172	photosynthesis [GO:0015979]; protein-chromophore linkage [GO:0018298]
A0A2T1DD05	A0A2T1DD05	A0A2T1DD05_9CYAN	unreviewed	S-layer protein	C7B65_15860	Phormidesmis priestleyi ULC007	605	carbohydrate transport [GO:0008643]
A0A2T1GDY1	A0A2T1GDY1	A0A2T1GDY1_9CYAN	unreviewed	60 kDa chaperonin (GroEL protein) (Protein Cpn60)	groL groEL C7B77_14170	Chamaesiphon polymorphus CCALA 037	545	protein refolding [GO:0042026]
A0A2T1DG79	A0A2T1DG79	A0A2T1DG79_9CYAN	unreviewed	10 kDa chaperonin (GroES protein) (Protein Cpn10)	groS groES C7B65_11255	Phormidesmis priestleyi ULC007	103	protein folding [GO:0006457]
A0A2T1DLH9	A0A2T1DLH9	A0A2T1DLH9_9CYAN	unreviewed	Phosphate-binding protein	pstS C7B65_04380	Phormidesmis priestleyi ULC007	345	phosphate ion transmembrane transport [GO:0035435]
A0A0P4UKM5	A0A0P4UKM5	A0A0P4UKM5_9CYAN	unreviewed	Phycocyanin beta chain	NIES2104_19250	Leptolyngbya sp. NIES-2104	172	photosynthesis [GO:0015979]; protein-chromophore linkage [GO:0018298]
A0A2T1DL13	A0A2T1DL13	A0A2T1DL13_9CYAN	unreviewed	SLH domain-containing protein	C7B65_04375	Phormidesmis priestleyi ULC007	623	carbohydrate transport [GO:0008643]
A0A7G8W4X9	A0A7G8W4X9	A0A7G8W4X9_9BURK	unreviewed	Porin	H7F36_09650	Variovorax sp. PAMC28562	436	ion transport [GO:0006811]
A0A2T1DNN0	A0A2T1DNN0	A0A2T1DNN0_9CYAN	unreviewed	ATP synthase subunit beta (EC 7.1.2.2) (ATP synthase F1 sector subunit beta) (F-ATPase subunit beta)	atpD atpB C7B65_01425	Phormidesmis priestleyi ULC007	485
A0A2T1DJD4	A0A2T1DJD4	A0A2T1DJD4_9CYAN	unreviewed	60 kDa chaperonin (GroEL protein) (Protein Cpn60)	groL groEL C7B65_06615	Phormidesmis priestleyi ULC007	561	protein refolding [GO:0042026]
A0A2T1DTX6	A0A2T1DTX6	A0A2T1DTX6_9CYAN	unreviewed	ATP synthase subunit beta (EC 7.1.2.2) (ATP synthase F1 sector subunit beta) (F-ATPase subunit beta)	atpD atpB C7B69_14025	filamentous cyanobacterium Phorm 46	485
A0A2T1DM89	A0A2T1DM89	A0A2T1DM89_9CYAN	unreviewed	SLH domain-containing protein	C7B65_02800	Phormidesmis priestleyi ULC007	587	carbohydrate transport [GO:0008643]
A0A2T1D4W7	A0A2T1D4W7	A0A2T1D4W7_9CYAN	unreviewed	Alkaline phosphatase	C7B65_24155	Phormidesmis priestleyi ULC007	651
K9TBE4	K9TBE4	K9TBE4_9CYAN	unreviewed	Secreted/surface protein with fasciclin-like repeats	Ple7327_4652	Pleurocapsa sp. PCC 7327	133
K9RJ43	K9RJ43	K9RJ43_9CYAN	unreviewed	Secreted/surface protein with fasciclin-like repeats	Riv7116_5095	Rivularia sp. PCC 7116	133
A0A2T1E7R4	A0A2T1E7R4	A0A2T1E7R4_9CYAN	unreviewed	Porin	C7B69_09895	filamentous cyanobacterium Phorm 46	677	carbohydrate transport [GO:0008643]
A0A2T1DCE2	A0A2T1DCE2	A0A2T1DCE2_9CYAN	unreviewed	Porin	C7B65_16480	Phormidesmis priestleyi ULC007	581	carbohydrate transport [GO:0008643]
A0A2T1D8J6	A0A2T1D8J6	A0A2T1D8J6_9CYAN	unreviewed	AMIN domain-containing protein	C7B65_20405	Phormidesmis priestleyi ULC007	743	protein secretion [GO:0009306]
A0A346QR77	A0A346QR77	A0A346QR77_PROCL	unreviewed	Cytoplasmic actin 1 (Fragment)	Actb	Procambarus clarkii (Red swamp crayfish)	376
A0A0X8WW16	A0A0X8WW16	A0A0X8WW16_9CYAN	unreviewed	Allophycocyanin alpha chain	apcA O77CONTIG1_02541	Leptolyngbya sp. O-77	161	photosynthesis [GO:0015979]; protein-chromophore linkage [GO:0018298]
A0A5B8NLT6	A0A5B8NLT6	A0A5B8NLT6_9CHRO	unreviewed	60 kDa chaperonin (GroEL protein) (Protein Cpn60)	groL groEL FRE64_09890	Euhalothece natronophila Z-M001	540	protein refolding [GO:0042026]
A0A2T1D797	A0A2T1D797	A0A2T1D797_9CYAN	unreviewed	Chaperone protein DnaK (HSP70) (Heat shock 70 kDa protein) (Heat shock protein 70)	dnaK C7B65_21945	Phormidesmis priestleyi ULC007	638	protein folding [GO:0006457]
A0A1Y3LS94	A0A1Y3LS94	A0A1Y3LS94_9MICC	unreviewed	Cobalamin adenosyltransferase	B8W73_12030	Arthrobacter agilis	139
K9UJ19	K9UJ19	K9UJ19_CHAP6	unreviewed	Allophycocyanin alpha subunit apoprotein	Cha6605_3804	Chamaesiphon minutus (strain ATCC 27169 / PCC 6605)	161	photosynthesis [GO:0015979]; protein-chromophore linkage [GO:0018298]
A0A1Z4JFQ4	A0A1Z4JFQ4	A0A1Z4JFQ4_LEPBY	unreviewed	Carbohydrate-selective porin OprB	NIES2135_23850	Leptolyngbya boryana NIES-2135	616	carbohydrate transport [GO:0008643]
U7QGP0	U7QGP0	U7QGP0_9CYAN	unreviewed	Allophycocyanin, beta subunit	M595_2924	Lyngbya aestuarii BL J	161	photosynthesis [GO:0015979]; protein-chromophore linkage [GO:0018298]
A0A2T1DD61	A0A2T1DD61	A0A2T1DD61_9CYAN	unreviewed	Uncharacterized protein	C7B65_15320	Phormidesmis priestleyi ULC007	795
A0A2W6ZT46	A0A2W6ZT46	A0A2W6ZT46_9CYAN	unreviewed	ATP synthase subunit beta (EC 7.1.2.2) (ATP synthase F1 sector subunit beta) (F-ATPase subunit beta)	atpD atpB DCF22_23270	Leptolyngbya sp.	485
A0A2T1DMN4	A0A2T1DMN4	A0A2T1DMN4_9CYAN	unreviewed	ATP synthase subunit alpha (EC 7.1.2.2) (ATP synthase F1 sector subunit alpha) (F-ATPase subunit alpha)	atpA C7B65_03800	Phormidesmis priestleyi ULC007	505
A0A2T1D2X3	A0A2T1D2X3	A0A2T1D2X3_9CYAN	unreviewed	RNA-binding protein	C7B65_25800	Phormidesmis priestleyi ULC007	97
F5UCR3	F5UCR3	F5UCR3_9CYAN	unreviewed	ATP synthase subunit alpha (EC 7.1.2.2) (ATP synthase F1 sector subunit alpha) (F-ATPase subunit alpha)	atpA MicvaDRAFT_3945	Microcoleus vaginatus FGP-2	505
A0A2T1DBW2	A0A2T1DBW2	A0A2T1DBW2_9CYAN	unreviewed	DUF4331 domain-containing protein	C7B65_17070	Phormidesmis priestleyi ULC007	367
K9VTC0	K9VTC0	K9VTC0_9CYAN	unreviewed	ATPase AAA-2 domain protein	Cri9333_0177	Crinalium epipsammum PCC 9333	826
A0A2T1D3W8	A0A2T1D3W8	A0A2T1D3W8_9CYAN	unreviewed	Phosphodiesterase	C7B65_25075	Phormidesmis priestleyi ULC007	737
A0A2W4XH96	A0A2W4XH96	A0A2W4XH96_9CYAN	unreviewed	Fasciclin	DCF17_19075	Shackletoniella antarctica	133
A0A2T1E0P4	A0A2T1E0P4	A0A2T1E0P4_9CYAN	unreviewed	S-layer protein	C7B82_20145	Stenomitos frigidus ULC18	550	carbohydrate transport [GO:0008643]
A0A2T1DFB1	A0A2T1DFB1	A0A2T1DFB1_9CYAN	unreviewed	Fasciclin domain-containing protein	C7B65_12740	Phormidesmis priestleyi ULC007	138
E8WVD9	E8WVD9	E8WVD9_GRATM	unreviewed	60 kDa chaperonin (GroEL protein) (Protein Cpn60)	groL groEL AciX9_1325	Granulicella tundricola (strain ATCC BAA-1859 / DSM 23138 / MP5ACTX9)	557	protein refolding [GO:0042026]
A0A2Z3GQB7	A0A2Z3GQB7	A0A2Z3GQB7_9BACT	unreviewed	Uncharacterized protein	DDQ68_14520	Hymenobacter nivis	340
K9VEZ1	K9VEZ1	K9VEZ1_9CYAN	unreviewed	Cyanobacterial porin	Osc7112_1546	Oscillatoria nigro-viridis PCC 7112	690	carbohydrate transport [GO:0008643]
A0A5R9J9Q4	A0A5R9J9Q4	A0A5R9J9Q4_9PROT	unreviewed	60 kDa chaperonin (GroEL protein) (Protein Cpn60)	groL groEL FE263_03750	Lichenicoccus roseus	544	protein refolding [GO:0042026]
A0A2T1E4K7	A0A2T1E4K7	A0A2T1E4K7_9CYAN	unreviewed	Porin	C7B69_10520	filamentous cyanobacterium Phorm 46	716	carbohydrate transport [GO:0008643]
A0A2T1DKF9	A0A2T1DKF9	A0A2T1DKF9_9CYAN	unreviewed	Polyribonucleotide nucleotidyltransferase (EC 2.7.7.8) (Polynucleotide phosphorylase) (PNPase)	pnp C7B65_05915	Phormidesmis priestleyi ULC007	716	mRNA catabolic process [GO:0006402]; RNA processing [GO:0006396]
A0A2T1DLU9	A0A2T1DLU9	A0A2T1DLU9_9CYAN	unreviewed	Photosystem I 16 kDa polypeptide (Photosystem I reaction center subunit II)	C7B65_02270	Phormidesmis priestleyi ULC007	141	photosynthesis [GO:0015979]
A0A2G4F432	A0A2G4F432	A0A2G4F432_9CYAN	unreviewed	Chaperone protein DnaK (HSP70) (Heat shock 70 kDa protein) (Heat shock protein 70)	dnaK CP500_004655	Tychonema bourrellyi FEM_GT703	632	protein folding [GO:0006457]
A0A2W7AHJ1	A0A2W7AHJ1	A0A2W7AHJ1_9CYAN	unreviewed	S-layer protein	DCF22_07865	Leptolyngbya sp.	604	carbohydrate transport [GO:0008643]
A0A259MK25	A0A259MK25	A0A259MK25_9PROT	unreviewed	Fasciclin	B7X63_15405	Rhodospirillales bacterium 39-66-50	170
A0A2G4F274	A0A2G4F274	A0A2G4F274_9CYAN	unreviewed	Porin	CP500_008415	Tychonema bourrellyi FEM_GT703	711	carbohydrate transport [GO:0008643]
A0A2T1DFZ9	A0A2T1DFZ9	A0A2T1DFZ9_9CYAN	unreviewed	Insulinase family protein	C7B65_10900	Phormidesmis priestleyi ULC007	934
A0A2T1D5P1	A0A2T1D5P1	A0A2T1D5P1_9CYAN	unreviewed	HU family DNA-binding protein	C7B65_23695	Phormidesmis priestleyi ULC007	93
A0A2T1D6C1	A0A2T1D6C1	A0A2T1D6C1_9CYAN	unreviewed	UPF0367 protein C7B65_22880	C7B65_22880	Phormidesmis priestleyi ULC007	88
K9VWJ1	K9VWJ1	K9VWJ1_9CYAN	unreviewed	60 kDa chaperonin (GroEL protein) (Protein Cpn60)	groL groEL Cri9333_0942	Crinalium epipsammum PCC 9333	558	protein refolding [GO:0042026]
A0A2T1DGP8	A0A2T1DGP8	A0A2T1DGP8_9CYAN	unreviewed	RNA-binding protein	C7B65_10195	Phormidesmis priestleyi ULC007	103
A0A2W7AIS6	A0A2W7AIS6	A0A2W7AIS6_9CYAN	unreviewed	S-layer homology domain-containing protein	DCF22_08990	Leptolyngbya sp.	430
A0A2T1DYS7	A0A2T1DYS7	A0A2T1DYS7_9CYAN	unreviewed	Phosphate-binding protein	pstS C7B82_22285	Stenomitos frigidus ULC18	371	phosphate ion transmembrane transport [GO:0035435]
A0A2T1F559	A0A2T1F559	A0A2T1F559_9CYAN	unreviewed	Probable phosphoketolase (EC 4.1.2.-)	C7B69_00155	filamentous cyanobacterium Phorm 46	807	carbohydrate metabolic process [GO:0005975]
K9VXY4	K9VXY4	K9VXY4_9CYAN	unreviewed	ATP synthase subunit alpha (EC 7.1.2.2) (ATP synthase F1 sector subunit alpha) (F-ATPase subunit alpha)	atpA Cri9333_1945	Crinalium epipsammum PCC 9333	505
A0A2T1DYZ8	A0A2T1DYZ8	A0A2T1DYZ8_9CYAN	unreviewed	Carbon dioxide-concentrating mechanism protein CcmK	C7B69_12330	filamentous cyanobacterium Phorm 46	103	carbon fixation [GO:0015977]
A0A2W7B830	A0A2W7B830	A0A2W7B830_9CYAN	unreviewed	10 kDa chaperonin (GroES protein) (Protein Cpn10)	groS groES DCF22_07785	Leptolyngbya sp.	103	protein folding [GO:0006457]
A0A2T1DJS0	A0A2T1DJS0	A0A2T1DJS0_9CYAN	unreviewed	Uncharacterized protein	C7B65_06645	Phormidesmis priestleyi ULC007	1056
A0A1Z4SCH9	A0A1Z4SCH9	A0A1Z4SCH9_9NOSO	unreviewed	Chaperone protein DnaK (HSP70) (Heat shock 70 kDa protein) (Heat shock protein 70)	dnaK NIES4103_50900	Nostoc sp. NIES-4103	633	protein folding [GO:0006457]
A0A4Q3IYK0	A0A4Q3IYK0	A0A4Q3IYK0_9DELT	unreviewed	60 kDa chaperonin (GroEL protein) (Protein Cpn60)	groL groEL EOO74_03495	Myxococcales bacterium	543	protein refolding [GO:0042026]
A0A2W5XGX1	A0A2W5XGX1	A0A2W5XGX1_9BACT	unreviewed	60 kDa chaperonin (GroEL protein) (Protein Cpn60)	groL groEL DLM50_00950	Candidatus Eremiobacteraeota bacterium	556	protein refolding [GO:0042026]
A0A2W5Y101	A0A2W5Y101	A0A2W5Y101_9BACT	unreviewed	Cu_amine_oxidN1 domain-containing protein	DLM50_07705	Candidatus Eremiobacteraeota bacterium	454
A0A7G8VV73	A0A7G8VV73	A0A7G8VV73_9BURK	unreviewed	OmpA family protein	H7F36_12200	Variovorax sp. PAMC28562	217
K9UMB4	K9UMB4	K9UMB4_CHAP6	unreviewed	60 kDa chaperonin (GroEL protein) (Protein Cpn60)	groL groEL Cha6605_4860	Chamaesiphon minutus (strain ATCC 27169 / PCC 6605)	558	protein refolding [GO:0042026]
A0A4Q5QII1	A0A4Q5QII1	A0A4Q5QII1_9PROT	unreviewed	60 kDa chaperonin (Fragment)	groL EON55_21305	Alphaproteobacteria bacterium	395	protein refolding [GO:0042026]
A0A2W7B737	A0A2W7B737	A0A2W7B737_9CYAN	unreviewed	Polyribonucleotide nucleotidyltransferase (EC 2.7.7.8) (Polynucleotide phosphorylase) (PNPase)	pnp DCF22_08205	Leptolyngbya sp.	716	mRNA catabolic process [GO:0006402]; RNA processing [GO:0006396]
A0A067P7C4	A0A067P7C4	A0A067P7C4_PLEOS	unreviewed	Uncharacterized protein	PLEOSDRAFT_1081506	Pleurotus ostreatus PC15	214
A0A2G4EYE5	A0A2G4EYE5	A0A2G4EYE5_9CYAN	unreviewed	30S ribosomal protein S1	CP500_015965	Tychonema bourrellyi FEM_GT703	398
A0A5Q4HBV4	A0A5Q4HBV4	A0A5Q4HBV4_9CYAN	unreviewed	ATP synthase subunit beta (EC 7.1.2.2) (ATP synthase F1 sector subunit beta) (F-ATPase subunit beta)	atpD atpB EA414_04935	Arthrospira sp. PLM2.Bin9	485
A0A2T1DIU0	A0A2T1DIU0	A0A2T1DIU0_9CYAN	unreviewed	Uncharacterized protein	C7B65_07875	Phormidesmis priestleyi ULC007	194
A0A519Y155	A0A519Y155	A0A519Y155_9RHIZ	unreviewed	Porin (Fragment)	EOO66_14585	Methylobacterium sp.	465
A0A2T1DAM9	A0A2T1DAM9	A0A2T1DAM9_9CYAN	unreviewed	Urea ABC transporter substrate-binding protein	urtA C7B65_18455	Phormidesmis priestleyi ULC007	438	amino acid transport [GO:0006865]
A0A6L9XWW8	A0A6L9XWW8	A0A6L9XWW8_9MICO	unreviewed	Sugar ABC transporter substrate-binding protein	G3T36_06680	Diaminobutyricibacter tongyongensis	416
A0A2T1DA47	A0A2T1DA47	A0A2T1DA47_9CYAN	unreviewed	ATP-dependent Clp protease proteolytic subunit (EC 3.4.21.92) (Endopeptidase Clp)	clpP C7B65_18825	Phormidesmis priestleyi ULC007	227
A0A0P4UTS2	A0A0P4UTS2	A0A0P4UTS2_9CYAN	unreviewed	Uncharacterized protein	NIES2104_52680	Leptolyngbya sp. NIES-2104	330	photosynthesis, light reaction [GO:0019684]
A0A2G4EYB1	A0A2G4EYB1	A0A2G4EYB1_9CYAN	unreviewed	Ribulose bisphosphate carboxylase large chain (RuBisCO large subunit) (EC 4.1.1.39)	rbcL cbbL CP500_015700	Tychonema bourrellyi FEM_GT703	476	photorespiration [GO:0009853]; reductive pentose-phosphate cycle [GO:0019253]
A0A5C8UMK8	A0A5C8UMK8	A0A5C8UMK8_9MICO	unreviewed	Phosphoesterase	FVP33_13275	Lacisediminihabitans profunda	959	pathogenesis [GO:0009405]
A0A0P4UUI5	A0A0P4UUI5	A0A0P4UUI5_9CYAN	unreviewed	Urea ABC transporter, substrate binding protein UrtA	NIES2104_47500	Leptolyngbya sp. NIES-2104	439	amino acid transport [GO:0006865]
A0A2T1D6A6	A0A2T1D6A6	A0A2T1D6A6_9CYAN	unreviewed	Phycobiliprotein ApcE	C7B65_22910	Phormidesmis priestleyi ULC007	1135	photosynthesis [GO:0015979]; protein-chromophore linkage [GO:0018298]
A0A7C4C091	A0A7C4C091	A0A7C4C091_9BACT	unreviewed	60 kDa chaperonin (GroEL protein) (Protein Cpn60)	groL groEL ENS18_21325	Bryobacteraceae bacterium	542	protein refolding [GO:0042026]
A0A2T1DDD3	A0A2T1DDD3	A0A2T1DDD3_9CYAN	unreviewed	Superoxide dismutase (EC 1.15.1.1)	C7B65_15395	Phormidesmis priestleyi ULC007	199
A0A2T1DCX7	A0A2T1DCX7	A0A2T1DCX7_9CYAN	unreviewed	TolC family protein	C7B65_15565	Phormidesmis priestleyi ULC007	633
A0A2W7ALH8	A0A2W7ALH8	A0A2W7ALH8_9CYAN	unreviewed	30S ribosomal protein S1	DCF22_09250	Leptolyngbya sp.	365
A0A2T1FIY8	A0A2T1FIY8	A0A2T1FIY8_9CYAN	unreviewed	Polyribonucleotide nucleotidyltransferase (EC 2.7.7.8) (Polynucleotide phosphorylase) (PNPase)	pnp C7B67_21990	filamentous cyanobacterium Phorm 6	717	mRNA catabolic process [GO:0006402]; RNA processing [GO:0006396]
A0A2T1DC92	A0A2T1DC92	A0A2T1DC92_9CYAN	unreviewed	Cytochrome c-550 (Cytochrome c550) (Low-potential cytochrome c)	psbV C7B65_16530	Phormidesmis priestleyi ULC007	163	cytochrome c-heme linkage [GO:0018063]; photosynthesis, light reaction [GO:0019684]; respiratory electron transport chain [GO:0022904]
A0A2W7AZ37	A0A2W7AZ37	A0A2W7AZ37_9CYAN	unreviewed	60 kDa chaperonin (GroEL protein) (Protein Cpn60)	groL groEL DCF22_13120	Leptolyngbya sp.	559	protein refolding [GO:0042026]
A0A7G8VYV3	A0A7G8VYV3	A0A7G8VYV3_9BURK	unreviewed	Fasciclin domain-containing protein	H7F36_19635	Variovorax sp. PAMC28562	137
A0A3G4ZVK3	A0A3G4ZVK3	A0A3G4ZVK3_9VIRU	unreviewed	Polyubiquitin	Edafosvirus51_4	Edafosvirus sp.	159
A0A2T1DFJ5	A0A2T1DFJ5	A0A2T1DFJ5_9CYAN	unreviewed	CsbD family protein	C7B65_11635	Phormidesmis priestleyi ULC007	62
A0A4R8WTW5	A0A4R8WTW5	A0A4R8WTW5_9MICO	unreviewed	Fn3_like domain-containing protein	E3O35_02090	Cryobacterium sp. MDB2-A-2	1012	carbohydrate metabolic process [GO:0005975]
A0A2T1DHC9	A0A2T1DHC9	A0A2T1DHC9_9CYAN	unreviewed	Nucleoside diphosphate kinase (NDK) (NDP kinase) (EC 2.7.4.6) (Nucleoside-2-P kinase)	ndk C7B65_09380	Phormidesmis priestleyi ULC007	149	CTP biosynthetic process [GO:0006241]; GTP biosynthetic process [GO:0006183]; UTP biosynthetic process [GO:0006228]
A0A2T1DLX1	A0A2T1DLX1	A0A2T1DLX1_9CYAN	unreviewed	30S ribosomal protein S5	rpsE rps5 C7B65_02520	Phormidesmis priestleyi ULC007	174	translation [GO:0006412]
A0A2T1DLV5	A0A2T1DLV5	A0A2T1DLV5_9CYAN	unreviewed	50S ribosomal protein L5	rplE rpl5 C7B65_02540	Phormidesmis priestleyi ULC007	181	translation [GO:0006412]
A0A2T1DG34	A0A2T1DG34	A0A2T1DG34_9CYAN	unreviewed	ATP-dependent zinc metalloprotease FtsH (EC 3.4.24.-)	ftsH C7B65_11095	Phormidesmis priestleyi ULC007	612	protein catabolic process [GO:0030163]
A0A2T1D784	A0A2T1D784	A0A2T1D784_9CYAN	unreviewed	Bicarbonate-binding protein	C7B65_21905	Phormidesmis priestleyi ULC007	450	ion transport [GO:0006811]
A0A2T1DGR2	A0A2T1DGR2	A0A2T1DGR2_9CYAN	unreviewed	High light inducible protein	C7B65_10235	Phormidesmis priestleyi ULC007	67
A0A2G4EV59	A0A2G4EV59	A0A2G4EV59_9CYAN	unreviewed	Beta-Ig-H3/fasciclin	CP500_021865	Tychonema bourrellyi FEM_GT703	202
A0A2T1DC81	A0A2T1DC81	A0A2T1DC81_9CYAN	unreviewed	Rhodanese-like domain-containing protein	C7B65_16460	Phormidesmis priestleyi ULC007	160
A0A2T1D977	A0A2T1D977	A0A2T1D977_9CYAN	unreviewed	Uncharacterized protein	C7B65_19820	Phormidesmis priestleyi ULC007	1201
A0A0S3UE72	A0A0S3UE72	A0A0S3UE72_9CYAN	unreviewed	ABC transporter solute-binding protein	LEP3755_63070	Leptolyngbya sp. NIES-3755	370	cell adhesion [GO:0007155]; metal ion transport [GO:0030001]
A0A7G6Z4Y4	A0A7G6Z4Y4	A0A7G6Z4Y4_9MICO	unreviewed	Sugar ABC transporter substrate-binding protein	F1C58_01980	Glaciihabitans sp. INWT7	359
A0A2A2TPX3	A0A2A2TPX3	A0A2A2TPX3_9CYAN	unreviewed	Fasciclin	CK510_01420	Calothrix elsteri CCALA 953	133
A0A2T1DGZ9	A0A2T1DGZ9	A0A2T1DGZ9_9CYAN	unreviewed	Glyceraldehyde-3-phosphate dehydrogenase (EC 1.2.1.-)	gap C7B65_10620	Phormidesmis priestleyi ULC007	336	glucose metabolic process [GO:0006006]
A0A2W7AHE0	A0A2W7AHE0	A0A2W7AHE0_9CYAN	unreviewed	Elongation factor Tu (EF-Tu)	tuf DCF22_11565	Leptolyngbya sp.	409
A0A2T1DHK3	A0A2T1DHK3	A0A2T1DHK3_9CYAN	unreviewed	Red carotenoid-binding protein	C7B65_09880	Phormidesmis priestleyi ULC007	319	light absorption [GO:0016037]; protein-chromophore linkage [GO:0018298]
A0A6L9XTJ6	A0A6L9XTJ6	A0A6L9XTJ6_9MICO	unreviewed	Phosphoesterase	G3T36_01800	Diaminobutyricibacter tongyongensis	957	pathogenesis [GO:0009405]
A0A3M9ZAE5	A0A3M9ZAE5	A0A3M9ZAE5_9CYAN	unreviewed	Fructose-1,6-bisphosphate aldolase (FBP aldolase) (EC 4.1.2.13)	fba EDM05_07430	Leptolyngbya sp. IPPAS B-1204	359	glycolytic process [GO:0006096]
A0A426TSN7	A0A426TSN7	A0A426TSN7_9CHLR	unreviewed	60 kDa chaperonin (GroEL protein) (Protein Cpn60)	groL groEL EI684_19445	Candidatus Viridilinea halotolerans	549	protein refolding [GO:0042026]
E8X7I1	E8X7I1	E8X7I1_GRATM	unreviewed	Cna B domain protein	AciX9_4469	Granulicella tundricola (strain ATCC BAA-1859 / DSM 23138 / MP5ACTX9)	1146
A0A2T1DP56	A0A2T1DP56	A0A2T1DP56_9CYAN	unreviewed	30S ribosomal protein S7	rpsG rps7 C7B65_02045	Phormidesmis priestleyi ULC007	156	translation [GO:0006412]
A0A2T1D8Q9	A0A2T1D8Q9	A0A2T1D8Q9_9CYAN	unreviewed	DUF1565 domain-containing protein	C7B65_20390	Phormidesmis priestleyi ULC007	739
K9VVC5	K9VVC5	K9VVC5_9CYAN	unreviewed	Ferritin Dps family protein	Cri9333_0110	Crinalium epipsammum PCC 9333	179
A0A1I6MDK2	A0A1I6MDK2	A0A1I6MDK2_9BACT	unreviewed	TonB-dependent Receptor Plug Domain	SAMN05421771_2368	Granulicella pectinivorans	1194
A0A402CYT0	A0A402CYT0	A0A402CYT0_9BACT	unreviewed	SLH domain-containing protein	CCAX7_36180	Capsulimonas corticalis	663
A0A2T1D7J4	A0A2T1D7J4	A0A2T1D7J4_9CYAN	unreviewed	Peptidyl-prolyl cis-trans isomerase (EC 5.2.1.8)	C7B65_21625	Phormidesmis priestleyi ULC007	186
A0A2T1DFV2	A0A2T1DFV2	A0A2T1DFV2_9CYAN	unreviewed	DNA starvation/stationary phase protection protein	C7B65_12295	Phormidesmis priestleyi ULC007	181
A0A2W7A1A5	A0A2W7A1A5	A0A2W7A1A5_9CYAN	unreviewed	Chaperone protein DnaK (HSP70) (Heat shock 70 kDa protein) (Heat shock protein 70)	dnaK DCF22_19365	Leptolyngbya sp.	637	protein folding [GO:0006457]
A0A2T1D3X4	A0A2T1D3X4	A0A2T1D3X4_9CYAN	unreviewed	HU family DNA-binding protein	C7B65_24965	Phormidesmis priestleyi ULC007	94
K9VVF0	K9VVF0	K9VVF0_9CYAN	unreviewed	Fructose-1,6-bisphosphate aldolase (FBP aldolase) (EC 4.1.2.13)	Cri9333_1042	Crinalium epipsammum PCC 9333	357	glycolytic process [GO:0006096]
A0A3C1DZK8	A0A3C1DZK8	A0A3C1DZK8_9MICO	unreviewed	Phosphate-binding protein PstS	pstS DCP11_11080	Microbacteriaceae bacterium	363	phosphate ion transmembrane transport [GO:0035435]
A0A2T1DG40	A0A2T1DG40	A0A2T1DG40_9CYAN	unreviewed	Uncharacterized protein	C7B65_10845	Phormidesmis priestleyi ULC007	295
K9W1H0	K9W1H0	K9W1H0_9CYAN	unreviewed	RNP-1 like RNA-binding protein	Cri9333_2725	Crinalium epipsammum PCC 9333	111
A0A4R8WXY6	A0A4R8WXY6	A0A4R8WXY6_9MICO	unreviewed	Fn3_like domain-containing protein	E3O19_05365	Cryobacterium sp. MDT1-3	1005	carbohydrate metabolic process [GO:0005975]
A0A2T1D646	A0A2T1D646	A0A2T1D646_9CYAN	unreviewed	Photosystem II CP43 reaction center protein (PSII 43 kDa protein) (Protein CP-43)	psbC C7B65_23325	Phormidesmis priestleyi ULC007	461	photosynthetic electron transport in photosystem II [GO:0009772]; protein-chromophore linkage [GO:0018298]
A0A7G6Z4W2	A0A7G6Z4W2	A0A7G6Z4W2_9MICO	unreviewed	Sugar ABC transporter substrate-binding protein	F1C58_01855	Glaciihabitans sp. INWT7	368
A0A2T1EMH6	A0A2T1EMH6	A0A2T1EMH6_9CYAN	unreviewed	Bicarbonate-binding protein	C7B69_06370	filamentous cyanobacterium Phorm 46	466	ion transport [GO:0006811]
A0A2W7AT93	A0A2W7AT93	A0A2W7AT93_9CYAN	unreviewed	DNA-directed RNA polymerase subunit beta' (RNAP subunit beta') (EC 2.7.7.6) (RNA polymerase subunit beta') (Transcriptase subunit beta')	rpoC2 DCF22_02095	Leptolyngbya sp.	1338	transcription, DNA-templated [GO:0006351]
A0A2T1DLZ6	A0A2T1DLZ6	A0A2T1DLZ6_9CYAN	unreviewed	50S ribosomal protein L6	rplF rpl6 C7B65_02530	Phormidesmis priestleyi ULC007	182	translation [GO:0006412]
A0A2T1DEF8	A0A2T1DEF8	A0A2T1DEF8_9CYAN	unreviewed	Histidine kinase	C7B65_13930	Phormidesmis priestleyi ULC007	280
A0A0B0QTB3	A0A0B0QTB3	A0A0B0QTB3_APHF2	unreviewed	Carbon dioxide-concentrating protein CcmK	OA07_12830	Aphanizomenon flos-aquae (strain 2012/KM1/D3)	114	carbon fixation [GO:0015977]
A0A2T1DN44	A0A2T1DN44	A0A2T1DN44_9CYAN	unreviewed	PDZ domain-containing protein	C7B65_00145	Phormidesmis priestleyi ULC007	420
A0A1U7HZN4	A0A1U7HZN4	A0A1U7HZN4_9CHRO	unreviewed	Carbon dioxide-concentrating protein CcmK	NIES1031_00490	Chroogloeocystis siderophila 5.2 s.c.1	114	carbon fixation [GO:0015977]
A0A0R0MH59	A0A0R0MH59	A0A0R0MH59_9CYAN	unreviewed	XRE family transcriptional regulator	ASL19_05390	Cylindrospermopsis sp. CR12	242	phosphorelay signal transduction system [GO:0000160]; regulation of transcription, DNA-templated [GO:0006355]
A0A0K1PM48	A0A0K1PM48	A0A0K1PM48_9DELT	unreviewed	DNA-binding protein HU, putative	AKJ09_01261	Labilithrix luteola	104
E8WVB2	E8WVB2	E8WVB2_GRATM	unreviewed	Uncharacterized protein	AciX9_0213	Granulicella tundricola (strain ATCC BAA-1859 / DSM 23138 / MP5ACTX9)	1143
K9W095	K9W095	K9W095_9CYAN	unreviewed	DNA-directed RNA polymerase subunit alpha (RNAP subunit alpha) (EC 2.7.7.6) (RNA polymerase subunit alpha) (Transcriptase subunit alpha)	rpoA Cri9333_2293	Crinalium epipsammum PCC 9333	359	transcription, DNA-templated [GO:0006351]
A0A2T1DCQ2	A0A2T1DCQ2	A0A2T1DCQ2_9CYAN	unreviewed	DUF1565 domain-containing protein	C7B65_16270	Phormidesmis priestleyi ULC007	562
A0A2W7B6P4	A0A2W7B6P4	A0A2W7B6P4_9CYAN	unreviewed	ATP synthase subunit alpha (EC 7.1.2.2) (ATP synthase F1 sector subunit alpha) (F-ATPase subunit alpha)	atpA DCF22_02995	Leptolyngbya sp.	505
A0A2T1DLY1	A0A2T1DLY1	A0A2T1DLY1_9CYAN	unreviewed	30S ribosomal protein S3	rpsC rps3 C7B65_02570	Phormidesmis priestleyi ULC007	250	translation [GO:0006412]
A0A1M3PFE5	A0A1M3PFE5	A0A1M3PFE5_9PROT	unreviewed	Superoxide dismutase (EC 1.15.1.1)	BGP12_18950	Rhodospirillales bacterium 70-18	199
A0A4Q3TNL4	A0A4Q3TNL4	A0A4Q3TNL4_9BURK	unreviewed	Porin	EON92_03565	Burkholderiales bacterium	363	ion transmembrane transport [GO:0034220]
A0A2T1DG55	A0A2T1DG55	A0A2T1DG55_9CYAN	unreviewed	50S ribosomal protein L1	rplA rpl1 C7B65_10950	Phormidesmis priestleyi ULC007	237	regulation of translation [GO:0006417]; translation [GO:0006412]
A0A2T1DL37	A0A2T1DL37	A0A2T1DL37_9CYAN	unreviewed	Glutamine synthetase (EC 6.3.1.2)	glnA C7B65_04470	Phormidesmis priestleyi ULC007	475	glutamine biosynthetic process [GO:0006542]
A0A2T1DLZ3	A0A2T1DLZ3	A0A2T1DLZ3_9CYAN	unreviewed	50S ribosomal protein L2	rplB rpl2 C7B65_02585	Phormidesmis priestleyi ULC007	287	translation [GO:0006412]
A0A0K2ZX84	A0A0K2ZX84	A0A0K2ZX84_XANCT	unreviewed	FAS1 domain-containing protein	XTPLMG728_2020	Xanthomonas translucens pv. poae	196
A0A0B0QSG2	A0A0B0QSG2	A0A0B0QSG2_APHF2	unreviewed	DNA-directed RNA polymerase subunit gamma (RNAP subunit gamma) (EC 2.7.7.6) (RNA polymerase subunit gamma) (Transcriptase subunit gamma)	rpoC1 OA07_14660	Aphanizomenon flos-aquae (strain 2012/KM1/D3)	630	transcription, DNA-templated [GO:0006351]
A0A2E0L0L3	A0A2E0L0L3	A0A2E0L0L3_9CHLR	unreviewed	60 kDa chaperonin (GroEL protein) (Protein Cpn60)	groL groEL CL610_13385	Anaerolineaceae bacterium	546	protein refolding [GO:0042026]
A0A2T1DEW5	A0A2T1DEW5	A0A2T1DEW5_9CYAN	unreviewed	Glutathione S-transferase family protein	C7B65_13455	Phormidesmis priestleyi ULC007	261	glutathione metabolic process [GO:0006749]
A0A354V935	A0A354V935	A0A354V935_9PROT	unreviewed	Cold-shock protein	DDZ81_21905	Acetobacteraceae bacterium	68
A0A1I6A7Q2	A0A1I6A7Q2	A0A1I6A7Q2_9BACT	unreviewed	TonB-linked outer membrane protein, SusC/RagA family	SAMN04515668_3395	Siccationidurans arizonensis	1081
A0A1Z4JAD5	A0A1Z4JAD5	A0A1Z4JAD5_LEPBY	unreviewed	LuxR family transcriptional regulator	NIES2135_02020	Leptolyngbya boryana NIES-2135	216	phosphorelay signal transduction system [GO:0000160]; regulation of transcription, DNA-templated [GO:0006355]
A0A2T1EVB5	A0A2T1EVB5	A0A2T1EVB5_9CYAN	unreviewed	30S ribosomal protein S9	rpsI rps9 C7B69_04450	filamentous cyanobacterium Phorm 46	136	translation [GO:0006412]
A0A2Z4HGE4	A0A2Z4HGE4	A0A2Z4HGE4_9EUKA	unreviewed	Photosystem I reaction center subunit IV	psaE	Cyanophora sudae	69	photosynthesis [GO:0015979]
K9W094	K9W094	K9W094_9CYAN	unreviewed	Glyceraldehyde-3-phosphate dehydrogenase (EC 1.2.1.-)	Cri9333_2336	Crinalium epipsammum PCC 9333	361	glucose metabolic process [GO:0006006]
A0A2T1DAQ6	A0A2T1DAQ6	A0A2T1DAQ6_9CYAN	unreviewed	Carbon dioxide concentrating mechanism protein CcmL	C7B65_18050	Phormidesmis priestleyi ULC007	99
A0A094YRD2	A0A094YRD2	A0A094YRD2_9PROT	unreviewed	Membrane protein (Outer membrane protein A)	AD947_12720 AtDm6_1368 HC62_07565	Acetobacter tropicalis	378
A0A367PYT2	A0A367PYT2	A0A367PYT2_9NOSO	unreviewed	Nucleoside diphosphate kinase (NDK) (NDP kinase) (EC 2.7.4.6) (Nucleoside-2-P kinase)	ndk A6S26_31820	Nostoc sp. ATCC 43529	149	CTP biosynthetic process [GO:0006241]; GTP biosynthetic process [GO:0006183]; UTP biosynthetic process [GO:0006228]
A0A1Z4JKR1	A0A1Z4JKR1	A0A1Z4JKR1_LEPBY	unreviewed	Rhodanese domain-containing protein	NIES2135_41890	Leptolyngbya boryana NIES-2135	163
A0A2T1DLW4	A0A2T1DLW4	A0A2T1DLW4_9CYAN	unreviewed	50S ribosomal protein L23	rplW rpl23 C7B65_02590	Phormidesmis priestleyi ULC007	100	translation [GO:0006412]
A0A3E0W8F7	A0A3E0W8F7	A0A3E0W8F7_9MICO	unreviewed	Uncharacterized protein	B7R25_15685	Subtercola boreus	498
A0A2T1DL99	A0A2T1DL99	A0A2T1DL99_9CYAN	unreviewed	Allophycocyanin subunit beta	apcB C7B65_04475	Phormidesmis priestleyi ULC007	169	photosynthesis [GO:0015979]; protein-chromophore linkage [GO:0018298]
A0A0D8ZWM1	A0A0D8ZWM1	A0A0D8ZWM1_9CYAN	unreviewed	Membrane protein	UH38_11225	Aliterella atlantica CENA595	606	carbohydrate transport [GO:0008643]
A0A5B8VD51	A0A5B8VD51	A0A5B8VD51_9BACT	unreviewed	SusC/RagA family TonB-linked outer membrane protein	FRZ67_13130	Panacibacter ginsenosidivorans	992
A0A2T1DDJ6	A0A2T1DDJ6	A0A2T1DDJ6_9CYAN	unreviewed	DUF3769 domain-containing protein	C7B65_14635	Phormidesmis priestleyi ULC007	754
A0A4R8YKV2	A0A4R8YKV2	A0A4R8YKV2_9MICO	unreviewed	Glycerol kinase (EC 2.7.1.30) (ATP:glycerol 3-phosphotransferase) (Glycerokinase) (GK)	glpK E3O65_05000	Cryobacterium breve	504	glycerol-3-phosphate metabolic process [GO:0006072]; glycerol catabolic process [GO:0019563]
A0A1I6MZV6	A0A1I6MZV6	A0A1I6MZV6_9BACT	unreviewed	Cold-shock DNA-binding protein family	SAMN05421771_4053	Granulicella pectinivorans	66
K9VZI6	K9VZI6	K9VZI6_9CYAN	unreviewed	Photosystem I P700 chlorophyll a apoprotein A1 (EC 1.97.1.12) (PsaA)	psaA Cri9333_2082	Crinalium epipsammum PCC 9333	751	photosynthesis [GO:0015979]; protein-chromophore linkage [GO:0018298]
A0A2T1DCM7	A0A2T1DCM7	A0A2T1DCM7_9CYAN	unreviewed	Photosystem reaction center subunit H	C7B76_08510	filamentous cyanobacterium CCP2	324	photosynthesis, light reaction [GO:0019684]
A0A2T1DIK6	A0A2T1DIK6	A0A2T1DIK6_9CYAN	unreviewed	Cytochrome f	petA C7B65_07395	Phormidesmis priestleyi ULC007	328	photosynthesis [GO:0015979]
A0A2H5XBS4	A0A2H5XBS4	A0A2H5XBS4_9BACT	unreviewed	Immunogenic protein MPB70	HRbin17_01147	bacterium HR17	141
A0A2T1DFJ7	A0A2T1DFJ7	A0A2T1DFJ7_9CYAN	unreviewed	Phosphoglycerate kinase (EC 2.7.2.3)	pgk C7B65_11885	Phormidesmis priestleyi ULC007	400	glycolytic process [GO:0006096]
A0A402D103	A0A402D103	A0A402D103_9BACT	unreviewed	RNA-binding protein	CCAX7_43620	Capsulimonas corticalis	136
A0A2W7BHQ9	A0A2W7BHQ9	A0A2W7BHQ9_9CYAN	unreviewed	DNA-directed RNA polymerase subunit beta (RNAP subunit beta) (EC 2.7.7.6) (RNA polymerase subunit beta) (Transcriptase subunit beta)	rpoB DCF22_02105	Leptolyngbya sp.	1096	transcription, DNA-templated [GO:0006351]
A0A2Z3GHE9	A0A2Z3GHE9	A0A2Z3GHE9_9BACT	unreviewed	Por_Secre_tail domain-containing protein	DDQ68_01790	Hymenobacter nivis	1261
A0A218QJR2	A0A218QJR2	A0A218QJR2_9CYAN	unreviewed	Photosystem I reaction center subunit II	NIES4075_30040	Tolypothrix sp. NIES-4075	139	photosynthesis [GO:0015979]
A0A2T1D5T1	A0A2T1D5T1	A0A2T1D5T1_9CYAN	unreviewed	Transketolase (EC 2.2.1.1)	tkt C7B65_23510	Phormidesmis priestleyi ULC007	668
A0A0M4SHD6	A0A0M4SHD6	A0A0M4SHD6_9NOSO	unreviewed	Nucleoside diphosphate kinase (NDK) (NDP kinase) (EC 2.7.4.6) (Nucleoside-2-P kinase)	ndk ACX27_00075	Nostoc piscinale CENA21	149	CTP biosynthetic process [GO:0006241]; GTP biosynthetic process [GO:0006183]; UTP biosynthetic process [GO:0006228]
A0A2T1DFZ4	A0A2T1DFZ4	A0A2T1DFZ4_9CYAN	unreviewed	50S ribosomal protein L11	rplK rpl11 C7B65_10945	Phormidesmis priestleyi ULC007	141	translation [GO:0006412]
A0A2T1DHY8	A0A2T1DHY8	A0A2T1DHY8_9CYAN	unreviewed	Uncharacterized protein	C7B65_08525	Phormidesmis priestleyi ULC007	172
A0A2W7BFY6	A0A2W7BFY6	A0A2W7BFY6_9CYAN	unreviewed	Phycobiliprotein ApcE	DCF22_03035	Leptolyngbya sp.	1122	photosynthesis [GO:0015979]; protein-chromophore linkage [GO:0018298]
A0A2T1FQI5	A0A2T1FQI5	A0A2T1FQI5_9CYAN	unreviewed	DNA-directed RNA polymerase subunit beta' (RNAP subunit beta') (EC 2.7.7.6) (RNA polymerase subunit beta') (Transcriptase subunit beta')	rpoC2 C7B67_19290	filamentous cyanobacterium Phorm 6	1374	transcription, DNA-templated [GO:0006351]
A0A2T1DFN1	A0A2T1DFN1	A0A2T1DFN1_9CYAN	unreviewed	Chaperone protein ClpB	clpB C7B65_11815	Phormidesmis priestleyi ULC007	874	protein refolding [GO:0042026]; response to heat [GO:0009408]
A0A3D1AWC4	A0A3D1AWC4	A0A3D1AWC4_9BACT	unreviewed	TonB-dependent receptor	DEQ47_08750	Bryobacterales bacterium	972
A0A239CTP0	A0A239CTP0	A0A239CTP0_9BACT	unreviewed	Protein CcmA, bactofilin family	SAMN05421770_10197	Granulicella rosea	172
F5UP33	F5UP33	F5UP33_9CYAN	unreviewed	Photosystem II CP47 reaction center protein (PSII 47 kDa protein) (Protein CP-47)	psbB MicvaDRAFT_0310	Microcoleus vaginatus FGP-2	509	photosynthetic electron transport in photosystem II [GO:0009772]; protein-chromophore linkage [GO:0018298]
A0A2T1DL03	A0A2T1DL03	A0A2T1DL03_9CYAN	unreviewed	Photosystem I reaction center subunit XII	C7B65_04095	Phormidesmis priestleyi ULC007	286	photosynthesis [GO:0015979]
A0A2T1DMD6	A0A2T1DMD6	A0A2T1DMD6_9CYAN	unreviewed	30S ribosomal protein S18	rpsR rps18 C7B65_03515	Phormidesmis priestleyi ULC007	71	translation [GO:0006412]
A0A2T1D3J8	A0A2T1D3J8	A0A2T1D3J8_9CYAN	unreviewed	ATP-dependent Clp protease proteolytic subunit (EC 3.4.21.92) (Endopeptidase Clp)	clpP C7B65_25490	Phormidesmis priestleyi ULC007	230
A0A074TKP4	A0A074TKP4	A0A074TKP4_9RHOB	unreviewed	30S ribosomal protein S19	rpsS DL1_12890	Thioclava dalianensis	92	translation [GO:0006412]
A0A2W7BB34	A0A2W7BB34	A0A2W7BB34_9CYAN	unreviewed	Peroxiredoxin	DCF22_05850	Leptolyngbya sp.	211
A0A4Q5QNF4	A0A4Q5QNF4	A0A4Q5QNF4_9PROT	unreviewed	HU family DNA-binding protein	EON55_18265	Alphaproteobacteria bacterium	123
A0A2W4XW24	A0A2W4XW24	A0A2W4XW24_9CYAN	unreviewed	Uncharacterized protein	DCF19_15390	Pseudanabaena frigida	241
A0A1E4M6G6	A0A1E4M6G6	A0A1E4M6G6_9MICO	unreviewed	Cold-shock protein	ABT06_14890	Leifsonia sp. SCN 70-46	67
A0A2T1DK33	A0A2T1DK33	A0A2T1DK33_9CYAN	unreviewed	D-3-phosphoglycerate dehydrogenase (EC 1.1.1.95)	C7B65_05230	Phormidesmis priestleyi ULC007	526	L-serine biosynthetic process [GO:0006564]
A0A2Z3GJP7	A0A2Z3GJP7	A0A2Z3GJP7_9BACT	unreviewed	OmpA-like domain-containing protein	DDQ68_03400	Hymenobacter nivis	544	cell adhesion [GO:0007155]
A0A1J5QWQ0	A0A1J5QWQ0	A0A1J5QWQ0_9ZZZZ	unreviewed	Multiple sugar-binding periplasmic receptor ChvE	chvE_1 GALL_304430	mine drainage metagenome	367
K9W0X8	K9W0X8	K9W0X8_9CYAN	unreviewed	Urea-binding protein	Cri9333_2546	Crinalium epipsammum PCC 9333	434	amino acid transport [GO:0006865]
K9W5Y7	K9W5Y7	K9W5Y7_9CYAN	unreviewed	Rhodanese-like protein	Cri9333_4426	Crinalium epipsammum PCC 9333	178
A0A2T1DHF5	A0A2T1DHF5	A0A2T1DHF5_9CYAN	unreviewed	Universal stress protein	C7B65_09550	Phormidesmis priestleyi ULC007	281
A0A2T1DFM3	A0A2T1DFM3	A0A2T1DFM3_9CYAN	unreviewed	OstA-like family protein	C7B65_11860	Phormidesmis priestleyi ULC007	172
A0A0R2PU64	A0A0R2PU64	A0A0R2PU64_9ACTN	unreviewed	Cold-shock protein	ABR74_02715	Actinobacteria bacterium BACL4 MAG-121022-bin9	67
A0A2T1DF88	A0A2T1DF88	A0A2T1DF88_9CYAN	unreviewed	Elongation factor Ts (EF-Ts)	tsf C7B65_12635	Phormidesmis priestleyi ULC007	219
A0A2T1DKM2	A0A2T1DKM2	A0A2T1DKM2_9CYAN	unreviewed	Glycerophosphodiester phosphodiesterase	C7B65_05990	Phormidesmis priestleyi ULC007	796	lipid metabolic process [GO:0006629]
A0A2T1DKX0	A0A2T1DKX0	A0A2T1DKX0_9CYAN	unreviewed	Peptidase S41	C7B65_04190	Phormidesmis priestleyi ULC007	437
K9VY78	K9VY78	K9VY78_9CYAN	unreviewed	Enolase (EC 4.2.1.11) (2-phospho-D-glycerate hydro-lyase) (2-phosphoglycerate dehydratase)	eno Cri9333_2053	Crinalium epipsammum PCC 9333	426	glycolytic process [GO:0006096]
A0A7G8VZN1	A0A7G8VZN1	A0A7G8VZN1_9BURK	unreviewed	Phasin family protein	H7F36_21235	Variovorax sp. PAMC28562	183
A0A2T1D6L3	A0A2T1D6L3	A0A2T1D6L3_9CYAN	unreviewed	Zn-dependent hydrolase	C7B65_22635	Phormidesmis priestleyi ULC007	255
A0A2Z3GK84	A0A2Z3GK84	A0A2Z3GK84_9BACT	unreviewed	OMP_b-brl_2 domain-containing protein	DDQ68_18570	Hymenobacter nivis	223
A0A1U7J2T5	A0A1U7J2T5	A0A1U7J2T5_9CYAN	unreviewed	30S ribosomal protein S19	rpsS rps19 NIES30_17045	Phormidium tenue NIES-30	92	translation [GO:0006412]
A0A5Q2FDH3	A0A5Q2FDH3	A0A5Q2FDH3_9ACTN	unreviewed	Phosphoesterase	Rai3103_07110	Raineyella sp. CBA3103	975
K9W2I2	K9W2I2	K9W2I2_9CYAN	unreviewed	Anti-sigma factor antagonist	Cri9333_3134	Crinalium epipsammum PCC 9333	116
A0A2T1D781	A0A2T1D781	A0A2T1D781_9CYAN	unreviewed	6-phosphogluconate dehydrogenase, decarboxylating (EC 1.1.1.44)	C7B65_22025	Phormidesmis priestleyi ULC007	502	D-gluconate metabolic process [GO:0019521]; pentose-phosphate shunt [GO:0006098]
A0A126PDU0	A0A126PDU0	A0A126PDU0_9BACT	unreviewed	Uncharacterized protein	AXW84_13055	Hymenobacter sp. PAMC 26628	1061
A0A2T1DIB3	A0A2T1DIB3	A0A2T1DIB3_9CYAN	unreviewed	Thiamine biosynthesis protein	C7B65_08980	Phormidesmis priestleyi ULC007	335
A0A1V9F312	A0A1V9F312	A0A1V9F312_9BACT	unreviewed	Uncharacterized protein	A4H97_24135	Niastella yeongjuensis	1116
A0A2T1DLY2	A0A2T1DLY2	A0A2T1DLY2_9CYAN	unreviewed	50S ribosomal protein L15	rplO C7B65_02515	Phormidesmis priestleyi ULC007	158	translation [GO:0006412]
A0A2T1D614	A0A2T1D614	A0A2T1D614_9CYAN	unreviewed	N-acetylmuramoyl-L-alanine amidase	C7B65_23085	Phormidesmis priestleyi ULC007	638	peptidoglycan catabolic process [GO:0009253]
A0A2V1HPZ0	A0A2V1HPZ0	A0A2V1HPZ0_9MICO	unreviewed	30S ribosomal protein S1	DDQ50_11790	Amnibacterium flavum	495
K9VZS5	K9VZS5	K9VZS5_9CYAN	unreviewed	Cysteine synthase (EC 2.5.1.47)	Cri9333_1780	Crinalium epipsammum PCC 9333	319	cysteine biosynthetic process from serine [GO:0006535]
A0A428MJG2	A0A428MJG2	A0A428MJG2_9BACT	unreviewed	Carboxypeptidase family protein	EDE15_2476	Edaphobacter aggregans	1230
A0A1Z4QQK5	A0A1Z4QQK5	A0A1Z4QQK5_9NOST	unreviewed	30S ribosomal protein S5	rpsE rps5 NIES4074_50030	Cylindrospermum sp. NIES-4074	175	translation [GO:0006412]
A0A2T1DNJ3	A0A2T1DNJ3	A0A2T1DNJ3_9CYAN	unreviewed	Cupin domain-containing protein	C7B65_01075	Phormidesmis priestleyi ULC007	113
E8WYS0	E8WYS0	E8WYS0_GRATM	unreviewed	Phosphate-binding protein	AciX9_1708	Granulicella tundricola (strain ATCC BAA-1859 / DSM 23138 / MP5ACTX9)	335	phosphate ion transmembrane transport [GO:0035435]
A0A2T1DF81	A0A2T1DF81	A0A2T1DF81_9CYAN	unreviewed	Tetratricopeptide repeat protein	C7B65_12600	Phormidesmis priestleyi ULC007	487
A0A5J5IGS5	A0A5J5IGS5	A0A5J5IGS5_9BACT	unreviewed	SusC/RagA family TonB-linked outer membrane protein	FW778_15595	Ginsengibacter hankyongi	989
A0A2T1DMM9	A0A2T1DMM9	A0A2T1DMM9_9CYAN	unreviewed	Photosystem I reaction center subunit XI (PSI subunit V) (PSI-L)	psaL C7B65_03865	Phormidesmis priestleyi ULC007	174	photosynthesis [GO:0015979]
A0A239CSW9	A0A239CSW9	A0A239CSW9_9BACT	unreviewed	Outer membrane protein OmpA	SAMN05421770_10178	Granulicella rosea	518
A0A2T1DLZ5	A0A2T1DLZ5	A0A2T1DLZ5_9CYAN	unreviewed	50S ribosomal protein L3	rplC rpl3 C7B65_02600	Phormidesmis priestleyi ULC007	215	translation [GO:0006412]
A0A258H8D1	A0A258H8D1	A0A258H8D1_9SPHN	unreviewed	Nex18 symbiotically induced protein	B7Y97_00160	Sphingomonas sp. 32-66-10	141
K9UGN6	K9UGN6	K9UGN6_CHAP6	unreviewed	ATP-dependent Clp protease proteolytic subunit	Cha6605_2963	Chamaesiphon minutus (strain ATCC 27169 / PCC 6605)	223
A0A2T1DM10	A0A2T1DM10	A0A2T1DM10_9CYAN	unreviewed	50S ribosomal protein L29	rpmC rpl29 C7B65_02560	Phormidesmis priestleyi ULC007	70	translation [GO:0006412]
A0A651DZH8	A0A651DZH8	A0A651DZH8_9CYAN	unreviewed	Red carotenoid-binding protein	EA367_19480	Leptolyngbya sp. DLM2.Bin15	319	light absorption [GO:0016037]
A0A2Z3GLB4	A0A2Z3GLB4	A0A2Z3GLB4_9BACT	unreviewed	SusC/RagA family TonB-linked outer membrane protein	DDQ68_20900	Hymenobacter nivis	1089
A0A2T1DCX1	A0A2T1DCX1	A0A2T1DCX1_9CYAN	unreviewed	Probable phosphoketolase (EC 4.1.2.-)	C7B65_15685	Phormidesmis priestleyi ULC007	832	carbohydrate metabolic process [GO:0005975]
A0A4Z0PAC3	A0A4Z0PAC3	A0A4Z0PAC3_9BACT	unreviewed	SusC/RagA family TonB-linked outer membrane protein	EU556_01600	Hymenobacter sp. 92R-1	1147
A0A0T2KRR3	A0A0T2KRR3	A0A0T2KRR3_9MICO	unreviewed	ATP synthase subunit beta (EC 7.1.2.2) (ATP synthase F1 sector subunit beta) (F-ATPase subunit beta)	atpD ASD65_17890	Microbacterium sp. Root61	482
A0A2T1DB89	A0A2T1DB89	A0A2T1DB89_9CYAN	unreviewed	Nucleoid-associated protein C7B65_17660	C7B65_17660	Phormidesmis priestleyi ULC007	116
A0A2T1DGE7	A0A2T1DGE7	A0A2T1DGE7_9CYAN	unreviewed	GMP synthase [glutamine-hydrolyzing] (EC 6.3.5.2) (GMP synthetase) (Glutamine amidotransferase)	guaA C7B65_10875	Phormidesmis priestleyi ULC007	515	glutamine metabolic process [GO:0006541]
A0A5C8US59	A0A5C8US59	A0A5C8US59_9MICO	unreviewed	Uncharacterized protein	FVP33_05590	Lacisediminihabitans profunda	449
A0A2T1DFJ0	A0A2T1DFJ0	A0A2T1DFJ0_9CYAN	unreviewed	Uncharacterized protein	C7B65_11645	Phormidesmis priestleyi ULC007	174
A0A1H9GR64	A0A1H9GR64	A0A1H9GR64_9PSEU	unreviewed	Uncharacterized protein	SAMN04488000_103239	Lentzea albida	517
A0A0C2PMZ2	A0A0C2PMZ2	A0A0C2PMZ2_9CYAN	unreviewed	Peptidase S8	SD81_36100	Tolypothrix campylonemoides VB511288	632
A0A3D2J724	A0A3D2J724	A0A3D2J724_9CHLR	unreviewed	ATP synthase subunit alpha (EC 7.1.2.2) (ATP synthase F1 sector subunit alpha) (F-ATPase subunit alpha)	atpA DHW02_05495	Ktedonobacter sp.	546
A0A0D8ZX73	A0A0D8ZX73	A0A0D8ZX73_9CYAN	unreviewed	Phospholipid-binding protein	UH38_00850	Aliterella atlantica CENA595	114
A0A2W7B0C8	A0A2W7B0C8	A0A2W7B0C8_9CYAN	unreviewed	Urea ABC transporter substrate-binding protein	urtA DCF22_12255	Leptolyngbya sp.	437
A0A0X8P181	A0A0X8P181	A0A0X8P181_ALCXX	unreviewed	DNA-directed RNA polymerase subunit beta' (RNAP subunit beta') (EC 2.7.7.6) (RNA polymerase subunit beta') (Transcriptase subunit beta')	rpoC AL504_19460	Alcaligenes xylosoxydans xylosoxydans (Achromobacter xylosoxidans)	1414	transcription, DNA-templated [GO:0006351]
A0A402D124	A0A402D124	A0A402D124_9BACT	unreviewed	60 kDa chaperonin (GroEL protein) (Protein Cpn60)	groL groEL CCAX7_44080	Capsulimonas corticalis	548	protein refolding [GO:0042026]
A0A2T1D9K3	A0A2T1D9K3	A0A2T1D9K3_9CYAN	unreviewed	BMP family ABC transporter substrate-binding protein	C7B65_19635	Phormidesmis priestleyi ULC007	422
A0A519UCI1	A0A519UCI1	A0A519UCI1_9SPHI	unreviewed	SusC/RagA family protein (Fragment)	EOO94_04795	Pedobacter sp.	368
A0A1H0WUC7	A0A1H0WUC7	A0A1H0WUC7_9SPHI	unreviewed	OmpA-OmpF porin, OOP family	SAMN05428975_3912	Mucilaginibacter sp. OK268	458	ion transport [GO:0006811]
A0A5Q3HJG5	A0A5Q3HJG5	A0A5Q3HJG5_9BURK	unreviewed	Phasin family protein	F7R28_15960	Polaromonas sp. Pch-P	182
A0A7D6EQQ9	A0A7D6EQQ9	A0A7D6EQQ9_9ACTN	unreviewed	Sugar ABC transporter substrate-binding protein	DLE04_04710	Actinobacteria bacterium IMCC26103	356
A0A2T1DKN7	A0A2T1DKN7	A0A2T1DKN7_9CYAN	unreviewed	Uncharacterized protein	C7B65_05220	Phormidesmis priestleyi ULC007	164
A0A0X8WUT4	A0A0X8WUT4	A0A0X8WUT4_9CYAN	unreviewed	Uncharacterized protein	O77CONTIG1_02689	Leptolyngbya sp. O-77	117
A0A2T1DJK5	A0A2T1DJK5	A0A2T1DJK5_9CYAN	unreviewed	Aldo/keto reductase	C7B65_07210	Phormidesmis priestleyi ULC007	317	potassium ion transport [GO:0006813]; regulation of ion transmembrane transport [GO:0034765]
A0A5C8UUW4	A0A5C8UUW4	A0A5C8UUW4_9MICO	unreviewed	50S ribosomal protein L7/L12	rplL FVP33_02110	Lacisediminihabitans profunda	127	translation [GO:0006412]
A0A7G6ZBR4	A0A7G6ZBR4	A0A7G6ZBR4_9MICO	unreviewed	Xanthorhodopsin	F1C58_15585	Glaciihabitans sp. INWT7	272	phototransduction [GO:0007602]; protein-chromophore linkage [GO:0018298]
A0A1B7WNC1	A0A1B7WNC1	A0A1B7WNC1_9NOST	unreviewed	Translation initiation factor IF-1	infA AN487_06985	Anabaena sp. CRKS33	74
A0A2T1DLE8	A0A2T1DLE8	A0A2T1DLE8_9CYAN	unreviewed	Phycobilisome linker polypeptide	C7B65_04100	Phormidesmis priestleyi ULC007	89
A0A561HVT4	A0A561HVT4	A0A561HVT4_9SPHN	unreviewed	Iron complex outermembrane receptor protein	FHW33_10357	Novosphingobium barchaimii	796
A0A1G8SBC7	A0A1G8SBC7	A0A1G8SBC7_9ACTN	unreviewed	40-residue YVTN family beta-propeller repeat-containing protein	SAMN05444157_2538	Frankineae bacterium MT45	944	pathogenesis [GO:0009405]
A0A2T1DNF6	A0A2T1DNF6	A0A2T1DNF6_9CYAN	unreviewed	ATP-dependent zinc metalloprotease FtsH (EC 3.4.24.-)	ftsH C7B65_00610	Phormidesmis priestleyi ULC007	627	protein catabolic process [GO:0030163]
A0A1M5A620	A0A1M5A620	A0A1M5A620_9RHIZ	unreviewed	Inositol transport system substrate-binding protein	SAMN02745157_2026	Kaistia soli DSM 19436	318
A0A2T1FK22	A0A2T1FK22	A0A2T1FK22_9CYAN	unreviewed	50S ribosomal protein L4	rplD rpl4 C7B67_21540	filamentous cyanobacterium Phorm 6	210	translation [GO:0006412]
A0A1Q3QQP8	A0A1Q3QQP8	A0A1Q3QQP8_9BACT	unreviewed	Uncharacterized protein	BGO25_19250	Acidobacteriales bacterium 59-55	538
A0A2Z3GV62	A0A2Z3GV62	A0A2Z3GV62_9BACT	unreviewed	TonB-dependent receptor	DDQ68_20215	Hymenobacter nivis	1175
A0A2Z3GJ66	A0A2Z3GJ66	A0A2Z3GJ66_9BACT	unreviewed	SusC/RagA family protein	DDQ68_05530	Hymenobacter nivis	1007
A0A2T1D8C5	A0A2T1D8C5	A0A2T1D8C5_9CYAN	unreviewed	Histidinol dehydrogenase (HDH) (EC 1.1.1.23)	hisD C7B65_20580	Phormidesmis priestleyi ULC007	437	histidine biosynthetic process [GO:0000105]
A0A1X7DIP4	A0A1X7DIP4	A0A1X7DIP4_9ACTN	unreviewed	Elongation factor Tu (EF-Tu)	tuf SAMN02745830_01974	Streptomyces sp. Amel2xC10	397
A0A3R9NV48	A0A3R9NV48	A0A3R9NV48_9BACT	unreviewed	Superoxide dismutase (EC 1.15.1.1)	EDE15_3016	Edaphobacter aggregans	203
A0A0Q6W7P5	A0A0Q6W7P5	A0A0Q6W7P5_9BURK	unreviewed	Uncharacterized protein	ASC91_20200	Pelomonas sp. Root1237	510
A0A0Q6TVW7	A0A0Q6TVW7	A0A0Q6TVW7_9BURK	unreviewed	RNA-binding protein	ASC95_10405	Pelomonas sp. Root1217	181
L0DHM7	L0DHM7	L0DHM7_SINAD	unreviewed	RRM domain-containing RNA-binding protein	Sinac_3965	Singulisphaera acidiphila (strain ATCC BAA-1392 / DSM 18658 / VKM B-2454 / MOB10)	114
A0A7D4B8G3	A0A7D4B8G3	A0A7D4B8G3_9BACT	unreviewed	SusC/RagA family TonB-linked outer membrane protein	GKZ68_08090	Hymenobacter sp. BRD128	1014
A0A0C2MBX4	A0A0C2MBX4	A0A0C2MBX4_9CYAN	unreviewed	Bicarbonate-binding protein	SD80_06765	Scytonema tolypothrichoides VB-61278	456	ion transport [GO:0006811]
A0A2T1DME1	A0A2T1DME1	A0A2T1DME1_9CYAN	unreviewed	Tetratricopeptide repeat protein	C7B65_03470	Phormidesmis priestleyi ULC007	294
A0A0D6P902	A0A0D6P902	A0A0D6P902_9PROT	unreviewed	Oxidoreductase	Asru_0478_10	Acidisphaera rubrifaciens HS-AP3	339
A0A2T1DF44	A0A2T1DF44	A0A2T1DF44_9CYAN	unreviewed	Phosphoribulokinase (EC 2.7.1.19)	C7B65_12485	Phormidesmis priestleyi ULC007	333	carbohydrate metabolic process [GO:0005975]
A0A2T1D6P2	A0A2T1D6P2	A0A2T1D6P2_9CYAN	unreviewed	Uncharacterized protein	C7B65_22405	Phormidesmis priestleyi ULC007	232
A0A251WLK8	A0A251WLK8	A0A251WLK8_9CYAN	unreviewed	Transporter	B0A82_01660	Alkalinema sp. CACIAM 70d	155
A0A4R8VT96	A0A4R8VT96	A0A4R8VT96_9MICO	unreviewed	30S ribosomal protein S9	rpsI E3O44_07800	Cryobacterium sp. MDB2-B	161	translation [GO:0006412]
A0A411HHG1	A0A411HHG1	A0A411HHG1_9GAMM	unreviewed	OmpA family protein	ELE36_05375	Pseudolysobacter antarcticus	390	ion transport [GO:0006811]
A0A2T1DFI9	A0A2T1DFI9	A0A2T1DFI9_9CYAN	unreviewed	RNA-binding protein	C7B65_11950	Phormidesmis priestleyi ULC007	156
A0A5F0DKK9	A0A5F0DKK9	A0A5F0DKK9_9MICO	unreviewed	Ferritin-like domain-containing protein	E3O59_18905	Cryobacterium sp. MDB2-33-2	315
K9W058	K9W058	K9W058_9CYAN	unreviewed	50S ribosomal protein L15	rplO Cri9333_2300	Crinalium epipsammum PCC 9333	147	translation [GO:0006412]
A0A2T1D7A7	A0A2T1D7A7	A0A2T1D7A7_9CYAN	unreviewed	Peptidase_C39_2 domain-containing protein	C7B65_21795	Phormidesmis priestleyi ULC007	538
A0A2P2CBG7	A0A2P2CBG7	A0A2P2CBG7_9ZZZZ	unreviewed	10kDa chaperonin	groS NOCA2580018	metagenome	102	protein folding [GO:0006457]
A0A2T1EV35	A0A2T1EV35	A0A2T1EV35_9CYAN	unreviewed	DNA-directed RNA polymerase subunit alpha (RNAP subunit alpha) (EC 2.7.7.6) (RNA polymerase subunit alpha) (Transcriptase subunit alpha)	rpoA C7B69_04470	filamentous cyanobacterium Phorm 46	350	transcription, DNA-templated [GO:0006351]
A0A0K2LVT4	A0A0K2LVT4	A0A0K2LVT4_9NOST	unreviewed	Peptidyl-prolyl cis-trans isomerase (PPIase) (EC 5.2.1.8)	AA650_05135	Anabaena sp. WA102	260
A0A2T1D5Y9	A0A2T1D5Y9	A0A2T1D5Y9_9CYAN	unreviewed	Uncharacterized protein	C7B65_23040	Phormidesmis priestleyi ULC007	325
A0A6I2YM16	A0A6I2YM16	A0A6I2YM16_9ACTN	unreviewed	10 kDa chaperonin (GroES protein) (Protein Cpn10)	groS groES F2519_06100 F2687_05020 F2815_04370	Actinobacteria bacterium	98	protein folding [GO:0006457]
K9VXM5	K9VXM5	K9VXM5_9CYAN	unreviewed	Photosystem I reaction center subunit II	Cri9333_1826	Crinalium epipsammum PCC 9333	154	photosynthesis [GO:0015979]
A0A0U3SWK4	A0A0U3SWK4	A0A0U3SWK4_9BACT	unreviewed	SusC/RagA family TonB-linked outer membrane protein	AUC43_07310	Hymenobacter sedentarius	1069
A0A7G6ZCN3	A0A7G6ZCN3	A0A7G6ZCN3_9MICO	unreviewed	Adenylyl cyclase	F1C58_12045	Glaciihabitans sp. INWT7	609
A0A0N7Z3N3	A0A0N7Z3N3	A0A0N7Z3N3_9CYAN	unreviewed	Polyketide_cyc domain-containing protein	NIES2104_02930	Leptolyngbya sp. NIES-2104	235
A0A235IZ84	A0A235IZ84	A0A235IZ84_9NOSO	unreviewed	Uncharacterized protein	CDG79_19190	Nostoc sp. 'Peltigera membranacea cyanobiont' 232	179
A0A7G6Z7W3	A0A7G6Z7W3	A0A7G6Z7W3_9MICO	unreviewed	Superoxide dismutase (EC 1.15.1.1)	F1C58_07870	Glaciihabitans sp. INWT7	208
A0A126P6U4	A0A126P6U4	A0A126P6U4_9BACT	unreviewed	Uncharacterized protein	AXW84_04365	Hymenobacter sp. PAMC 26628	1165
A0A1I6XLN6	A0A1I6XLN6	A0A1I6XLN6_9GAMM	unreviewed	Uncaracterized surface protein containing fasciclin (FAS1) repeats	SAMN04487870_0256	Pseudoalteromonas sp. DSM 26666	166
A0A2T1DE63	A0A2T1DE63	A0A2T1DE63_9CYAN	unreviewed	Uncharacterized protein	C7B65_14370	Phormidesmis priestleyi ULC007	364
A0A2T1DNH6	A0A2T1DNH6	A0A2T1DNH6_9CYAN	unreviewed	TldD/PmbA family protein	C7B65_00900	Phormidesmis priestleyi ULC007	446
A0A2T1DKH7	A0A2T1DKH7	A0A2T1DKH7_9CYAN	unreviewed	Molybdopterin-synthase adenylyltransferase MoeB	C7B65_05880	Phormidesmis priestleyi ULC007	390
A0A5P9Q5T0	A0A5P9Q5T0	A0A5P9Q5T0_9MICO	unreviewed	Alpha-glucosides-binding periplasmic protein AglE	KDY119_00231	Luteimicrobium xylanilyticum	455
A0A2T1DKW8	A0A2T1DKW8	A0A2T1DKW8_9CYAN	unreviewed	Single-stranded DNA-binding protein	C7B65_04145	Phormidesmis priestleyi ULC007	159
A0A076HPL4	A0A076HPL4	A0A076HPL4_9BACT	unreviewed	Uncharacterized protein	N008_04050	Hymenobacter sp. APR13	1183
A0A2T1D9F0	A0A2T1D9F0	A0A2T1D9F0_9CYAN	unreviewed	Cell envelope biogenesis protein OmpA	C7B65_19815	Phormidesmis priestleyi ULC007	706
A0A126PGJ2	A0A126PGJ2	A0A126PGJ2_9BACT	unreviewed	SusC/RagA family TonB-linked outer membrane protein	AXW84_16125	Hymenobacter sp. PAMC 26628	1051
A0A2T1EP47	A0A2T1EP47	A0A2T1EP47_9CYAN	unreviewed	NTP_transf_9 domain-containing protein	C7B82_02990	Stenomitos frigidus ULC18	94
A0A5C8ULG1	A0A5C8ULG1	A0A5C8ULG1_9MICO	unreviewed	Flagellin	FVP33_13635	Lacisediminihabitans profunda	384	bacterial-type flagellum-dependent cell motility [GO:0071973]
A0A084EMW0	A0A084EMW0	A0A084EMW0_SPHYA	unreviewed	Outer membrane receptor for ferrienterochelin and colicins (TonB-dependent receptor)	BV87_03260 CP98_02215	Sphingobium yanoikuyae (Sphingomonas yanoikuyae)	991
A0A7G6ZAY5	A0A7G6ZAY5	A0A7G6ZAY5_9MICO	unreviewed	ABC transporter substrate-binding protein	F1C58_14010	Glaciihabitans sp. INWT7	423
A0A1H4K5K6	A0A1H4K5K6	A0A1H4K5K6_9BACT	unreviewed	Threonine dehydrogenase	SAMN05443244_1020	Terriglobus roseus	385
A0A1Z3HQM9	A0A1Z3HQM9	A0A1Z3HQM9_9CYAN	unreviewed	Phage shock protein A	XM38_035200	Halomicronema hongdechloris C2206	256
A0A2T1DAY7	A0A2T1DAY7	A0A2T1DAY7_9CYAN	unreviewed	Carbon dioxide concentrating mechanism protein CcmM (Carboxysome assembly protein CcmM)	C7B65_18055	Phormidesmis priestleyi ULC007	666
A0A2W5YQ75	A0A2W5YQ75	A0A2W5YQ75_9BACT	unreviewed	Uncharacterized protein	DLM50_05355	Candidatus Eremiobacteraeota bacterium	459
A0A1S6PVI2	A0A1S6PVI2	A0A1S6PVI2_9PHYC	unreviewed	Major capsid protein		Prymnesium parvum DNA virus BW1	525
A0A5C8UM10	A0A5C8UM10	A0A5C8UM10_9MICO	unreviewed	Carbohydrate ABC transporter, N-acetylglucosamine/diacetylchitobiose-binding protein	ngcE FVP33_13695	Lacisediminihabitans profunda	468
A0A086E115	A0A086E115	A0A086E115_9MICO	unreviewed	Membrane protein	JF66_04865	Cryobacterium sp. MLB-32	188
A0A2T1DIH2	A0A2T1DIH2	A0A2T1DIH2_9CYAN	unreviewed	Cytochrome b6-f complex iron-sulfur subunit (EC 7.1.1.6) (Plastohydroquinone:plastocyanin oxidoreductase iron-sulfur protein) (ISP) (RISP) (Rieske iron-sulfur protein)	petC C7B65_07400	Phormidesmis priestleyi ULC007	180	photosynthesis [GO:0015979]
A0A1Q6Y8N4	A0A1Q6Y8N4	A0A1Q6Y8N4_9CHLR	unreviewed	Dihydroxyacetone kinase subunit DhaK	AUH05_16755	Ktedonobacter sp. 13_2_20CM_53_11	333	glycerol metabolic process [GO:0006071]
A0A2W6DR51	A0A2W6DR51	A0A2W6DR51_9PSEU	unreviewed	Phosphodiesterase	DLM61_17400	Pseudonocardiales bacterium	550
A0A2W4P938	A0A2W4P938	A0A2W4P938_9PROT	unreviewed	Sugar ABC transporter	DIU65_05140	Proteobacteria bacterium	342
A0A2T1DG14	A0A2T1DG14	A0A2T1DG14_9CYAN	unreviewed	Uncharacterized protein	C7B65_10850	Phormidesmis priestleyi ULC007	167
A0A0X8WU20	A0A0X8WU20	A0A0X8WU20_9CYAN	unreviewed	30S ribosomal protein S8	rpsH rps8 O77CONTIG1_01997	Leptolyngbya sp. O-77	133	translation [GO:0006412]
A0A1F5V1H1	A0A1F5V1H1	A0A1F5V1H1_FRAXR	unreviewed	Chaperone protein DnaK (HSP70) (Heat shock 70 kDa protein) (Heat shock protein 70)	dnaK A2Z21_06555	Fraserbacteria sp. (strain RBG_16_55_9)	621	protein folding [GO:0006457]
A0A1Q4E8F9	A0A1Q4E8F9	A0A1Q4E8F9_9SPHN	unreviewed	DUF3597 domain-containing protein	BGP17_04715	Sphingomonas sp. 67-41	129
A0A502G4A7	A0A502G4A7	A0A502G4A7_9SPHN	unreviewed	TonB-dependent receptor	EAH76_02215	Sphingomonas glacialis	823
A0A5J5IIH8	A0A5J5IIH8	A0A5J5IIH8_9BACT	unreviewed	TonB-dependent receptor	FW778_01460	Ginsengibacter hankyongi	1107
A0A4R8VRM2	A0A4R8VRM2	A0A4R8VRM2_9MICO	unreviewed	Sugar ABC transporter substrate-binding protein	E3O44_08580	Cryobacterium sp. MDB2-B	363
A0A3S0FAN3	A0A3S0FAN3	A0A3S0FAN3_9SPHI	unreviewed	DUF4331 domain-containing protein	EKK37_13365	Sphingobacteriales bacterium	592
A0A4T2C9N3	A0A4T2C9N3	A0A4T2C9N3_9MICO	unreviewed	Integration host factor	D4765_00485	Subtercola vilae	95
A0A077JHA5	A0A077JHA5	A0A077JHA5_9CYAN	unreviewed	Nitrogen-responsive regulatory protein	ntcA ETSB_1868	cyanobacterium endosymbiont of Epithemia turgida isolate EtSB Lake Yunoko	225
K9SA05	K9SA05	K9SA05_9CYAN	unreviewed	Argininosuccinate synthase (EC 6.3.4.5) (Citrulline--aspartate ligase)	argG GEI7407_2510	Geitlerinema sp. PCC 7407	401	arginine biosynthetic process [GO:0006526]
A0A218Q6H0	A0A218Q6H0	A0A218Q6H0_9CYAN	unreviewed	Potassium-transporting ATPase ATP-binding subunit (EC 7.2.2.6) (ATP phosphohydrolase [potassium-transporting] B chain) (Potassium-binding and translocating subunit B) (Potassium-translocating ATPase B chain)	kdpB NIES3585_34980	Nodularia sp. NIES-3585	688
A0A2T1D8R8	A0A2T1D8R8	A0A2T1D8R8_9CYAN	unreviewed	Putative selenate ABC transporter substrate-binding protein	C7B65_20450	Phormidesmis priestleyi ULC007	305	transmembrane transport [GO:0055085]
A0A2T1DG78	A0A2T1DG78	A0A2T1DG78_9CYAN	unreviewed	Uncharacterized protein	C7B65_11370	Phormidesmis priestleyi ULC007	195
A0A1J1LRW1	A0A1J1LRW1	A0A1J1LRW1_9CYAN	unreviewed	UDP-glucuronate decarboxylase (EC 4.1.1.35)	PL9214650381	Planktothrix tepida PCC 9214	310	D-xylose metabolic process [GO:0042732]; UDP-D-xylose biosynthetic process [GO:0033320]
A0A4Q3MJI0	A0A4Q3MJI0	A0A4Q3MJI0_9BURK	unreviewed	Phosphate-binding protein PstS (Fragment)	pstS EOO26_13930	Comamonadaceae bacterium	282	phosphate ion transmembrane transport [GO:0035435]
A0A223NUL7	A0A223NUL7	A0A223NUL7_9SPHI	unreviewed	RagB/SusD family nutrient uptake outer membrane protein	MuYL_1661	Mucilaginibacter xinganensis	619
A0A2W5C5K0	A0A2W5C5K0	A0A2W5C5K0_9SPHN	unreviewed	TonB-dependent receptor	DI623_10095	Sphingomonas sanxanigenens	787
A0A4R8WG39	A0A4R8WG39	A0A4R8WG39_9MICO	unreviewed	Amino acid ABC transporter substrate-binding protein	E3O35_16945	Cryobacterium sp. MDB2-A-2	444
A0A2T1DAS5	A0A2T1DAS5	A0A2T1DAS5_9CYAN	unreviewed	Ribose-5-phosphate isomerase A (EC 5.3.1.6) (Phosphoriboisomerase A) (PRI)	rpiA C7B65_18090	Phormidesmis priestleyi ULC007	236	pentose-phosphate shunt, non-oxidative branch [GO:0009052]
A0A1Q8Z7N5	A0A1Q8Z7N5	A0A1Q8Z7N5_9CYAN	unreviewed	DNA-directed RNA polymerase subunit alpha (RNAP subunit alpha) (EC 2.7.7.6) (RNA polymerase subunit alpha) (Transcriptase subunit alpha)	rpoA BST81_21845	Leptolyngbya sp. 'hensonii'	315	transcription, DNA-templated [GO:0006351]
A0A7G6ZCP9	A0A7G6ZCP9	A0A7G6ZCP9_9MICO	unreviewed	S8/S53 family peptidase	F1C58_12795	Glaciihabitans sp. INWT7	635
A0A2T1DI12	A0A2T1DI12	A0A2T1DI12_9CYAN	unreviewed	Fe-S cluster assembly protein SufD	sufD C7B65_08415	Phormidesmis priestleyi ULC007	447	iron-sulfur cluster assembly [GO:0016226]
A0A3C0YB48	A0A3C0YB48	A0A3C0YB48_9BURK	unreviewed	Transporter	DCP03_17800	Polaromonas sp.	104
A0A519T900	A0A519T900	A0A519T900_9BACT	unreviewed	Ferritin-like domain-containing protein	EOO63_03900	Hymenobacter sp.	315
A0A1Q8Z933	A0A1Q8Z933	A0A1Q8Z933_9CYAN	unreviewed	Chaperone protein DnaK (HSP70) (Heat shock 70 kDa protein) (Heat shock protein 70)	dnaK BST81_18980	Leptolyngbya sp. 'hensonii'	629	protein folding [GO:0006457]
A0A552UAR5	A0A552UAR5	A0A552UAR5_9SPHN	unreviewed	TonB-dependent receptor	FMM06_13380	Sandarakinorhabdus sp. LB1R16	917
A0A2V8QGY6	A0A2V8QGY6	A0A2V8QGY6_9BACT	unreviewed	RNA-binding protein	DMF73_04180	Acidobacteria bacterium	135
A0A0Q5N3P9	A0A0Q5N3P9	A0A0Q5N3P9_9MICO	unreviewed	D-ribose ABC transporter substrate-binding protein	ASF89_12985	Frigoribacterium sp. Leaf172	330
A0A086DWB8	A0A086DWB8	A0A086DWB8_9MICO	unreviewed	Uncharacterized protein	JF66_16395	Cryobacterium sp. MLB-32	95
E8X3Q6	E8X3Q6	E8X3Q6_GRATM	unreviewed	TonB-dependent receptor plug	AciX9_2296	Granulicella tundricola (strain ATCC BAA-1859 / DSM 23138 / MP5ACTX9)	1175
A0A326UG67	A0A326UG67	A0A326UG67_9CHLR	unreviewed	10 kDa chaperonin (GroES protein) (Protein Cpn10)	groS groES EI42_00954	Thermosporothrix hazakensis	96	protein folding [GO:0006457]

## Sheet: Nov_Zemlya_Unique_GO_annot
Column1	Column2	Column3	Column4	Column5	Column6	Column7	Column8	Column9	Column10
yourlist:M2021092292C7BAECDB1C5C413EE0E0348724B6821FE34C0	Entry	Entry name	Status	Protein names	Gene names	Organism	Length	Gene ontology (biological process)	Temperature dependence
A0A2T1DKV5	A0A2T1DKV5	A0A2T1DKV5_9CYAN	unreviewed	Phycocyanin subunit alpha	cpcA C7B65_04090	Phormidesmis priestleyi ULC007	162	photosynthesis [GO:0015979]; protein-chromophore linkage [GO:0018298]
A0A2W7ANV7	A0A2W7ANV7	A0A2W7ANV7_9CYAN	unreviewed	60 kDa chaperonin (GroEL protein) (Protein Cpn60)	groL groEL DCF22_07780	Leptolyngbya sp.	545	protein refolding [GO:0042026]
A0A2T1DGA4	A0A2T1DGA4	A0A2T1DGA4_9CYAN	unreviewed	60 kDa chaperonin (GroEL protein) (Protein Cpn60)	groL groEL C7B65_11250	Phormidesmis priestleyi ULC007	546	protein refolding [GO:0042026]
A0A2T1DGA8	A0A2T1DGA8	A0A2T1DGA8_9CYAN	unreviewed	Fasciclin domain-containing protein	C7B65_11485	Phormidesmis priestleyi ULC007	133
A0A2T1DFX5	A0A2T1DFX5	A0A2T1DFX5_9CYAN	unreviewed	SLH domain-containing protein	C7B65_10825	Phormidesmis priestleyi ULC007	649	carbohydrate transport [GO:0008643]
A0A2T1DKV9	A0A2T1DKV9	A0A2T1DKV9_9CYAN	unreviewed	Phycocyanin subunit beta	C7B65_04085	Phormidesmis priestleyi ULC007	172	photosynthesis [GO:0015979]; protein-chromophore linkage [GO:0018298]
A0A2T1DD05	A0A2T1DD05	A0A2T1DD05_9CYAN	unreviewed	S-layer protein	C7B65_15860	Phormidesmis priestleyi ULC007	605	carbohydrate transport [GO:0008643]
A0A2T1GDY1	A0A2T1GDY1	A0A2T1GDY1_9CYAN	unreviewed	60 kDa chaperonin (GroEL protein) (Protein Cpn60)	groL groEL C7B77_14170	Chamaesiphon polymorphus CCALA 037	545	protein refolding [GO:0042026]
A0A2T1DG79	A0A2T1DG79	A0A2T1DG79_9CYAN	unreviewed	10 kDa chaperonin (GroES protein) (Protein Cpn10)	groS groES C7B65_11255	Phormidesmis priestleyi ULC007	103	protein folding [GO:0006457]
A0A0P4UKM5	A0A0P4UKM5	A0A0P4UKM5_9CYAN	unreviewed	Phycocyanin beta chain	NIES2104_19250	Leptolyngbya sp. NIES-2104	172	photosynthesis [GO:0015979]; protein-chromophore linkage [GO:0018298]
A0A2T1DL13	A0A2T1DL13	A0A2T1DL13_9CYAN	unreviewed	SLH domain-containing protein	C7B65_04375	Phormidesmis priestleyi ULC007	623	carbohydrate transport [GO:0008643]
A0A2T1DNN0	A0A2T1DNN0	A0A2T1DNN0_9CYAN	unreviewed	ATP synthase subunit beta (EC 7.1.2.2) (ATP synthase F1 sector subunit beta) (F-ATPase subunit beta)	atpD atpB C7B65_01425	Phormidesmis priestleyi ULC007	485
A0A2T1DJD4	A0A2T1DJD4	A0A2T1DJD4_9CYAN	unreviewed	60 kDa chaperonin (GroEL protein) (Protein Cpn60)	groL groEL C7B65_06615	Phormidesmis priestleyi ULC007	561	protein refolding [GO:0042026]
A0A2T1DTX6	A0A2T1DTX6	A0A2T1DTX6_9CYAN	unreviewed	ATP synthase subunit beta (EC 7.1.2.2) (ATP synthase F1 sector subunit beta) (F-ATPase subunit beta)	atpD atpB C7B69_14025	filamentous cyanobacterium Phorm 46	485
A0A2T1DM89	A0A2T1DM89	A0A2T1DM89_9CYAN	unreviewed	SLH domain-containing protein	C7B65_02800	Phormidesmis priestleyi ULC007	587	carbohydrate transport [GO:0008643]
K9TBE4	K9TBE4	K9TBE4_9CYAN	unreviewed	Secreted/surface protein with fasciclin-like repeats	Ple7327_4652	Pleurocapsa sp. PCC 7327	133
A0A2T1GIM2	A0A2T1GIM2	A0A2T1GIM2_9CYAN	unreviewed	Allophycocyanin subunit beta	apcB C7B77_07835	Chamaesiphon polymorphus CCALA 037	161	photosynthesis [GO:0015979]; protein-chromophore linkage [GO:0018298]
K9RJ43	K9RJ43	K9RJ43_9CYAN	unreviewed	Secreted/surface protein with fasciclin-like repeats	Riv7116_5095	Rivularia sp. PCC 7116	133
A0A2T1E7R4	A0A2T1E7R4	A0A2T1E7R4_9CYAN	unreviewed	Porin	C7B69_09895	filamentous cyanobacterium Phorm 46	677	carbohydrate transport [GO:0008643]
A0A2T1DCE2	A0A2T1DCE2	A0A2T1DCE2_9CYAN	unreviewed	Porin	C7B65_16480	Phormidesmis priestleyi ULC007	581	carbohydrate transport [GO:0008643]
A0A2T1D8J6	A0A2T1D8J6	A0A2T1D8J6_9CYAN	unreviewed	AMIN domain-containing protein	C7B65_20405	Phormidesmis priestleyi ULC007	743	protein secretion [GO:0009306]
A0A346QR77	A0A346QR77	A0A346QR77_PROCL	unreviewed	Cytoplasmic actin 1 (Fragment)	Actb	Procambarus clarkii (Red swamp crayfish)	376
A0A0X8WW16	A0A0X8WW16	A0A0X8WW16_9CYAN	unreviewed	Allophycocyanin alpha chain	apcA O77CONTIG1_02541	Leptolyngbya sp. O-77	161	photosynthesis [GO:0015979]; protein-chromophore linkage [GO:0018298]
A0A5B8NLT6	A0A5B8NLT6	A0A5B8NLT6_9CHRO	unreviewed	60 kDa chaperonin (GroEL protein) (Protein Cpn60)	groL groEL FRE64_09890	Euhalothece natronophila Z-M001	540	protein refolding [GO:0042026]
A0A2G4F282	A0A2G4F282	A0A2G4F282_9CYAN	unreviewed	Bleomycin hydrolase	CP500_008440	Tychonema bourrellyi FEM_GT703	184	photosynthesis [GO:0015979]; protein-chromophore linkage [GO:0018298]
A0A2W7ANT1	A0A2W7ANT1	A0A2W7ANT1_9CYAN	unreviewed	Allophycocyanin subunit beta	apcB DCF22_04280	Leptolyngbya sp.	161	photosynthesis [GO:0015979]; protein-chromophore linkage [GO:0018298]
A0A2T1D797	A0A2T1D797	A0A2T1D797_9CYAN	unreviewed	Chaperone protein DnaK (HSP70) (Heat shock 70 kDa protein) (Heat shock protein 70)	dnaK C7B65_21945	Phormidesmis priestleyi ULC007	638	protein folding [GO:0006457]
K9UJ19	K9UJ19	K9UJ19_CHAP6	unreviewed	Allophycocyanin alpha subunit apoprotein	Cha6605_3804	Chamaesiphon minutus (strain ATCC 27169 / PCC 6605)	161	photosynthesis [GO:0015979]; protein-chromophore linkage [GO:0018298]
A0A1Z4JFQ4	A0A1Z4JFQ4	A0A1Z4JFQ4_LEPBY	unreviewed	Carbohydrate-selective porin OprB	NIES2135_23850	Leptolyngbya boryana NIES-2135	616	carbohydrate transport [GO:0008643]
U7QGP0	U7QGP0	U7QGP0_9CYAN	unreviewed	Allophycocyanin, beta subunit	M595_2924	Lyngbya aestuarii BL J	161	photosynthesis [GO:0015979]; protein-chromophore linkage [GO:0018298]
A0A2T1DD61	A0A2T1DD61	A0A2T1DD61_9CYAN	unreviewed	Uncharacterized protein	C7B65_15320	Phormidesmis priestleyi ULC007	795
A0A1U7HV10	A0A1U7HV10	A0A1U7HV10_9CHRO	unreviewed	Phycocyanin subunit beta	NIES1031_09065	Chroogloeocystis siderophila 5.2 s.c.1	172	photosynthesis [GO:0015979]; protein-chromophore linkage [GO:0018298]
A0A2W6ZT46	A0A2W6ZT46	A0A2W6ZT46_9CYAN	unreviewed	ATP synthase subunit beta (EC 7.1.2.2) (ATP synthase F1 sector subunit beta) (F-ATPase subunit beta)	atpD atpB DCF22_23270	Leptolyngbya sp.	485
A0A2T1DMN4	A0A2T1DMN4	A0A2T1DMN4_9CYAN	unreviewed	ATP synthase subunit alpha (EC 7.1.2.2) (ATP synthase F1 sector subunit alpha) (F-ATPase subunit alpha)	atpA C7B65_03800	Phormidesmis priestleyi ULC007	505
A0A2P8QNZ6	A0A2P8QNZ6	A0A2P8QNZ6_9CYAN	unreviewed	Phycocyanin subunit beta	C7Y66_17135	Chroococcidiopsis sp. CCALA 051	172	photosynthesis [GO:0015979]; protein-chromophore linkage [GO:0018298]
A0A2T1D2X3	A0A2T1D2X3	A0A2T1D2X3_9CYAN	unreviewed	RNA-binding protein	C7B65_25800	Phormidesmis priestleyi ULC007	97
F5UCR3	F5UCR3	F5UCR3_9CYAN	unreviewed	ATP synthase subunit alpha (EC 7.1.2.2) (ATP synthase F1 sector subunit alpha) (F-ATPase subunit alpha)	atpA MicvaDRAFT_3945	Microcoleus vaginatus FGP-2	505
A0A2T1DBW2	A0A2T1DBW2	A0A2T1DBW2_9CYAN	unreviewed	DUF4331 domain-containing protein	C7B65_17070	Phormidesmis priestleyi ULC007	367
K9VTC0	K9VTC0	K9VTC0_9CYAN	unreviewed	ATPase AAA-2 domain protein	Cri9333_0177	Crinalium epipsammum PCC 9333	826
A0A2W4XH96	A0A2W4XH96	A0A2W4XH96_9CYAN	unreviewed	Fasciclin	DCF17_19075	Shackletoniella antarctica	133
A0A2T1E0P4	A0A2T1E0P4	A0A2T1E0P4_9CYAN	unreviewed	S-layer protein	C7B82_20145	Stenomitos frigidus ULC18	550	carbohydrate transport [GO:0008643]
E8WVD9	E8WVD9	E8WVD9_GRATM	unreviewed	60 kDa chaperonin (GroEL protein) (Protein Cpn60)	groL groEL AciX9_1325	Granulicella tundricola (strain ATCC BAA-1859 / DSM 23138 / MP5ACTX9)	557	protein refolding [GO:0042026]
K9VEZ1	K9VEZ1	K9VEZ1_9CYAN	unreviewed	Cyanobacterial porin	Osc7112_1546	Oscillatoria nigro-viridis PCC 7112	690	carbohydrate transport [GO:0008643]
A0A5R9J9Q4	A0A5R9J9Q4	A0A5R9J9Q4_9PROT	unreviewed	60 kDa chaperonin (GroEL protein) (Protein Cpn60)	groL groEL FE263_03750	Lichenicoccus roseus	544	protein refolding [GO:0042026]
A0A2T1E4K7	A0A2T1E4K7	A0A2T1E4K7_9CYAN	unreviewed	Porin	C7B69_10520	filamentous cyanobacterium Phorm 46	716	carbohydrate transport [GO:0008643]
A0A2T1DKF9	A0A2T1DKF9	A0A2T1DKF9_9CYAN	unreviewed	Polyribonucleotide nucleotidyltransferase (EC 2.7.7.8) (Polynucleotide phosphorylase) (PNPase)	pnp C7B65_05915	Phormidesmis priestleyi ULC007	716	mRNA catabolic process [GO:0006402]; RNA processing [GO:0006396]
A0A2T1DLU9	A0A2T1DLU9	A0A2T1DLU9_9CYAN	unreviewed	Photosystem I 16 kDa polypeptide (Photosystem I reaction center subunit II)	C7B65_02270	Phormidesmis priestleyi ULC007	141	photosynthesis [GO:0015979]
A0A2G4F432	A0A2G4F432	A0A2G4F432_9CYAN	unreviewed	Chaperone protein DnaK (HSP70) (Heat shock 70 kDa protein) (Heat shock protein 70)	dnaK CP500_004655	Tychonema bourrellyi FEM_GT703	632	protein folding [GO:0006457]
A0A2W7AHJ1	A0A2W7AHJ1	A0A2W7AHJ1_9CYAN	unreviewed	S-layer protein	DCF22_07865	Leptolyngbya sp.	604	carbohydrate transport [GO:0008643]
A0A259MK25	A0A259MK25	A0A259MK25_9PROT	unreviewed	Fasciclin	B7X63_15405	Rhodospirillales bacterium 39-66-50	170
A0A2G4F274	A0A2G4F274	A0A2G4F274_9CYAN	unreviewed	Porin	CP500_008415	Tychonema bourrellyi FEM_GT703	711	carbohydrate transport [GO:0008643]
A0A2T1D5P1	A0A2T1D5P1	A0A2T1D5P1_9CYAN	unreviewed	HU family DNA-binding protein	C7B65_23695	Phormidesmis priestleyi ULC007	93
K9VWJ1	K9VWJ1	K9VWJ1_9CYAN	unreviewed	60 kDa chaperonin (GroEL protein) (Protein Cpn60)	groL groEL Cri9333_0942	Crinalium epipsammum PCC 9333	558	protein refolding [GO:0042026]
A0A6N8FTJ0	A0A6N8FTJ0	A0A6N8FTJ0_9CHRO	unreviewed	Phycocyanin subunit alpha	BWI75_06850	Gloeocapsopsis sp. AAB1 = 1H9	162	photosynthesis [GO:0015979]; protein-chromophore linkage [GO:0018298]
A0A2T1DGP8	A0A2T1DGP8	A0A2T1DGP8_9CYAN	unreviewed	RNA-binding protein	C7B65_10195	Phormidesmis priestleyi ULC007	103
K9VXY4	K9VXY4	K9VXY4_9CYAN	unreviewed	ATP synthase subunit alpha (EC 7.1.2.2) (ATP synthase F1 sector subunit alpha) (F-ATPase subunit alpha)	atpA Cri9333_1945	Crinalium epipsammum PCC 9333	505
A0A2T1DYZ8	A0A2T1DYZ8	A0A2T1DYZ8_9CYAN	unreviewed	Carbon dioxide-concentrating mechanism protein CcmK	C7B69_12330	filamentous cyanobacterium Phorm 46	103	carbon fixation [GO:0015977]
A0A2W7B830	A0A2W7B830	A0A2W7B830_9CYAN	unreviewed	10 kDa chaperonin (GroES protein) (Protein Cpn10)	groS groES DCF22_07785	Leptolyngbya sp.	103	protein folding [GO:0006457]
A0A2T1DJS0	A0A2T1DJS0	A0A2T1DJS0_9CYAN	unreviewed	Uncharacterized protein	C7B65_06645	Phormidesmis priestleyi ULC007	1056
A0A1Z4SCH9	A0A1Z4SCH9	A0A1Z4SCH9_9NOSO	unreviewed	Chaperone protein DnaK (HSP70) (Heat shock 70 kDa protein) (Heat shock protein 70)	dnaK NIES4103_50900	Nostoc sp. NIES-4103	633	protein folding [GO:0006457]
A0A4Q3IYK0	A0A4Q3IYK0	A0A4Q3IYK0_9DELT	unreviewed	60 kDa chaperonin (GroEL protein) (Protein Cpn60)	groL groEL EOO74_03495	Myxococcales bacterium	543	protein refolding [GO:0042026]
A0A2T1F423	A0A2T1F423	A0A2T1F423_9CYAN	unreviewed	Red carotenoid-binding protein	C7B69_01700	filamentous cyanobacterium Phorm 46	320	light absorption [GO:0016037]; protein-chromophore linkage [GO:0018298]
A0A7G8VV73	A0A7G8VV73	A0A7G8VV73_9BURK	unreviewed	OmpA family protein	H7F36_12200	Variovorax sp. PAMC28562	217
A0A2T1E007	A0A2T1E007	A0A2T1E007_9CYAN	unreviewed	Bleomycin hydrolase	C7B69_12020	filamentous cyanobacterium Phorm 46	184	photosynthesis [GO:0015979]; protein-chromophore linkage [GO:0018298]
K9UMB4	K9UMB4	K9UMB4_CHAP6	unreviewed	60 kDa chaperonin (GroEL protein) (Protein Cpn60)	groL groEL Cha6605_4860	Chamaesiphon minutus (strain ATCC 27169 / PCC 6605)	558	protein refolding [GO:0042026]
A0A1Z4GAX3	A0A1Z4GAX3	A0A1Z4GAX3_9CYAN	unreviewed	Phycoerythrocyanin beta chain	pecB NIES21_04180	Anabaenopsis circularis NIES-21	172	photosynthesis [GO:0015979]; protein-chromophore linkage [GO:0018298]
A0A4Q5QII1	A0A4Q5QII1	A0A4Q5QII1_9PROT	unreviewed	60 kDa chaperonin (Fragment)	groL EON55_21305	Alphaproteobacteria bacterium	395	protein refolding [GO:0042026]
A0A2W7B737	A0A2W7B737	A0A2W7B737_9CYAN	unreviewed	Polyribonucleotide nucleotidyltransferase (EC 2.7.7.8) (Polynucleotide phosphorylase) (PNPase)	pnp DCF22_08205	Leptolyngbya sp.	716	mRNA catabolic process [GO:0006402]; RNA processing [GO:0006396]
A0A067P7C4	A0A067P7C4	A0A067P7C4_PLEOS	unreviewed	Uncharacterized protein	PLEOSDRAFT_1081506	Pleurotus ostreatus PC15	214
A0A2G4EYE5	A0A2G4EYE5	A0A2G4EYE5_9CYAN	unreviewed	30S ribosomal protein S1	CP500_015965	Tychonema bourrellyi FEM_GT703	398
A0A5Q4HBV4	A0A5Q4HBV4	A0A5Q4HBV4_9CYAN	unreviewed	ATP synthase subunit beta (EC 7.1.2.2) (ATP synthase F1 sector subunit beta) (F-ATPase subunit beta)	atpD atpB EA414_04935	Arthrospira sp. PLM2.Bin9	485
D7DYQ8	D7DYQ8	D7DYQ8_NOSA0	unreviewed	Phycocyanin	Aazo_0296	Nostoc azollae (strain 0708) (Anabaena azollae (strain 0708))	162	photosynthesis [GO:0015979]; protein-chromophore linkage [GO:0018298]
A0A2T1DAM9	A0A2T1DAM9	A0A2T1DAM9_9CYAN	unreviewed	Urea ABC transporter substrate-binding protein	urtA C7B65_18455	Phormidesmis priestleyi ULC007	438	amino acid transport [GO:0006865]
A0A2T1DA47	A0A2T1DA47	A0A2T1DA47_9CYAN	unreviewed	ATP-dependent Clp protease proteolytic subunit (EC 3.4.21.92) (Endopeptidase Clp)	clpP C7B65_18825	Phormidesmis priestleyi ULC007	227
A0A2G4EYB1	A0A2G4EYB1	A0A2G4EYB1_9CYAN	unreviewed	Ribulose bisphosphate carboxylase large chain (RuBisCO large subunit) (EC 4.1.1.39)	rbcL cbbL CP500_015700	Tychonema bourrellyi FEM_GT703	476	photorespiration [GO:0009853]; reductive pentose-phosphate cycle [GO:0019253]
A0A0P4UUI5	A0A0P4UUI5	A0A0P4UUI5_9CYAN	unreviewed	Urea ABC transporter, substrate binding protein UrtA	NIES2104_47500	Leptolyngbya sp. NIES-2104	439	amino acid transport [GO:0006865]
A0A2T1D6A6	A0A2T1D6A6	A0A2T1D6A6_9CYAN	unreviewed	Phycobiliprotein ApcE	C7B65_22910	Phormidesmis priestleyi ULC007	1135	photosynthesis [GO:0015979]; protein-chromophore linkage [GO:0018298]
A0A7C4C091	A0A7C4C091	A0A7C4C091_9BACT	unreviewed	60 kDa chaperonin (GroEL protein) (Protein Cpn60)	groL groEL ENS18_21325	Bryobacteraceae bacterium	542	protein refolding [GO:0042026]
A0A2T1DDD3	A0A2T1DDD3	A0A2T1DDD3_9CYAN	unreviewed	Superoxide dismutase (EC 1.15.1.1)	C7B65_15395	Phormidesmis priestleyi ULC007	199
yourlist:M20210922A084FC58F6BBA219896F365D15F2EB441FA88EF	Entry	Entry name	Status	Protein names	Gene names	Organism	Length	Gene ontology (biological process)	Temperature dependence
A0A2W7ALH8	A0A2W7ALH8	A0A2W7ALH8_9CYAN	unreviewed	30S ribosomal protein S1	DCF22_09250	Leptolyngbya sp.	365
A0A2T1FIY8	A0A2T1FIY8	A0A2T1FIY8_9CYAN	unreviewed	Polyribonucleotide nucleotidyltransferase (EC 2.7.7.8) (Polynucleotide phosphorylase) (PNPase)	pnp C7B67_21990	filamentous cyanobacterium Phorm 6	717	mRNA catabolic process [GO:0006402]; RNA processing [GO:0006396]
A0A2T1DC92	A0A2T1DC92	A0A2T1DC92_9CYAN	unreviewed	Cytochrome c-550 (Cytochrome c550) (Low-potential cytochrome c)	psbV C7B65_16530	Phormidesmis priestleyi ULC007	163	cytochrome c-heme linkage [GO:0018063]; photosynthesis, light reaction [GO:0019684]; respiratory electron transport chain [GO:0022904]
A0A2W7AZ37	A0A2W7AZ37	A0A2W7AZ37_9CYAN	unreviewed	60 kDa chaperonin (GroEL protein) (Protein Cpn60)	groL groEL DCF22_13120	Leptolyngbya sp.	559	protein refolding [GO:0042026]
A0A7G8VYV3	A0A7G8VYV3	A0A7G8VYV3_9BURK	unreviewed	Fasciclin domain-containing protein	H7F36_19635	Variovorax sp. PAMC28562	137
A0A3G4ZVK3	A0A3G4ZVK3	A0A3G4ZVK3_9VIRU	unreviewed	Polyubiquitin	Edafosvirus51_4	Edafosvirus sp.	159
A0A252DTU1	A0A252DTU1	A0A252DTU1_9NOSO	unreviewed	Phycocyanin subunit beta	BV378_02765	Nostoc sp. RF31YmG	172	photosynthesis [GO:0015979]; protein-chromophore linkage [GO:0018298]
A0A2T1DHC9	A0A2T1DHC9	A0A2T1DHC9_9CYAN	unreviewed	Nucleoside diphosphate kinase (NDK) (NDP kinase) (EC 2.7.4.6) (Nucleoside-2-P kinase)	ndk C7B65_09380	Phormidesmis priestleyi ULC007	149	CTP biosynthetic process [GO:0006241]; GTP biosynthetic process [GO:0006183]; UTP biosynthetic process [GO:0006228]
A0A2T1DLX1	A0A2T1DLX1	A0A2T1DLX1_9CYAN	unreviewed	30S ribosomal protein S5	rpsE rps5 C7B65_02520	Phormidesmis priestleyi ULC007	174	translation [GO:0006412]
A0A2T1DLV5	A0A2T1DLV5	A0A2T1DLV5_9CYAN	unreviewed	50S ribosomal protein L5	rplE rpl5 C7B65_02540	Phormidesmis priestleyi ULC007	181	translation [GO:0006412]
A0A2T1DG34	A0A2T1DG34	A0A2T1DG34_9CYAN	unreviewed	ATP-dependent zinc metalloprotease FtsH (EC 3.4.24.-)	ftsH C7B65_11095	Phormidesmis priestleyi ULC007	612	protein catabolic process [GO:0030163]
A0A2T1D784	A0A2T1D784	A0A2T1D784_9CYAN	unreviewed	Bicarbonate-binding protein	C7B65_21905	Phormidesmis priestleyi ULC007	450	ion transport [GO:0006811]
A0A2G4EV59	A0A2G4EV59	A0A2G4EV59_9CYAN	unreviewed	Beta-Ig-H3/fasciclin	CP500_021865	Tychonema bourrellyi FEM_GT703	202
A0A349JQJ6	A0A349JQJ6	A0A349JQJ6_9CYAN	unreviewed	Phycocyanin subunit beta	DCS91_23155	Microcoleaceae bacterium UBA11344	172	photosynthesis [GO:0015979]; protein-chromophore linkage [GO:0018298]
K9W3R6	K9W3R6	K9W3R6_9CYAN	unreviewed	Alkyl hydroperoxide reductase/ Thiol specific antioxidant/ Mal allergen	Cri9333_4046	Crinalium epipsammum PCC 9333	145
K9VY82	K9VY82	K9VY82_9CYAN	unreviewed	Microcompartments protein	Cri9333_1587	Crinalium epipsammum PCC 9333	102	carbon fixation [GO:0015977]
J9RBL9	J9RBL9	J9RBL9_ADIRI	unreviewed	Tubulin alpha chain (Fragment)		Adineta ricciae (Rotifer)	388	microtubule-based process [GO:0007017]
A0A2A2TPX3	A0A2A2TPX3	A0A2A2TPX3_9CYAN	unreviewed	Fasciclin	CK510_01420	Calothrix elsteri CCALA 953	133
A0A2T1DGZ9	A0A2T1DGZ9	A0A2T1DGZ9_9CYAN	unreviewed	Glyceraldehyde-3-phosphate dehydrogenase (EC 1.2.1.-)	gap C7B65_10620	Phormidesmis priestleyi ULC007	336	glucose metabolic process [GO:0006006]
A0A2W7AHE0	A0A2W7AHE0	A0A2W7AHE0_9CYAN	unreviewed	Elongation factor Tu (EF-Tu)	tuf DCF22_11565	Leptolyngbya sp.	409
A0A2T1DHK3	A0A2T1DHK3	A0A2T1DHK3_9CYAN	unreviewed	Red carotenoid-binding protein	C7B65_09880	Phormidesmis priestleyi ULC007	319	light absorption [GO:0016037]; protein-chromophore linkage [GO:0018298]
A0A3M9ZAE5	A0A3M9ZAE5	A0A3M9ZAE5_9CYAN	unreviewed	Fructose-1,6-bisphosphate aldolase (FBP aldolase) (EC 4.1.2.13)	fba EDM05_07430	Leptolyngbya sp. IPPAS B-1204	359	glycolytic process [GO:0006096]
A0A426TSN7	A0A426TSN7	A0A426TSN7_9CHLR	unreviewed	60 kDa chaperonin (GroEL protein) (Protein Cpn60)	groL groEL EI684_19445	Candidatus Viridilinea halotolerans	549	protein refolding [GO:0042026]
A0A2T1DP56	A0A2T1DP56	A0A2T1DP56_9CYAN	unreviewed	30S ribosomal protein S7	rpsG rps7 C7B65_02045	Phormidesmis priestleyi ULC007	156	translation [GO:0006412]
K9VXH7	K9VXH7	K9VXH7_9CYAN	unreviewed	Phycobiliprotein ApcE	Cri9333_1937	Crinalium epipsammum PCC 9333	1133	photosynthesis [GO:0015979]; protein-chromophore linkage [GO:0018298]
A0A2T1EVW3	A0A2T1EVW3	A0A2T1EVW3_9CYAN	unreviewed	Phycobilisome rod-core linker polypeptide CpcG	C7B69_04120	filamentous cyanobacterium Phorm 46	251	photosynthesis [GO:0015979]
K9VVC5	K9VVC5	K9VVC5_9CYAN	unreviewed	Ferritin Dps family protein	Cri9333_0110	Crinalium epipsammum PCC 9333	179
A0A2T1DSJ7	A0A2T1DSJ7	A0A2T1DSJ7_9CYAN	unreviewed	Fasciclin	C7B82_31090	Stenomitos frigidus ULC18	133
A0A2T1E003	A0A2T1E003	A0A2T1E003_9CYAN	unreviewed	Bleomycin hydrolase	C7B69_12025	filamentous cyanobacterium Phorm 46	164	photosynthesis [GO:0015979]; protein-chromophore linkage [GO:0018298]
A0A2T1DFV2	A0A2T1DFV2	A0A2T1DFV2_9CYAN	unreviewed	DNA starvation/stationary phase protection protein	C7B65_12295	Phormidesmis priestleyi ULC007	181
A0A2W7A1A5	A0A2W7A1A5	A0A2W7A1A5_9CYAN	unreviewed	Chaperone protein DnaK (HSP70) (Heat shock 70 kDa protein) (Heat shock protein 70)	dnaK DCF22_19365	Leptolyngbya sp.	637	protein folding [GO:0006457]
K9VVF0	K9VVF0	K9VVF0_9CYAN	unreviewed	Fructose-1,6-bisphosphate aldolase (FBP aldolase) (EC 4.1.2.13)	Cri9333_1042	Crinalium epipsammum PCC 9333	357	glycolytic process [GO:0006096]
A0A2T1DG40	A0A2T1DG40	A0A2T1DG40_9CYAN	unreviewed	Uncharacterized protein	C7B65_10845	Phormidesmis priestleyi ULC007	295
K9W1H0	K9W1H0	K9W1H0_9CYAN	unreviewed	RNP-1 like RNA-binding protein	Cri9333_2725	Crinalium epipsammum PCC 9333	111
A0A2T1D646	A0A2T1D646	A0A2T1D646_9CYAN	unreviewed	Photosystem II CP43 reaction center protein (PSII 43 kDa protein) (Protein CP-43)	psbC C7B65_23325	Phormidesmis priestleyi ULC007	461	photosynthetic electron transport in photosystem II [GO:0009772]; protein-chromophore linkage [GO:0018298]
A0A2T1EMH6	A0A2T1EMH6	A0A2T1EMH6_9CYAN	unreviewed	Bicarbonate-binding protein	C7B69_06370	filamentous cyanobacterium Phorm 46	466	ion transport [GO:0006811]
A0A2W7AT93	A0A2W7AT93	A0A2W7AT93_9CYAN	unreviewed	DNA-directed RNA polymerase subunit beta' (RNAP subunit beta') (EC 2.7.7.6) (RNA polymerase subunit beta') (Transcriptase subunit beta')	rpoC2 DCF22_02095	Leptolyngbya sp.	1338	transcription, DNA-templated [GO:0006351]
A0A2W6ZYW2	A0A2W6ZYW2	A0A2W6ZYW2_9CYAN	unreviewed	SLH domain-containing protein	DCF22_20830	Leptolyngbya sp.	558	carbohydrate transport [GO:0008643]
A0A0B0QTB3	A0A0B0QTB3	A0A0B0QTB3_APHF2	unreviewed	Carbon dioxide-concentrating protein CcmK	OA07_12830	Aphanizomenon flos-aquae (strain 2012/KM1/D3)	114	carbon fixation [GO:0015977]
A0A1U7HZN4	A0A1U7HZN4	A0A1U7HZN4_9CHRO	unreviewed	Carbon dioxide-concentrating protein CcmK	NIES1031_00490	Chroogloeocystis siderophila 5.2 s.c.1	114	carbon fixation [GO:0015977]
A0A0R0MH59	A0A0R0MH59	A0A0R0MH59_9CYAN	unreviewed	XRE family transcriptional regulator	ASL19_05390	Cylindrospermopsis sp. CR12	242	phosphorelay signal transduction system [GO:0000160]; regulation of transcription, DNA-templated [GO:0006355]
K9VXH0	K9VXH0	K9VXH0_9CYAN	unreviewed	10 kDa chaperonin (GroES protein) (Protein Cpn10)	groS groES Cri9333_1354	Crinalium epipsammum PCC 9333	103	protein folding [GO:0006457]
K9W095	K9W095	K9W095_9CYAN	unreviewed	DNA-directed RNA polymerase subunit alpha (RNAP subunit alpha) (EC 2.7.7.6) (RNA polymerase subunit alpha) (Transcriptase subunit alpha)	rpoA Cri9333_2293	Crinalium epipsammum PCC 9333	359	transcription, DNA-templated [GO:0006351]
A0A2W7B6P4	A0A2W7B6P4	A0A2W7B6P4_9CYAN	unreviewed	ATP synthase subunit alpha (EC 7.1.2.2) (ATP synthase F1 sector subunit alpha) (F-ATPase subunit alpha)	atpA DCF22_02995	Leptolyngbya sp.	505
A0A2N5JP95	A0A2N5JP95	A0A2N5JP95_9CYAN	unreviewed	Phycocyanin subunit alpha	cpcA CV045_08240	Cyanobacteria bacterium M5B4	162	photosynthesis [GO:0015979]; protein-chromophore linkage [GO:0018298]
A0A2T1DG55	A0A2T1DG55	A0A2T1DG55_9CYAN	unreviewed	50S ribosomal protein L1	rplA rpl1 C7B65_10950	Phormidesmis priestleyi ULC007	237	regulation of translation [GO:0006417]; translation [GO:0006412]
A0A2T1F3L8	A0A2T1F3L8	A0A2T1F3L8_9CYAN	unreviewed	Photosystem reaction center subunit H	C7B69_02235	filamentous cyanobacterium Phorm 46	285	photosynthesis, light reaction [GO:0019684]
A0A2G8KRV2	A0A2G8KRV2	A0A2G8KRV2_STIJA	unreviewed	Tubulin beta chain	BSL78_12375	Stichopus japonicus (Sea cucumber)	446	microtubule-based process [GO:0007017]
A0A2T1DL37	A0A2T1DL37	A0A2T1DL37_9CYAN	unreviewed	Glutamine synthetase (EC 6.3.1.2)	glnA C7B65_04470	Phormidesmis priestleyi ULC007	475	glutamine biosynthetic process [GO:0006542]
A0A2T1DLZ3	A0A2T1DLZ3	A0A2T1DLZ3_9CYAN	unreviewed	50S ribosomal protein L2	rplB rpl2 C7B65_02585	Phormidesmis priestleyi ULC007	287	translation [GO:0006412]
A0A0K2ZX84	A0A0K2ZX84	A0A0K2ZX84_XANCT	unreviewed	FAS1 domain-containing protein	XTPLMG728_2020	Xanthomonas translucens pv. poae	196
A0A0B0QSG2	A0A0B0QSG2	A0A0B0QSG2_APHF2	unreviewed	DNA-directed RNA polymerase subunit gamma (RNAP subunit gamma) (EC 2.7.7.6) (RNA polymerase subunit gamma) (Transcriptase subunit gamma)	rpoC1 OA07_14660	Aphanizomenon flos-aquae (strain 2012/KM1/D3)	630	transcription, DNA-templated [GO:0006351]
A0A2E0L0L3	A0A2E0L0L3	A0A2E0L0L3_9CHLR	unreviewed	60 kDa chaperonin (GroEL protein) (Protein Cpn60)	groL groEL CL610_13385	Anaerolineaceae bacterium	546	protein refolding [GO:0042026]
A0A0Q6R5S0	A0A0Q6R5S0	A0A0Q6R5S0_9MICO	unreviewed	Cold-shock protein	ASC54_08850	Yonghaparkia sp. Root332	67
A0A2T1DEW5	A0A2T1DEW5	A0A2T1DEW5_9CYAN	unreviewed	Glutathione S-transferase family protein	C7B65_13455	Phormidesmis priestleyi ULC007	261	glutathione metabolic process [GO:0006749]
A0A1Z4JAD5	A0A1Z4JAD5	A0A1Z4JAD5_LEPBY	unreviewed	LuxR family transcriptional regulator	NIES2135_02020	Leptolyngbya boryana NIES-2135	216	phosphorelay signal transduction system [GO:0000160]; regulation of transcription, DNA-templated [GO:0006355]
A0A2T1EVB5	A0A2T1EVB5	A0A2T1EVB5_9CYAN	unreviewed	30S ribosomal protein S9	rpsI rps9 C7B69_04450	filamentous cyanobacterium Phorm 46	136	translation [GO:0006412]
A0A2W7AQJ2	A0A2W7AQJ2	A0A2W7AQJ2_9CYAN	unreviewed	Uncharacterized protein	DCF22_02745	Leptolyngbya sp.	1044
A0A351LD54	A0A351LD54	A0A351LD54_9CYAN	unreviewed	Uncharacterized protein	DCZ55_30790	Cyanobacteria bacterium UBA11371	819
A0A522BGJ9	A0A522BGJ9	A0A522BGJ9_9ACTN	unreviewed	Cold-shock protein	EPN99_12420	Frankiales bacterium	67
A0A2W7AQM2	A0A2W7AQM2	A0A2W7AQM2_9CYAN	unreviewed	Porin	DCF22_02900	Leptolyngbya sp.	626	carbohydrate transport [GO:0008643]
K9W094	K9W094	K9W094_9CYAN	unreviewed	Glyceraldehyde-3-phosphate dehydrogenase (EC 1.2.1.-)	Cri9333_2336	Crinalium epipsammum PCC 9333	361	glucose metabolic process [GO:0006006]
A0A367PYT2	A0A367PYT2	A0A367PYT2_9NOSO	unreviewed	Nucleoside diphosphate kinase (NDK) (NDP kinase) (EC 2.7.4.6) (Nucleoside-2-P kinase)	ndk A6S26_31820	Nostoc sp. ATCC 43529	149	CTP biosynthetic process [GO:0006241]; GTP biosynthetic process [GO:0006183]; UTP biosynthetic process [GO:0006228]
A0A1Z4JKR1	A0A1Z4JKR1	A0A1Z4JKR1_LEPBY	unreviewed	Rhodanese domain-containing protein	NIES2135_41890	Leptolyngbya boryana NIES-2135	163
A0A2T1DL99	A0A2T1DL99	A0A2T1DL99_9CYAN	unreviewed	Allophycocyanin subunit beta	apcB C7B65_04475	Phormidesmis priestleyi ULC007	169	photosynthesis [GO:0015979]; protein-chromophore linkage [GO:0018298]
A0A2W7C488	A0A2W7C488	A0A2W7C488_9CYAN	unreviewed	DUF2267 domain-containing protein	DCF22_12360	Leptolyngbya sp.	192
A0A4R8YKV2	A0A4R8YKV2	A0A4R8YKV2_9MICO	unreviewed	Glycerol kinase (EC 2.7.1.30) (ATP:glycerol 3-phosphotransferase) (Glycerokinase) (GK)	glpK E3O65_05000	Cryobacterium breve	504	glycerol-3-phosphate metabolic process [GO:0006072]; glycerol catabolic process [GO:0019563]
A0A1U7HAQ7	A0A1U7HAQ7	A0A1U7HAQ7_9CHRO	unreviewed	ATP-dependent zinc metalloprotease FtsH (EC 3.4.24.-)	ftsH NIES1031_22875	Chroogloeocystis siderophila 5.2 s.c.1	623	cell division [GO:0051301]; protein catabolic process [GO:0030163]
K9VZI6	K9VZI6	K9VZI6_9CYAN	unreviewed	Photosystem I P700 chlorophyll a apoprotein A1 (EC 1.97.1.12) (PsaA)	psaA Cri9333_2082	Crinalium epipsammum PCC 9333	751	photosynthesis [GO:0015979]; protein-chromophore linkage [GO:0018298]
A0A2T1DCM7	A0A2T1DCM7	A0A2T1DCM7_9CYAN	unreviewed	Photosystem reaction center subunit H	C7B76_08510	filamentous cyanobacterium CCP2	324	photosynthesis, light reaction [GO:0019684]
K9W6E6	K9W6E6	K9W6E6_9CYAN	unreviewed	Uncharacterized protein	Cri9333_4552	Crinalium epipsammum PCC 9333	283
A0A2H5XBS4	A0A2H5XBS4	A0A2H5XBS4_9BACT	unreviewed	Immunogenic protein MPB70	HRbin17_01147	bacterium HR17	141
A0A2W7BHQ9	A0A2W7BHQ9	A0A2W7BHQ9_9CYAN	unreviewed	DNA-directed RNA polymerase subunit beta (RNAP subunit beta) (EC 2.7.7.6) (RNA polymerase subunit beta) (Transcriptase subunit beta)	rpoB DCF22_02105	Leptolyngbya sp.	1096	transcription, DNA-templated [GO:0006351]
A0A218QJR2	A0A218QJR2	A0A218QJR2_9CYAN	unreviewed	Photosystem I reaction center subunit II	NIES4075_30040	Tolypothrix sp. NIES-4075	139	photosynthesis [GO:0015979]
A0YYK0	A0YYK0	A0YYK0_LYNSP	unreviewed	10 kDa chaperonin (GroES protein) (Protein Cpn10)	groS groES L8106_08546	Lyngbya sp. (strain PCC 8106) (Lyngbya aestuarii (strain CCY9616))	103	protein folding [GO:0006457]
A0A0M4SHD6	A0A0M4SHD6	A0A0M4SHD6_9NOSO	unreviewed	Nucleoside diphosphate kinase (NDK) (NDP kinase) (EC 2.7.4.6) (Nucleoside-2-P kinase)	ndk ACX27_00075	Nostoc piscinale CENA21	149	CTP biosynthetic process [GO:0006241]; GTP biosynthetic process [GO:0006183]; UTP biosynthetic process [GO:0006228]
A0A2T1DHY8	A0A2T1DHY8	A0A2T1DHY8_9CYAN	unreviewed	Uncharacterized protein	C7B65_08525	Phormidesmis priestleyi ULC007	172
A0A2W7BFY6	A0A2W7BFY6	A0A2W7BFY6_9CYAN	unreviewed	Phycobiliprotein ApcE	DCF22_03035	Leptolyngbya sp.	1122	photosynthesis [GO:0015979]; protein-chromophore linkage [GO:0018298]
A0A2T1FQI5	A0A2T1FQI5	A0A2T1FQI5_9CYAN	unreviewed	DNA-directed RNA polymerase subunit beta' (RNAP subunit beta') (EC 2.7.7.6) (RNA polymerase subunit beta') (Transcriptase subunit beta')	rpoC2 C7B67_19290	filamentous cyanobacterium Phorm 6	1374	transcription, DNA-templated [GO:0006351]
A0A2T1DFN1	A0A2T1DFN1	A0A2T1DFN1_9CYAN	unreviewed	Chaperone protein ClpB	clpB C7B65_11815	Phormidesmis priestleyi ULC007	874	protein refolding [GO:0042026]; response to heat [GO:0009408]
yourlist:M2021092292C7BAECDB1C5C413EE0E0348724B6821FE37EH	Entry	Entry name	Status	Protein names	Gene names	Organism	Length	Gene ontology (biological process)	Temperature dependence
F5UP33	F5UP33	F5UP33_9CYAN	unreviewed	Photosystem II CP47 reaction center protein (PSII 47 kDa protein) (Protein CP-47)	psbB MicvaDRAFT_0310	Microcoleus vaginatus FGP-2	509	photosynthetic electron transport in photosystem II [GO:0009772]; protein-chromophore linkage [GO:0018298]
K9VXC7	K9VXC7	K9VXC7_9CYAN	unreviewed	Superoxide dismutase (EC 1.15.1.1)	Cri9333_1305	Crinalium epipsammum PCC 9333	198
A0A2T1DMD6	A0A2T1DMD6	A0A2T1DMD6_9CYAN	unreviewed	30S ribosomal protein S18	rpsR rps18 C7B65_03515	Phormidesmis priestleyi ULC007	71	translation [GO:0006412]
A0A2T1D3J8	A0A2T1D3J8	A0A2T1D3J8_9CYAN	unreviewed	ATP-dependent Clp protease proteolytic subunit (EC 3.4.21.92) (Endopeptidase Clp)	clpP C7B65_25490	Phormidesmis priestleyi ULC007	230
A0A2W7BB34	A0A2W7BB34	A0A2W7BB34_9CYAN	unreviewed	Peroxiredoxin	DCF22_05850	Leptolyngbya sp.	211
A0A2W4XW24	A0A2W4XW24	A0A2W4XW24_9CYAN	unreviewed	Uncharacterized protein	DCF19_15390	Pseudanabaena frigida	241
F5UK64	F5UK64	F5UK64_9CYAN	unreviewed	Uncharacterized protein	MicvaDRAFT_2491	Microcoleus vaginatus FGP-2	1043
A0A1E4M6G6	A0A1E4M6G6	A0A1E4M6G6_9MICO	unreviewed	Cold-shock protein	ABT06_14890	Leifsonia sp. SCN 70-46	67
A0A2T1DK33	A0A2T1DK33	A0A2T1DK33_9CYAN	unreviewed	D-3-phosphoglycerate dehydrogenase (EC 1.1.1.95)	C7B65_05230	Phormidesmis priestleyi ULC007	526	L-serine biosynthetic process [GO:0006564]
K9W2L9	K9W2L9	K9W2L9_9CYAN	unreviewed	17 kDa surface antigen	Cri9333_3169	Crinalium epipsammum PCC 9333	447
K9VSN3	K9VSN3	K9VSN3_9CYAN	unreviewed	Orange carotenoid-binding protein	Cri9333_0045	Crinalium epipsammum PCC 9333	319	light absorption [GO:0016037]; protein-chromophore linkage [GO:0018298]
K9W0X8	K9W0X8	K9W0X8_9CYAN	unreviewed	Urea-binding protein	Cri9333_2546	Crinalium epipsammum PCC 9333	434	amino acid transport [GO:0006865]
K9W5Y7	K9W5Y7	K9W5Y7_9CYAN	unreviewed	Rhodanese-like protein	Cri9333_4426	Crinalium epipsammum PCC 9333	178
A0A2T1DHF5	A0A2T1DHF5	A0A2T1DHF5_9CYAN	unreviewed	Universal stress protein	C7B65_09550	Phormidesmis priestleyi ULC007	281
K9VY78	K9VY78	K9VY78_9CYAN	unreviewed	Enolase (EC 4.2.1.11) (2-phospho-D-glycerate hydro-lyase) (2-phosphoglycerate dehydratase)	eno Cri9333_2053	Crinalium epipsammum PCC 9333	426	glycolytic process [GO:0006096]
A0A7G8VZN1	A0A7G8VZN1	A0A7G8VZN1_9BURK	unreviewed	Phasin family protein	H7F36_21235	Variovorax sp. PAMC28562	183
A0A1U7J2T5	A0A1U7J2T5	A0A1U7J2T5_9CYAN	unreviewed	30S ribosomal protein S19	rpsS rps19 NIES30_17045	Phormidium tenue NIES-30	92	translation [GO:0006412]
K9W2I2	K9W2I2	K9W2I2_9CYAN	unreviewed	Anti-sigma factor antagonist	Cri9333_3134	Crinalium epipsammum PCC 9333	116
A0A2T1DLY2	A0A2T1DLY2	A0A2T1DLY2_9CYAN	unreviewed	50S ribosomal protein L15	rplO C7B65_02515	Phormidesmis priestleyi ULC007	158	translation [GO:0006412]
A0A2V1HPZ0	A0A2V1HPZ0	A0A2V1HPZ0_9MICO	unreviewed	30S ribosomal protein S1	DDQ50_11790	Amnibacterium flavum	495
K9VZS5	K9VZS5	K9VZS5_9CYAN	unreviewed	Cysteine synthase (EC 2.5.1.47)	Cri9333_1780	Crinalium epipsammum PCC 9333	319	cysteine biosynthetic process from serine [GO:0006535]
A0A1Z4QQK5	A0A1Z4QQK5	A0A1Z4QQK5_9NOST	unreviewed	30S ribosomal protein S5	rpsE rps5 NIES4074_50030	Cylindrospermum sp. NIES-4074	175	translation [GO:0006412]
K9VXL9	K9VXL9	K9VXL9_9CYAN	unreviewed	D-3-phosphoglycerate dehydrogenase (EC 1.1.1.95)	Cri9333_1821	Crinalium epipsammum PCC 9333	526	L-serine biosynthetic process [GO:0006564]
A0A2T1FQR3	A0A2T1FQR3	A0A2T1FQR3_9CYAN	unreviewed	Carbohydrate porin (Fragment)	C7B77_24390	Chamaesiphon polymorphus CCALA 037	438	carbohydrate transport [GO:0008643]
A0A0D8ZX60	A0A0D8ZX60	A0A0D8ZX60_9CYAN	unreviewed	Phycocyanin	UH38_10430	Aliterella atlantica CENA595	174	photosynthesis [GO:0015979]; protein-chromophore linkage [GO:0018298]
A0A2T1DMM9	A0A2T1DMM9	A0A2T1DMM9_9CYAN	unreviewed	Photosystem I reaction center subunit XI (PSI subunit V) (PSI-L)	psaL C7B65_03865	Phormidesmis priestleyi ULC007	174	photosynthesis [GO:0015979]
K9UGN6	K9UGN6	K9UGN6_CHAP6	unreviewed	ATP-dependent Clp protease proteolytic subunit	Cha6605_2963	Chamaesiphon minutus (strain ATCC 27169 / PCC 6605)	223
A0A0K6HLZ5	A0A0K6HLZ5	A0A0K6HLZ5_9RHOB	unreviewed	Mannose-binding protein/fructose-binding protein/ribose-binding protein	Ga0061067_101124	Pannonibacter indicus	339
A0A651DZH8	A0A651DZH8	A0A651DZH8_9CYAN	unreviewed	Red carotenoid-binding protein	EA367_19480	Leptolyngbya sp. DLM2.Bin15	319	light absorption [GO:0016037]
A0A0T2KRR3	A0A0T2KRR3	A0A0T2KRR3_9MICO	unreviewed	ATP synthase subunit beta (EC 7.1.2.2) (ATP synthase F1 sector subunit beta) (F-ATPase subunit beta)	atpD ASD65_17890	Microbacterium sp. Root61	482
K9V9U7	K9V9U7	K9V9U7_9CYAN	unreviewed	Glutamine synthetase I beta	Cal6303_5132	Calothrix sp. PCC 6303	724	nitrogen compound metabolic process [GO:0006807]
A0A2T1DB89	A0A2T1DB89	A0A2T1DB89_9CYAN	unreviewed	Nucleoid-associated protein C7B65_17660	C7B65_17660	Phormidesmis priestleyi ULC007	116
A0A2T1DGE7	A0A2T1DGE7	A0A2T1DGE7_9CYAN	unreviewed	GMP synthase [glutamine-hydrolyzing] (EC 6.3.5.2) (GMP synthetase) (Glutamine amidotransferase)	guaA C7B65_10875	Phormidesmis priestleyi ULC007	515	glutamine metabolic process [GO:0006541]
A0A2T1DFJ0	A0A2T1DFJ0	A0A2T1DFJ0_9CYAN	unreviewed	Uncharacterized protein	C7B65_11645	Phormidesmis priestleyi ULC007	174
A0A1H9GR64	A0A1H9GR64	A0A1H9GR64_9PSEU	unreviewed	Uncharacterized protein	SAMN04488000_103239	Lentzea albida	517
A0A3D2J724	A0A3D2J724	A0A3D2J724_9CHLR	unreviewed	ATP synthase subunit alpha (EC 7.1.2.2) (ATP synthase F1 sector subunit alpha) (F-ATPase subunit alpha)	atpA DHW02_05495	Ktedonobacter sp.	546
A0A0D8ZX73	A0A0D8ZX73	A0A0D8ZX73_9CYAN	unreviewed	Phospholipid-binding protein	UH38_00850	Aliterella atlantica CENA595	114
A0A2W7AQM0	A0A2W7AQM0	A0A2W7AQM0_9CYAN	unreviewed	50S ribosomal protein L10	rplJ rpl10 DCF22_03230	Leptolyngbya sp.	177	ribosome biogenesis [GO:0042254]; translation [GO:0006412]
A0A1Z4JJX2	A0A1Z4JJX2	A0A1Z4JJX2_LEPBY	unreviewed	Phycobilisome linker polypeptide	NIES2135_39160	Leptolyngbya boryana NIES-2135	250	photosynthesis [GO:0015979]
A0A2W7B0C8	A0A2W7B0C8	A0A2W7B0C8_9CYAN	unreviewed	Urea ABC transporter substrate-binding protein	urtA DCF22_12255	Leptolyngbya sp.	437
A0A0X8P181	A0A0X8P181	A0A0X8P181_ALCXX	unreviewed	DNA-directed RNA polymerase subunit beta' (RNAP subunit beta') (EC 2.7.7.6) (RNA polymerase subunit beta') (Transcriptase subunit beta')	rpoC AL504_19460	Alcaligenes xylosoxydans xylosoxydans (Achromobacter xylosoxidans)	1414	transcription, DNA-templated [GO:0006351]
K9VY19	K9VY19	K9VY19_9CYAN	unreviewed	Translation initiation factor IF-2	infB Cri9333_1552	Crinalium epipsammum PCC 9333	1030
A0A2T1GA01	A0A2T1GA01	A0A2T1GA01_9CYAN	unreviewed	Uncharacterized protein	C7B77_19060	Chamaesiphon polymorphus CCALA 037	532	carbohydrate transport [GO:0008643]
A0A0G2HN27	A0A0G2HN27	A0A0G2HN27_9SYNE	unreviewed	Allophycocyanin	TE42_00285	Candidatus Synechococcus spongiarum SP3	161	photosynthesis [GO:0015979]; protein-chromophore linkage [GO:0018298]
A0A0M3V6N3	A0A0M3V6N3	A0A0M3V6N3_9NOSO	unreviewed	ATP synthase gamma chain (ATP synthase F1 sector gamma subunit) (F-ATPase gamma subunit)	atpG atpC ACX27_28850	Nostoc piscinale CENA21	315
A0A5Q3HJG5	A0A5Q3HJG5	A0A5Q3HJG5_9BURK	unreviewed	Phasin family protein	F7R28_15960	Polaromonas sp. Pch-P	182
A0A1Z4KC15	A0A1Z4KC15	A0A1Z4KC15_9CYAN	unreviewed	Peptidase S8/S53	NIES22_66650	Calothrix brevissima NIES-22	650
K9VMX0	K9VMX0	K9VMX0_9CYAN	unreviewed	Phosphoglucosamine mutase (EC 5.4.2.10)	Osc7112_4222	Oscillatoria nigro-viridis PCC 7112	477	carbohydrate metabolic process [GO:0005975]
A0A0X8WUT4	A0A0X8WUT4	A0A0X8WUT4_9CYAN	unreviewed	Uncharacterized protein	O77CONTIG1_02689	Leptolyngbya sp. O-77	117
A0A5C4N3F5	A0A5C4N3F5	A0A5C4N3F5_9RHOB	unreviewed	Carbohydrate ABC transporter substrate-binding protein	FHG66_03890	Rubellimicrobium rubrum	578
A0A2T1DR73	A0A2T1DR73	A0A2T1DR73_9CYAN	unreviewed	50S ribosomal subunit assembly factor BipA (EC 3.6.5.-) (GTP-binding protein BipA)	typA bipA C7B69_15160	filamentous cyanobacterium Phorm 46	596	ribosomal large subunit assembly [GO:0000027]
A0A5C8UUW4	A0A5C8UUW4	A0A5C8UUW4_9MICO	unreviewed	50S ribosomal protein L7/L12	rplL FVP33_02110	Lacisediminihabitans profunda	127	translation [GO:0006412]
A0A110AUW4	A0A110AUW4	A0A110AUW4_9CYAN	unreviewed	Coproporphyrin III ferrochelatase (EC 4.99.1.9)	O77CONTIG1_00536	Leptolyngbya sp. O-77	431	heme biosynthetic process [GO:0006783]
A0A6S8H488	A0A6S8H488	A0A6S8H488_DUNTE		Deleted.
A0A6M0ETC3	A0A6M0ETC3	A0A6M0ETC3_9CYAN	unreviewed	AbrB family transcriptional regulator	F6K16_13585	Symploca sp. SIO2B6	136
A0A1B7WNC1	A0A1B7WNC1	A0A1B7WNC1_9NOST	unreviewed	Translation initiation factor IF-1	infA AN487_06985	Anabaena sp. CRKS33	74
A0A2T1DNF6	A0A2T1DNF6	A0A2T1DNF6_9CYAN	unreviewed	ATP-dependent zinc metalloprotease FtsH (EC 3.4.24.-)	ftsH C7B65_00610	Phormidesmis priestleyi ULC007	627	protein catabolic process [GO:0030163]
K9VUT6	K9VUT6	K9VUT6_9CYAN	unreviewed	Orange carotenoid-binding protein	Cri9333_0797	Crinalium epipsammum PCC 9333	176	light absorption [GO:0016037]; protein-chromophore linkage [GO:0018298]
A0A2G4F618	A0A2G4F618	A0A2G4F618_9CYAN	unreviewed	50S ribosomal protein L15	rplO CP500_001730	Tychonema bourrellyi FEM_GT703	148	translation [GO:0006412]
A0A1M5A620	A0A1M5A620	A0A1M5A620_9RHIZ	unreviewed	Inositol transport system substrate-binding protein	SAMN02745157_2026	Kaistia soli DSM 19436	318
A0A0F6RNY4	A0A0F6RNY4	A0A0F6RNY4_MICAE	unreviewed	Phycocyanin beta chain	MYAER_4261	Microcystis aeruginosa NIES-2549	172	photosynthesis [GO:0015979]; protein-chromophore linkage [GO:0018298]
A0A6B3NQ99	A0A6B3NQ99	A0A6B3NQ99_9CYAN	unreviewed	Iron uptake porin	F6J89_28275	Symploca sp. SIO1C4	660	carbohydrate transport [GO:0008643]
A0A2T1FK22	A0A2T1FK22	A0A2T1FK22_9CYAN	unreviewed	50S ribosomal protein L4	rplD rpl4 C7B67_21540	filamentous cyanobacterium Phorm 6	210	translation [GO:0006412]
K9W0M2	K9W0M2	K9W0M2_9CYAN	unreviewed	Transcriptional regulator, AbrB family	Cri9333_2472	Crinalium epipsammum PCC 9333	139
A0A6I3DDT0	A0A6I3DDT0	A0A6I3DDT0_9ACTN	unreviewed	Fasciclin domain-containing protein	F2634_00725 F2736_01590 F2782_04370	Actinobacteria bacterium	179
K9W3S1	K9W3S1	K9W3S1_9CYAN	unreviewed	Photosystem II manganese-stabilizing polypeptide	Cri9333_3232	Crinalium epipsammum PCC 9333	277	photosystem II assembly [GO:0010207]; photosystem II stabilization [GO:0042549]
A0A2G4F675	A0A2G4F675	A0A2G4F675_9CYAN	unreviewed	Phycobiliprotein ApcE	CP500_002560	Tychonema bourrellyi FEM_GT703	922	photosynthesis [GO:0015979]; protein-chromophore linkage [GO:0018298]
A0A2T1DB53	A0A2T1DB53	A0A2T1DB53_9CYAN	unreviewed	Type 1 glutamine amidotransferase	C7B69_17185	filamentous cyanobacterium Phorm 46	365	glutamine metabolic process [GO:0006541]
A0A2T1D8C5	A0A2T1D8C5	A0A2T1D8C5_9CYAN	unreviewed	Histidinol dehydrogenase (HDH) (EC 1.1.1.23)	hisD C7B65_20580	Phormidesmis priestleyi ULC007	437	histidine biosynthetic process [GO:0000105]
K9VXV3	K9VXV3	K9VXV3_9CYAN	unreviewed	Adenosylhomocysteinase (EC 3.3.1.1) (S-adenosyl-L-homocysteine hydrolase) (AdoHcyase)	ahcY Cri9333_1067	Crinalium epipsammum PCC 9333	425	one-carbon metabolic process [GO:0006730]
A0A1X7DIP4	A0A1X7DIP4	A0A1X7DIP4_9ACTN	unreviewed	Elongation factor Tu (EF-Tu)	tuf SAMN02745830_01974	Streptomyces sp. Amel2xC10	397
A0A2W7AB70	A0A2W7AB70	A0A2W7AB70_9CYAN	unreviewed	Uncharacterized protein	DCF22_14250	Leptolyngbya sp.	198
A0A2W7AMN4	A0A2W7AMN4	A0A2W7AMN4_9CYAN	unreviewed	Uncharacterized protein	DCF22_05270	Leptolyngbya sp.	294
A0A0Q6W7P5	A0A0Q6W7P5	A0A0Q6W7P5_9BURK	unreviewed	Uncharacterized protein	ASC91_20200	Pelomonas sp. Root1237	510
A0A2T1FWQ2	A0A2T1FWQ2	A0A2T1FWQ2_9CYAN	unreviewed	Uncharacterized protein	C7B67_16880	filamentous cyanobacterium Phorm 6	173
L0DHM7	L0DHM7	L0DHM7_SINAD	unreviewed	RRM domain-containing RNA-binding protein	Sinac_3965	Singulisphaera acidiphila (strain ATCC BAA-1392 / DSM 18658 / VKM B-2454 / MOB10)	114
K9W333	K9W333	K9W333_9CYAN	unreviewed	Two component transcriptional regulator, LuxR family	Cri9333_3370	Crinalium epipsammum PCC 9333	239	phosphorelay signal transduction system [GO:0000160]; regulation of transcription, DNA-templated [GO:0006355]
L8N0G6	L8N0G6	L8N0G6_9CYAN	unreviewed	Phycocyanin, beta subunit	Pse7429DRAFT_3555	Pseudanabaena biceps PCC 7429	173	photosynthesis [GO:0015979]; protein-chromophore linkage [GO:0018298]
A0A0D8ZTV3	A0A0D8ZTV3	A0A0D8ZTV3_9CYAN	unreviewed	Phosphoglucosamine mutase	UH38_10520	Aliterella atlantica CENA595	479	carbohydrate metabolic process [GO:0005975]
A0A2T1CZ40	A0A2T1CZ40	A0A2T1CZ40_9CYAN	unreviewed	Uncharacterized protein	C7B69_20180	filamentous cyanobacterium Phorm 46	873
A0A0C2MBX4	A0A0C2MBX4	A0A0C2MBX4_9CYAN	unreviewed	Bicarbonate-binding protein	SD80_06765	Scytonema tolypothrichoides VB-61278	456	ion transport [GO:0006811]
A0A2T1FPT4	A0A2T1FPT4	A0A2T1FPT4_9CYAN	unreviewed	Histidine kinase	C7B67_19620	filamentous cyanobacterium Phorm 6	402
A0A2T1DF44	A0A2T1DF44	A0A2T1DF44_9CYAN	unreviewed	Phosphoribulokinase (EC 2.7.1.19)	C7B65_12485	Phormidesmis priestleyi ULC007	333	carbohydrate metabolic process [GO:0005975]
D8G191	D8G191	D8G191_9CYAN	unreviewed	D-3-phosphoglycerate dehydrogenase (EC 1.1.1.95)	OSCI_3000034	Kamptonema sp. PCC 6506	527	L-serine biosynthetic process [GO:0006564]
A0A4R8VT96	A0A4R8VT96	A0A4R8VT96_9MICO	unreviewed	30S ribosomal protein S9	rpsI E3O44_07800	Cryobacterium sp. MDB2-B	161	translation [GO:0006412]
A0A1Z4SA29	A0A1Z4SA29	A0A1Z4SA29_9NOSO	unreviewed	Phycobilisome linker polypeptide	NIES4103_42320	Nostoc sp. NIES-4103	253	photosynthesis [GO:0015979]
A0A1Y0RGE7	A0A1Y0RGE7	A0A1Y0RGE7_9CYAN	unreviewed	NADPH-protochlorophyllide oxidoreductase (EC 1.3.1.33)	BZZ01_05175	Nostocales cyanobacterium HT-58-2	320	chlorophyll biosynthetic process [GO:0015995]; photosynthesis [GO:0015979]
K9W058	K9W058	K9W058_9CYAN	unreviewed	50S ribosomal protein L15	rplO Cri9333_2300	Crinalium epipsammum PCC 9333	147	translation [GO:0006412]
A0A2G4F0E3	A0A2G4F0E3	A0A2G4F0E3_9CYAN	unreviewed	Superoxide dismutase (EC 1.15.1.1)	CP500_011895	Tychonema bourrellyi FEM_GT703	200
A0A2T1FYM6	A0A2T1FYM6	A0A2T1FYM6_9CYAN	unreviewed	SpoVT-AbrB domain-containing protein	C7B77_23165	Chamaesiphon polymorphus CCALA 037	128
A0A2W7A3F2	A0A2W7A3F2	A0A2W7A3F2_9CYAN	unreviewed	Photosystem I reaction center subunit XII	DCF22_18040	Leptolyngbya sp.	290	photosynthesis [GO:0015979]
A0A2T1EV35	A0A2T1EV35	A0A2T1EV35_9CYAN	unreviewed	DNA-directed RNA polymerase subunit alpha (RNAP subunit alpha) (EC 2.7.7.6) (RNA polymerase subunit alpha) (Transcriptase subunit alpha)	rpoA C7B69_04470	filamentous cyanobacterium Phorm 46	350	transcription, DNA-templated [GO:0006351]
A0A0K2LVT4	A0A0K2LVT4	A0A0K2LVT4_9NOST	unreviewed	Peptidyl-prolyl cis-trans isomerase (PPIase) (EC 5.2.1.8)	AA650_05135	Anabaena sp. WA102	260
A0A2T1GG36	A0A2T1GG36	A0A2T1GG36_9CYAN	unreviewed	AbrB family transcriptional regulator	C7B77_11470	Chamaesiphon polymorphus CCALA 037	133
K9VXM5	K9VXM5	K9VXM5_9CYAN	unreviewed	Photosystem I reaction center subunit II	Cri9333_1826	Crinalium epipsammum PCC 9333	154	photosynthesis [GO:0015979]
A0A0X8WR22	A0A0X8WR22	A0A0X8WR22_9CYAN	unreviewed	General L-amino acid-binding periplasmic protein AapJ	aapJ O77CONTIG1_00888	Leptolyngbya sp. O-77	367
A0A1Z4J4K7	A0A1Z4J4K7	A0A1Z4J4K7_9CYAN	unreviewed	Transketolase (EC 2.2.1.1)	SAMD00079811_68340	Scytonema sp. HK-05	670
A0A2T1CZ47	A0A2T1CZ47	A0A2T1CZ47_9CYAN	unreviewed	Phospholipid-binding protein	C7B69_20120	filamentous cyanobacterium Phorm 46	114
A0A0N7Z3N3	A0A0N7Z3N3	A0A0N7Z3N3_9CYAN	unreviewed	Polyketide_cyc domain-containing protein	NIES2104_02930	Leptolyngbya sp. NIES-2104	235
A0A2T1GHK6	A0A2T1GHK6	A0A2T1GHK6_9CYAN	unreviewed	Thioredoxin	trxA C7B77_09325	Chamaesiphon polymorphus CCALA 037	107	glycerol ether metabolic process [GO:0006662]
A0A357A6Y5	A0A357A6Y5	A0A357A6Y5_9CYAN	unreviewed	Carbon dioxide-concentrating protein CcmK	DD761_07525	Cyanobacteria bacterium UBA11691	112	carbon fixation [GO:0015977]
A0A2T1DYR8	A0A2T1DYR8	A0A2T1DYR8_9CYAN	unreviewed	Carbon dioxide concentrating mechanism protein CcmM (Carboxysome assembly protein CcmM)	C7B69_12345	filamentous cyanobacterium Phorm 46	552
A0A7C6DUT5	A0A7C6DUT5	A0A7C6DUT5_9BACT	unreviewed	DUF4331 domain-containing protein	ENR46_01100	Blastocatellia bacterium	511
A0A2T1DKH7	A0A2T1DKH7	A0A2T1DKH7_9CYAN	unreviewed	Molybdopterin-synthase adenylyltransferase MoeB	C7B65_05880	Phormidesmis priestleyi ULC007	390
A0A2W7B013	A0A2W7B013	A0A2W7B013_9CYAN	unreviewed	Transaldolase (EC 2.2.1.2)	tal DCF22_06395	Leptolyngbya sp.	392	carbohydrate metabolic process [GO:0005975]; pentose-phosphate shunt [GO:0006098]
A0A1D8TWI7	A0A1D8TWI7	A0A1D8TWI7_9CYAN	unreviewed	Glutathione S-transferase	BJP34_23620	Moorea producens PAL-8-15-08-1	199	glutathione metabolic process [GO:0006749]
A0A2T1CFT4	A0A2T1CFT4	A0A2T1CFT4_9CYAN	unreviewed	Uncharacterized protein	C7B69_23700	filamentous cyanobacterium Phorm 46	295
K9WGY9	K9WGY9	K9WGY9_9CYAN	unreviewed	Uncharacterized protein	Mic7113_3749	Microcoleus sp. PCC 7113	114
A0A2T1EP47	A0A2T1EP47	A0A2T1EP47_9CYAN	unreviewed	NTP_transf_9 domain-containing protein	C7B82_02990	Stenomitos frigidus ULC18	94
A0A2P8QT78	A0A2P8QT78	A0A2P8QT78_9CYAN	unreviewed	Allophycocyanin	C7Y66_08825	Chroococcidiopsis sp. CCALA 051	161	photosynthesis [GO:0015979]; protein-chromophore linkage [GO:0018298]
A0A1Z3HQM9	A0A1Z3HQM9	A0A1Z3HQM9_9CYAN	unreviewed	Phage shock protein A	XM38_035200	Halomicronema hongdechloris C2206	256
A0A6I5Q2W1	A0A6I5Q2W1	A0A6I5Q2W1_9CYAN	unreviewed	DNA starvation/stationary phase protection protein	F6K11_28130	Leptolyngbya sp. SIO3F4	180
K9W427	K9W427	K9W427_9CYAN	unreviewed	Catalase (EC 1.11.1.6)	Cri9333_4317	Crinalium epipsammum PCC 9333	229
A0A1Z4KZX7	A0A1Z4KZX7	A0A1Z4KZX7_NOSLI	unreviewed	Glutaredoxin family protein	NIES25_09950	Nostoc linckia NIES-25	246
A0A1G2ZJX9	A0A1G2ZJX9	A0A1G2ZJX9_9BACT	unreviewed	60 kDa chaperonin (GroEL protein) (Protein Cpn60)	groL groEL A2W23_09465	Planctomycetes bacterium RBG_16_43_13	563	protein refolding [GO:0042026]
A0A2W7AUK6	A0A2W7AUK6	A0A2W7AUK6_9CYAN	unreviewed	Uncharacterized protein	DCF22_00905	Leptolyngbya sp.	244
A0A0M0SKZ7	A0A0M0SKZ7	A0A0M0SKZ7_9CYAN	unreviewed	Elongation factor Ts (EF-Ts)	tsf AMR41_17445	Hapalosiphon sp. MRB220	219
A0A0F2R967	A0A0F2R967	A0A0F2R967_9PSED	unreviewed	Ferritin	VR76_00045 VR76_09035	Pseudomonas sp. BRH_c35	156
A0A077JHA5	A0A077JHA5	A0A077JHA5_9CYAN	unreviewed	Nitrogen-responsive regulatory protein	ntcA ETSB_1868	cyanobacterium endosymbiont of Epithemia turgida isolate EtSB Lake Yunoko	225
K9SA05	K9SA05	K9SA05_9CYAN	unreviewed	Argininosuccinate synthase (EC 6.3.4.5) (Citrulline--aspartate ligase)	argG GEI7407_2510	Geitlerinema sp. PCC 7407	401	arginine biosynthetic process [GO:0006526]
A0A522BUZ4	A0A522BUZ4	A0A522BUZ4_9ACTN	unreviewed	Cold-shock protein	EPN99_07700	Frankiales bacterium	67
A0A2T1DHN2	A0A2T1DHN2	A0A2T1DHN2_9CYAN	unreviewed	AbrB family transcriptional regulator	C7B69_16405	filamentous cyanobacterium Phorm 46	135
A0A0D2JVB6	A0A0D2JVB6	A0A0D2JVB6_9CHLO	unreviewed	Elongation factor Tu, chloroplastic	MNEG_5220	Monoraphidium neglectum	463
A0A2W7B944	A0A2W7B944	A0A2W7B944_9CYAN	unreviewed	BMP family ABC transporter substrate-binding protein	DCF22_01000	Leptolyngbya sp.	390
A0A1J1LRW1	A0A1J1LRW1	A0A1J1LRW1_9CYAN	unreviewed	UDP-glucuronate decarboxylase (EC 4.1.1.35)	PL9214650381	Planktothrix tepida PCC 9214	310	D-xylose metabolic process [GO:0042732]; UDP-D-xylose biosynthetic process [GO:0033320]
A0A6M0FE14	A0A6M0FE14	A0A6M0FE14_9CYAN	unreviewed	6-phosphogluconate dehydrogenase, decarboxylating (EC 1.1.1.44)	gnd F6K01_06360	Okeania sp. SIO1I7	473	D-gluconate metabolic process [GO:0019521]; pentose-phosphate shunt [GO:0006098]
A0A072YN03	A0A072YN03	A0A072YN03_CLONO	unreviewed	Putative regulatory protein Z958_02495	Z958_02495	Clostridium novyi B str. NCTC 9691	90
A0A1Q8Z7N5	A0A1Q8Z7N5	A0A1Q8Z7N5_9CYAN	unreviewed	DNA-directed RNA polymerase subunit alpha (RNAP subunit alpha) (EC 2.7.7.6) (RNA polymerase subunit alpha) (Transcriptase subunit alpha)	rpoA BST81_21845	Leptolyngbya sp. 'hensonii'	315	transcription, DNA-templated [GO:0006351]
K9VVG4	K9VVG4	K9VVG4_9CYAN	unreviewed	Uncharacterized protein	Cri9333_1179	Crinalium epipsammum PCC 9333	1058
A0A1Q8Z933	A0A1Q8Z933	A0A1Q8Z933_9CYAN	unreviewed	Chaperone protein DnaK (HSP70) (Heat shock 70 kDa protein) (Heat shock protein 70)	dnaK BST81_18980	Leptolyngbya sp. 'hensonii'	629	protein folding [GO:0006457]
A0A2T1ELH2	A0A2T1ELH2	A0A2T1ELH2_9CYAN	unreviewed	Rhodanese-like domain-containing protein	C7B69_06480	filamentous cyanobacterium Phorm 46	159
A0A0Q6R845	A0A0Q6R845	A0A0Q6R845_9MICO	unreviewed	Sugar ABC transporter substrate-binding protein	ASC54_01330	Yonghaparkia sp. Root332	451
A0A2T1CXQ4	A0A2T1CXQ4	A0A2T1CXQ4_9CYAN	unreviewed	Organic solvent tolerance protein OstA	C7B76_21675	filamentous cyanobacterium CCP2	163
A0A0Q7S9D4	A0A0Q7S9D4	A0A0Q7S9D4_9CAUL	unreviewed	OmpA-like domain-containing protein (Fragment)	ASD25_10625	Brevundimonas sp. Root1423	414	ion transport [GO:0006811]
A0A073CTD6	A0A073CTD6	A0A073CTD6_PLAAG	unreviewed	RbcR	rbcR A19Y_2354	Planktothrix agardhii NIVA-CYA 126/8	329
F5UED8	F5UED8	F5UED8_9CYAN	unreviewed	Glutaredoxin domain protein region	MicvaDRAFT_1970	Microcoleus vaginatus FGP-2	244

## Sheet: Vertebrate_contamination
Column1	Protein.Group	Accession	Description	probe_name	n_spec	codes	Mnemonic	Scientific.name
1	105	tr|A0A2R9AX99|A0A2R9AX99_PANPA	IF rod domain-containing protein OS=Pan paniscus OX=9597 GN=KRT9 PE=3 SV=1	B1	1	9597	PANPA	Pan paniscus
2	105	tr|A0A2R9AX99|A0A2R9AX99_PANPA	IF rod domain-containing protein OS=Pan paniscus OX=9597 GN=KRT9 PE=3 SV=1	B2	4	9597	PANPA	Pan paniscus
3	105	tr|A0A2R9AX99|A0A2R9AX99_PANPA	IF rod domain-containing protein OS=Pan paniscus OX=9597 GN=KRT9 PE=3 SV=1	B3	1	9597	PANPA	Pan paniscus
4	105	tr|A0A2R9AX99|A0A2R9AX99_PANPA	IF rod domain-containing protein OS=Pan paniscus OX=9597 GN=KRT9 PE=3 SV=1	B4	24	9597	PANPA	Pan paniscus
5	105	tr|A0A2R9AX99|A0A2R9AX99_PANPA	IF rod domain-containing protein OS=Pan paniscus OX=9597 GN=KRT9 PE=3 SV=1	B5	13	9597	PANPA	Pan paniscus
6	105	tr|A0A2R9AX99|A0A2R9AX99_PANPA	IF rod domain-containing protein OS=Pan paniscus OX=9597 GN=KRT9 PE=3 SV=1	B6	11	9597	PANPA	Pan paniscus
7	105	tr|A0A2R9AX99|A0A2R9AX99_PANPA	IF rod domain-containing protein OS=Pan paniscus OX=9597 GN=KRT9 PE=3 SV=1	K1	31	9597	PANPA	Pan paniscus
8	105	tr|A0A2R9AX99|A0A2R9AX99_PANPA	IF rod domain-containing protein OS=Pan paniscus OX=9597 GN=KRT9 PE=3 SV=1	K2	12	9597	PANPA	Pan paniscus
9	105	tr|A0A2R9AX99|A0A2R9AX99_PANPA	IF rod domain-containing protein OS=Pan paniscus OX=9597 GN=KRT9 PE=3 SV=1	K3	63	9597	PANPA	Pan paniscus
10	105	tr|A0A2R9AX99|A0A2R9AX99_PANPA	IF rod domain-containing protein OS=Pan paniscus OX=9597 GN=KRT9 PE=3 SV=1	K4	5	9597	PANPA	Pan paniscus
11	105	tr|A0A2R9AX99|A0A2R9AX99_PANPA	IF rod domain-containing protein OS=Pan paniscus OX=9597 GN=KRT9 PE=3 SV=1	K5	40	9597	PANPA	Pan paniscus
12	105	P35527|K1C9_HUMAN	Keratin type I cytoskeletal 9 OS=Homo sapiens OX=9606 GN=KRT9 PE=1 SV=3	B1	1	9606	HUMAN	Homo sapiens
13	105	P35527|K1C9_HUMAN	Keratin type I cytoskeletal 9 OS=Homo sapiens OX=9606 GN=KRT9 PE=1 SV=3	B2	4	9606	HUMAN	Homo sapiens
14	105	P35527|K1C9_HUMAN	Keratin type I cytoskeletal 9 OS=Homo sapiens OX=9606 GN=KRT9 PE=1 SV=3	B3	1	9606	HUMAN	Homo sapiens
15	105	P35527|K1C9_HUMAN	Keratin type I cytoskeletal 9 OS=Homo sapiens OX=9606 GN=KRT9 PE=1 SV=3	B4	24	9606	HUMAN	Homo sapiens
16	105	P35527|K1C9_HUMAN	Keratin type I cytoskeletal 9 OS=Homo sapiens OX=9606 GN=KRT9 PE=1 SV=3	B5	13	9606	HUMAN	Homo sapiens
17	105	P35527|K1C9_HUMAN	Keratin type I cytoskeletal 9 OS=Homo sapiens OX=9606 GN=KRT9 PE=1 SV=3	B6	11	9606	HUMAN	Homo sapiens
18	105	P35527|K1C9_HUMAN	Keratin type I cytoskeletal 9 OS=Homo sapiens OX=9606 GN=KRT9 PE=1 SV=3	K1	31	9606	HUMAN	Homo sapiens
19	105	P35527|K1C9_HUMAN	Keratin type I cytoskeletal 9 OS=Homo sapiens OX=9606 GN=KRT9 PE=1 SV=3	K2	12	9606	HUMAN	Homo sapiens
20	105	P35527|K1C9_HUMAN	Keratin type I cytoskeletal 9 OS=Homo sapiens OX=9606 GN=KRT9 PE=1 SV=3	K3	63	9606	HUMAN	Homo sapiens
21	105	P35527|K1C9_HUMAN	Keratin type I cytoskeletal 9 OS=Homo sapiens OX=9606 GN=KRT9 PE=1 SV=3	K4	5	9606	HUMAN	Homo sapiens
22	105	P35527|K1C9_HUMAN	Keratin type I cytoskeletal 9 OS=Homo sapiens OX=9606 GN=KRT9 PE=1 SV=3	K5	40	9606	HUMAN	Homo sapiens
23	105	tr|H2QCZ6|H2QCZ6_PANTR	Keratin 9 OS=Pan troglodytes OX=9598 GN=KRT9 PE=3 SV=2	B1	1	9598	PANTR	Pan troglodytes
24	105	tr|H2QCZ6|H2QCZ6_PANTR	Keratin 9 OS=Pan troglodytes OX=9598 GN=KRT9 PE=3 SV=2	B2	4	9598	PANTR	Pan troglodytes
25	105	tr|H2QCZ6|H2QCZ6_PANTR	Keratin 9 OS=Pan troglodytes OX=9598 GN=KRT9 PE=3 SV=2	B3	1	9598	PANTR	Pan troglodytes
26	105	tr|H2QCZ6|H2QCZ6_PANTR	Keratin 9 OS=Pan troglodytes OX=9598 GN=KRT9 PE=3 SV=2	B4	24	9598	PANTR	Pan troglodytes
27	105	tr|H2QCZ6|H2QCZ6_PANTR	Keratin 9 OS=Pan troglodytes OX=9598 GN=KRT9 PE=3 SV=2	B5	13	9598	PANTR	Pan troglodytes
28	105	tr|H2QCZ6|H2QCZ6_PANTR	Keratin 9 OS=Pan troglodytes OX=9598 GN=KRT9 PE=3 SV=2	B6	11	9598	PANTR	Pan troglodytes
29	105	tr|H2QCZ6|H2QCZ6_PANTR	Keratin 9 OS=Pan troglodytes OX=9598 GN=KRT9 PE=3 SV=2	K1	31	9598	PANTR	Pan troglodytes
30	105	tr|H2QCZ6|H2QCZ6_PANTR	Keratin 9 OS=Pan troglodytes OX=9598 GN=KRT9 PE=3 SV=2	K2	12	9598	PANTR	Pan troglodytes
31	105	tr|H2QCZ6|H2QCZ6_PANTR	Keratin 9 OS=Pan troglodytes OX=9598 GN=KRT9 PE=3 SV=2	K3	63	9598	PANTR	Pan troglodytes
32	105	tr|H2QCZ6|H2QCZ6_PANTR	Keratin 9 OS=Pan troglodytes OX=9598 GN=KRT9 PE=3 SV=2	K4	5	9598	PANTR	Pan troglodytes
33	105	tr|H2QCZ6|H2QCZ6_PANTR	Keratin 9 OS=Pan troglodytes OX=9598 GN=KRT9 PE=3 SV=2	K5	40	9598	PANTR	Pan troglodytes
34	105	tr|A0A6D2VYW7|A0A6D2VYW7_PANTR	KRT9 isoform 1 OS=Pan troglodytes OX=9598 GN=CK820_G0039031 PE=3 SV=1	B1	1	9598	PANTR	Pan troglodytes
35	105	tr|A0A6D2VYW7|A0A6D2VYW7_PANTR	KRT9 isoform 1 OS=Pan troglodytes OX=9598 GN=CK820_G0039031 PE=3 SV=1	B2	4	9598	PANTR	Pan troglodytes
36	105	tr|A0A6D2VYW7|A0A6D2VYW7_PANTR	KRT9 isoform 1 OS=Pan troglodytes OX=9598 GN=CK820_G0039031 PE=3 SV=1	B3	1	9598	PANTR	Pan troglodytes
37	105	tr|A0A6D2VYW7|A0A6D2VYW7_PANTR	KRT9 isoform 1 OS=Pan troglodytes OX=9598 GN=CK820_G0039031 PE=3 SV=1	B4	24	9598	PANTR	Pan troglodytes
38	105	tr|A0A6D2VYW7|A0A6D2VYW7_PANTR	KRT9 isoform 1 OS=Pan troglodytes OX=9598 GN=CK820_G0039031 PE=3 SV=1	B5	13	9598	PANTR	Pan troglodytes
39	105	tr|A0A6D2VYW7|A0A6D2VYW7_PANTR	KRT9 isoform 1 OS=Pan troglodytes OX=9598 GN=CK820_G0039031 PE=3 SV=1	B6	11	9598	PANTR	Pan troglodytes
40	105	tr|A0A6D2VYW7|A0A6D2VYW7_PANTR	KRT9 isoform 1 OS=Pan troglodytes OX=9598 GN=CK820_G0039031 PE=3 SV=1	K1	31	9598	PANTR	Pan troglodytes
41	105	tr|A0A6D2VYW7|A0A6D2VYW7_PANTR	KRT9 isoform 1 OS=Pan troglodytes OX=9598 GN=CK820_G0039031 PE=3 SV=1	K2	12	9598	PANTR	Pan troglodytes
42	105	tr|A0A6D2VYW7|A0A6D2VYW7_PANTR	KRT9 isoform 1 OS=Pan troglodytes OX=9598 GN=CK820_G0039031 PE=3 SV=1	K3	63	9598	PANTR	Pan troglodytes
43	105	tr|A0A6D2VYW7|A0A6D2VYW7_PANTR	KRT9 isoform 1 OS=Pan troglodytes OX=9598 GN=CK820_G0039031 PE=3 SV=1	K4	5	9598	PANTR	Pan troglodytes
44	105	tr|A0A6D2VYW7|A0A6D2VYW7_PANTR	KRT9 isoform 1 OS=Pan troglodytes OX=9598 GN=CK820_G0039031 PE=3 SV=1	K5	40	9598	PANTR	Pan troglodytes
45	151	P35908|K22E_HUMAN	Keratin type II cytoskeletal 2 epidermal OS=Homo sapiens OX=9606 GN=KRT2 PE=1 SV=2	B1	2	9606	HUMAN	Homo sapiens
46	151	P35908|K22E_HUMAN	Keratin type II cytoskeletal 2 epidermal OS=Homo sapiens OX=9606 GN=KRT2 PE=1 SV=2	B2	10	9606	HUMAN	Homo sapiens
47	151	P35908|K22E_HUMAN	Keratin type II cytoskeletal 2 epidermal OS=Homo sapiens OX=9606 GN=KRT2 PE=1 SV=2	B3	1	9606	HUMAN	Homo sapiens
48	151	P35908|K22E_HUMAN	Keratin type II cytoskeletal 2 epidermal OS=Homo sapiens OX=9606 GN=KRT2 PE=1 SV=2	B4	12	9606	HUMAN	Homo sapiens
49	151	P35908|K22E_HUMAN	Keratin type II cytoskeletal 2 epidermal OS=Homo sapiens OX=9606 GN=KRT2 PE=1 SV=2	B5	4	9606	HUMAN	Homo sapiens
50	151	P35908|K22E_HUMAN	Keratin type II cytoskeletal 2 epidermal OS=Homo sapiens OX=9606 GN=KRT2 PE=1 SV=2	B6	3	9606	HUMAN	Homo sapiens
51	151	P35908|K22E_HUMAN	Keratin type II cytoskeletal 2 epidermal OS=Homo sapiens OX=9606 GN=KRT2 PE=1 SV=2	K1	28	9606	HUMAN	Homo sapiens
52	151	P35908|K22E_HUMAN	Keratin type II cytoskeletal 2 epidermal OS=Homo sapiens OX=9606 GN=KRT2 PE=1 SV=2	K2	20	9606	HUMAN	Homo sapiens
53	151	P35908|K22E_HUMAN	Keratin type II cytoskeletal 2 epidermal OS=Homo sapiens OX=9606 GN=KRT2 PE=1 SV=2	K3	44	9606	HUMAN	Homo sapiens
54	151	P35908|K22E_HUMAN	Keratin type II cytoskeletal 2 epidermal OS=Homo sapiens OX=9606 GN=KRT2 PE=1 SV=2	K4	9	9606	HUMAN	Homo sapiens
55	151	P35908|K22E_HUMAN	Keratin type II cytoskeletal 2 epidermal OS=Homo sapiens OX=9606 GN=KRT2 PE=1 SV=2	K5	40	9606	HUMAN	Homo sapiens
56	93	tr|G3QDX0|G3QDX0_GORGO	Keratin 10 OS=Gorilla gorilla gorilla OX=9595 GN=KRT10 PE=3 SV=2	B1	0	9595	GORGO	Gorilla gorilla gorilla
57	93	tr|G3QDX0|G3QDX0_GORGO	Keratin 10 OS=Gorilla gorilla gorilla OX=9595 GN=KRT10 PE=3 SV=2	B2	9	9595	GORGO	Gorilla gorilla gorilla
58	93	tr|G3QDX0|G3QDX0_GORGO	Keratin 10 OS=Gorilla gorilla gorilla OX=9595 GN=KRT10 PE=3 SV=2	B3	2	9595	GORGO	Gorilla gorilla gorilla
59	93	tr|G3QDX0|G3QDX0_GORGO	Keratin 10 OS=Gorilla gorilla gorilla OX=9595 GN=KRT10 PE=3 SV=2	B4	17	9595	GORGO	Gorilla gorilla gorilla
60	93	tr|G3QDX0|G3QDX0_GORGO	Keratin 10 OS=Gorilla gorilla gorilla OX=9595 GN=KRT10 PE=3 SV=2	B5	4	9595	GORGO	Gorilla gorilla gorilla
61	93	tr|G3QDX0|G3QDX0_GORGO	Keratin 10 OS=Gorilla gorilla gorilla OX=9595 GN=KRT10 PE=3 SV=2	B6	8	9595	GORGO	Gorilla gorilla gorilla
62	93	tr|G3QDX0|G3QDX0_GORGO	Keratin 10 OS=Gorilla gorilla gorilla OX=9595 GN=KRT10 PE=3 SV=2	K1	33	9595	GORGO	Gorilla gorilla gorilla
63	93	tr|G3QDX0|G3QDX0_GORGO	Keratin 10 OS=Gorilla gorilla gorilla OX=9595 GN=KRT10 PE=3 SV=2	K2	18	9595	GORGO	Gorilla gorilla gorilla
64	93	tr|G3QDX0|G3QDX0_GORGO	Keratin 10 OS=Gorilla gorilla gorilla OX=9595 GN=KRT10 PE=3 SV=2	K3	83	9595	GORGO	Gorilla gorilla gorilla
65	93	tr|G3QDX0|G3QDX0_GORGO	Keratin 10 OS=Gorilla gorilla gorilla OX=9595 GN=KRT10 PE=3 SV=2	K4	11	9595	GORGO	Gorilla gorilla gorilla
66	93	tr|G3QDX0|G3QDX0_GORGO	Keratin 10 OS=Gorilla gorilla gorilla OX=9595 GN=KRT10 PE=3 SV=2	K5	30	9595	GORGO	Gorilla gorilla gorilla
67	93	tr|A0A2R9BVY1|A0A2R9BVY1_PANPA	IF rod domain-containing protein OS=Pan paniscus OX=9597 GN=KRT10 PE=3 SV=1	B1	0	9597	PANPA	Pan paniscus
68	93	tr|A0A2R9BVY1|A0A2R9BVY1_PANPA	IF rod domain-containing protein OS=Pan paniscus OX=9597 GN=KRT10 PE=3 SV=1	B2	9	9597	PANPA	Pan paniscus
69	93	tr|A0A2R9BVY1|A0A2R9BVY1_PANPA	IF rod domain-containing protein OS=Pan paniscus OX=9597 GN=KRT10 PE=3 SV=1	B3	2	9597	PANPA	Pan paniscus
70	93	tr|A0A2R9BVY1|A0A2R9BVY1_PANPA	IF rod domain-containing protein OS=Pan paniscus OX=9597 GN=KRT10 PE=3 SV=1	B4	17	9597	PANPA	Pan paniscus
71	93	tr|A0A2R9BVY1|A0A2R9BVY1_PANPA	IF rod domain-containing protein OS=Pan paniscus OX=9597 GN=KRT10 PE=3 SV=1	B5	4	9597	PANPA	Pan paniscus
72	93	tr|A0A2R9BVY1|A0A2R9BVY1_PANPA	IF rod domain-containing protein OS=Pan paniscus OX=9597 GN=KRT10 PE=3 SV=1	B6	8	9597	PANPA	Pan paniscus
73	93	tr|A0A2R9BVY1|A0A2R9BVY1_PANPA	IF rod domain-containing protein OS=Pan paniscus OX=9597 GN=KRT10 PE=3 SV=1	K1	33	9597	PANPA	Pan paniscus
74	93	tr|A0A2R9BVY1|A0A2R9BVY1_PANPA	IF rod domain-containing protein OS=Pan paniscus OX=9597 GN=KRT10 PE=3 SV=1	K2	18	9597	PANPA	Pan paniscus
75	93	tr|A0A2R9BVY1|A0A2R9BVY1_PANPA	IF rod domain-containing protein OS=Pan paniscus OX=9597 GN=KRT10 PE=3 SV=1	K3	83	9597	PANPA	Pan paniscus
76	93	tr|A0A2R9BVY1|A0A2R9BVY1_PANPA	IF rod domain-containing protein OS=Pan paniscus OX=9597 GN=KRT10 PE=3 SV=1	K4	11	9597	PANPA	Pan paniscus
77	93	tr|A0A2R9BVY1|A0A2R9BVY1_PANPA	IF rod domain-containing protein OS=Pan paniscus OX=9597 GN=KRT10 PE=3 SV=1	K5	30	9597	PANPA	Pan paniscus
78	93	P13645|K1C10_HUMAN	Keratin type I cytoskeletal 10 OS=Homo sapiens OX=9606 GN=KRT10 PE=1 SV=6	B1	0	9606	HUMAN	Homo sapiens
79	93	P13645|K1C10_HUMAN	Keratin type I cytoskeletal 10 OS=Homo sapiens OX=9606 GN=KRT10 PE=1 SV=6	B2	9	9606	HUMAN	Homo sapiens
80	93	P13645|K1C10_HUMAN	Keratin type I cytoskeletal 10 OS=Homo sapiens OX=9606 GN=KRT10 PE=1 SV=6	B3	2	9606	HUMAN	Homo sapiens
81	93	P13645|K1C10_HUMAN	Keratin type I cytoskeletal 10 OS=Homo sapiens OX=9606 GN=KRT10 PE=1 SV=6	B4	17	9606	HUMAN	Homo sapiens
82	93	P13645|K1C10_HUMAN	Keratin type I cytoskeletal 10 OS=Homo sapiens OX=9606 GN=KRT10 PE=1 SV=6	B5	4	9606	HUMAN	Homo sapiens
83	93	P13645|K1C10_HUMAN	Keratin type I cytoskeletal 10 OS=Homo sapiens OX=9606 GN=KRT10 PE=1 SV=6	B6	8	9606	HUMAN	Homo sapiens
84	93	P13645|K1C10_HUMAN	Keratin type I cytoskeletal 10 OS=Homo sapiens OX=9606 GN=KRT10 PE=1 SV=6	K1	33	9606	HUMAN	Homo sapiens
85	93	P13645|K1C10_HUMAN	Keratin type I cytoskeletal 10 OS=Homo sapiens OX=9606 GN=KRT10 PE=1 SV=6	K2	18	9606	HUMAN	Homo sapiens
86	93	P13645|K1C10_HUMAN	Keratin type I cytoskeletal 10 OS=Homo sapiens OX=9606 GN=KRT10 PE=1 SV=6	K3	83	9606	HUMAN	Homo sapiens
87	93	P13645|K1C10_HUMAN	Keratin type I cytoskeletal 10 OS=Homo sapiens OX=9606 GN=KRT10 PE=1 SV=6	K4	11	9606	HUMAN	Homo sapiens
88	93	P13645|K1C10_HUMAN	Keratin type I cytoskeletal 10 OS=Homo sapiens OX=9606 GN=KRT10 PE=1 SV=6	K5	30	9606	HUMAN	Homo sapiens
89	93	tr|A0A6D2XF65|A0A6D2XF65_PANTR	KRT10 isoform 1 OS=Pan troglodytes OX=9598 GN=CK820_G0039100 PE=3 SV=1	B1	0	9598	PANTR	Pan troglodytes
90	93	tr|A0A6D2XF65|A0A6D2XF65_PANTR	KRT10 isoform 1 OS=Pan troglodytes OX=9598 GN=CK820_G0039100 PE=3 SV=1	B2	9	9598	PANTR	Pan troglodytes
91	93	tr|A0A6D2XF65|A0A6D2XF65_PANTR	KRT10 isoform 1 OS=Pan troglodytes OX=9598 GN=CK820_G0039100 PE=3 SV=1	B3	2	9598	PANTR	Pan troglodytes
92	93	tr|A0A6D2XF65|A0A6D2XF65_PANTR	KRT10 isoform 1 OS=Pan troglodytes OX=9598 GN=CK820_G0039100 PE=3 SV=1	B4	17	9598	PANTR	Pan troglodytes
93	93	tr|A0A6D2XF65|A0A6D2XF65_PANTR	KRT10 isoform 1 OS=Pan troglodytes OX=9598 GN=CK820_G0039100 PE=3 SV=1	B5	4	9598	PANTR	Pan troglodytes
94	93	tr|A0A6D2XF65|A0A6D2XF65_PANTR	KRT10 isoform 1 OS=Pan troglodytes OX=9598 GN=CK820_G0039100 PE=3 SV=1	B6	8	9598	PANTR	Pan troglodytes
95	93	tr|A0A6D2XF65|A0A6D2XF65_PANTR	KRT10 isoform 1 OS=Pan troglodytes OX=9598 GN=CK820_G0039100 PE=3 SV=1	K1	33	9598	PANTR	Pan troglodytes
96	93	tr|A0A6D2XF65|A0A6D2XF65_PANTR	KRT10 isoform 1 OS=Pan troglodytes OX=9598 GN=CK820_G0039100 PE=3 SV=1	K2	18	9598	PANTR	Pan troglodytes
97	93	tr|A0A6D2XF65|A0A6D2XF65_PANTR	KRT10 isoform 1 OS=Pan troglodytes OX=9598 GN=CK820_G0039100 PE=3 SV=1	K3	83	9598	PANTR	Pan troglodytes
98	93	tr|A0A6D2XF65|A0A6D2XF65_PANTR	KRT10 isoform 1 OS=Pan troglodytes OX=9598 GN=CK820_G0039100 PE=3 SV=1	K4	11	9598	PANTR	Pan troglodytes
99	93	tr|A0A6D2XF65|A0A6D2XF65_PANTR	KRT10 isoform 1 OS=Pan troglodytes OX=9598 GN=CK820_G0039100 PE=3 SV=1	K5	30	9598	PANTR	Pan troglodytes
100	93	tr|H2QCX3|H2QCX3_PANTR	Keratin 10 OS=Pan troglodytes OX=9598 GN=KRT10 PE=3 SV=1	B1	0	9598	PANTR	Pan troglodytes
101	93	tr|H2QCX3|H2QCX3_PANTR	Keratin 10 OS=Pan troglodytes OX=9598 GN=KRT10 PE=3 SV=1	B2	9	9598	PANTR	Pan troglodytes
102	93	tr|H2QCX3|H2QCX3_PANTR	Keratin 10 OS=Pan troglodytes OX=9598 GN=KRT10 PE=3 SV=1	B3	2	9598	PANTR	Pan troglodytes
103	93	tr|H2QCX3|H2QCX3_PANTR	Keratin 10 OS=Pan troglodytes OX=9598 GN=KRT10 PE=3 SV=1	B4	17	9598	PANTR	Pan troglodytes
104	93	tr|H2QCX3|H2QCX3_PANTR	Keratin 10 OS=Pan troglodytes OX=9598 GN=KRT10 PE=3 SV=1	B5	4	9598	PANTR	Pan troglodytes
105	93	tr|H2QCX3|H2QCX3_PANTR	Keratin 10 OS=Pan troglodytes OX=9598 GN=KRT10 PE=3 SV=1	B6	8	9598	PANTR	Pan troglodytes
106	93	tr|H2QCX3|H2QCX3_PANTR	Keratin 10 OS=Pan troglodytes OX=9598 GN=KRT10 PE=3 SV=1	K1	33	9598	PANTR	Pan troglodytes
107	93	tr|H2QCX3|H2QCX3_PANTR	Keratin 10 OS=Pan troglodytes OX=9598 GN=KRT10 PE=3 SV=1	K2	18	9598	PANTR	Pan troglodytes
108	93	tr|H2QCX3|H2QCX3_PANTR	Keratin 10 OS=Pan troglodytes OX=9598 GN=KRT10 PE=3 SV=1	K3	83	9598	PANTR	Pan troglodytes
109	93	tr|H2QCX3|H2QCX3_PANTR	Keratin 10 OS=Pan troglodytes OX=9598 GN=KRT10 PE=3 SV=1	K4	11	9598	PANTR	Pan troglodytes
110	93	tr|H2QCX3|H2QCX3_PANTR	Keratin 10 OS=Pan troglodytes OX=9598 GN=KRT10 PE=3 SV=1	K5	30	9598	PANTR	Pan troglodytes
111	541	tr|A0A0D9S2F0|A0A0D9S2F0_CHLSB	IF rod domain-containing protein OS=Chlorocebus sabaeus OX=60711 GN=KRT14 PE=3 SV=1	B1	0	60711	CHLSB	Chlorocebus sabaeus
112	541	tr|A0A0D9S2F0|A0A0D9S2F0_CHLSB	IF rod domain-containing protein OS=Chlorocebus sabaeus OX=60711 GN=KRT14 PE=3 SV=1	B2	0	60711	CHLSB	Chlorocebus sabaeus
113	541	tr|A0A0D9S2F0|A0A0D9S2F0_CHLSB	IF rod domain-containing protein OS=Chlorocebus sabaeus OX=60711 GN=KRT14 PE=3 SV=1	B3	0	60711	CHLSB	Chlorocebus sabaeus
114	541	tr|A0A0D9S2F0|A0A0D9S2F0_CHLSB	IF rod domain-containing protein OS=Chlorocebus sabaeus OX=60711 GN=KRT14 PE=3 SV=1	B4	5	60711	CHLSB	Chlorocebus sabaeus
115	541	tr|A0A0D9S2F0|A0A0D9S2F0_CHLSB	IF rod domain-containing protein OS=Chlorocebus sabaeus OX=60711 GN=KRT14 PE=3 SV=1	B5	3	60711	CHLSB	Chlorocebus sabaeus
116	541	tr|A0A0D9S2F0|A0A0D9S2F0_CHLSB	IF rod domain-containing protein OS=Chlorocebus sabaeus OX=60711 GN=KRT14 PE=3 SV=1	B6	1	60711	CHLSB	Chlorocebus sabaeus
117	541	tr|A0A0D9S2F0|A0A0D9S2F0_CHLSB	IF rod domain-containing protein OS=Chlorocebus sabaeus OX=60711 GN=KRT14 PE=3 SV=1	K1	19	60711	CHLSB	Chlorocebus sabaeus
118	541	tr|A0A0D9S2F0|A0A0D9S2F0_CHLSB	IF rod domain-containing protein OS=Chlorocebus sabaeus OX=60711 GN=KRT14 PE=3 SV=1	K2	5	60711	CHLSB	Chlorocebus sabaeus
119	541	tr|A0A0D9S2F0|A0A0D9S2F0_CHLSB	IF rod domain-containing protein OS=Chlorocebus sabaeus OX=60711 GN=KRT14 PE=3 SV=1	K3	15	60711	CHLSB	Chlorocebus sabaeus
120	541	tr|A0A0D9S2F0|A0A0D9S2F0_CHLSB	IF rod domain-containing protein OS=Chlorocebus sabaeus OX=60711 GN=KRT14 PE=3 SV=1	K4	1	60711	CHLSB	Chlorocebus sabaeus
121	541	tr|A0A0D9S2F0|A0A0D9S2F0_CHLSB	IF rod domain-containing protein OS=Chlorocebus sabaeus OX=60711 GN=KRT14 PE=3 SV=1	K5	8	60711	CHLSB	Chlorocebus sabaeus
122	541	tr|A0A2K6E2S6|A0A2K6E2S6_MACNE	IF rod domain-containing protein OS=Macaca nemestrina OX=9545 GN=KRT14 PE=3 SV=1	B1	0	9545	MACNE	Macaca nemestrina
123	541	tr|A0A2K6E2S6|A0A2K6E2S6_MACNE	IF rod domain-containing protein OS=Macaca nemestrina OX=9545 GN=KRT14 PE=3 SV=1	B2	0	9545	MACNE	Macaca nemestrina
124	541	tr|A0A2K6E2S6|A0A2K6E2S6_MACNE	IF rod domain-containing protein OS=Macaca nemestrina OX=9545 GN=KRT14 PE=3 SV=1	B3	0	9545	MACNE	Macaca nemestrina
125	541	tr|A0A2K6E2S6|A0A2K6E2S6_MACNE	IF rod domain-containing protein OS=Macaca nemestrina OX=9545 GN=KRT14 PE=3 SV=1	B4	5	9545	MACNE	Macaca nemestrina
126	541	tr|A0A2K6E2S6|A0A2K6E2S6_MACNE	IF rod domain-containing protein OS=Macaca nemestrina OX=9545 GN=KRT14 PE=3 SV=1	B5	3	9545	MACNE	Macaca nemestrina
127	541	tr|A0A2K6E2S6|A0A2K6E2S6_MACNE	IF rod domain-containing protein OS=Macaca nemestrina OX=9545 GN=KRT14 PE=3 SV=1	B6	1	9545	MACNE	Macaca nemestrina
128	541	tr|A0A2K6E2S6|A0A2K6E2S6_MACNE	IF rod domain-containing protein OS=Macaca nemestrina OX=9545 GN=KRT14 PE=3 SV=1	K1	19	9545	MACNE	Macaca nemestrina
129	541	tr|A0A2K6E2S6|A0A2K6E2S6_MACNE	IF rod domain-containing protein OS=Macaca nemestrina OX=9545 GN=KRT14 PE=3 SV=1	K2	5	9545	MACNE	Macaca nemestrina
130	541	tr|A0A2K6E2S6|A0A2K6E2S6_MACNE	IF rod domain-containing protein OS=Macaca nemestrina OX=9545 GN=KRT14 PE=3 SV=1	K3	15	9545	MACNE	Macaca nemestrina
131	541	tr|A0A2K6E2S6|A0A2K6E2S6_MACNE	IF rod domain-containing protein OS=Macaca nemestrina OX=9545 GN=KRT14 PE=3 SV=1	K4	1	9545	MACNE	Macaca nemestrina
132	541	tr|A0A2K6E2S6|A0A2K6E2S6_MACNE	IF rod domain-containing protein OS=Macaca nemestrina OX=9545 GN=KRT14 PE=3 SV=1	K5	8	9545	MACNE	Macaca nemestrina
133	541	tr|A0A2R9CHA8|A0A2R9CHA8_PANPA	IF rod domain-containing protein OS=Pan paniscus OX=9597 GN=KRT14 PE=3 SV=1	B1	0	9597	PANPA	Pan paniscus
134	541	tr|A0A2R9CHA8|A0A2R9CHA8_PANPA	IF rod domain-containing protein OS=Pan paniscus OX=9597 GN=KRT14 PE=3 SV=1	B2	0	9597	PANPA	Pan paniscus
135	541	tr|A0A2R9CHA8|A0A2R9CHA8_PANPA	IF rod domain-containing protein OS=Pan paniscus OX=9597 GN=KRT14 PE=3 SV=1	B3	0	9597	PANPA	Pan paniscus
136	541	tr|A0A2R9CHA8|A0A2R9CHA8_PANPA	IF rod domain-containing protein OS=Pan paniscus OX=9597 GN=KRT14 PE=3 SV=1	B4	5	9597	PANPA	Pan paniscus
137	541	tr|A0A2R9CHA8|A0A2R9CHA8_PANPA	IF rod domain-containing protein OS=Pan paniscus OX=9597 GN=KRT14 PE=3 SV=1	B5	3	9597	PANPA	Pan paniscus
138	541	tr|A0A2R9CHA8|A0A2R9CHA8_PANPA	IF rod domain-containing protein OS=Pan paniscus OX=9597 GN=KRT14 PE=3 SV=1	B6	1	9597	PANPA	Pan paniscus
139	541	tr|A0A2R9CHA8|A0A2R9CHA8_PANPA	IF rod domain-containing protein OS=Pan paniscus OX=9597 GN=KRT14 PE=3 SV=1	K1	19	9597	PANPA	Pan paniscus
140	541	tr|A0A2R9CHA8|A0A2R9CHA8_PANPA	IF rod domain-containing protein OS=Pan paniscus OX=9597 GN=KRT14 PE=3 SV=1	K2	5	9597	PANPA	Pan paniscus
141	541	tr|A0A2R9CHA8|A0A2R9CHA8_PANPA	IF rod domain-containing protein OS=Pan paniscus OX=9597 GN=KRT14 PE=3 SV=1	K3	15	9597	PANPA	Pan paniscus
142	541	tr|A0A2R9CHA8|A0A2R9CHA8_PANPA	IF rod domain-containing protein OS=Pan paniscus OX=9597 GN=KRT14 PE=3 SV=1	K4	1	9597	PANPA	Pan paniscus
143	541	tr|A0A2R9CHA8|A0A2R9CHA8_PANPA	IF rod domain-containing protein OS=Pan paniscus OX=9597 GN=KRT14 PE=3 SV=1	K5	8	9597	PANPA	Pan paniscus
144	541	tr|A0A096P5N3|A0A096P5N3_PAPAN	IF rod domain-containing protein OS=Papio anubis OX=9555 GN=KRT14 PE=3 SV=1	B1	0	9555	PAPAN	Papio anubis
145	541	tr|A0A096P5N3|A0A096P5N3_PAPAN	IF rod domain-containing protein OS=Papio anubis OX=9555 GN=KRT14 PE=3 SV=1	B2	0	9555	PAPAN	Papio anubis
146	541	tr|A0A096P5N3|A0A096P5N3_PAPAN	IF rod domain-containing protein OS=Papio anubis OX=9555 GN=KRT14 PE=3 SV=1	B3	0	9555	PAPAN	Papio anubis
147	541	tr|A0A096P5N3|A0A096P5N3_PAPAN	IF rod domain-containing protein OS=Papio anubis OX=9555 GN=KRT14 PE=3 SV=1	B4	5	9555	PAPAN	Papio anubis
148	541	tr|A0A096P5N3|A0A096P5N3_PAPAN	IF rod domain-containing protein OS=Papio anubis OX=9555 GN=KRT14 PE=3 SV=1	B5	3	9555	PAPAN	Papio anubis
149	541	tr|A0A096P5N3|A0A096P5N3_PAPAN	IF rod domain-containing protein OS=Papio anubis OX=9555 GN=KRT14 PE=3 SV=1	B6	1	9555	PAPAN	Papio anubis
150	541	tr|A0A096P5N3|A0A096P5N3_PAPAN	IF rod domain-containing protein OS=Papio anubis OX=9555 GN=KRT14 PE=3 SV=1	K1	19	9555	PAPAN	Papio anubis
151	541	tr|A0A096P5N3|A0A096P5N3_PAPAN	IF rod domain-containing protein OS=Papio anubis OX=9555 GN=KRT14 PE=3 SV=1	K2	5	9555	PAPAN	Papio anubis
152	541	tr|A0A096P5N3|A0A096P5N3_PAPAN	IF rod domain-containing protein OS=Papio anubis OX=9555 GN=KRT14 PE=3 SV=1	K3	15	9555	PAPAN	Papio anubis
153	541	tr|A0A096P5N3|A0A096P5N3_PAPAN	IF rod domain-containing protein OS=Papio anubis OX=9555 GN=KRT14 PE=3 SV=1	K4	1	9555	PAPAN	Papio anubis
154	541	tr|A0A096P5N3|A0A096P5N3_PAPAN	IF rod domain-containing protein OS=Papio anubis OX=9555 GN=KRT14 PE=3 SV=1	K5	8	9555	PAPAN	Papio anubis
155	541	tr|H2NVQ7|H2NVQ7_PONAB	IF rod domain-containing protein OS=Pongo abelii OX=9601 PE=3 SV=1	B1	0	9601	PONAB	Pongo abelii
156	541	tr|H2NVQ7|H2NVQ7_PONAB	IF rod domain-containing protein OS=Pongo abelii OX=9601 PE=3 SV=1	B2	0	9601	PONAB	Pongo abelii
157	541	tr|H2NVQ7|H2NVQ7_PONAB	IF rod domain-containing protein OS=Pongo abelii OX=9601 PE=3 SV=1	B3	0	9601	PONAB	Pongo abelii
158	541	tr|H2NVQ7|H2NVQ7_PONAB	IF rod domain-containing protein OS=Pongo abelii OX=9601 PE=3 SV=1	B4	5	9601	PONAB	Pongo abelii
159	541	tr|H2NVQ7|H2NVQ7_PONAB	IF rod domain-containing protein OS=Pongo abelii OX=9601 PE=3 SV=1	B5	3	9601	PONAB	Pongo abelii
160	541	tr|H2NVQ7|H2NVQ7_PONAB	IF rod domain-containing protein OS=Pongo abelii OX=9601 PE=3 SV=1	B6	1	9601	PONAB	Pongo abelii
161	541	tr|H2NVQ7|H2NVQ7_PONAB	IF rod domain-containing protein OS=Pongo abelii OX=9601 PE=3 SV=1	K1	19	9601	PONAB	Pongo abelii
162	541	tr|H2NVQ7|H2NVQ7_PONAB	IF rod domain-containing protein OS=Pongo abelii OX=9601 PE=3 SV=1	K2	5	9601	PONAB	Pongo abelii
163	541	tr|H2NVQ7|H2NVQ7_PONAB	IF rod domain-containing protein OS=Pongo abelii OX=9601 PE=3 SV=1	K3	15	9601	PONAB	Pongo abelii
164	541	tr|H2NVQ7|H2NVQ7_PONAB	IF rod domain-containing protein OS=Pongo abelii OX=9601 PE=3 SV=1	K4	1	9601	PONAB	Pongo abelii
165	541	tr|H2NVQ7|H2NVQ7_PONAB	IF rod domain-containing protein OS=Pongo abelii OX=9601 PE=3 SV=1	K5	8	9601	PONAB	Pongo abelii
166	541	tr|A0A2K5ZWJ8|A0A2K5ZWJ8_MANLE	IF rod domain-containing protein OS=Mandrillus leucophaeus OX=9568 GN=KRT14 PE=3 SV=1	B1	0	9568	MANLE	Mandrillus leucophaeus
167	541	tr|A0A2K5ZWJ8|A0A2K5ZWJ8_MANLE	IF rod domain-containing protein OS=Mandrillus leucophaeus OX=9568 GN=KRT14 PE=3 SV=1	B2	0	9568	MANLE	Mandrillus leucophaeus
168	541	tr|A0A2K5ZWJ8|A0A2K5ZWJ8_MANLE	IF rod domain-containing protein OS=Mandrillus leucophaeus OX=9568 GN=KRT14 PE=3 SV=1	B3	0	9568	MANLE	Mandrillus leucophaeus
169	541	tr|A0A2K5ZWJ8|A0A2K5ZWJ8_MANLE	IF rod domain-containing protein OS=Mandrillus leucophaeus OX=9568 GN=KRT14 PE=3 SV=1	B4	5	9568	MANLE	Mandrillus leucophaeus
170	541	tr|A0A2K5ZWJ8|A0A2K5ZWJ8_MANLE	IF rod domain-containing protein OS=Mandrillus leucophaeus OX=9568 GN=KRT14 PE=3 SV=1	B5	3	9568	MANLE	Mandrillus leucophaeus
171	541	tr|A0A2K5ZWJ8|A0A2K5ZWJ8_MANLE	IF rod domain-containing protein OS=Mandrillus leucophaeus OX=9568 GN=KRT14 PE=3 SV=1	B6	1	9568	MANLE	Mandrillus leucophaeus
172	541	tr|A0A2K5ZWJ8|A0A2K5ZWJ8_MANLE	IF rod domain-containing protein OS=Mandrillus leucophaeus OX=9568 GN=KRT14 PE=3 SV=1	K1	19	9568	MANLE	Mandrillus leucophaeus
173	541	tr|A0A2K5ZWJ8|A0A2K5ZWJ8_MANLE	IF rod domain-containing protein OS=Mandrillus leucophaeus OX=9568 GN=KRT14 PE=3 SV=1	K2	5	9568	MANLE	Mandrillus leucophaeus
174	541	tr|A0A2K5ZWJ8|A0A2K5ZWJ8_MANLE	IF rod domain-containing protein OS=Mandrillus leucophaeus OX=9568 GN=KRT14 PE=3 SV=1	K3	15	9568	MANLE	Mandrillus leucophaeus
175	541	tr|A0A2K5ZWJ8|A0A2K5ZWJ8_MANLE	IF rod domain-containing protein OS=Mandrillus leucophaeus OX=9568 GN=KRT14 PE=3 SV=1	K4	1	9568	MANLE	Mandrillus leucophaeus
176	541	tr|A0A2K5ZWJ8|A0A2K5ZWJ8_MANLE	IF rod domain-containing protein OS=Mandrillus leucophaeus OX=9568 GN=KRT14 PE=3 SV=1	K5	8	9568	MANLE	Mandrillus leucophaeus
177	541	tr|A0A2K5JFW5|A0A2K5JFW5_COLAP	IF rod domain-containing protein OS=Colobus angolensis palliatus OX=336983 GN=KRT14 PE=3 SV=1	B1	0	336983	COLAP	Colobus angolensis palliatus
178	541	tr|A0A2K5JFW5|A0A2K5JFW5_COLAP	IF rod domain-containing protein OS=Colobus angolensis palliatus OX=336983 GN=KRT14 PE=3 SV=1	B2	0	336983	COLAP	Colobus angolensis palliatus
179	541	tr|A0A2K5JFW5|A0A2K5JFW5_COLAP	IF rod domain-containing protein OS=Colobus angolensis palliatus OX=336983 GN=KRT14 PE=3 SV=1	B3	0	336983	COLAP	Colobus angolensis palliatus
180	541	tr|A0A2K5JFW5|A0A2K5JFW5_COLAP	IF rod domain-containing protein OS=Colobus angolensis palliatus OX=336983 GN=KRT14 PE=3 SV=1	B4	5	336983	COLAP	Colobus angolensis palliatus
181	541	tr|A0A2K5JFW5|A0A2K5JFW5_COLAP	IF rod domain-containing protein OS=Colobus angolensis palliatus OX=336983 GN=KRT14 PE=3 SV=1	B5	3	336983	COLAP	Colobus angolensis palliatus
182	541	tr|A0A2K5JFW5|A0A2K5JFW5_COLAP	IF rod domain-containing protein OS=Colobus angolensis palliatus OX=336983 GN=KRT14 PE=3 SV=1	B6	1	336983	COLAP	Colobus angolensis palliatus
183	541	tr|A0A2K5JFW5|A0A2K5JFW5_COLAP	IF rod domain-containing protein OS=Colobus angolensis palliatus OX=336983 GN=KRT14 PE=3 SV=1	K1	19	336983	COLAP	Colobus angolensis palliatus
184	541	tr|A0A2K5JFW5|A0A2K5JFW5_COLAP	IF rod domain-containing protein OS=Colobus angolensis palliatus OX=336983 GN=KRT14 PE=3 SV=1	K2	5	336983	COLAP	Colobus angolensis palliatus
185	541	tr|A0A2K5JFW5|A0A2K5JFW5_COLAP	IF rod domain-containing protein OS=Colobus angolensis palliatus OX=336983 GN=KRT14 PE=3 SV=1	K3	15	336983	COLAP	Colobus angolensis palliatus
186	541	tr|A0A2K5JFW5|A0A2K5JFW5_COLAP	IF rod domain-containing protein OS=Colobus angolensis palliatus OX=336983 GN=KRT14 PE=3 SV=1	K4	1	336983	COLAP	Colobus angolensis palliatus
187	541	tr|A0A2K5JFW5|A0A2K5JFW5_COLAP	IF rod domain-containing protein OS=Colobus angolensis palliatus OX=336983 GN=KRT14 PE=3 SV=1	K5	8	336983	COLAP	Colobus angolensis palliatus
188	541	tr|A0A2K6LG66|A0A2K6LG66_RHIBE	IF rod domain-containing protein OS=Rhinopithecus bieti OX=61621 GN=KRT14 PE=3 SV=1	B1	0	61621	RHIBE	Rhinopithecus bieti
189	541	tr|A0A2K6LG66|A0A2K6LG66_RHIBE	IF rod domain-containing protein OS=Rhinopithecus bieti OX=61621 GN=KRT14 PE=3 SV=1	B2	0	61621	RHIBE	Rhinopithecus bieti
190	541	tr|A0A2K6LG66|A0A2K6LG66_RHIBE	IF rod domain-containing protein OS=Rhinopithecus bieti OX=61621 GN=KRT14 PE=3 SV=1	B3	0	61621	RHIBE	Rhinopithecus bieti
191	541	tr|A0A2K6LG66|A0A2K6LG66_RHIBE	IF rod domain-containing protein OS=Rhinopithecus bieti OX=61621 GN=KRT14 PE=3 SV=1	B4	5	61621	RHIBE	Rhinopithecus bieti
192	541	tr|A0A2K6LG66|A0A2K6LG66_RHIBE	IF rod domain-containing protein OS=Rhinopithecus bieti OX=61621 GN=KRT14 PE=3 SV=1	B5	3	61621	RHIBE	Rhinopithecus bieti
193	541	tr|A0A2K6LG66|A0A2K6LG66_RHIBE	IF rod domain-containing protein OS=Rhinopithecus bieti OX=61621 GN=KRT14 PE=3 SV=1	B6	1	61621	RHIBE	Rhinopithecus bieti
194	541	tr|A0A2K6LG66|A0A2K6LG66_RHIBE	IF rod domain-containing protein OS=Rhinopithecus bieti OX=61621 GN=KRT14 PE=3 SV=1	K1	19	61621	RHIBE	Rhinopithecus bieti
195	541	tr|A0A2K6LG66|A0A2K6LG66_RHIBE	IF rod domain-containing protein OS=Rhinopithecus bieti OX=61621 GN=KRT14 PE=3 SV=1	K2	5	61621	RHIBE	Rhinopithecus bieti
196	541	tr|A0A2K6LG66|A0A2K6LG66_RHIBE	IF rod domain-containing protein OS=Rhinopithecus bieti OX=61621 GN=KRT14 PE=3 SV=1	K3	15	61621	RHIBE	Rhinopithecus bieti
197	541	tr|A0A2K6LG66|A0A2K6LG66_RHIBE	IF rod domain-containing protein OS=Rhinopithecus bieti OX=61621 GN=KRT14 PE=3 SV=1	K4	1	61621	RHIBE	Rhinopithecus bieti
198	541	tr|A0A2K6LG66|A0A2K6LG66_RHIBE	IF rod domain-containing protein OS=Rhinopithecus bieti OX=61621 GN=KRT14 PE=3 SV=1	K5	8	61621	RHIBE	Rhinopithecus bieti
199	259	P00761|TRYP_PIG	Trypsin OS=Sus scrofa OX=9823 PE=1 SV=1	B1	5	9823	PIG	Sus scrofa
200	259	P00761|TRYP_PIG	Trypsin OS=Sus scrofa OX=9823 PE=1 SV=1	B2	0	9823	PIG	Sus scrofa
201	259	P00761|TRYP_PIG	Trypsin OS=Sus scrofa OX=9823 PE=1 SV=1	B3	7	9823	PIG	Sus scrofa
202	259	P00761|TRYP_PIG	Trypsin OS=Sus scrofa OX=9823 PE=1 SV=1	B4	0	9823	PIG	Sus scrofa
203	259	P00761|TRYP_PIG	Trypsin OS=Sus scrofa OX=9823 PE=1 SV=1	B5	5	9823	PIG	Sus scrofa
204	259	P00761|TRYP_PIG	Trypsin OS=Sus scrofa OX=9823 PE=1 SV=1	B6	10	9823	PIG	Sus scrofa
205	259	P00761|TRYP_PIG	Trypsin OS=Sus scrofa OX=9823 PE=1 SV=1	K1	1	9823	PIG	Sus scrofa
206	259	P00761|TRYP_PIG	Trypsin OS=Sus scrofa OX=9823 PE=1 SV=1	K2	11	9823	PIG	Sus scrofa
207	259	P00761|TRYP_PIG	Trypsin OS=Sus scrofa OX=9823 PE=1 SV=1	K3	17	9823	PIG	Sus scrofa
208	259	P00761|TRYP_PIG	Trypsin OS=Sus scrofa OX=9823 PE=1 SV=1	K4	19	9823	PIG	Sus scrofa
209	259	P00761|TRYP_PIG	Trypsin OS=Sus scrofa OX=9823 PE=1 SV=1	K5	49	9823	PIG	Sus scrofa
210	259	tr|A0A4X1V4D2|A0A4X1V4D2_PIG	Peptidase S1 domain-containing protein OS=Sus scrofa OX=9823 GN=LOC100302368 PE=4 SV=1	B1	5	9823	PIG	Sus scrofa
211	259	tr|A0A4X1V4D2|A0A4X1V4D2_PIG	Peptidase S1 domain-containing protein OS=Sus scrofa OX=9823 GN=LOC100302368 PE=4 SV=1	B2	0	9823	PIG	Sus scrofa
212	259	tr|A0A4X1V4D2|A0A4X1V4D2_PIG	Peptidase S1 domain-containing protein OS=Sus scrofa OX=9823 GN=LOC100302368 PE=4 SV=1	B3	7	9823	PIG	Sus scrofa
213	259	tr|A0A4X1V4D2|A0A4X1V4D2_PIG	Peptidase S1 domain-containing protein OS=Sus scrofa OX=9823 GN=LOC100302368 PE=4 SV=1	B4	0	9823	PIG	Sus scrofa
214	259	tr|A0A4X1V4D2|A0A4X1V4D2_PIG	Peptidase S1 domain-containing protein OS=Sus scrofa OX=9823 GN=LOC100302368 PE=4 SV=1	B5	5	9823	PIG	Sus scrofa
215	259	tr|A0A4X1V4D2|A0A4X1V4D2_PIG	Peptidase S1 domain-containing protein OS=Sus scrofa OX=9823 GN=LOC100302368 PE=4 SV=1	B6	10	9823	PIG	Sus scrofa
216	259	tr|A0A4X1V4D2|A0A4X1V4D2_PIG	Peptidase S1 domain-containing protein OS=Sus scrofa OX=9823 GN=LOC100302368 PE=4 SV=1	K1	1	9823	PIG	Sus scrofa
217	259	tr|A0A4X1V4D2|A0A4X1V4D2_PIG	Peptidase S1 domain-containing protein OS=Sus scrofa OX=9823 GN=LOC100302368 PE=4 SV=1	K2	11	9823	PIG	Sus scrofa
218	259	tr|A0A4X1V4D2|A0A4X1V4D2_PIG	Peptidase S1 domain-containing protein OS=Sus scrofa OX=9823 GN=LOC100302368 PE=4 SV=1	K3	17	9823	PIG	Sus scrofa
219	259	tr|A0A4X1V4D2|A0A4X1V4D2_PIG	Peptidase S1 domain-containing protein OS=Sus scrofa OX=9823 GN=LOC100302368 PE=4 SV=1	K4	19	9823	PIG	Sus scrofa
220	259	tr|A0A4X1V4D2|A0A4X1V4D2_PIG	Peptidase S1 domain-containing protein OS=Sus scrofa OX=9823 GN=LOC100302368 PE=4 SV=1	K5	49	9823	PIG	Sus scrofa
221	259	tr|C5IWV5|C5IWV5_PIG	Trypsinogen OS=Sus scrofa OX=9823 PE=2 SV=1	B1	5	9823	PIG	Sus scrofa
222	259	tr|C5IWV5|C5IWV5_PIG	Trypsinogen OS=Sus scrofa OX=9823 PE=2 SV=1	B2	0	9823	PIG	Sus scrofa
223	259	tr|C5IWV5|C5IWV5_PIG	Trypsinogen OS=Sus scrofa OX=9823 PE=2 SV=1	B3	7	9823	PIG	Sus scrofa
224	259	tr|C5IWV5|C5IWV5_PIG	Trypsinogen OS=Sus scrofa OX=9823 PE=2 SV=1	B4	0	9823	PIG	Sus scrofa
225	259	tr|C5IWV5|C5IWV5_PIG	Trypsinogen OS=Sus scrofa OX=9823 PE=2 SV=1	B5	5	9823	PIG	Sus scrofa
226	259	tr|C5IWV5|C5IWV5_PIG	Trypsinogen OS=Sus scrofa OX=9823 PE=2 SV=1	B6	10	9823	PIG	Sus scrofa
227	259	tr|C5IWV5|C5IWV5_PIG	Trypsinogen OS=Sus scrofa OX=9823 PE=2 SV=1	K1	1	9823	PIG	Sus scrofa
228	259	tr|C5IWV5|C5IWV5_PIG	Trypsinogen OS=Sus scrofa OX=9823 PE=2 SV=1	K2	11	9823	PIG	Sus scrofa
229	259	tr|C5IWV5|C5IWV5_PIG	Trypsinogen OS=Sus scrofa OX=9823 PE=2 SV=1	K3	17	9823	PIG	Sus scrofa
230	259	tr|C5IWV5|C5IWV5_PIG	Trypsinogen OS=Sus scrofa OX=9823 PE=2 SV=1	K4	19	9823	PIG	Sus scrofa
231	259	tr|C5IWV5|C5IWV5_PIG	Trypsinogen OS=Sus scrofa OX=9823 PE=2 SV=1	K5	49	9823	PIG	Sus scrofa
232	259	tr|A0A4X1V2S2|A0A4X1V2S2_PIG	Peptidase S1 domain-containing protein OS=Sus scrofa OX=9823 GN=LOC100302368 PE=4 SV=1	B1	5	9823	PIG	Sus scrofa
233	259	tr|A0A4X1V2S2|A0A4X1V2S2_PIG	Peptidase S1 domain-containing protein OS=Sus scrofa OX=9823 GN=LOC100302368 PE=4 SV=1	B2	0	9823	PIG	Sus scrofa
234	259	tr|A0A4X1V2S2|A0A4X1V2S2_PIG	Peptidase S1 domain-containing protein OS=Sus scrofa OX=9823 GN=LOC100302368 PE=4 SV=1	B3	7	9823	PIG	Sus scrofa
235	259	tr|A0A4X1V2S2|A0A4X1V2S2_PIG	Peptidase S1 domain-containing protein OS=Sus scrofa OX=9823 GN=LOC100302368 PE=4 SV=1	B4	0	9823	PIG	Sus scrofa
236	259	tr|A0A4X1V2S2|A0A4X1V2S2_PIG	Peptidase S1 domain-containing protein OS=Sus scrofa OX=9823 GN=LOC100302368 PE=4 SV=1	B5	5	9823	PIG	Sus scrofa
237	259	tr|A0A4X1V2S2|A0A4X1V2S2_PIG	Peptidase S1 domain-containing protein OS=Sus scrofa OX=9823 GN=LOC100302368 PE=4 SV=1	B6	10	9823	PIG	Sus scrofa
238	259	tr|A0A4X1V2S2|A0A4X1V2S2_PIG	Peptidase S1 domain-containing protein OS=Sus scrofa OX=9823 GN=LOC100302368 PE=4 SV=1	K1	1	9823	PIG	Sus scrofa
239	259	tr|A0A4X1V2S2|A0A4X1V2S2_PIG	Peptidase S1 domain-containing protein OS=Sus scrofa OX=9823 GN=LOC100302368 PE=4 SV=1	K2	11	9823	PIG	Sus scrofa
240	259	tr|A0A4X1V2S2|A0A4X1V2S2_PIG	Peptidase S1 domain-containing protein OS=Sus scrofa OX=9823 GN=LOC100302368 PE=4 SV=1	K3	17	9823	PIG	Sus scrofa
241	259	tr|A0A4X1V2S2|A0A4X1V2S2_PIG	Peptidase S1 domain-containing protein OS=Sus scrofa OX=9823 GN=LOC100302368 PE=4 SV=1	K4	19	9823	PIG	Sus scrofa
242	259	tr|A0A4X1V2S2|A0A4X1V2S2_PIG	Peptidase S1 domain-containing protein OS=Sus scrofa OX=9823 GN=LOC100302368 PE=4 SV=1	K5	49	9823	PIG	Sus scrofa
243	259	tr|A0A287B5W2|A0A287B5W2_PIG	Trypsinogen isoform X1 OS=Sus scrofa OX=9823 GN=LOC100302368 PE=4 SV=1	B1	5	9823	PIG	Sus scrofa
244	259	tr|A0A287B5W2|A0A287B5W2_PIG	Trypsinogen isoform X1 OS=Sus scrofa OX=9823 GN=LOC100302368 PE=4 SV=1	B2	0	9823	PIG	Sus scrofa
245	259	tr|A0A287B5W2|A0A287B5W2_PIG	Trypsinogen isoform X1 OS=Sus scrofa OX=9823 GN=LOC100302368 PE=4 SV=1	B3	7	9823	PIG	Sus scrofa
246	259	tr|A0A287B5W2|A0A287B5W2_PIG	Trypsinogen isoform X1 OS=Sus scrofa OX=9823 GN=LOC100302368 PE=4 SV=1	B4	0	9823	PIG	Sus scrofa
247	259	tr|A0A287B5W2|A0A287B5W2_PIG	Trypsinogen isoform X1 OS=Sus scrofa OX=9823 GN=LOC100302368 PE=4 SV=1	B5	5	9823	PIG	Sus scrofa
248	259	tr|A0A287B5W2|A0A287B5W2_PIG	Trypsinogen isoform X1 OS=Sus scrofa OX=9823 GN=LOC100302368 PE=4 SV=1	B6	10	9823	PIG	Sus scrofa
249	259	tr|A0A287B5W2|A0A287B5W2_PIG	Trypsinogen isoform X1 OS=Sus scrofa OX=9823 GN=LOC100302368 PE=4 SV=1	K1	1	9823	PIG	Sus scrofa
250	259	tr|A0A287B5W2|A0A287B5W2_PIG	Trypsinogen isoform X1 OS=Sus scrofa OX=9823 GN=LOC100302368 PE=4 SV=1	K2	11	9823	PIG	Sus scrofa
251	259	tr|A0A287B5W2|A0A287B5W2_PIG	Trypsinogen isoform X1 OS=Sus scrofa OX=9823 GN=LOC100302368 PE=4 SV=1	K3	17	9823	PIG	Sus scrofa
252	259	tr|A0A287B5W2|A0A287B5W2_PIG	Trypsinogen isoform X1 OS=Sus scrofa OX=9823 GN=LOC100302368 PE=4 SV=1	K4	19	9823	PIG	Sus scrofa
253	259	tr|A0A287B5W2|A0A287B5W2_PIG	Trypsinogen isoform X1 OS=Sus scrofa OX=9823 GN=LOC100302368 PE=4 SV=1	K5	49	9823	PIG	Sus scrofa
